# Supplementary material for: Whole-Transcriptome Sequencing of Antler Tissue Reveals That circRNA2829 Regulates Chondrocyte Proliferation and Differentiation via the miR-4286-R+1/FOXO4 Axis
Source: MDPI journal article supplement (doi:10.3390/ijms24087204), 2023-04-13
Supplement: s1 [file s1]

**Table S1.** Specific primer sequences for qPCR and RT-PCR.

| Gene                   | Forward primer (5'-3')   | Reverse primer (5'-3')   |
|------------------------|--------------------------|--------------------------|
| circRNA1803            | GCACAGTCATCGTCCCCTTT     | CAACCTTAACCACGCCATACAC   |
| circRNA3045            | CGGCCTGGGATTTAAAGG       | GGATGGATGGACAGATGGATAG   |
| circRNA686             | CAAACCGAAACACAAGGGAA     | GAGTGGGCGTAGGAGGCA       |
| circRNA856             | GGCGCAGATGGAACCTCAA      | CGAATCAGGCTGAAGTCCATAG   |
| circRNA4658            | GCAAGAAGGCGGACACCA       | CTTATCAATGACCGCCCCG      |
| MSTRG.17242            | GCATCTTCTCCACACCCTCAA    | TCCACTAGCTTCGCACTCTCAT   |
| MSTRG.19659            | GAAGTGAAGCAGCAGGCGA      | AGAGCGAGCAAAGGAAGACC     |
| MSTRG.2983             | TCAATCTCCATCCTCACCCC     | GCTTAAACTCCTCATGCACCTG   |
| MSTRG.27000            | AATTGCAGTGCATTTGGGC      | TCTGTTCTCGTGAGTTGTGTGCG  |
| MSTRG.3522             | ATCAACGCCTACCTGCACATC    | AGCAAACGCAATCAAGACTCC    |
| mRNA1803               | ACCTTTAATTCGCCACCTT      | GCTTTTCACCTCACTTCCCAT    |
| mRNA3045               | GAGAGTGCTTGTGTTTCGGTTT   | TGAGAAGTGAGGAAAAATCGGG   |
| mRNA686                | ACAGAACCGATGTGGAGTATGAG  | GAGAGTGCTTGTGTTTCGGTTT   |
| mRNA856                | CATGACGTTGCACCTTCCAA     | TCCTCGTTTCTCTGCTCGC      |
| mNA4658                | GACTGCCAACGAATCTGCC      | TGTGCCTCTGTATTTCCCGA     |
| $\beta$ -actin         | GCACCCAGCACGATGAAAAT     | GACAATGGAGGGTCCGGATT     |
| circRNA2829 for q-PCR  | CGAAATGAGGGACCTGTTACC    | GACACATCCATCAGGCGTAAA    |
| circRNA2829 convergent | TATGGTCCCTATTCTGATGTCTCA | CTGTAATCGACAGCAATACTGTGC |
| circRNA2829 divergent  | TTACGCCTGATGGATGTGTC     | AAGAGATACAAGGTGCTTTGCA   |
| FOXO4                  | GTGCTGGCGGAAGAGGAAA      | CGAGTGGGGAGATGTGAGATTG   |
| OCN                    | GCAGCGAGGTGGTGAAGAGA     | GAAGCCGATGTGGTCAGCTA     |
| BMP2                   | GTAGGTGGGAGAGCTTCGAT     | GGCGTTTCCGCTGTTTATGT     |
| RUNX2                  | AGCTATTAAAGTCACAGTGGATGG | GGCGATCAGAGAACAAACTAGG   |
| SOX9                   | CCCCCCTACTACCCCAAAA      | CGCTACTCAGTTTCGCCGATG    |
