# Supplementary material for: Whole-Transcriptome Sequencing of Antler Tissue Reveals That circRNA2829 Regulates Chondrocyte Proliferation and Differentiation via the miR-4286-R+1/FOXO4 Axis
Source: Int J Mol Sci. 2023 Apr 13;24(8):7204. doi: 10.3390/ijms24087204 (PMC10139046; doi:10.3390/ijms24087204)
Supplement: Supplementary file 1 [file ijms-24-07204-s001.zip]

Archive with 5 entries (5 files):
- Supplementary table1.pdf
- SupplementaryFile1.xlsx
- SupplementaryFile2.xlsx
- SupplementaryFile3.xlsx
- SupplementaryFile4.pdf
