# Supplementary material for: Whole-Transcriptome Sequencing of Antler Tissue Reveals That circRNA2829 Regulates Chondrocyte Proliferation and Differentiation via the miR-4286-R+1/FOXO4 Axis
Source: Int J Mol Sci. 2023 Apr 13;24(8):7204. doi: 10.3390/ijms24087204 (PMC10139046; doi:10.3390/ijms24087204)
Supplement: Supplementary file 1 [file ijms-24-07204-s001.zip › SupplementaryFile1.xlsx]

## Sheet: Sheet1
Supplementary File S1. Differentially expressed circRNA in CvsM
Accession	log2FoldChange	regulation	pvalue	qvalue	significant	circType	gene Discription
circRNA992	inf	up	1.77502e-14	7.75862e-11	yes	circRNA	collagen alpha-1(II) chain isoform X2 [Odocoileus virginianus texanus]
circRNA1668	inf	up	6.24108e-11	1.08079e-07	yes	intergenic	NA
circRNA6815	-inf	down	7.41794e-11	1.08079e-07	yes	intergenic	NA
ciRNA206	-3.66473	down	1.0742e-09	1.17383e-06	yes	ciRNA	hypothetical protein Celaphus_00003615 [Cervus elaphus hippelaphus]
circRNA2744	inf	up	8.89693e-09	6.83399e-06	yes	intergenic	NA
circRNA2924	inf	up	9.3809e-09	6.83399e-06	yes	intergenic	NA
circRNA994	inf	up	2.84522e-06	0.00177664	yes	circRNA	collagen alpha-1(II) chain isoform X2 [Odocoileus virginianus texanus]
circRNA6996	-inf	down	5.04598e-06	0.002757	yes	intergenic	NA
circRNA2442	inf	up	1.46612e-05	0.00712043	yes	intergenic	NA
circRNA2077	inf	up	2.45575e-05	0.0107341	yes	intergenic	NA
circRNA2173	inf	up	2.87149e-05	0.0114102	yes	intergenic	NA
circRNA1635	inf	up	4.18757e-05	0.0152532	yes	intergenic	NA
circRNA2434	4.28381	up	8.47899e-05	0.0273215	yes	intergenic	NA
circRNA2038	inf	up	8.75087e-05	0.0273215	yes	intergenic	NA
circRNA2745	inf	up	0.000152152	0.0443371	yes	intergenic	NA
circRNA7800	-inf	down	0.000236561	0.0646254	yes	intergenic	NA
circRNA1516	4.25728	up	0.000261315	0.0671886	yes	intergenic	NA
circRNA1355	inf	up	0.00030317	0.0736199	yes	intergenic	NA
circRNA7056	-inf	down	0.000370998	0.0853321	yes	intergenic	NA
circRNA2097	2.3047	up	0.000394188	0.0853321	yes	intergenic	NA
circRNA7084	-inf	down	0.000409969	0.0853321	yes	intergenic	NA
circRNA856	-3.6915	down	0.000754503	0.149906	yes	circRNA	hypothetical protein Celaphus_00016476, partial [Cervus elaphus hippelaphus]
ciRNA234	2.29805	up	0.000798326	0.151717	yes	ciRNA	hypothetical protein Celaphus_00000883 [Cervus elaphus hippelaphus]
circRNA2927	inf	up	0.00106547	0.19405	yes	intergenic	NA
circRNA2928	inf	up	0.00142019	0.248306	yes	intergenic	NA
circRNA686	2.19753	up	0.00150006	0.251131	yes	circRNA	PREDICTED: alkaline phosphatase, tissue-nonspecific isozyme isoform X1 [Equus przewalskii]
circRNA1959	-3.52864	down	0.001563	0.251131	yes	intergenic	NA
circRNA7792	-inf	down	0.00160871	0.251131	yes	intergenic	NA
circRNA3056	3.08548	up	0.00189478	0.285589	yes	intergenic	NA
circRNA1825	inf	up	0.00201942	0.291924	yes	intergenic	NA
circRNA6781	-inf	down	0.00207038	0.291924	yes	intergenic	NA
circRNA2893	1.76079	up	0.00218706	0.298739	yes	intergenic	NA
circRNA1714	inf	up	0.00234585	0.303809	yes	intergenic	NA
circRNA2441	3.6121	up	0.00236319	0.303809	yes	intergenic	NA
circRNA532	-1.91357	down	0.00249559	0.311663	yes	circRNA	hypothetical protein Celaphus_00000884 [Cervus elaphus hippelaphus]
circRNA2907	2.48024	up	0.00260765	0.315475	yes	intergenic	NA
circRNA1803	3.12572	up	0.0027042	0.315475	yes	intergenic	NA
circRNA6838	-inf	down	0.00274264	0.315475	yes	intergenic	NA
circRNA1310	inf	up	0.00285497	0.316247	yes	intergenic	NA
circRNA866	4.46733	up	0.00289405	0.316247	yes	circRNA	SOBP, partial [Cervus elaphus hippelaphus]
circRNA6585	-inf	down	0.00336797	0.345459	yes	intergenic	NA
circRNA1849	2.86965	up	0.00339081	0.345459	yes	intergenic	NA
circRNA6588	-inf	down	0.00339847	0.345459	yes	intergenic	NA
circRNA266	2.05354	up	0.00378862	0.376365	yes	circRNA	ACAN [Cervus elaphus hippelaphus]
circRNA2430	inf	up	0.0039943	0.38798	yes	intergenic	NA
circRNA4333	inf	up	0.0042412	0.403006	yes	intergenic	NA
circRNA6930	-inf	down	0.00467621	0.428975	yes	intergenic	NA
circRNA1283	3.73215	up	0.00478743	0.428975	yes	intergenic	NA
circRNA2762	2.95785	up	0.00489379	0.428975	yes	intergenic	NA
circRNA7130	-inf	down	0.00502227	0.428975	yes	circRNA	SIRPA [Cervus elaphus hippelaphus]
circRNA117	-2.09355	down	0.00502693	0.428975	yes	circRNA	ARSE, partial [Cervus elaphus hippelaphus]
circRNA92	3.62362	up	0.00510334	0.428975	yes	circRNA	hypothetical protein Celaphus_00015702 [Cervus elaphus hippelaphus]
circRNA2958	-1.98715	down	0.00520987	0.429667	yes	intergenic	NA
circRNA2926	3.24063	up	0.00531705	0.430386	yes	intergenic	NA
circRNA1271	3.0699	up	0.0054949	0.436694	yes	intergenic	NA
circRNA3045	2.79708	up	0.00567803	0.441946	yes	intergenic	NA
circRNA2106	-2.96653	down	0.00576319	0.441946	yes	intergenic	NA
circRNA2381	-2.50944	down	0.00586625	0.442093	yes	intergenic	NA
circRNA2532	2.95199	up	0.00693373	0.513684	yes	intergenic	NA
circRNA1596	1.56649	up	0.00729398	0.515906	yes	intergenic	NA
circRNA2089	inf	up	0.00734168	0.515906	yes	intergenic	NA
circRNA2084	2.00824	up	0.00737451	0.515906	yes	intergenic	NA
circRNA876	-2.10616	down	0.00752887	0.515906	yes	circRNA	hypothetical protein Celaphus_00017727 [Cervus elaphus hippelaphus]
circRNA1804	inf	up	0.00774694	0.515906	yes	intergenic	NA
circRNA7050	-inf	down	0.00777578	0.515906	yes	intergenic	NA
circRNA4658	-3.71788	down	0.00778993	0.515906	yes	circRNA	hypothetical protein Celaphus_00011140 [Cervus elaphus hippelaphus]
circRNA7754	-inf	down	0.00801008	0.522568	yes	intergenic	NA
circRNA1932	inf	up	0.00844252	0.54268	yes	intergenic	NA
circRNA7018	-inf	down	0.00897459	0.563479	yes	intergenic	NA
circRNA2770	inf	up	0.00902392	0.563479	yes	intergenic	NA
circRNA2852	inf	up	0.00949744	0.580289	yes	intergenic	NA
circRNA2880	inf	up	0.00965052	0.580289	yes	intergenic	NA
circRNA7778	-inf	down	0.0096914	0.580289	yes	intergenic	NA
circRNA1963	inf	up	0.0106153	0.627022	yes	intergenic	NA
circRNA2037	inf	up	0.0111194	0.648041	yes	intergenic	NA
circRNA2354	3.05738	up	0.0124809	0.715033	yes	intergenic	NA
circRNA6515	-inf	down	0.0125961	0.715033	yes	circRNA	AFF1, partial [Cervus elaphus hippelaphus]
circRNA1895	inf	up	0.0128317	0.719069	yes	intergenic	NA
circRNA4135	-2.25625	down	0.0133023	0.736007	yes	intergenic	NA
circRNA2775	1.58451	up	0.0141313	0.746088	yes	intergenic	NA
circRNA1900	3.63516	up	0.0143406	0.746088	yes	intergenic	NA
circRNA110	-2.15776	down	0.0143467	0.746088	yes	circRNA	HMGB3 [Cervus elaphus hippelaphus]
circRNA1325	inf	up	0.0144376	0.746088	yes	intergenic	NA
circRNA1744	3.53591	up	0.0145269	0.746088	yes	intergenic	NA
circRNA6673	-inf	down	0.014646	0.746088	yes	intergenic	NA
circRNA1665	2.84869	up	0.0146794	0.746088	yes	intergenic	NA
circRNA373	-1.39635	down	0.0156121	0.784373	yes	circRNA	hypothetical protein Celaphus_00007359 [Cervus elaphus hippelaphus]
circRNA1493	2.92087	up	0.0160135	0.795398	yes	intergenic	NA
circRNA2667	-1.83152	down	0.0162882	0.799953	yes	intergenic	NA
circRNA2446	2.36863	up	0.0177211	0.855328	yes	intergenic	NA
circRNA1821	1.59347	up	0.0178071	0.855328	yes	intergenic	NA
circRNA2891	1.63813	up	0.0181108	0.860458	yes	intergenic	NA
circRNA6761	-inf	down	0.0184639	0.865839	yes	intergenic	NA
ciRNA214	inf	up	0.0186202	0.865839	yes	ciRNA	hypothetical protein Celaphus_00005877, partial [Cervus elaphus hippelaphus]
circRNA2064	inf	up	0.0188391	0.866796	yes	intergenic	NA
circRNA2606	inf	up	0.0195334	0.884459	yes	intergenic	NA
circRNA1890	3.41473	up	0.0196277	0.884459	yes	intergenic	NA
circRNA2257	inf	up	0.0202747	0.904293	yes	intergenic	NA
circRNA2617	2.42179	up	0.0209955	0.918446	yes	intergenic	NA
circRNA2056	-1.30506	down	0.0210981	0.918446	yes	intergenic	NA
circRNA1167	2.02165	up	0.0212224	0.918446	yes	circRNA	WWP2, partial [Cervus elaphus hippelaphus]
circRNA4401	inf	up	0.0225008	0.959985	yes	circRNA	IL16 [Cervus elaphus hippelaphus]
circRNA1745	2.07001	up	0.02273	0.959985	yes	intergenic	NA
circRNA1237	-1.47265	down	0.0228411	0.959985	yes	intergenic	NA
circRNA2461	-1.7101	down	0.0236972	0.986479	yes	intergenic	NA
circRNA2443	inf	up	0.0242231	0.998859	yes	intergenic	NA
circRNA1754	1.20333	up	0.024919	1	yes	intergenic	NA
circRNA1901	inf	up	0.0251552	1	yes	intergenic	NA
circRNA6904	-inf	down	0.0253048	1	yes	intergenic	NA
circRNA2596	inf	up	0.0254067	1	yes	intergenic	NA
circRNA1484	2.29103	up	0.0255679	1	yes	intergenic	NA
circRNA2414	-1.49144	down	0.0257179	1	yes	intergenic	NA
circRNA1735	inf	up	0.0263337	1	yes	intergenic	NA
circRNA1693	inf	up	0.0267298	1	yes	intergenic	NA
circRNA2131	2.17529	up	0.0270344	1	yes	intergenic	NA
circRNA4335	-3.42056	down	0.0272244	1	yes	intergenic	NA
circRNA1256	inf	up	0.0277015	1	yes	intergenic	NA
circRNA2930	inf	up	0.0277628	1	yes	intergenic	NA
circRNA4141	-3.19057	down	0.0279273	1	yes	intergenic	NA
circRNA4050	inf	up	0.0279932	1	yes	intergenic	NA
circRNA2217	-2.40889	down	0.0285037	1	yes	intergenic	NA
circRNA2431	2.33362	up	0.0285849	1	yes	intergenic	NA
circRNA5616	-3.4376	down	0.0287108	1	yes	intergenic	NA
circRNA1419	inf	up	0.029331	1	yes	intergenic	NA
circRNA6390	-inf	down	0.0299536	1	yes	circRNA	SMG9 [Cervus elaphus hippelaphus]
circRNA3025	1.64566	up	0.0315912	1	yes	intergenic	NA
ciRNA239	-1.37466	down	0.0326267	1	yes	ciRNA	PHLDB2, partial [Cervus elaphus hippelaphus]
ciRNA131	1.39987	up	0.0327187	1	yes	ciRNA	FAH [Cervus elaphus hippelaphus]
circRNA1520	inf	up	0.0332709	1	yes	intergenic	NA
circRNA1342	-1.77835	down	0.0333917	1	yes	intergenic	NA
circRNA6884	-inf	down	0.0338166	1	yes	intergenic	NA
circRNA2829	3.34903	up	0.0338736	1	yes	intergenic	NA
circRNA1841	inf	up	0.0340942	1	yes	intergenic	NA
circRNA2025	2.92234	up	0.0344526	1	yes	intergenic	NA
circRNA6725	-inf	down	0.0344955	1	yes	intergenic	NA
circRNA2460	-1.47327	down	0.0350085	1	yes	intergenic	NA
circRNA6689	-inf	down	0.035106	1	yes	intergenic	NA
circRNA2749	1.95766	up	0.0355181	1	yes	intergenic	NA
circRNA1687	1.20886	up	0.0356676	1	yes	intergenic	NA
circRNA3073	2.21914	up	0.0360046	1	yes	intergenic	NA
circRNA6826	-inf	down	0.0371333	1	yes	intergenic	NA
circRNA2827	inf	up	0.0379636	1	yes	intergenic	NA
circRNA2045	1.17633	up	0.0383498	1	yes	intergenic	NA
circRNA1986	inf	up	0.0384396	1	yes	intergenic	NA
circRNA1139	inf	up	0.0387331	1	yes	circRNA	hypothetical protein Celaphus_00018732, partial [Cervus elaphus hippelaphus]
circRNA1483	1.08545	up	0.0388239	1	yes	intergenic	NA
circRNA1557	-1.83796	down	0.0389455	1	yes	intergenic	NA
circRNA200	1.4338	up	0.0391948	1	yes	circRNA	CYP26B1 [Cervus elaphus hippelaphus]
circRNA3003	inf	up	0.0393783	1	yes	intergenic	NA
circRNA2215	3.16137	up	0.0394439	1	yes	intergenic	NA
circRNA2712	inf	up	0.0397236	1	yes	intergenic	NA
circRNA6739	-inf	down	0.0398936	1	yes	intergenic	NA
circRNA3069	-1.39784	down	0.0406091	1	yes	intergenic	NA
circRNA580	-1.3791	down	0.0413585	1	yes	circRNA	low-density lipoprotein receptor [Odocoileus virginianus texanus]
circRNA2491	-1.94485	down	0.0417039	1	yes	intergenic	NA
circRNA4227	2.95273	up	0.0419193	1	yes	intergenic	NA
circRNA7002	-inf	down	0.0419499	1	yes	intergenic	NA
circRNA1395	1.44797	up	0.0428061	1	yes	intergenic	NA
circRNA2837	inf	up	0.0437491	1	yes	intergenic	NA
ciRNA159	inf	up	0.0438308	1	yes	ciRNA	DMKN, partial [Cervus elaphus hippelaphus]
ciRNA266	inf	up	0.0444088	1	yes	ciRNA	VPS72 [Cervus elaphus hippelaphus]
circRNA4266	inf	up	0.0444613	1	yes	intergenic	NA
circRNA400	-1.55765	down	0.0449805	1	yes	circRNA	NUP205 [Cervus elaphus hippelaphus]
circRNA694	-1.1511	down	0.0450076	1	yes	circRNA	ARMC9 [Cervus elaphus hippelaphus]
circRNA2642	inf	up	0.0452851	1	yes	intergenic	NA
circRNA1608	2.15033	up	0.0460301	1	yes	intergenic	NA
circRNA1383	3.09879	up	0.0469978	1	yes	intergenic	NA
circRNA1597	0.976979	up	0.0470443	1	no	intergenic	NA
circRNA2062	inf	up	0.0475039	1	yes	intergenic	NA
circRNA1236	inf	up	0.0478979	1	yes	intergenic	NA
ciRNA115	inf	up	0.0479945	1	yes	ciRNA	NUP133 [Cervus elaphus hippelaphus]
circRNA2514	1.20903	up	0.0481685	1	yes	intergenic	NA
circRNA1616	1.13617	up	0.0488136	1	yes	intergenic	NA
circRNA2669	inf	up	0.0488761	1	yes	intergenic	NA
circRNA2117	2.32623	up	0.0490974	1	yes	intergenic	NA
circRNA793	-1.93624	down	0.0498842	1	yes	circRNA	PREDICTED: protein Hook homolog 3 [Pantholops hodgsonii]
circRNA1545	inf	up	0.0501144	1	no	intergenic	NA
circRNA2703	-2.16758	down	0.0501396	1	no	intergenic	NA
circRNA4340	-3.19061	down	0.0506765	1	no	intergenic	NA
circRNA3004	3.17131	up	0.0507953	1	no	intergenic	NA
circRNA4336	inf	up	0.0508216	1	no	intergenic	NA
circRNA1304	3.0804	up	0.0513465	1	no	intergenic	NA
circRNA2374	inf	up	0.0513685	1	no	intergenic	NA
circRNA1718	2.68495	up	0.0517354	1	no	intergenic	NA
circRNA7146	-inf	down	0.0518701	1	no	circRNA	BORA [Cervus elaphus hippelaphus]
ciRNA833	-inf	down	0.0519767	1	no	ciRNA	kinesin-like protein KIF23 isoform X1 [Odocoileus virginianus texanus]
circRNA6775	-inf	down	0.0528414	1	no	intergenic	NA
circRNA3983	inf	up	0.0533512	1	no	intergenic	NA
circRNA2054	-1.04542	down	0.0534067	1	no	intergenic	NA
circRNA2115	inf	up	0.0534218	1	no	intergenic	NA
circRNA3723	-3.25088	down	0.0536472	1	no	intergenic	NA
circRNA133	inf	up	0.0539923	1	no	circRNA	hypothetical protein Celaphus_00008474 [Cervus elaphus hippelaphus]
circRNA4136	inf	up	0.0540045	1	no	intergenic	NA
circRNA2094	inf	up	0.0540119	1	no	intergenic	NA
ciRNA904	-inf	down	0.0543679	1	no	ciRNA	MYCBP2, partial [Cervus elaphus hippelaphus]
circRNA2656	2.03426	up	0.0554793	1	no	intergenic	NA
circRNA3169	1.87004	up	0.0556122	1	no	circRNA	MYO1F [Cervus elaphus hippelaphus]
ciRNA261	-1.50433	down	0.0556741	1	no	ciRNA	MRPS16 [Cervus elaphus hippelaphus]
circRNA320	-3.12358	down	0.0560993	1	no	circRNA	hypothetical protein Celaphus_00014584 [Cervus elaphus hippelaphus]
circRNA2096	inf	up	0.0565041	1	no	intergenic	NA
circRNA4242	inf	up	0.0568496	1	no	intergenic	NA
circRNA1198	3.00741	up	0.0578196	1	no	intergenic	NA
circRNA2591	-1.7043	down	0.0578763	1	no	intergenic	NA
circRNA118	1.33574	up	0.0581781	1	no	circRNA	hypothetical protein Celaphus_00010148, partial [Cervus elaphus hippelaphus]
circRNA1519	inf	up	0.0587382	1	no	intergenic	NA
circRNA2960	-2.02129	down	0.0594933	1	no	intergenic	NA
circRNA2157	-1.43299	down	0.0597774	1	no	intergenic	NA
circRNA3086	inf	up	0.0599799	1	no	intergenic	NA
circRNA1219	1.71982	up	0.0609887	1	no	intergenic	NA
ciRNA171	inf	up	0.0621409	1	no	ciRNA	hypothetical protein Celaphus_00007440 [Cervus elaphus hippelaphus]
circRNA4076	inf	up	0.0623577	1	no	intergenic	NA
ciRNA253	1.7618	up	0.0625321	1	no	ciRNA	hypothetical protein Celaphus_00002041 [Cervus elaphus hippelaphus]
circRNA1753	inf	up	0.0625979	1	no	intergenic	NA
circRNA6955	-inf	down	0.0640235	1	no	intergenic	NA
ciRNA658	-2.06926	down	0.0644239	1	no	ciRNA	hypothetical protein Celaphus_00005758 [Cervus elaphus hippelaphus]
circRNA3816	-3.11182	down	0.0646172	1	no	intergenic	NA
circRNA1044	inf	up	0.0648619	1	no	circRNA	BBS2 [Cervus elaphus hippelaphus]
ciRNA891	-inf	down	0.0655256	1	no	ciRNA	NBAS [Cervus elaphus hippelaphus]
circRNA2547	2.66293	up	0.0657705	1	no	intergenic	NA
circRNA1095	-2.58348	down	0.0663719	1	no	circRNA	MTERF3 [Cervus elaphus hippelaphus]
circRNA1438	1.31203	up	0.0669955	1	no	intergenic	NA
circRNA3160	inf	up	0.0678595	1	no	circRNA	hypothetical protein Celaphus_00013399 [Cervus elaphus hippelaphus]
circRNA2284	inf	up	0.0680993	1	no	intergenic	NA
circRNA6716	-inf	down	0.0689219	1	no	intergenic	NA
circRNA6951	-inf	down	0.0689675	1	no	intergenic	NA
circRNA2448	inf	up	0.0691083	1	no	intergenic	NA
circRNA5810	-3.52357	down	0.0695992	1	no	intergenic	NA
circRNA2000	1.65561	up	0.0697428	1	no	intergenic	NA
circRNA1472	1.96035	up	0.0709238	1	no	intergenic	NA
ciRNA208	1.7534	up	0.0713641	1	no	ciRNA	hypothetical protein Celaphus_00000896, partial [Cervus elaphus hippelaphus]
circRNA6747	-inf	down	0.0717028	1	no	intergenic	NA
circRNA1978	1.39042	up	0.072599	1	no	intergenic	NA
ciRNA864	-inf	down	0.0728957	1	no	ciRNA	serine/threonine-protein kinase ULK2 [Bos taurus]
circRNA2347	-1.32892	down	0.0730232	1	no	intergenic	NA
circRNA1808	-1.62164	down	0.0736225	1	no	intergenic	NA
circRNA1275	1.50618	up	0.0752184	1	no	intergenic	NA
circRNA1850	-3.14816	down	0.0759344	1	no	intergenic	NA
circRNA2779	1.37204	up	0.0765242	1	no	intergenic	NA
ciRNA158	1.79406	up	0.0771471	1	no	ciRNA	FGD3 [Cervus elaphus hippelaphus]
circRNA2761	-1.04308	down	0.0776146	1	no	intergenic	NA
circRNA1548	-3.0861	down	0.0776949	1	no	intergenic	NA
circRNA2842	inf	up	0.0787088	1	no	intergenic	NA
circRNA6590	-inf	down	0.0787396	1	no	intergenic	NA
circRNA3791	inf	up	0.0787737	1	no	intergenic	NA
circRNA2232	1.3348	up	0.079117	1	no	intergenic	NA
circRNA3167	1.53996	up	0.0793647	1	no	circRNA	LNX2 [Cervus elaphus hippelaphus]
circRNA3695	inf	up	0.0794739	1	no	intergenic	NA
circRNA1362	1.79641	up	0.0796028	1	no	intergenic	NA
circRNA1919	inf	up	0.0798999	1	no	intergenic	NA
circRNA908	1.14362	up	0.0800894	1	no	circRNA	STARD13, partial [Cervus elaphus hippelaphus]
circRNA2626	2.61663	up	0.0801867	1	no	intergenic	NA
circRNA7006	-inf	down	0.080233	1	no	intergenic	NA
circRNA6281	-inf	down	0.0806508	1	no	circRNA	TTC1, partial [Cervus elaphus hippelaphus]
circRNA389	inf	up	0.0809505	1	no	circRNA	IFRD1 [Cervus elaphus hippelaphus]
circRNA6780	-inf	down	0.0811252	1	no	intergenic	NA
circRNA6562	-inf	down	0.0811994	1	no	intergenic	NA
circRNA5539	-3.04432	down	0.0821884	1	no	intergenic	NA
circRNA6754	-inf	down	0.0821921	1	no	intergenic	NA
circRNA1381	2.30253	up	0.0823497	1	no	intergenic	NA
circRNA2710	inf	up	0.082715	1	no	intergenic	NA
circRNA5506	-2.60874	down	0.0830274	1	no	intergenic	NA
circRNA1875	2.92831	up	0.0846015	1	no	intergenic	NA
circRNA2507	inf	up	0.0854647	1	no	intergenic	NA
circRNA1970	inf	up	0.0856189	1	no	intergenic	NA
circRNA2522	inf	up	0.0857081	1	no	intergenic	NA
circRNA2363	inf	up	0.0860827	1	no	intergenic	NA
circRNA2305	inf	up	0.086752	1	no	intergenic	NA
circRNA248	-1.88231	down	0.0868124	1	no	circRNA	hypothetical protein Celaphus_00006375 [Cervus elaphus hippelaphus]
circRNA3092	inf	up	0.0869215	1	no	circRNA	DSTYK [Cervus elaphus hippelaphus]
circRNA3147	1.72036	up	0.0874391	1	no	circRNA	hypothetical protein Celaphus_00017321, partial [Cervus elaphus hippelaphus]
circRNA4197	inf	up	0.0903567	1	no	intergenic	NA
circRNA2171	1.86078	up	0.090817	1	no	intergenic	NA
circRNA2819	-1.1449	down	0.0926828	1	no	intergenic	NA
circRNA1588	1.84638	up	0.0926965	1	no	intergenic	NA
circRNA2885	inf	up	0.0927451	1	no	intergenic	NA
circRNA1322	2.61916	up	0.09285	1	no	intergenic	NA
circRNA3109	inf	up	0.0930969	1	no	circRNA	COL1A1 [Cervus elaphus hippelaphus]
circRNA3150	-2.05635	down	0.0939426	1	no	circRNA	hypothetical protein Celaphus_00003108 [Cervus elaphus hippelaphus]
circRNA5057	-2.61998	down	0.0939538	1	no	circRNA	collagen alpha-2(V) chain isoform X1 [Odocoileus virginianus texanus]
circRNA2256	1.00713	up	0.0941696	1	no	intergenic	NA
circRNA1152	-1.01785	down	0.0944444	1	no	circRNA	USP22, partial [Cervus elaphus hippelaphus]
circRNA895	2.78841	up	0.0945044	1	no	circRNA	COG3 [Cervus elaphus hippelaphus]
circRNA6925	-inf	down	0.0950366	1	no	intergenic	NA
circRNA1328	2.84494	up	0.096367	1	no	intergenic	NA
circRNA2342	3.10585	up	0.0973414	1	no	intergenic	NA
circRNA1453	inf	up	0.0973454	1	no	intergenic	NA
circRNA4385	inf	up	0.0978327	1	no	intergenic	NA
circRNA5117	-3.14421	down	0.0978379	1	no	intergenic	NA
circRNA1171	-2.99083	down	0.0980297	1	no	circRNA	RRM2 [Cervus elaphus hippelaphus]
circRNA4362	inf	up	0.0985422	1	no	intergenic	NA
circRNA3079	-1.194	down	0.0994178	1	no	intergenic	NA
circRNA2554	inf	up	0.0995708	1	no	intergenic	NA
ciRNA671	-2.37519	down	0.100044	1	no	ciRNA	RARS, partial [Cervus elaphus hippelaphus]
circRNA4371	inf	up	0.100079	1	no	intergenic	NA
circRNA7684	-inf	down	0.100554	1	no	intergenic	NA
circRNA2490	inf	up	0.100568	1	no	intergenic	NA
circRNA2673	inf	up	0.100739	1	no	intergenic	NA
circRNA203	1.37879	up	0.101454	1	no	circRNA	TGFBRAP1 [Cervus elaphus hippelaphus]
circRNA826	1.00717	up	0.10215	1	no	circRNA	hypothetical protein Celaphus_00004550 [Cervus elaphus hippelaphus]
circRNA439	-1.00521	down	0.102439	1	no	circRNA	transforming growth factor beta-2, partial [Odocoileus virginianus texanus]
circRNA2692	-1.2016	down	0.10397	1	no	intergenic	NA
circRNA1987	inf	up	0.105007	1	no	intergenic	NA
circRNA2373	1.0112	up	0.105745	1	no	intergenic	NA
circRNA543	2.83558	up	0.107071	1	no	circRNA	COL1A1 [Cervus elaphus hippelaphus]
circRNA3126	1.03479	up	0.107572	1	no	circRNA	hypothetical protein Celaphus_00013041, partial [Cervus elaphus hippelaphus]
circRNA1414	-2.68181	down	0.107614	1	no	intergenic	NA
circRNA993	inf	up	0.108105	1	no	circRNA	collagen alpha-1(II) chain isoform X2 [Odocoileus virginianus texanus]
circRNA6876	-inf	down	0.108958	1	no	intergenic	NA
circRNA2012	inf	up	0.109151	1	no	intergenic	NA
ciRNA205	1.08065	up	0.109356	1	no	ciRNA	hypothetical protein Celaphus_00017367, partial [Cervus elaphus hippelaphus]
circRNA7767	-inf	down	0.109913	1	no	intergenic	NA
circRNA3080	-1.10439	down	0.110094	1	no	intergenic	NA
circRNA1869	inf	up	0.110842	1	no	intergenic	NA
circRNA1618	inf	up	0.11085	1	no	intergenic	NA
circRNA1528	1.05283	up	0.112007	1	no	intergenic	NA
circRNA6626	-inf	down	0.113078	1	no	intergenic	NA
circRNA2961	1.60332	up	0.11396	1	no	intergenic	NA
circRNA2873	-1.0216	down	0.114643	1	no	intergenic	NA
ciRNA147	1.02696	up	0.114989	1	no	ciRNA	hypothetical protein Celaphus_00006606 [Cervus elaphus hippelaphus]
circRNA440	-0.947952	down	0.115478	1	no	circRNA	transforming growth factor beta-2, partial [Odocoileus virginianus texanus]
circRNA1715	inf	up	0.117002	1	no	intergenic	NA
circRNA4368	inf	up	0.117193	1	no	intergenic	NA
circRNA6916	-inf	down	0.117301	1	no	intergenic	NA
circRNA4304	inf	up	0.117332	1	no	intergenic	NA
ciRNA625	-1.89502	down	0.117519	1	no	ciRNA	kinesin-like protein KIF23 isoform X1 [Odocoileus virginianus texanus]
ciRNA847	-inf	down	0.117568	1	no	ciRNA	PPP3CB [Cervus elaphus hippelaphus]
circRNA3084	-1.14491	down	0.117629	1	no	intergenic	NA
circRNA4165	inf	up	0.117648	1	no	intergenic	NA
circRNA3986	inf	up	0.117944	1	no	intergenic	NA
circRNA3639	inf	up	0.118231	1	no	circRNA	PREDICTED: astrocytic phosphoprotein PEA-15 [Camelus dromedarius]
circRNA2239	0.905328	up	0.11874	1	no	intergenic	NA
circRNA865	2.51915	up	0.118819	1	no	circRNA	SOBP, partial [Cervus elaphus hippelaphus]
circRNA6165	-inf	down	0.120395	1	no	circRNA	NOD1, partial [Cervus elaphus hippelaphus]
circRNA3584	-3.47672	down	0.120649	1	no	circRNA	ZDHHC20 [Cervus elaphus hippelaphus]
circRNA1863	inf	up	0.122772	1	no	intergenic	NA
circRNA285	-2.88116	down	0.123263	1	no	circRNA	PTPN9 [Cervus elaphus hippelaphus]
circRNA1085	1.91362	up	0.123509	1	no	circRNA	E3 ubiquitin-protein transferase RMND5A isoform X1 [Ursus arctos horribilis]
circRNA2738	1.79142	up	0.123582	1	no	intergenic	NA
ciRNA77	inf	up	0.123708	1	no	ciRNA	hypothetical protein Celaphus_00015592 [Cervus elaphus hippelaphus]
circRNA267	inf	up	0.124104	1	no	circRNA	ACAN [Cervus elaphus hippelaphus]
circRNA1560	1.81237	up	0.124207	1	no	intergenic	NA
circRNA424	1.29395	up	0.124538	1	no	circRNA	TRIM21, partial [Cervus elaphus hippelaphus]
circRNA4098	-2.81477	down	0.124588	1	no	intergenic	NA
circRNA2506	1.46779	up	0.124662	1	no	intergenic	NA
circRNA5681	-1.95226	down	0.124927	1	no	intergenic	NA
circRNA2972	2.04585	up	0.125257	1	no	intergenic	NA
circRNA2142	inf	up	0.125309	1	no	intergenic	NA
circRNA6758	-inf	down	0.125602	1	no	intergenic	NA
circRNA4201	-2.06042	down	0.126162	1	no	intergenic	NA
circRNA2654	inf	up	0.127294	1	no	intergenic	NA
circRNA1445	1.4366	up	0.127882	1	no	intergenic	NA
circRNA1423	1.46592	up	0.12824	1	no	intergenic	NA
circRNA7624	-inf	down	0.128456	1	no	intergenic	NA
ciRNA856	-inf	down	0.128589	1	no	ciRNA	POLB [Cervus elaphus hippelaphus]
circRNA1960	-0.870388	down	0.128819	1	no	intergenic	NA
ciRNA296	-1.29385	down	0.130463	1	no	ciRNA	hypothetical protein Celaphus_00001338 [Cervus elaphus hippelaphus]
circRNA4058	-1.84537	down	0.130558	1	no	intergenic	NA
circRNA5717	-1.7809	down	0.131025	1	no	intergenic	NA
circRNA7066	-inf	down	0.131127	1	no	intergenic	NA
circRNA6712	-inf	down	0.131283	1	no	intergenic	NA
ciRNA248	inf	up	0.131447	1	no	ciRNA	UBR4 [Cervus elaphus hippelaphus]
circRNA578	-0.945304	down	0.131513	1	no	circRNA	SMARCA4 [Cervus elaphus hippelaphus]
ciRNA849	-inf	down	0.131648	1	no	ciRNA	PDGFD, partial [Cervus elaphus hippelaphus]
circRNA6483	-inf	down	0.131683	1	no	circRNA	TMEM120B [Cervus elaphus hippelaphus]
circRNA7024	-inf	down	0.13175	1	no	intergenic	NA
circRNA7139	-inf	down	0.131816	1	no	circRNA	COQ2, partial [Cervus elaphus hippelaphus]
circRNA6215	-inf	down	0.132028	1	no	circRNA	BRAP [Cervus elaphus hippelaphus]
circRNA2917	inf	up	0.13277	1	no	intergenic	NA
circRNA1059	inf	up	0.132894	1	no	circRNA	TLL1, partial [Cervus elaphus hippelaphus]
circRNA1099	2.36045	up	0.13318	1	no	circRNA	MICOS complex subunit MIC60 isoform X5 [Odocoileus virginianus texanus]
circRNA2019	1.74077	up	0.133462	1	no	intergenic	NA
circRNA7046	-inf	down	0.134449	1	no	intergenic	NA
circRNA352	-3.65476	down	0.134524	1	no	circRNA	MED17 [Cervus elaphus hippelaphus]
circRNA2977	1.6444	up	0.13463	1	no	intergenic	NA
circRNA6472	-inf	down	0.134688	1	no	circRNA	ASAP3 [Cervus elaphus hippelaphus]
circRNA6788	-inf	down	0.134743	1	no	intergenic	NA
circRNA2119	2.3183	up	0.136348	1	no	intergenic	NA
circRNA2689	1.63207	up	0.136741	1	no	intergenic	NA
circRNA270	2.36235	up	0.136764	1	no	circRNA	hypothetical protein Celaphus_00015232 [Cervus elaphus hippelaphus]
circRNA2739	1.55786	up	0.13744	1	no	intergenic	NA
circRNA1224	inf	up	0.139655	1	no	intergenic	NA
circRNA2087	-2.87007	down	0.139664	1	no	intergenic	NA
circRNA4256	inf	up	0.140044	1	no	intergenic	NA
ciRNA392	inf	up	0.140226	1	no	ciRNA	HCFC1R1 [Cervus elaphus hippelaphus]
circRNA2611	-1.46939	down	0.140467	1	no	intergenic	NA
circRNA6883	-inf	down	0.140511	1	no	intergenic	NA
circRNA3879	inf	up	0.140888	1	no	intergenic	NA
circRNA2521	1.51915	up	0.141096	1	no	intergenic	NA
circRNA6502	-inf	down	0.141177	1	no	circRNA	PMM2 [Cervus elaphus hippelaphus]
circRNA625	-2.50699	down	0.141531	1	no	circRNA	hypothetical protein Celaphus_00001739 [Cervus elaphus hippelaphus]
circRNA5696	-2.81961	down	0.141725	1	no	intergenic	NA
circRNA2240	2.76441	up	0.14187	1	no	intergenic	NA
circRNA1259	1.01457	up	0.142233	1	no	intergenic	NA
circRNA2085	0.89461	up	0.142549	1	no	intergenic	NA
ciRNA450	inf	up	0.142612	1	no	ciRNA	hypothetical protein Celaphus_00012636 [Cervus elaphus hippelaphus]
circRNA3663	inf	up	0.142731	1	no	circRNA	PREDICTED: protein-methionine sulfoxide oxidase MICAL3 isoform X10 [Capra hircus]
circRNA3917	inf	up	0.142847	1	no	intergenic	NA
circRNA1353	-1.35916	down	0.143187	1	no	intergenic	NA
circRNA3171	-2.25881	down	0.143221	1	no	circRNA	PIGN [Cervus elaphus hippelaphus]
circRNA2009	inf	up	0.143826	1	no	intergenic	NA
circRNA2867	-1.06986	down	0.144251	1	no	intergenic	NA
circRNA2277	inf	up	0.144261	1	no	intergenic	NA
circRNA1476	-2.21275	down	0.14477	1	no	intergenic	NA
circRNA4804	-2.43718	down	0.144796	1	no	circRNA	ubiquitin carboxyl-terminal hydrolase 40 isoform X1 [Odocoileus virginianus texanus]
circRNA6619	-inf	down	0.145042	1	no	intergenic	NA
circRNA6749	-inf	down	0.14505	1	no	intergenic	NA
circRNA357	3.26177	up	0.145491	1	no	circRNA	hypothetical protein Celaphus_00006853, partial [Cervus elaphus hippelaphus]
circRNA4040	-1.76928	down	0.145535	1	no	intergenic	NA
circRNA3618	inf	up	0.146147	1	no	circRNA	PSMA1, partial [Cervus elaphus hippelaphus]
circRNA2902	inf	up	0.146539	1	no	intergenic	NA
circRNA4258	inf	up	0.147022	1	no	intergenic	NA
circRNA4225	inf	up	0.147064	1	no	intergenic	NA
circRNA1949	1.37413	up	0.147167	1	no	intergenic	NA
circRNA1820	2.63979	up	0.147429	1	no	intergenic	NA
circRNA2169	2.63979	up	0.147489	1	no	intergenic	NA
ciRNA250	-1.47995	down	0.147653	1	no	ciRNA	exocyst complex component 5 [Bos taurus]
circRNA1223	-1.64545	down	0.14831	1	no	intergenic	NA
circRNA2125	2.33096	up	0.149004	1	no	intergenic	NA
circRNA3119	0.815483	up	0.149105	1	no	circRNA	ubiquitin-conjugating enzyme E2 D1 isoform 2 [Homo sapiens]
circRNA3933	-2.17975	down	0.149239	1	no	intergenic	NA
circRNA7620	-inf	down	0.149876	1	no	intergenic	NA
circRNA5380	-2.81488	down	0.150752	1	no	intergenic	NA
circRNA73	2.79994	up	0.151445	1	no	circRNA	PREDICTED: EGF domain-specific O-linked N-acetylglucosamine transferase [Capra hircus]
circRNA980	-0.858309	down	0.152777	1	no	circRNA	hypothetical protein Celaphus_00008632, partial [Cervus elaphus hippelaphus]
circRNA2132	-1.40327	down	0.153357	1	no	intergenic	NA
circRNA6485	-inf	down	0.153488	1	no	circRNA	LRRC40 [Cervus elaphus hippelaphus]
circRNA1482	2.43033	up	0.154422	1	no	intergenic	NA
circRNA5664	-1.76337	down	0.154604	1	no	intergenic	NA
circRNA843	2.34497	up	0.154857	1	no	circRNA	TGS1 [Cervus elaphus hippelaphus]
circRNA6550	-inf	down	0.155047	1	no	intergenic	NA
circRNA6805	-inf	down	0.155082	1	no	intergenic	NA
circRNA3973	-1.56746	down	0.155894	1	no	intergenic	NA
circRNA293	inf	up	0.156508	1	no	circRNA	protein transport protein Sec23A [Ovis aries]
circRNA6068	-inf	down	0.156572	1	no	circRNA	NBAS [Cervus elaphus hippelaphus]
ciRNA786	-inf	down	0.15666	1	no	ciRNA	hypothetical protein Celaphus_00018532, partial [Cervus elaphus hippelaphus]
circRNA743	1.30809	up	0.157469	1	no	circRNA	SMC4 [Cervus elaphus hippelaphus]
circRNA2876	2.64722	up	0.157557	1	no	intergenic	NA
circRNA896	1.6273	up	0.158142	1	no	circRNA	integral membrane protein 2B [Odocoileus virginianus texanus]
circRNA296	inf	up	0.158223	1	no	circRNA	CTAGE5, partial [Cervus elaphus hippelaphus]
circRNA2404	inf	up	0.158229	1	no	intergenic	NA
circRNA7020	-inf	down	0.158245	1	no	intergenic	NA
circRNA1334	inf	up	0.158437	1	no	intergenic	NA
circRNA726	inf	up	0.158622	1	no	circRNA	hypothetical protein Celaphus_00012711 [Cervus elaphus hippelaphus]
ciRNA883	-inf	down	0.158661	1	no	ciRNA	CACNA1D, partial [Cervus elaphus hippelaphus]
circRNA1272	inf	up	0.15867	1	no	intergenic	NA
circRNA2996	1.45393	up	0.158829	1	no	intergenic	NA
circRNA2353	1.69249	up	0.159592	1	no	intergenic	NA
circRNA611	-1.91598	down	0.159647	1	no	circRNA	hypothetical protein Celaphus_00017321, partial [Cervus elaphus hippelaphus]
circRNA7083	-inf	down	0.160323	1	no	intergenic	NA
circRNA46	1.84688	up	0.16054	1	no	circRNA	TM9SF4, partial [Cervus elaphus hippelaphus]
circRNA6893	-inf	down	0.160693	1	no	intergenic	NA
circRNA6829	-inf	down	0.160916	1	no	intergenic	NA
circRNA1633	-0.823125	down	0.161421	1	no	intergenic	NA
circRNA2613	2.26559	up	0.163274	1	no	intergenic	NA
circRNA1544	-1.4321	down	0.163818	1	no	intergenic	NA
circRNA2595	-1.1963	down	0.163877	1	no	intergenic	NA
circRNA2586	1.3311	up	0.164007	1	no	intergenic	NA
circRNA3066	inf	up	0.164672	1	no	intergenic	NA
circRNA337	2.30538	up	0.165306	1	no	circRNA	hypothetical protein Celaphus_00013471 [Cervus elaphus hippelaphus]
circRNA2604	1.40269	up	0.165482	1	no	intergenic	NA
circRNA3172	inf	up	0.166977	1	no	circRNA	RAD52 [Cervus elaphus hippelaphus]
circRNA1422	inf	up	0.167239	1	no	intergenic	NA
circRNA2466	-1.07656	down	0.167265	1	no	intergenic	NA
circRNA6612	-inf	down	0.167732	1	no	intergenic	NA
circRNA6461	-inf	down	0.167847	1	no	circRNA	USP45 [Cervus elaphus hippelaphus]
circRNA2747	inf	up	0.168397	1	no	intergenic	NA
circRNA87	inf	up	0.168502	1	no	circRNA	hypothetical protein Celaphus_00010662 [Cervus elaphus hippelaphus]
circRNA7524	-inf	down	0.168782	1	no	intergenic	NA
circRNA2329	-1.42335	down	0.170786	1	no	intergenic	NA
circRNA1075	0.963953	up	0.171326	1	no	circRNA	EXOC1 [Cervus elaphus hippelaphus]
circRNA7062	-inf	down	0.171949	1	no	intergenic	NA
circRNA7000	-inf	down	0.171988	1	no	intergenic	NA
circRNA6947	-inf	down	0.172066	1	no	intergenic	NA
ciRNA647	-2.79017	down	0.172093	1	no	ciRNA	GTF2I, partial [Cervus elaphus hippelaphus]
circRNA498	-0.871469	down	0.172211	1	no	circRNA	ATP6V0A2 [Cervus elaphus hippelaphus]
circRNA2184	-1.63332	down	0.172494	1	no	intergenic	NA
circRNA3082	0.637509	up	0.173277	1	no	intergenic	NA
circRNA2763	2.06451	up	0.173442	1	no	intergenic	NA
circRNA6654	-inf	down	0.173637	1	no	intergenic	NA
circRNA4129	inf	up	0.173647	1	no	intergenic	NA
circRNA6771	-inf	down	0.173658	1	no	intergenic	NA
circRNA569	0.738707	up	0.173819	1	no	circRNA	hypothetical protein Celaphus_00002941 [Cervus elaphus hippelaphus]
circRNA2435	inf	up	0.174113	1	no	intergenic	NA
circRNA3835	inf	up	0.174391	1	no	intergenic	NA
ciRNA26	1.14533	up	0.1745	1	no	ciRNA	HCFC1R1 [Cervus elaphus hippelaphus]
circRNA3729	-1.49859	down	0.174549	1	no	intergenic	NA
circRNA7549	-inf	down	0.17512	1	no	intergenic	NA
circRNA902	-1.18185	down	0.175225	1	no	circRNA	POSTN [Cervus elaphus hippelaphus]
circRNA6539	-inf	down	0.175577	1	no	intergenic	NA
circRNA6738	-inf	down	0.17567	1	no	intergenic	NA
ciRNA863	-inf	down	0.175736	1	no	ciRNA	MED15 [Cervus elaphus hippelaphus]
circRNA6684	-inf	down	0.175738	1	no	intergenic	NA
circRNA2014	inf	up	0.176074	1	no	intergenic	NA
circRNA102	-2.27073	down	0.176215	1	no	circRNA	PREDICTED: splicing factor 3B subunit 1 isoform X3 [Fukomys damarensis]
circRNA2005	inf	up	0.176272	1	no	intergenic	NA
circRNA3189	-1.13291	down	0.176314	1	no	circRNA	COL12A1 [Cervus elaphus hippelaphus]
circRNA6765	-inf	down	0.176764	1	no	intergenic	NA
circRNA2340	3.00109	up	0.177038	1	no	intergenic	NA
circRNA7136	-inf	down	0.177088	1	no	circRNA	SLC35B4 [Cervus elaphus hippelaphus]
ciRNA102	0.82106	up	0.177672	1	no	ciRNA	TBC1D12 [Cervus elaphus hippelaphus]
circRNA6218	-inf	down	0.177754	1	no	circRNA	SCARB1 [Cervus elaphus hippelaphus]
circRNA5006	-3.11457	down	0.177965	1	no	circRNA	PRRC2C, partial [Cervus elaphus hippelaphus]
circRNA4259	inf	up	0.178404	1	no	intergenic	NA
circRNA1069	-0.976929	down	0.178433	1	no	circRNA	TIPIN [Cervus elaphus hippelaphus]
circRNA1872	inf	up	0.178441	1	no	intergenic	NA
circRNA4003	inf	up	0.178607	1	no	intergenic	NA
circRNA3918	inf	up	0.178671	1	no	intergenic	NA
circRNA2643	inf	up	0.178704	1	no	intergenic	NA
circRNA1611	inf	up	0.179053	1	no	intergenic	NA
ciRNA221	inf	up	0.179343	1	no	ciRNA	hypothetical protein Celaphus_00003730 [Cervus elaphus hippelaphus]
circRNA6690	-inf	down	0.17936	1	no	intergenic	NA
ciRNA813	-inf	down	0.179549	1	no	ciRNA	POSTN [Cervus elaphus hippelaphus]
circRNA7781	-inf	down	0.180081	1	no	intergenic	NA
circRNA2935	0.727542	up	0.18012	1	no	intergenic	NA
circRNA7588	-inf	down	0.180203	1	no	intergenic	NA
circRNA3018	-1.55221	down	0.180566	1	no	intergenic	NA
circRNA3750	-1.50044	down	0.180896	1	no	intergenic	NA
circRNA617	1.78355	up	0.181002	1	no	circRNA	hypothetical protein Celaphus_00017417, partial [Cervus elaphus hippelaphus]
circRNA1314	inf	up	0.181031	1	no	intergenic	NA
circRNA6351	-inf	down	0.182423	1	no	circRNA	PLCL2, partial [Cervus elaphus hippelaphus]
circRNA1538	-1.07982	down	0.182589	1	no	intergenic	NA
circRNA6463	-inf	down	0.183267	1	no	circRNA	hypothetical protein Celaphus_00004481, partial [Cervus elaphus hippelaphus]
circRNA815	-1.0237	down	0.183558	1	no	circRNA	UTP4 [Cervus elaphus hippelaphus]
circRNA2849	2.53265	up	0.183897	1	no	intergenic	NA
circRNA5158	-1.49712	down	0.185119	1	no	intergenic	NA
circRNA2052	-2.66612	down	0.185216	1	no	intergenic	NA
circRNA4090	-1.84625	down	0.185515	1	no	intergenic	NA
circRNA5946	-1.9737	down	0.186549	1	no	circRNA	COL1A1 [Cervus elaphus hippelaphus]
circRNA1720	1.36162	up	0.187227	1	no	intergenic	NA
circRNA689	0.68857	up	0.187449	1	no	circRNA	hypothetical protein Celaphus_00014792, partial [Cervus elaphus hippelaphus]
circRNA1681	inf	up	0.18785	1	no	intergenic	NA
circRNA3070	2.17133	up	0.189032	1	no	intergenic	NA
circRNA6881	-inf	down	0.189075	1	no	intergenic	NA
circRNA914	-0.868343	down	0.189826	1	no	circRNA	hypothetical protein Celaphus_00016793 [Cervus elaphus hippelaphus]
circRNA13	0.977639	up	0.192049	1	no	circRNA	hypothetical protein Celaphus_00013851 [Cervus elaphus hippelaphus]
circRNA6734	-inf	down	0.192161	1	no	intergenic	NA
circRNA3136	2.5188	up	0.192284	1	no	circRNA	PLEKHA1 [Cervus elaphus hippelaphus]
circRNA6512	-inf	down	0.192408	1	no	circRNA	hypothetical protein Celaphus_00005466 [Cervus elaphus hippelaphus]
circRNA1669	2.507	up	0.192536	1	no	intergenic	NA
ciRNA885	-inf	down	0.192547	1	no	ciRNA	hypothetical protein Celaphus_00012946 [Cervus elaphus hippelaphus]
ciRNA255	1.70214	up	0.192679	1	no	ciRNA	HEATR1 [Cervus elaphus hippelaphus]
circRNA1936	inf	up	0.192706	1	no	intergenic	NA
circRNA2750	inf	up	0.192875	1	no	intergenic	NA
circRNA3049	inf	up	0.193036	1	no	intergenic	NA
circRNA3112	1.40295	up	0.1931	1	no	circRNA	hypothetical protein Celaphus_00017325, partial [Cervus elaphus hippelaphus]
circRNA1008	-0.775454	down	0.193124	1	no	circRNA	PREDICTED: nucleoporin NUP53 [Equus przewalskii]
ciRNA841	-inf	down	0.193503	1	no	ciRNA	ADAM10, partial [Cervus elaphus hippelaphus]
circRNA1108	2.99568	up	0.193713	1	no	circRNA	FBXO11 [Cervus elaphus hippelaphus]
circRNA2371	2.46175	up	0.194133	1	no	intergenic	NA
circRNA1460	2.6017	up	0.19487	1	no	intergenic	NA
ciRNA247	-0.778848	down	0.196102	1	no	ciRNA	hypothetical protein Celaphus_00005853, partial [Cervus elaphus hippelaphus]
circRNA3614	-2.01592	down	0.196272	1	no	circRNA	hypothetical protein Celaphus_00016273 [Cervus elaphus hippelaphus]
ciRNA352	inf	up	0.196285	1	no	ciRNA	hypothetical protein Celaphus_00011632 [Cervus elaphus hippelaphus]
circRNA1399	inf	up	0.196424	1	no	intergenic	NA
circRNA860	inf	up	0.196487	1	no	circRNA	COL12A1 [Cervus elaphus hippelaphus]
circRNA3137	inf	up	0.196546	1	no	circRNA	MSH2 [Cervus elaphus hippelaphus]
circRNA2314	-1.26367	down	0.197072	1	no	intergenic	NA
circRNA2222	2.66505	up	0.197182	1	no	intergenic	NA
ciRNA626	-1.56989	down	0.197854	1	no	ciRNA	kinesin-like protein KIF23 isoform X1 [Odocoileus virginianus texanus]
circRNA2766	0.738503	up	0.197866	1	no	intergenic	NA
circRNA3409	-3.30698	down	0.197971	1	no	circRNA	OTUD4 [Cervus elaphus hippelaphus]
circRNA7679	-inf	down	0.198844	1	no	intergenic	NA
circRNA1941	inf	up	0.198983	1	no	intergenic	NA
circRNA397	-1.09936	down	0.199003	1	no	circRNA	TNPO3 [Cervus elaphus hippelaphus]
circRNA4048	-1.30343	down	0.199436	1	no	intergenic	NA
circRNA1654	inf	up	0.200272	1	no	intergenic	NA
circRNA931	1.99009	up	0.200837	1	no	circRNA	MYO10 [Cervus elaphus hippelaphus]
circRNA1859	inf	up	0.201164	1	no	intergenic	NA
circRNA1312	inf	up	0.201582	1	no	intergenic	NA
circRNA6459	-inf	down	0.201733	1	no	circRNA	hypothetical protein Celaphus_00011038 [Cervus elaphus hippelaphus]
circRNA3838	inf	up	0.201863	1	no	intergenic	NA
circRNA4219	inf	up	0.201946	1	no	intergenic	NA
circRNA4257	inf	up	0.201995	1	no	intergenic	NA
circRNA2216	1.39002	up	0.202335	1	no	intergenic	NA
circRNA2913	inf	up	0.202392	1	no	intergenic	NA
circRNA3699	inf	up	0.202826	1	no	intergenic	NA
circRNA4357	inf	up	0.202895	1	no	intergenic	NA
circRNA3858	inf	up	0.202939	1	no	intergenic	NA
circRNA6023	-inf	down	0.203041	1	no	circRNA	DCP1A [Cervus elaphus hippelaphus]
circRNA749	2.39609	up	0.203093	1	no	circRNA	TOMM70 [Cervus elaphus hippelaphus]
circRNA3672	inf	up	0.203187	1	no	circRNA	hypothetical protein Celaphus_00018547 [Cervus elaphus hippelaphus]
circRNA3204	inf	up	0.203354	1	no	circRNA	hypothetical protein Celaphus_00013851 [Cervus elaphus hippelaphus]
ciRNA203	-1.13505	down	0.204194	1	no	ciRNA	ZCCHC8 [Cervus elaphus hippelaphus]
circRNA859	0.766796	up	0.204292	1	no	circRNA	COL12A1 [Cervus elaphus hippelaphus]
circRNA2155	-0.863837	down	0.204574	1	no	intergenic	NA
circRNA830	0.858837	up	0.204695	1	no	circRNA	hypothetical protein Celaphus_00004656 [Cervus elaphus hippelaphus]
circRNA3120	1.20674	up	0.205411	1	no	circRNA	CFLAR [Cervus elaphus hippelaphus]
circRNA1580	-1.20987	down	0.205429	1	no	intergenic	NA
circRNA6892	-inf	down	0.205463	1	no	intergenic	NA
circRNA7034	-inf	down	0.205584	1	no	intergenic	NA
circRNA6715	-inf	down	0.206003	1	no	intergenic	NA
circRNA6489	-inf	down	0.206051	1	no	circRNA	TRAM1, partial [Cervus elaphus hippelaphus]
circRNA3705	-2.58881	down	0.206445	1	no	intergenic	NA
circRNA2304	1.32581	up	0.206489	1	no	intergenic	NA
ciRNA245	2.51501	up	0.207689	1	no	ciRNA	SEC31A, partial [Cervus elaphus hippelaphus]
circRNA40	inf	up	0.208096	1	no	circRNA	vacuolar protein sorting-associated protein 16 homolog isoform X1 [Delphinapterus leucas]
circRNA2530	inf	up	0.209413	1	no	intergenic	NA
circRNA1514	1.88892	up	0.209448	1	no	intergenic	NA
circRNA413	inf	up	0.209634	1	no	circRNA	hypothetical protein Celaphus_00008947 [Cervus elaphus hippelaphus]
circRNA1246	inf	up	0.2097	1	no	intergenic	NA
circRNA7863	-inf	down	0.209825	1	no	intergenic	NA
circRNA3071	inf	up	0.20983	1	no	intergenic	NA
ciRNA151	inf	up	0.210121	1	no	ciRNA	KNTC1 [Cervus elaphus hippelaphus]
circRNA6156	-inf	down	0.210391	1	no	circRNA	hypothetical protein Celaphus_00007166 [Cervus elaphus hippelaphus]
circRNA1462	-1.65591	down	0.210731	1	no	intergenic	NA
circRNA1783	-1.22217	down	0.211182	1	no	intergenic	NA
circRNA1341	-2.64774	down	0.211243	1	no	intergenic	NA
circRNA2283	1.43104	up	0.212187	1	no	intergenic	NA
circRNA1492	inf	up	0.213028	1	no	intergenic	NA
circRNA1333	inf	up	0.213236	1	no	intergenic	NA
circRNA351	3.41045	up	0.213614	1	no	circRNA	MED17 [Cervus elaphus hippelaphus]
circRNA3111	1.33192	up	0.213695	1	no	circRNA	AF4/FMR2 family member 4 [Odocoileus virginianus texanus]
ciRNA297	1.10894	up	0.214247	1	no	ciRNA	SOX6 [Cervus elaphus hippelaphus]
circRNA5707	-1.96242	down	0.214424	1	no	intergenic	NA
circRNA1469	-1.36893	down	0.214645	1	no	intergenic	NA
circRNA303	1.05533	up	0.214776	1	no	circRNA	hypothetical protein Celaphus_00015534, partial [Cervus elaphus hippelaphus]
ciRNA85	-1.2838	down	0.214961	1	no	ciRNA	hypothetical protein Celaphus_00012143 [Cervus elaphus hippelaphus]
circRNA3961	-1.81955	down	0.215792	1	no	intergenic	NA
circRNA6309	-inf	down	0.215797	1	no	circRNA	PLPP3 [Cervus elaphus hippelaphus]
ciRNA225	0.866463	up	0.216378	1	no	ciRNA	N-acetylgalactosaminyltransferase 7 [Pteropus alecto]
circRNA1623	-1.41025	down	0.216472	1	no	intergenic	NA
circRNA1732	1.93904	up	0.216625	1	no	intergenic	NA
circRNA1117	-1.92129	down	0.217306	1	no	circRNA	guanine nucleotide binding protein, beta 1, isoform CRA_a, partial [Mus musculus]
circRNA3083	-0.796287	down	0.218344	1	no	intergenic	NA
circRNA2916	-1.50487	down	0.218377	1	no	intergenic	NA
circRNA7824	-inf	down	0.218644	1	no	intergenic	NA
circRNA7656	-inf	down	0.218713	1	no	intergenic	NA
circRNA5751	-2.49436	down	0.220546	1	no	intergenic	NA
circRNA2067	-1.4944	down	0.220592	1	no	intergenic	NA
circRNA5071	-2.49436	down	0.220598	1	no	circRNA	SLIT2, partial [Cervus elaphus hippelaphus]
ciRNA700	-2.56915	down	0.220606	1	no	ciRNA	hypothetical protein Celaphus_00003941 [Cervus elaphus hippelaphus]
circRNA71	-2.40122	down	0.220702	1	no	circRNA	RAD18 [Cervus elaphus hippelaphus]
ciRNA323	1.60288	up	0.220956	1	no	ciRNA	hypothetical protein Celaphus_00007908 [Cervus elaphus hippelaphus]
circRNA1577	-0.950329	down	0.221589	1	no	intergenic	NA
circRNA2936	0.706579	up	0.221656	1	no	intergenic	NA
circRNA5101	-1.57153	down	0.221905	1	no	intergenic	NA
circRNA2769	2.83811	up	0.222245	1	no	intergenic	NA
circRNA2199	-0.974689	down	0.223034	1	no	intergenic	NA
ciRNA139	-0.919629	down	0.223352	1	no	ciRNA	FBLIM1 [Cervus elaphus hippelaphus]
circRNA6601	-inf	down	0.2241	1	no	intergenic	NA
circRNA6659	-inf	down	0.224124	1	no	intergenic	NA
circRNA5023	-2.5583	down	0.224858	1	no	circRNA	KIF18B [Cervus elaphus hippelaphus]
circRNA6083	-inf	down	0.225269	1	no	circRNA	cytoplasmic dynein 2 light intermediate chain 1 [Odocoileus virginianus texanus]
circRNA6046	-inf	down	0.225432	1	no	circRNA	ARSE, partial [Cervus elaphus hippelaphus]
ciRNA816	-inf	down	0.225621	1	no	ciRNA	hypothetical protein Celaphus_00011094 [Cervus elaphus hippelaphus]
ciRNA866	-inf	down	0.225634	1	no	ciRNA	hypothetical protein Celaphus_00012663, partial [Cervus elaphus hippelaphus]
ciRNA887	-inf	down	0.225764	1	no	ciRNA	NDC80, partial [Cervus elaphus hippelaphus]
circRNA1509	inf	up	0.226085	1	no	intergenic	NA
circRNA428	1.43101	up	0.226108	1	no	circRNA	protein lin-7 homolog C [Loxodonta africana]
circRNA2410	inf	up	0.226178	1	no	intergenic	NA
circRNA1296	2.39892	up	0.226608	1	no	intergenic	NA
circRNA3013	inf	up	0.22662	1	no	intergenic	NA
circRNA3142	inf	up	0.226648	1	no	circRNA	SLC35B4 [Cervus elaphus hippelaphus]
ciRNA137	1.50843	up	0.226779	1	no	ciRNA	BIRC6, partial [Cervus elaphus hippelaphus]
circRNA313	inf	up	0.226986	1	no	circRNA	PTCHD4 [Cervus elaphus hippelaphus]
circRNA1466	-0.733586	down	0.227048	1	no	intergenic	NA
circRNA2854	inf	up	0.227098	1	no	intergenic	NA
circRNA2833	inf	up	0.227195	1	no	intergenic	NA
circRNA2826	inf	up	0.227488	1	no	intergenic	NA
circRNA2091	inf	up	0.227762	1	no	intergenic	NA
circRNA1868	2.01896	up	0.227785	1	no	intergenic	NA
circRNA1630	inf	up	0.227884	1	no	intergenic	NA
circRNA1278	inf	up	0.22836	1	no	intergenic	NA
circRNA1522	inf	up	0.22837	1	no	intergenic	NA
circRNA6900	-inf	down	0.22842	1	no	intergenic	NA
circRNA6769	-inf	down	0.228568	1	no	intergenic	NA
ciRNA117	inf	up	0.228583	1	no	ciRNA	hypothetical protein Celaphus_00007621 [Cervus elaphus hippelaphus]
circRNA6631	-inf	down	0.228894	1	no	intergenic	NA
circRNA2799	1.47434	up	0.228971	1	no	intergenic	NA
circRNA3901	inf	up	0.229053	1	no	intergenic	NA
circRNA6504	-inf	down	0.229092	1	no	circRNA	hypothetical protein Celaphus_00012663, partial [Cervus elaphus hippelaphus]
ciRNA882	-inf	down	0.229161	1	no	ciRNA	hypothetical protein Celaphus_00005247 [Cervus elaphus hippelaphus]
circRNA3905	inf	up	0.229164	1	no	intergenic	NA
circRNA6891	-inf	down	0.229186	1	no	intergenic	NA
circRNA3735	inf	up	0.229247	1	no	intergenic	NA
circRNA7058	-inf	down	0.229261	1	no	intergenic	NA
ciRNA167	-1.54403	down	0.230022	1	no	ciRNA	DCP2 [Cervus elaphus hippelaphus]
circRNA2286	0.646294	up	0.230024	1	no	intergenic	NA
circRNA5260	-2.86685	down	0.230669	1	no	intergenic	NA
circRNA5259	-2.93143	down	0.230865	1	no	intergenic	NA
circRNA2253	1.40756	up	0.231146	1	no	intergenic	NA
circRNA297	inf	up	0.231544	1	no	circRNA	PREDICTED: gamma-tubulin complex component 4 [Ceratotherium simum simum]
circRNA492	inf	up	0.231842	1	no	circRNA	hypothetical protein Celaphus_00000293 [Cervus elaphus hippelaphus]
circRNA6595	-inf	down	0.232689	1	no	intergenic	NA
circRNA6672	-inf	down	0.232797	1	no	intergenic	NA
circRNA6766	-inf	down	0.232904	1	no	intergenic	NA
circRNA2618	1.49822	up	0.233042	1	no	intergenic	NA
circRNA2564	0.765376	up	0.233143	1	no	intergenic	NA
circRNA7420	-inf	down	0.233299	1	no	circRNA	hypothetical protein Celaphus_00019418 [Cervus elaphus hippelaphus]
circRNA6144	-inf	down	0.233486	1	no	circRNA	FADS2 [Cervus elaphus hippelaphus]
circRNA5796	-2.86354	down	0.233822	1	no	intergenic	NA
circRNA6570	-inf	down	0.234395	1	no	intergenic	NA
ciRNA811	-inf	down	0.234499	1	no	ciRNA	GGNBP2 [Cervus elaphus hippelaphus]
circRNA6487	-inf	down	0.2347	1	no	circRNA	hypothetical protein Celaphus_00004456 [Cervus elaphus hippelaphus]
circRNA2919	1.08107	up	0.235098	1	no	intergenic	NA
circRNA2623	inf	up	0.235168	1	no	intergenic	NA
circRNA4026	inf	up	0.235416	1	no	intergenic	NA
circRNA25	inf	up	0.23547	1	no	circRNA	PPFIBP1, partial [Cervus elaphus hippelaphus]
circRNA3913	inf	up	0.235485	1	no	intergenic	NA
circRNA3796	inf	up	0.235555	1	no	intergenic	NA
circRNA3792	inf	up	0.2356	1	no	intergenic	NA
circRNA4381	inf	up	0.235617	1	no	intergenic	NA
circRNA2359	inf	up	0.235968	1	no	intergenic	NA
circRNA1585	inf	up	0.236065	1	no	intergenic	NA
circRNA7724	-inf	down	0.236212	1	no	intergenic	NA
circRNA5107	-1.88904	down	0.236228	1	no	intergenic	NA
circRNA924	0.659816	up	0.236378	1	no	circRNA	NADK2 [Cervus elaphus hippelaphus]
ciRNA966	-inf	down	0.236451	1	no	ciRNA	CRTAP [Cervus elaphus hippelaphus]
circRNA6709	-inf	down	0.236541	1	no	intergenic	NA
ciRNA827	-inf	down	0.236566	1	no	ciRNA	MMP16, partial [Cervus elaphus hippelaphus]
ciRNA209	-0.837457	down	0.236704	1	no	ciRNA	hypothetical protein Celaphus_00012168 [Cervus elaphus hippelaphus]
circRNA6981	-inf	down	0.236724	1	no	intergenic	NA
circRNA1876	inf	up	0.236962	1	no	intergenic	NA
circRNA2453	inf	up	0.236977	1	no	intergenic	NA
circRNA2309	2.46941	up	0.23705	1	no	intergenic	NA
circRNA2287	inf	up	0.237074	1	no	intergenic	NA
circRNA2352	inf	up	0.237083	1	no	intergenic	NA
circRNA2856	inf	up	0.237083	1	no	intergenic	NA
ciRNA902	-inf	down	0.237132	1	no	ciRNA	hypothetical protein Celaphus_00018546 [Cervus elaphus hippelaphus]
circRNA1954	1.08919	up	0.2372	1	no	intergenic	NA
circRNA1797	-0.802141	down	0.237954	1	no	intergenic	NA
circRNA5383	-1.53409	down	0.238045	1	no	intergenic	NA
circRNA4140	inf	up	0.238367	1	no	intergenic	NA
circRNA4356	inf	up	0.2385	1	no	intergenic	NA
circRNA4306	inf	up	0.23856	1	no	intergenic	NA
circRNA6991	-inf	down	0.238821	1	no	intergenic	NA
circRNA6563	-inf	down	0.238882	1	no	intergenic	NA
circRNA5533	-2.15437	down	0.238935	1	no	intergenic	NA
ciRNA291	2.46989	up	0.241317	1	no	ciRNA	hypothetical protein Celaphus_00008385, partial [Cervus elaphus hippelaphus]
circRNA2364	inf	up	0.241641	1	no	intergenic	NA
circRNA2751	inf	up	0.241813	1	no	intergenic	NA
circRNA2445	inf	up	0.241839	1	no	intergenic	NA
circRNA767	inf	up	0.241936	1	no	circRNA	GNS [Cervus elaphus hippelaphus]
circRNA7279	-inf	down	0.24218	1	no	circRNA	UBE3C [Cervus elaphus hippelaphus]
circRNA563	2.05621	up	0.242256	1	no	circRNA	hypothetical protein Celaphus_00001682, partial [Cervus elaphus hippelaphus]
circRNA7512	-inf	down	0.242301	1	no	circRNA	hypothetical protein Celaphus_00015726 [Cervus elaphus hippelaphus]
circRNA7681	-inf	down	0.242354	1	no	intergenic	NA
circRNA59	1.28283	up	0.242617	1	no	circRNA	DDX27 [Cervus elaphus hippelaphus]
circRNA1375	1.04252	up	0.242822	1	no	intergenic	NA
circRNA410	-0.824613	down	0.242828	1	no	circRNA	PDGFD, partial [Cervus elaphus hippelaphus]
circRNA4041	-1.8516	down	0.243997	1	no	intergenic	NA
circRNA2767	inf	up	0.244472	1	no	intergenic	NA
circRNA3063	0.949282	up	0.245585	1	no	intergenic	NA
circRNA475	2.41142	up	0.245605	1	no	circRNA	PI4K2B [Cervus elaphus hippelaphus]
circRNA2911	1.11238	up	0.24589	1	no	intergenic	NA
circRNA4248	-1.28067	down	0.245973	1	no	intergenic	NA
circRNA2220	1.11635	up	0.247546	1	no	intergenic	NA
circRNA4027	inf	up	0.248484	1	no	intergenic	NA
ciRNA444	inf	up	0.248614	1	no	ciRNA	ENOSF1, partial [Cervus elaphus hippelaphus]
circRNA4290	inf	up	0.248649	1	no	intergenic	NA
ciRNA262	2.03309	up	0.249146	1	no	ciRNA	hypothetical protein Celaphus_00017715, partial [Cervus elaphus hippelaphus]
circRNA6532	-inf	down	0.250334	1	no	intergenic	NA
circRNA1690	1.84733	up	0.250506	1	no	intergenic	NA
circRNA6530	-inf	down	0.250809	1	no	intergenic	NA
ciRNA868	-inf	down	0.2509	1	no	ciRNA	hypothetical protein Celaphus_00000378, partial [Cervus elaphus hippelaphus]
circRNA159	1.77006	up	0.251802	1	no	circRNA	hypothetical protein Celaphus_00005278 [Cervus elaphus hippelaphus]
circRNA4321	-1.45284	down	0.25186	1	no	intergenic	NA
circRNA6721	-inf	down	0.252772	1	no	intergenic	NA
circRNA7039	-inf	down	0.25279	1	no	intergenic	NA
circRNA6578	-inf	down	0.252812	1	no	intergenic	NA
circRNA6736	-inf	down	0.252906	1	no	intergenic	NA
circRNA7015	-inf	down	0.252913	1	no	intergenic	NA
circRNA7011	-inf	down	0.252976	1	no	intergenic	NA
circRNA7004	-inf	down	0.253039	1	no	intergenic	NA
ciRNA829	-inf	down	0.253334	1	no	ciRNA	AFF4, partial [Cervus elaphus hippelaphus]
circRNA801	1.56368	up	0.25354	1	no	circRNA	ADAMTS18 [Cervus elaphus hippelaphus]
circRNA6574	-inf	down	0.253595	1	no	intergenic	NA
circRNA2624	-1.0998	down	0.25363	1	no	intergenic	NA
circRNA6614	-inf	down	0.253855	1	no	intergenic	NA
circRNA6743	-inf	down	0.254115	1	no	intergenic	NA
circRNA6807	-inf	down	0.254119	1	no	intergenic	NA
circRNA6979	-inf	down	0.254256	1	no	intergenic	NA
circRNA1736	1.04569	up	0.254259	1	no	intergenic	NA
circRNA619	inf	up	0.254707	1	no	circRNA	ANKRD17 [Cervus elaphus hippelaphus]
circRNA2406	inf	up	0.254742	1	no	intergenic	NA
circRNA705	inf	up	0.254764	1	no	circRNA	FASTKD2 [Cervus elaphus hippelaphus]
circRNA3015	inf	up	0.254773	1	no	intergenic	NA
circRNA1897	inf	up	0.254884	1	no	intergenic	NA
circRNA558	1.26371	up	0.254886	1	no	circRNA	TBCD [Cervus elaphus hippelaphus]
circRNA1365	inf	up	0.255027	1	no	intergenic	NA
circRNA1094	inf	up	0.255145	1	no	circRNA	hypothetical protein Celaphus_00014653 [Cervus elaphus hippelaphus]
circRNA1777	1.44662	up	0.255372	1	no	intergenic	NA
circRNA2774	inf	up	0.255639	1	no	intergenic	NA
circRNA1883	inf	up	0.255739	1	no	intergenic	NA
circRNA2816	inf	up	0.255766	1	no	intergenic	NA
ciRNA238	inf	up	0.255812	1	no	ciRNA	hypothetical protein Celaphus_00010987 [Cervus elaphus hippelaphus]
circRNA1612	inf	up	0.255834	1	no	intergenic	NA
circRNA1739	inf	up	0.255839	1	no	intergenic	NA
circRNA3037	inf	up	0.255932	1	no	intergenic	NA
circRNA1510	-0.656033	down	0.256395	1	no	intergenic	NA
circRNA5637	-1.7967	down	0.257183	1	no	intergenic	NA
circRNA2040	1.92224	up	0.257315	1	no	intergenic	NA
circRNA948	1.22649	up	0.25865	1	no	circRNA	RNF38 [Cervus elaphus hippelaphus]
circRNA7001	-inf	down	0.25866	1	no	intergenic	NA
circRNA6997	-inf	down	0.258937	1	no	intergenic	NA
circRNA562	1.06535	up	0.258965	1	no	circRNA	phosphoribosyl pyrophosphate synthase-associated protein 1 isoform X1 [Odocoileus virginianus texanus]
circRNA6842	-inf	down	0.259002	1	no	intergenic	NA
circRNA7129	-inf	down	0.259008	1	no	circRNA	PLEKHA3, partial [Cervus elaphus hippelaphus]
circRNA6731	-inf	down	0.259031	1	no	intergenic	NA
circRNA6810	-inf	down	0.259053	1	no	intergenic	NA
circRNA6683	-inf	down	0.259162	1	no	intergenic	NA
circRNA6632	-inf	down	0.259172	1	no	intergenic	NA
circRNA6974	-inf	down	0.259205	1	no	intergenic	NA
circRNA6346	-inf	down	0.259277	1	no	circRNA	hypothetical protein Celaphus_00012672, partial [Cervus elaphus hippelaphus]
circRNA3158	1.13124	up	0.259299	1	no	circRNA	hypothetical protein Celaphus_00016027 [Cervus elaphus hippelaphus]
circRNA6853	-inf	down	0.259349	1	no	intergenic	NA
circRNA7138	-inf	down	0.259355	1	no	circRNA	PBX3 [Cervus elaphus hippelaphus]
ciRNA877	-inf	down	0.259382	1	no	ciRNA	ANKRD17 [Cervus elaphus hippelaphus]
circRNA6950	-inf	down	0.259423	1	no	intergenic	NA
circRNA2295	0.86019	up	0.259559	1	no	intergenic	NA
circRNA6858	-inf	down	0.259694	1	no	intergenic	NA
circRNA1785	0.944416	up	0.259989	1	no	intergenic	NA
circRNA1449	2.04971	up	0.260097	1	no	intergenic	NA
circRNA764	-1.51596	down	0.260208	1	no	circRNA	PDZRN4, partial [Cervus elaphus hippelaphus]
circRNA1929	inf	up	0.260377	1	no	intergenic	NA
circRNA1400	inf	up	0.260498	1	no	intergenic	NA
circRNA3097	inf	up	0.260549	1	no	circRNA	hypothetical protein Celaphus_00005580 [Cervus elaphus hippelaphus]
circRNA2844	inf	up	0.260639	1	no	intergenic	NA
circRNA4018	inf	up	0.260686	1	no	intergenic	NA
circRNA2034	inf	up	0.260688	1	no	intergenic	NA
circRNA3394	inf	up	0.260706	1	no	circRNA	hypothetical protein Celaphus_00018540, partial [Cervus elaphus hippelaphus]
circRNA3607	inf	up	0.260782	1	no	circRNA	ATP7A [Cervus elaphus hippelaphus]
circRNA3878	inf	up	0.260858	1	no	intergenic	NA
circRNA4132	inf	up	0.260861	1	no	intergenic	NA
circRNA3144	inf	up	0.260882	1	no	circRNA	MTDH, partial [Cervus elaphus hippelaphus]
circRNA3888	inf	up	0.260934	1	no	intergenic	NA
circRNA2726	inf	up	0.260956	1	no	intergenic	NA
circRNA1327	inf	up	0.260988	1	no	intergenic	NA
circRNA2193	inf	up	0.260999	1	no	intergenic	NA
ciRNA89	inf	up	0.261023	1	no	ciRNA	poly(rC)-binding protein 4 isoform X1 [Odocoileus virginianus texanus]
ciRNA246	inf	up	0.261031	1	no	ciRNA	SEC31A, partial [Cervus elaphus hippelaphus]
circRNA4181	inf	up	0.261038	1	no	intergenic	NA
ciRNA194	inf	up	0.26104	1	no	ciRNA	MSMO1 [Cervus elaphus hippelaphus]
circRNA4358	inf	up	0.261072	1	no	intergenic	NA
circRNA4287	inf	up	0.261164	1	no	intergenic	NA
circRNA973	inf	up	0.261213	1	no	circRNA	STARD8, partial [Cervus elaphus hippelaphus]
circRNA2889	1.47064	up	0.261925	1	no	intergenic	NA
circRNA1886	1.33639	up	0.261982	1	no	intergenic	NA
circRNA38	0.725087	up	0.262786	1	no	circRNA	hypothetical protein Celaphus_00007682, partial [Cervus elaphus hippelaphus]
circRNA7134	-inf	down	0.262846	1	no	circRNA	PBRM1, partial [Cervus elaphus hippelaphus]
circRNA6782	-inf	down	0.263	1	no	intergenic	NA
ciRNA814	-inf	down	0.263087	1	no	ciRNA	ZNF148 [Cervus elaphus hippelaphus]
circRNA6593	-inf	down	0.263131	1	no	intergenic	NA
circRNA6587	-inf	down	0.263262	1	no	intergenic	NA
circRNA6501	-inf	down	0.263335	1	no	circRNA	palmitoyltransferase ZDHHC3 isoform 4 [Homo sapiens]
circRNA6399	-inf	down	0.263336	1	no	circRNA	hypothetical protein Celaphus_00016361 [Cervus elaphus hippelaphus]
circRNA6256	-inf	down	0.263407	1	no	circRNA	hypothetical protein Celaphus_00001586 [Cervus elaphus hippelaphus]
ciRNA855	-inf	down	0.263413	1	no	ciRNA	hypothetical protein Celaphus_00005758 [Cervus elaphus hippelaphus]
circRNA7391	-inf	down	0.26355	1	no	circRNA	IGSF3 [Cervus elaphus hippelaphus]
ciRNA213	1.03949	up	0.263615	1	no	ciRNA	hypothetical protein Celaphus_00005877, partial [Cervus elaphus hippelaphus]
circRNA6521	-inf	down	0.263644	1	no	intergenic	NA
circRNA6306	-inf	down	0.263714	1	no	circRNA	ZNF326, partial [Cervus elaphus hippelaphus]
circRNA6322	-inf	down	0.26373	1	no	circRNA	UBR4 [Cervus elaphus hippelaphus]
circRNA6097	-inf	down	0.263738	1	no	circRNA	SPTLC2, partial [Cervus elaphus hippelaphus]
circRNA574	inf	up	0.26384	1	no	circRNA	IL27RA [Cervus elaphus hippelaphus]
circRNA6531	-inf	down	0.263953	1	no	intergenic	NA
circRNA3183	inf	up	0.263972	1	no	circRNA	hypothetical protein Celaphus_00015858 [Cervus elaphus hippelaphus]
circRNA2851	-2.38718	down	0.264104	1	no	intergenic	NA
circRNA6811	-inf	down	0.26412	1	no	intergenic	NA
circRNA3762	inf	up	0.264247	1	no	intergenic	NA
circRNA6685	-inf	down	0.26426	1	no	intergenic	NA
circRNA24	inf	up	0.264286	1	no	circRNA	PPFIBP1, partial [Cervus elaphus hippelaphus]
circRNA6757	-inf	down	0.264319	1	no	intergenic	NA
circRNA1867	inf	up	0.264339	1	no	intergenic	NA
ciRNA499	inf	up	0.264369	1	no	ciRNA	SEC24A, partial [Cervus elaphus hippelaphus]
circRNA3970	-1.51606	down	0.264445	1	no	intergenic	NA
circRNA6986	-inf	down	0.264445	1	no	intergenic	NA
circRNA3861	inf	up	0.264471	1	no	intergenic	NA
circRNA1370	inf	up	0.264487	1	no	intergenic	NA
circRNA4108	inf	up	0.264694	1	no	intergenic	NA
ciRNA142	1.52457	up	0.264895	1	no	ciRNA	SCARB1 [Cervus elaphus hippelaphus]
circRNA4190	inf	up	0.264933	1	no	intergenic	NA
circRNA4398	inf	up	0.265102	1	no	circRNA	NIM1K, partial [Cervus elaphus hippelaphus]
circRNA4193	inf	up	0.265171	1	no	intergenic	NA
circRNA6898	-inf	down	0.265173	1	no	intergenic	NA
circRNA4246	inf	up	0.265224	1	no	intergenic	NA
circRNA4198	inf	up	0.265409	1	no	intergenic	NA
circRNA6887	-inf	down	0.26541	1	no	intergenic	NA
circRNA6692	-inf	down	0.265501	1	no	intergenic	NA
circRNA6644	-inf	down	0.265598	1	no	intergenic	NA
circRNA6549	-inf	down	0.265606	1	no	intergenic	NA
circRNA2719	-0.764323	down	0.265793	1	no	intergenic	NA
circRNA6753	-inf	down	0.265907	1	no	intergenic	NA
circRNA2997	0.903262	up	0.266038	1	no	intergenic	NA
circRNA5201	-2.75917	down	0.266242	1	no	intergenic	NA
circRNA2672	1.90576	up	0.266468	1	no	intergenic	NA
circRNA804	2.47977	up	0.266488	1	no	circRNA	hypothetical protein Celaphus_00004046 [Cervus elaphus hippelaphus]
circRNA2808	inf	up	0.267496	1	no	intergenic	NA
circRNA2670	inf	up	0.267535	1	no	intergenic	NA
circRNA202	inf	up	0.26778	1	no	circRNA	LOXL3 [Cervus elaphus hippelaphus]
circRNA1965	inf	up	0.267893	1	no	intergenic	NA
circRNA1653	inf	up	0.267987	1	no	intergenic	NA
circRNA1505	inf	up	0.268173	1	no	intergenic	NA
ciRNA308	1.21722	up	0.268201	1	no	ciRNA	UBE3B [Cervus elaphus hippelaphus]
circRNA1039	inf	up	0.268252	1	no	circRNA	ZER1 [Cervus elaphus hippelaphus]
circRNA1021	inf	up	0.26833	1	no	circRNA	hypothetical protein Celaphus_00017544, partial [Cervus elaphus hippelaphus]
circRNA548	-1.25521	down	0.26844	1	no	circRNA	hypothetical protein Celaphus_00001287 [Cervus elaphus hippelaphus]
circRNA7640	-inf	down	0.268682	1	no	intergenic	NA
circRNA7579	-inf	down	0.26908	1	no	intergenic	NA
circRNA7752	-inf	down	0.269085	1	no	intergenic	NA
circRNA7568	-inf	down	0.269234	1	no	intergenic	NA
circRNA7497	-inf	down	0.269263	1	no	circRNA	SNX2, partial [Cervus elaphus hippelaphus]
circRNA6092	-inf	down	0.269361	1	no	circRNA	ECM2, partial [Cervus elaphus hippelaphus]
circRNA6635	-inf	down	0.269384	1	no	intergenic	NA
ciRNA969	-inf	down	0.269405	1	no	ciRNA	LEMD3 [Cervus elaphus hippelaphus]
circRNA2227	inf	up	0.269659	1	no	intergenic	NA
circRNA2031	inf	up	0.269731	1	no	intergenic	NA
circRNA1189	inf	up	0.269846	1	no	intergenic	NA
circRNA3028	-1.97336	down	0.270027	1	no	intergenic	NA
circRNA2122	-0.760554	down	0.270103	1	no	intergenic	NA
circRNA2254	inf	up	0.270135	1	no	intergenic	NA
circRNA3685	inf	up	0.270266	1	no	circRNA	ABHD10 [Cervus elaphus hippelaphus]
circRNA3135	inf	up	0.270552	1	no	circRNA	hypothetical protein Celaphus_00019188 [Cervus elaphus hippelaphus]
circRNA3784	inf	up	0.270578	1	no	intergenic	NA
circRNA2875	inf	up	0.27061	1	no	intergenic	NA
circRNA1178	inf	up	0.270728	1	no	circRNA	hypothetical protein DV515_00012245 [Erythrura gouldiae]
circRNA3902	inf	up	0.270889	1	no	intergenic	NA
circRNA1902	2.03578	up	0.270897	1	no	intergenic	NA
circRNA4207	inf	up	0.271124	1	no	intergenic	NA
circRNA3980	inf	up	0.271133	1	no	intergenic	NA
circRNA2013	inf	up	0.271172	1	no	intergenic	NA
circRNA3975	inf	up	0.2712	1	no	intergenic	NA
circRNA2276	inf	up	0.271359	1	no	intergenic	NA
circRNA3154	inf	up	0.271454	1	no	circRNA	CTDSP2 [Cervus elaphus hippelaphus]
circRNA3200	inf	up	0.271492	1	no	circRNA	phosphoribosyl pyrophosphate synthase-associated protein 1 isoform X1 [Odocoileus virginianus texanus]
circRNA2934	0.729499	up	0.271726	1	no	intergenic	NA
circRNA2723	-0.747155	down	0.271834	1	no	intergenic	NA
circRNA7741	-inf	down	0.272116	1	no	intergenic	NA
ciRNA992	-inf	down	0.272376	1	no	ciRNA	hypothetical protein Celaphus_00017417, partial [Cervus elaphus hippelaphus]
circRNA7733	-inf	down	0.272599	1	no	intergenic	NA
circRNA2520	0.977319	up	0.272612	1	no	intergenic	NA
circRNA2370	1.18827	up	0.273119	1	no	intergenic	NA
circRNA1401	-1.72623	down	0.273263	1	no	intergenic	NA
circRNA1906	inf	up	0.273347	1	no	intergenic	NA
circRNA3054	-0.831568	down	0.273421	1	no	intergenic	NA
circRNA6172	-inf	down	0.273495	1	no	circRNA	intraflagellar transport protein 56 isoform X1 [Odocoileus virginianus texanus]
circRNA3199	inf	up	0.273522	1	no	circRNA	hypothetical protein Celaphus_00017889 [Cervus elaphus hippelaphus]
circRNA1474	inf	up	0.273578	1	no	intergenic	NA
circRNA1581	0.518828	up	0.273978	1	no	intergenic	NA
circRNA1846	2.53457	up	0.274098	1	no	intergenic	NA
circRNA1565	1.13094	up	0.274449	1	no	intergenic	NA
circRNA6944	-inf	down	0.274694	1	no	intergenic	NA
ciRNA189	1.09419	up	0.274714	1	no	ciRNA	hypothetical protein Celaphus_00005758 [Cervus elaphus hippelaphus]
circRNA6933	-inf	down	0.274718	1	no	intergenic	NA
circRNA7005	-inf	down	0.275105	1	no	intergenic	NA
circRNA1111	-1.47834	down	0.276725	1	no	circRNA	hypothetical protein Celaphus_00017275 [Cervus elaphus hippelaphus]
ciRNA482	-1.71378	down	0.276739	1	no	ciRNA	PREDICTED: protein O-GlcNAcase isoform X1 [Mandrillus leucophaeus]
circRNA4177	inf	up	0.277114	1	no	intergenic	NA
circRNA700	1.56551	up	0.277255	1	no	circRNA	WDFY1, partial [Cervus elaphus hippelaphus]
circRNA3669	inf	up	0.277509	1	no	circRNA	DNAJB6 [Cervus elaphus hippelaphus]
circRNA4075	inf	up	0.27755	1	no	intergenic	NA
circRNA4067	inf	up	0.277632	1	no	intergenic	NA
ciRNA469	inf	up	0.277645	1	no	ciRNA	SOBP, partial [Cervus elaphus hippelaphus]
circRNA984	-0.636176	down	0.277645	1	no	circRNA	EFS [Cervus elaphus hippelaphus]
ciRNA518	inf	up	0.277677	1	no	ciRNA	CFDP1 [Cervus elaphus hippelaphus]
circRNA3774	inf	up	0.27772	1	no	intergenic	NA
ciRNA470	inf	up	0.277815	1	no	ciRNA	SOBP, partial [Cervus elaphus hippelaphus]
circRNA3525	2.94439	up	0.277818	1	no	circRNA	GALNT6 [Cervus elaphus hippelaphus]
circRNA4013	inf	up	0.27793	1	no	intergenic	NA
circRNA7481	-inf	down	0.278534	1	no	circRNA	hypothetical protein Celaphus_00003058, partial [Cervus elaphus hippelaphus]
circRNA959	-1.74277	down	0.278775	1	no	circRNA	RMND1, partial [Cervus elaphus hippelaphus]
ciRNA88	-1.67321	down	0.279677	1	no	ciRNA	ARHGEF12, partial [Cervus elaphus hippelaphus]
circRNA6015	-inf	down	0.279962	1	no	circRNA	hypothetical protein Celaphus_00007945 [Cervus elaphus hippelaphus]
circRNA4728	-3.05271	down	0.280432	1	no	circRNA	hypothetical protein Celaphus_00002887, partial [Cervus elaphus hippelaphus]
circRNA2975	-1.47101	down	0.280483	1	no	intergenic	NA
circRNA1740	-1.02519	down	0.280633	1	no	intergenic	NA
circRNA2729	1.38596	up	0.280891	1	no	intergenic	NA
circRNA2942	-0.654302	down	0.282008	1	no	intergenic	NA
circRNA2784	2.2732	up	0.28224	1	no	intergenic	NA
circRNA1731	1.927	up	0.282375	1	no	intergenic	NA
circRNA1553	1.16811	up	0.283147	1	no	intergenic	NA
circRNA1072	-1.05566	down	0.283536	1	no	circRNA	hypothetical protein Celaphus_00015567 [Cervus elaphus hippelaphus]
circRNA2365	-0.95741	down	0.283987	1	no	intergenic	NA
circRNA446	inf	up	0.284038	1	no	circRNA	fumarate hydratase, mitochondrial [Ovis aries]
circRNA2798	0.571197	up	0.284073	1	no	intergenic	NA
circRNA111	inf	up	0.284152	1	no	circRNA	AMOT, partial [Cervus elaphus hippelaphus]
circRNA2724	-1.22352	down	0.284496	1	no	intergenic	NA
circRNA7143	-inf	down	0.285185	1	no	circRNA	E3 ubiquitin-protein ligase HACE1 isoform X3 [Odocoileus virginianus texanus]
circRNA509	1.54734	up	0.285268	1	no	circRNA	SMARCA5 [Cervus elaphus hippelaphus]
circRNA514	1.04358	up	0.285716	1	no	circRNA	PREDICTED: septin-4 isoform X1 [Pantholops hodgsonii]
circRNA3731	-1.86647	down	0.285839	1	no	intergenic	NA
circRNA1456	1.12244	up	0.28622	1	no	intergenic	NA
circRNA4623	-2.49814	down	0.286255	1	no	circRNA	PLEKHA8 [Cervus elaphus hippelaphus]
circRNA3205	inf	up	0.287593	1	no	circRNA	RAD52 [Cervus elaphus hippelaphus]
circRNA1686	-0.637896	down	0.287675	1	no	intergenic	NA
circRNA2823	0.575619	up	0.287836	1	no	intergenic	NA
circRNA3247	inf	up	0.287887	1	no	circRNA	hypothetical protein Celaphus_00010148, partial [Cervus elaphus hippelaphus]
ciRNA462	inf	up	0.287914	1	no	ciRNA	PPWD1 [Cervus elaphus hippelaphus]
circRNA2312	-1.08908	down	0.287961	1	no	intergenic	NA
circRNA3633	inf	up	0.288076	1	no	circRNA	FAT3, partial [Cervus elaphus hippelaphus]
circRNA3278	inf	up	0.288181	1	no	circRNA	hypothetical protein Celaphus_00005656, partial [Cervus elaphus hippelaphus]
circRNA1684	0.582793	up	0.288233	1	no	intergenic	NA
circRNA3383	inf	up	0.288475	1	no	circRNA	fumarate hydratase, mitochondrial [Ovis aries]
circRNA3642	inf	up	0.288565	1	no	circRNA	SLK [Cervus elaphus hippelaphus]
circRNA2407	0.981493	up	0.288853	1	no	intergenic	NA
circRNA3673	inf	up	0.289055	1	no	circRNA	ATF7IP [Cervus elaphus hippelaphus]
circRNA3059	1.46353	up	0.289417	1	no	intergenic	NA
circRNA4339	inf	up	0.289508	1	no	intergenic	NA
circRNA3686	inf	up	0.289546	1	no	circRNA	hypothetical protein Celaphus_00004140 [Cervus elaphus hippelaphus]
circRNA4265	inf	up	0.289567	1	no	intergenic	NA
circRNA4138	inf	up	0.289633	1	no	intergenic	NA
circRNA3979	inf	up	0.289699	1	no	intergenic	NA
circRNA3900	inf	up	0.289907	1	no	intergenic	NA
circRNA7323	-inf	down	0.291239	1	no	circRNA	ETFDH [Cervus elaphus hippelaphus]
ciRNA285	0.897618	up	0.291248	1	no	ciRNA	AIDA, partial [Cervus elaphus hippelaphus]
circRNA7461	-inf	down	0.291314	1	no	circRNA	SUPT20H [Cervus elaphus hippelaphus]
circRNA7635	-inf	down	0.291422	1	no	intergenic	NA
circRNA466	inf	up	0.291543	1	no	circRNA	hypothetical protein Celaphus_00011295 [Cervus elaphus hippelaphus]
circRNA930	-2.52929	down	0.291834	1	no	circRNA	hypothetical protein Celaphus_00018083 [Cervus elaphus hippelaphus]
circRNA171	-1.9894	down	0.291868	1	no	circRNA	hypothetical protein Celaphus_00005315, partial [Cervus elaphus hippelaphus]
circRNA2978	0.917933	up	0.292424	1	no	intergenic	NA
ciRNA283	0.926969	up	0.292759	1	no	ciRNA	SEC24A, partial [Cervus elaphus hippelaphus]
circRNA1452	1.89805	up	0.29393	1	no	intergenic	NA
circRNA2259	inf	up	0.294013	1	no	intergenic	NA
circRNA2500	inf	up	0.294378	1	no	intergenic	NA
circRNA2608	inf	up	0.294742	1	no	intergenic	NA
circRNA1220	-2.03774	down	0.294797	1	no	intergenic	NA
circRNA4031	-1.86181	down	0.294925	1	no	intergenic	NA
circRNA2646	inf	up	0.295086	1	no	intergenic	NA
circRNA2698	inf	up	0.295197	1	no	intergenic	NA
circRNA2781	inf	up	0.295361	1	no	intergenic	NA
circRNA2992	inf	up	0.295526	1	no	intergenic	NA
circRNA3044	inf	up	0.29569	1	no	intergenic	NA
circRNA925	inf	up	0.295854	1	no	circRNA	NADK2 [Cervus elaphus hippelaphus]
circRNA6778	-inf	down	0.296358	1	no	intergenic	NA
circRNA2399	2.63565	up	0.296365	1	no	intergenic	NA
circRNA6759	-inf	down	0.29643	1	no	intergenic	NA
ciRNA826	-inf	down	0.296503	1	no	ciRNA	PIN2-interacting protein 1, partial [Bos taurus]
ciRNA810	-inf	down	0.296576	1	no	ciRNA	GORAB [Cervus elaphus hippelaphus]
circRNA1222	-2.76022	down	0.296715	1	no	intergenic	NA
circRNA6814	-inf	down	0.296716	1	no	intergenic	NA
circRNA6963	-inf	down	0.297074	1	no	intergenic	NA
circRNA1210	1.70473	up	0.297228	1	no	intergenic	NA
circRNA2777	2.70174	up	0.297375	1	no	intergenic	NA
circRNA6787	-inf	down	0.297395	1	no	intergenic	NA
circRNA6786	-inf	down	0.297526	1	no	intergenic	NA
circRNA6784	-inf	down	0.297659	1	no	intergenic	NA
circRNA6750	-inf	down	0.297791	1	no	intergenic	NA
circRNA7099	-inf	down	0.297804	1	no	intergenic	NA
circRNA6624	-inf	down	0.297924	1	no	intergenic	NA
circRNA6544	-inf	down	0.298058	1	no	intergenic	NA
circRNA1676	-2.07375	down	0.298112	1	no	intergenic	NA
circRNA6430	-inf	down	0.298191	1	no	circRNA	hypothetical protein Celaphus_00016785, partial [Cervus elaphus hippelaphus]
circRNA566	inf	up	0.298198	1	no	circRNA	TBC1D9B [Cervus elaphus hippelaphus]
circRNA7114	-inf	down	0.298212	1	no	intergenic	NA
circRNA1928	inf	up	0.298216	1	no	intergenic	NA
ciRNA628	-1.38143	down	0.298253	1	no	ciRNA	USP37 [Cervus elaphus hippelaphus]
circRNA6421	-inf	down	0.298325	1	no	circRNA	hypothetical protein Celaphus_00017727 [Cervus elaphus hippelaphus]
circRNA4413	-1.17778	down	0.29845	1	no	circRNA	hypothetical protein Celaphus_00006721 [Cervus elaphus hippelaphus]
circRNA6377	-inf	down	0.29846	1	no	circRNA	ADAMTS18 [Cervus elaphus hippelaphus]
circRNA1174	inf	up	0.298485	1	no	circRNA	hypothetical protein Celaphus_00008088 [Cervus elaphus hippelaphus]
circRNA1925	-1.74243	down	0.298563	1	no	intergenic	NA
circRNA6302	-inf	down	0.298594	1	no	circRNA	hypothetical protein Celaphus_00002132 [Cervus elaphus hippelaphus]
circRNA7133	-inf	down	0.298619	1	no	circRNA	ARIH1 [Cervus elaphus hippelaphus]
circRNA7771	-inf	down	0.298821	1	no	intergenic	NA
circRNA2734	-1.35338	down	0.298871	1	no	intergenic	NA
ciRNA200	-1.09841	down	0.298882	1	no	ciRNA	hypothetical protein Celaphus_00019070 [Cervus elaphus hippelaphus]
circRNA7722	-inf	down	0.298893	1	no	intergenic	NA
ciRNA878	-inf	down	0.298898	1	no	ciRNA	ANKRD17 [Cervus elaphus hippelaphus]
circRNA7597	-inf	down	0.298943	1	no	intergenic	NA
circRNA7428	-inf	down	0.298958	1	no	circRNA	R3HDM2 [Cervus elaphus hippelaphus]
circRNA7843	-inf	down	0.299096	1	no	intergenic	NA
circRNA7318	-inf	down	0.299255	1	no	circRNA	MED13L, partial [Cervus elaphus hippelaphus]
circRNA7394	-inf	down	0.2993	1	no	circRNA	cell division cycle 7-related protein kinase [Odocoileus virginianus texanus]
circRNA7858	-inf	down	0.299378	1	no	intergenic	NA
circRNA2789	1.23928	up	0.299396	1	no	intergenic	NA
ciRNA825	-inf	down	0.299433	1	no	ciRNA	hypothetical protein Celaphus_00009539 [Cervus elaphus hippelaphus]
circRNA1726	-1.75045	down	0.299568	1	no	intergenic	NA
circRNA3800	1.53376	up	0.299607	1	no	intergenic	NA
circRNA2148	-0.601443	down	0.299841	1	no	intergenic	NA
circRNA1293	1.01484	up	0.300764	1	no	intergenic	NA
circRNA1065	-1.98926	down	0.301145	1	no	circRNA	DYRK1A [Cervus elaphus hippelaphus]
circRNA2969	-0.810586	down	0.301276	1	no	intergenic	NA
circRNA139	0.717097	up	0.301374	1	no	circRNA	SLF2, partial [Cervus elaphus hippelaphus]
ciRNA519	-1.35441	down	0.301725	1	no	ciRNA	PREDICTED: RING finger and transmembrane domain-containing protein 2 isoform X1 [Tursiops truncatus]
circRNA987	0.569579	up	0.301798	1	no	circRNA	RNF4 [Cervus elaphus hippelaphus]
ciRNA155	inf	up	0.301806	1	no	ciRNA	hypothetical protein Celaphus_00018389 [Cervus elaphus hippelaphus]
circRNA3051	inf	up	0.301832	1	no	intergenic	NA
circRNA3031	inf	up	0.302161	1	no	intergenic	NA
ciRNA226	inf	up	0.302224	1	no	ciRNA	hypothetical protein Celaphus_00010183 [Cervus elaphus hippelaphus]
circRNA3090	inf	up	0.302227	1	no	circRNA	hypothetical protein Celaphus_00008105, partial [Cervus elaphus hippelaphus]
circRNA2953	inf	up	0.302243	1	no	intergenic	NA
circRNA2720	inf	up	0.302325	1	no	intergenic	NA
circRNA2540	inf	up	0.302408	1	no	intergenic	NA
ciRNA318	1.02443	up	0.302607	1	no	ciRNA	ORC6 [Cervus elaphus hippelaphus]
circRNA3193	inf	up	0.302621	1	no	circRNA	hypothetical protein Celaphus_00004046 [Cervus elaphus hippelaphus]
ciRNA61	inf	up	0.302641	1	no	ciRNA	SPEG [Cervus elaphus hippelaphus]
circRNA2502	inf	up	0.302977	1	no	intergenic	NA
circRNA418	inf	up	0.303033	1	no	circRNA	GRAMD1B [Cervus elaphus hippelaphus]
circRNA1157	inf	up	0.303056	1	no	circRNA	CMTM7 [Cervus elaphus hippelaphus]
circRNA2462	-0.799024	down	0.30331	1	no	intergenic	NA
circRNA522	inf	up	0.303444	1	no	circRNA	hypothetical protein A6R68_04102 [Neotoma lepida]
circRNA1195	inf	up	0.303482	1	no	intergenic	NA
circRNA2444	inf	up	0.303548	1	no	intergenic	NA
circRNA2126	1.1333	up	0.303648	1	no	intergenic	NA
circRNA2388	inf	up	0.303675	1	no	intergenic	NA
circRNA2279	inf	up	0.303801	1	no	intergenic	NA
circRNA900	inf	up	0.303853	1	no	circRNA	integrator complex subunit 6 isoform X3 [Odocoileus virginianus texanus]
circRNA1786	inf	up	0.303907	1	no	intergenic	NA
circRNA2098	inf	up	0.303928	1	no	intergenic	NA
circRNA2044	inf	up	0.304055	1	no	intergenic	NA
circRNA1899	inf	up	0.304182	1	no	intergenic	NA
circRNA2754	-0.628578	down	0.304184	1	no	intergenic	NA
circRNA958	inf	up	0.304262	1	no	circRNA	monofunctional C1-tetrahydrofolate synthase, mitochondrial [Ovis aries]
circRNA1861	inf	up	0.30433	1	no	intergenic	NA
circRNA4124	-2.42193	down	0.304635	1	no	intergenic	NA
circRNA1998	-0.99019	down	0.304671	1	no	intergenic	NA
ciRNA178	-1.655	down	0.30535	1	no	ciRNA	DNAJC21 [Cervus elaphus hippelaphus]
circRNA669	inf	up	0.30548	1	no	circRNA	KDM4A [Cervus elaphus hippelaphus]
circRNA1713	1.9326	up	0.30597	1	no	intergenic	NA
circRNA7328	-inf	down	0.306076	1	no	circRNA	hypothetical protein Celaphus_00000695, partial [Cervus elaphus hippelaphus]
circRNA832	1.42235	up	0.306248	1	no	circRNA	NUCB1 [Cervus elaphus hippelaphus]
circRNA852	0.722948	up	0.306361	1	no	circRNA	INTS8 [Cervus elaphus hippelaphus]
circRNA3864	-1.36797	down	0.306558	1	no	intergenic	NA
circRNA5712	-2.64087	down	0.307333	1	no	intergenic	NA
circRNA2482	-0.751705	down	0.307838	1	no	intergenic	NA
ciRNA143	1.28472	up	0.308104	1	no	ciRNA	NAA11 [Cervus elaphus hippelaphus]
circRNA2943	-0.760194	down	0.308394	1	no	intergenic	NA
circRNA2245	1.27606	up	0.309401	1	no	intergenic	NA
circRNA5100	-1.51852	down	0.309455	1	no	intergenic	NA
circRNA1010	-0.754076	down	0.309934	1	no	circRNA	DHX16, partial [Cervus elaphus hippelaphus]
circRNA334	2.08316	up	0.310072	1	no	circRNA	FADS2 [Cervus elaphus hippelaphus]
ciRNA298	2.00722	up	0.310391	1	no	ciRNA	SOX6 [Cervus elaphus hippelaphus]
circRNA1141	1.43779	up	0.310474	1	no	circRNA	hypothetical protein Celaphus_00002756 [Cervus elaphus hippelaphus]
circRNA5780	-1.4653	down	0.311789	1	no	intergenic	NA
circRNA2680	2.50641	up	0.312014	1	no	intergenic	NA
circRNA3978	2.54463	up	0.312268	1	no	intergenic	NA
circRNA2150	1.69337	up	0.312441	1	no	intergenic	NA
circRNA3938	inf	up	0.312641	1	no	intergenic	NA
circRNA3856	inf	up	0.312777	1	no	intergenic	NA
circRNA3987	inf	up	0.313045	1	no	intergenic	NA
circRNA3772	inf	up	0.313164	1	no	intergenic	NA
circRNA3612	inf	up	0.313263	1	no	circRNA	hypothetical protein Celaphus_00000518 [Cervus elaphus hippelaphus]
circRNA3330	inf	up	0.313362	1	no	circRNA	POLH [Cervus elaphus hippelaphus]
circRNA4283	inf	up	0.313447	1	no	intergenic	NA
circRNA3245	inf	up	0.313461	1	no	circRNA	hypothetical protein Celaphus_00010094 [Cervus elaphus hippelaphus]
circRNA3102	2.47314	up	0.31466	1	no	circRNA	COL1A1 [Cervus elaphus hippelaphus]
circRNA3162	-0.798028	down	0.314727	1	no	circRNA	hypothetical protein Celaphus_00001543, partial [Cervus elaphus hippelaphus]
circRNA2847	-1.93698	down	0.315101	1	no	intergenic	NA
circRNA1404	-1.19807	down	0.31515	1	no	intergenic	NA
circRNA2973	0.544725	up	0.315238	1	no	intergenic	NA
circRNA538	inf	up	0.315587	1	no	circRNA	NDEL1 [Cervus elaphus hippelaphus]
circRNA437	-2.86836	down	0.317054	1	no	circRNA	condensin-2 complex subunit D3 isoform X4 [Odocoileus virginianus texanus]
ciRNA183	-1.44679	down	0.317163	1	no	ciRNA	hypothetical protein Celaphus_00002927 [Cervus elaphus hippelaphus]
circRNA2323	-1.64222	down	0.318284	1	no	intergenic	NA
circRNA3011	1.31693	up	0.318286	1	no	intergenic	NA
circRNA2615	1.97742	up	0.319881	1	no	intergenic	NA
circRNA3450	inf	up	0.320082	1	no	circRNA	ZFYVE16 [Cervus elaphus hippelaphus]
circRNA2810	1.61207	up	0.320363	1	no	intergenic	NA
circRNA3379	inf	up	0.320416	1	no	circRNA	condensin-2 complex subunit D3 isoform X4 [Odocoileus virginianus texanus]
circRNA269	inf	up	0.320785	1	no	circRNA	hypothetical protein Celaphus_00015232 [Cervus elaphus hippelaphus]
circRNA288	inf	up	0.320802	1	no	circRNA	CLK3 [Cervus elaphus hippelaphus]
circRNA3275	inf	up	0.320944	1	no	circRNA	GGCX [Cervus elaphus hippelaphus]
circRNA39	0.97255	up	0.321056	1	no	circRNA	glycerophosphocholine phosphodiesterase GPCPD1 isoform X2 [Bubalus bubalis]
circRNA6381	-inf	down	0.321725	1	no	circRNA	BBS2 [Cervus elaphus hippelaphus]
ciRNA126	-0.731066	down	0.321882	1	no	ciRNA	kinesin-like protein KIF23 isoform X1 [Odocoileus virginianus texanus]
circRNA6355	-inf	down	0.322051	1	no	circRNA	hypothetical protein Celaphus_00012805, partial [Cervus elaphus hippelaphus]
circRNA6295	-inf	down	0.322056	1	no	circRNA	Transgelin-2, partial [Bos mutus]
circRNA193	1.1585	up	0.322695	1	no	circRNA	PSME4, partial [Cervus elaphus hippelaphus]
ciRNA820	-inf	down	0.322761	1	no	ciRNA	hypothetical protein Celaphus_00019307, partial [Cervus elaphus hippelaphus]
circRNA3572	-1.60852	down	0.322781	1	no	circRNA	YES1, partial [Cervus elaphus hippelaphus]
ciRNA898	-inf	down	0.323129	1	no	ciRNA	hypothetical protein Celaphus_00018856 [Cervus elaphus hippelaphus]
circRNA6167	-inf	down	0.323473	1	no	circRNA	STEAP1 [Cervus elaphus hippelaphus]
circRNA2158	-0.694715	down	0.323585	1	no	intergenic	NA
circRNA1627	1.07286	up	0.32369	1	no	intergenic	NA
circRNA6845	-inf	down	0.323776	1	no	intergenic	NA
circRNA1815	0.796326	up	0.323827	1	no	intergenic	NA
circRNA6871	-inf	down	0.324077	1	no	intergenic	NA
circRNA1014	-0.929708	down	0.324176	1	no	circRNA	PREDICTED: ras-specific guanine nucleotide-releasing factor RalGPS2 isoform X2 [Bos mutus]
circRNA181	inf	up	0.324412	1	no	circRNA	hypothetical protein Celaphus_00005445, partial [Cervus elaphus hippelaphus]
circRNA7012	-inf	down	0.324478	1	no	intergenic	NA
circRNA1750	-0.8221	down	0.32456	1	no	intergenic	NA
circRNA721	inf	up	0.324688	1	no	circRNA	SNX4 [Cervus elaphus hippelaphus]
circRNA1839	0.867486	up	0.324807	1	no	intergenic	NA
circRNA7135	-inf	down	0.324878	1	no	circRNA	RNA-binding protein 14 [Bos taurus]
circRNA2946	0.978238	up	0.325259	1	no	intergenic	NA
circRNA2685	1.51345	up	0.325975	1	no	intergenic	NA
circRNA7517	-inf	down	0.327677	1	no	circRNA	hypothetical protein Celaphus_00015561 [Cervus elaphus hippelaphus]
circRNA7490	-inf	down	0.327738	1	no	circRNA	EIF4G2, partial [Cervus elaphus hippelaphus]
circRNA7258	-inf	down	0.328039	1	no	circRNA	RFC2 [Cervus elaphus hippelaphus]
circRNA7532	-inf	down	0.328066	1	no	intergenic	NA
ciRNA983	-inf	down	0.328342	1	no	ciRNA	TUSC3, partial [Cervus elaphus hippelaphus]
circRNA7612	-inf	down	0.328474	1	no	intergenic	NA
circRNA2796	-1.5915	down	0.328874	1	no	intergenic	NA
circRNA7695	-inf	down	0.32888	1	no	intergenic	NA
circRNA7915	-inf	down	0.329173	1	no	circRNA	ELK4 [Cervus elaphus hippelaphus]
circRNA7879	-inf	down	0.329285	1	no	intergenic	NA
circRNA3591	inf	up	0.329654	1	no	circRNA	hypothetical protein Celaphus_00018159 [Cervus elaphus hippelaphus]
ciRNA210	inf	up	0.33045	1	no	ciRNA	CENPL [Cervus elaphus hippelaphus]
circRNA795	0.491944	up	0.330745	1	no	circRNA	hypothetical protein Celaphus_00019394, partial [Cervus elaphus hippelaphus]
circRNA1604	inf	up	0.330805	1	no	intergenic	NA
circRNA1647	inf	up	0.33116	1	no	intergenic	NA
circRNA2598	inf	up	0.331244	1	no	intergenic	NA
circRNA2499	inf	up	0.331419	1	no	intergenic	NA
circRNA2400	inf	up	0.331508	1	no	intergenic	NA
circRNA2379	inf	up	0.331539	1	no	intergenic	NA
circRNA6262	-inf	down	0.331733	1	no	circRNA	BABAM1 [Cervus elaphus hippelaphus]
circRNA6384	-inf	down	0.331906	1	no	circRNA	DYNC1LI2 [Cervus elaphus hippelaphus]
circRNA6300	-inf	down	0.332165	1	no	circRNA	hypothetical protein Celaphus_00002110, partial [Cervus elaphus hippelaphus]
ciRNA176	1.07671	up	0.333982	1	no	ciRNA	GPRC5C [Cervus elaphus hippelaphus]
circRNA1323	0.626496	up	0.33426	1	no	intergenic	NA
circRNA531	2.12092	up	0.337484	1	no	circRNA	hypothetical protein Celaphus_00000878 [Cervus elaphus hippelaphus]
circRNA2356	0.919338	up	0.338175	1	no	intergenic	NA
circRNA253	inf	up	0.33843	1	no	circRNA	BAHD1 [Cervus elaphus hippelaphus]
circRNA881	inf	up	0.33847	1	no	circRNA	hypothetical protein Celaphus_00017760 [Cervus elaphus hippelaphus]
circRNA499	inf	up	0.338472	1	no	circRNA	ATP6V0A2 [Cervus elaphus hippelaphus]
circRNA2290	0.986352	up	0.339219	1	no	intergenic	NA
ciRNA112	-0.968381	down	0.339319	1	no	ciRNA	hypothetical protein Celaphus_00011025 [Cervus elaphus hippelaphus]
circRNA3346	1.34771	up	0.339328	1	no	circRNA	hypothetical protein Celaphus_00006957 [Cervus elaphus hippelaphus]
circRNA4250	-2.18469	down	0.339751	1	no	intergenic	NA
circRNA3023	0.635167	up	0.340009	1	no	intergenic	NA
circRNA4976	-1.61929	down	0.340529	1	no	circRNA	RMND1, partial [Cervus elaphus hippelaphus]
circRNA2473	2.07183	up	0.342231	1	no	intergenic	NA
circRNA2172	-1.28221	down	0.342293	1	no	intergenic	NA
circRNA1914	-0.808511	down	0.342454	1	no	intergenic	NA
circRNA1058	0.706849	up	0.34315	1	no	circRNA	URB1, partial [Cervus elaphus hippelaphus]
ciRNA270	0.78936	up	0.34365	1	no	ciRNA	hypothetical protein Celaphus_00005247 [Cervus elaphus hippelaphus]
circRNA2760	0.899556	up	0.343848	1	no	intergenic	NA
circRNA64	-1.63646	down	0.343986	1	no	circRNA	CRTAP [Cervus elaphus hippelaphus]
circRNA1666	0.950209	up	0.344338	1	no	intergenic	NA
circRNA2165	2.4529	up	0.344647	1	no	intergenic	NA
circRNA2971	-2.2537	down	0.345342	1	no	intergenic	NA
circRNA1061	-2.24382	down	0.345812	1	no	circRNA	hypothetical protein Celaphus_00000853 [Cervus elaphus hippelaphus]
circRNA19	inf	up	0.345835	1	no	circRNA	hypothetical protein Celaphus_00014004, partial [Cervus elaphus hippelaphus]
circRNA481	inf	up	0.346153	1	no	circRNA	THOC5 [Cervus elaphus hippelaphus]
circRNA2088	0.537863	up	0.346177	1	no	intergenic	NA
circRNA2587	2.38236	up	0.346391	1	no	intergenic	NA
circRNA1671	2.38236	up	0.346421	1	no	intergenic	NA
circRNA1574	0.848648	up	0.346959	1	no	intergenic	NA
circRNA2925	0.758261	up	0.347601	1	no	intergenic	NA
circRNA1079	-0.65058	down	0.347617	1	no	circRNA	EHMT1, partial [Cervus elaphus hippelaphus]
circRNA2990	1.25922	up	0.348392	1	no	intergenic	NA
circRNA1158	0.890594	up	0.350236	1	no	circRNA	SEC16B [Cervus elaphus hippelaphus]
circRNA2821	0.964518	up	0.350246	1	no	intergenic	NA
circRNA3094	-0.97648	down	0.350296	1	no	circRNA	F-box/LRR-repeat protein 7 [Bos taurus]
circRNA626	1.55437	up	0.350627	1	no	circRNA	DDR2 [Cervus elaphus hippelaphus]
circRNA1680	1.14917	up	0.351054	1	no	intergenic	NA
circRNA2938	1.88607	up	0.351232	1	no	intergenic	NA
circRNA361	-1.49961	down	0.351769	1	no	circRNA	hypothetical protein Celaphus_00006967 [Cervus elaphus hippelaphus]
ciRNA336	-2.56708	down	0.352084	1	no	ciRNA	hypothetical protein Celaphus_00017041 [Cervus elaphus hippelaphus]
circRNA1571	2.18899	up	0.353564	1	no	intergenic	NA
circRNA2459	2.33323	up	0.353586	1	no	intergenic	NA
circRNA1162	0.64239	up	0.35368	1	no	circRNA	hypothetical protein Celaphus_00000180 [Cervus elaphus hippelaphus]
circRNA1034	1.79247	up	0.353714	1	no	circRNA	hypothetical protein Celaphus_00014547, partial [Cervus elaphus hippelaphus]
circRNA3078	0.93592	up	0.353874	1	no	intergenic	NA
circRNA1672	0.633472	up	0.353981	1	no	intergenic	NA
circRNA3153	1.69785	up	0.354764	1	no	circRNA	ANP32B [Cervus elaphus hippelaphus]
circRNA1573	-0.777731	down	0.355196	1	no	intergenic	NA
circRNA4384	-2.18931	down	0.355323	1	no	intergenic	NA
circRNA3149	-1.05739	down	0.355466	1	no	circRNA	EXOSC8 [Cervus elaphus hippelaphus]
circRNA4924	-1.90132	down	0.355973	1	no	circRNA	CDC2L6 protein, partial [Homo sapiens]
circRNA2693	0.446057	up	0.356816	1	no	intergenic	NA
circRNA70	inf	up	0.357163	1	no	circRNA	hypothetical protein Celaphus_00010310, partial [Cervus elaphus hippelaphus]
circRNA1945	1.30788	up	0.357165	1	no	intergenic	NA
circRNA688	inf	up	0.357295	1	no	circRNA	RCAN3, partial [Cervus elaphus hippelaphus]
circRNA3499	inf	up	0.357556	1	no	circRNA	INO80D [Cervus elaphus hippelaphus]
circRNA3488	inf	up	0.357671	1	no	circRNA	ubiquitin carboxyl-terminal hydrolase 40 isoform X1 [Odocoileus virginianus texanus]
circRNA2050	0.81266	up	0.357741	1	no	intergenic	NA
circRNA3276	inf	up	0.357786	1	no	circRNA	USP39, partial [Cervus elaphus hippelaphus]
circRNA3231	inf	up	0.35783	1	no	circRNA	LOW QUALITY PROTEIN: RNA-binding protein 5 [Carlito syrichta]
circRNA7416	-inf	down	0.359384	1	no	circRNA	BRWD1 [Cervus elaphus hippelaphus]
circRNA2200	-0.862023	down	0.359507	1	no	intergenic	NA
circRNA7372	-inf	down	0.359517	1	no	circRNA	GAK, partial [Cervus elaphus hippelaphus]
circRNA7190	-inf	down	0.35965	1	no	circRNA	GAPVD1 [Cervus elaphus hippelaphus]
circRNA1126	1.81835	up	0.360947	1	no	circRNA	hypothetical protein Celaphus_00009550, partial [Cervus elaphus hippelaphus]
circRNA6201	-inf	down	0.361406	1	no	circRNA	hypothetical protein Celaphus_00011140 [Cervus elaphus hippelaphus]
circRNA6325	-inf	down	0.36173	1	no	circRNA	eukaryotic translation initiation factor 4 gamma 3 isoform X4 [Bos indicus x Bos taurus]
circRNA1373	0.561323	up	0.362409	1	no	intergenic	NA
circRNA3130	-1.04123	down	0.362454	1	no	circRNA	SPG20 [Cervus elaphus hippelaphus]
circRNA1487	-0.693873	down	0.362458	1	no	intergenic	NA
circRNA2570	0.670588	up	0.365008	1	no	intergenic	NA
ciRNA345	1.1843	up	0.365169	1	no	ciRNA	hypothetical protein Celaphus_00016385, partial [Cervus elaphus hippelaphus]
circRNA2197	-0.743617	down	0.367335	1	no	intergenic	NA
circRNA1028	1.34159	up	0.36806	1	no	circRNA	MYSM1 [Cervus elaphus hippelaphus]
circRNA4405	1.56412	up	0.368875	1	no	circRNA	hypothetical protein Celaphus_00014744 [Cervus elaphus hippelaphus]
ciRNA334	-1.44242	down	0.369777	1	no	ciRNA	ATP-dependent RNA helicase SUPV3L1, mitochondrial [Bos mutus]
circRNA281	0.859693	up	0.370212	1	no	circRNA	TSPAN3 [Cervus elaphus hippelaphus]
circRNA2999	1.3067	up	0.370262	1	no	intergenic	NA
circRNA420	0.543688	up	0.370814	1	no	circRNA	SOX6 [Cervus elaphus hippelaphus]
circRNA3012	0.82325	up	0.370879	1	no	intergenic	NA
circRNA2944	0.590058	up	0.371334	1	no	intergenic	NA
circRNA4407	-1.41351	down	0.371656	1	no	circRNA	COQ2, partial [Cervus elaphus hippelaphus]
circRNA5301	-1.56102	down	0.371796	1	no	intergenic	NA
circRNA218	-0.713623	down	0.371925	1	no	circRNA	BAG1 [Cervus elaphus hippelaphus]
circRNA1368	1.24525	up	0.372384	1	no	intergenic	NA
circRNA3595	-1.89922	down	0.373765	1	no	circRNA	hypothetical protein Celaphus_00018273, partial [Cervus elaphus hippelaphus]
circRNA1644	2.00468	up	0.373828	1	no	intergenic	NA
circRNA2815	-1.57483	down	0.373938	1	no	intergenic	NA
circRNA1303	0.549538	up	0.374224	1	no	intergenic	NA
circRNA3449	-1.42863	down	0.374231	1	no	circRNA	HMMR, partial [Cervus elaphus hippelaphus]
circRNA1513	-0.876448	down	0.374314	1	no	intergenic	NA
circRNA4186	-1.36476	down	0.374968	1	no	intergenic	NA
circRNA167	-2.04878	down	0.375613	1	no	circRNA	NBAS [Cervus elaphus hippelaphus]
circRNA591	2.49444	up	0.375663	1	no	circRNA	E3 ubiquitin-protein ligase HUWE1 isoform X6 [Odocoileus virginianus texanus]
ciRNA680	-1.22036	down	0.376051	1	no	ciRNA	STYX [Cervus elaphus hippelaphus]
circRNA2503	1.16917	up	0.376453	1	no	intergenic	NA
circRNA1814	0.474885	up	0.376672	1	no	intergenic	NA
circRNA2166	1.75068	up	0.376835	1	no	intergenic	NA
circRNA2464	0.747362	up	0.377493	1	no	intergenic	NA
circRNA5694	-1.22445	down	0.37823	1	no	intergenic	NA
ciRNA108	1.89769	up	0.378283	1	no	ciRNA	hypothetical protein Celaphus_00012613, partial [Cervus elaphus hippelaphus]
circRNA2869	-1.18538	down	0.378792	1	no	intergenic	NA
ciRNA356	-0.875894	down	0.379171	1	no	ciRNA	MYCBP2, partial [Cervus elaphus hippelaphus]
circRNA2004	-1.05792	down	0.380429	1	no	intergenic	NA
circRNA3527	-1.87039	down	0.380732	1	no	circRNA	hypothetical protein Celaphus_00011487 [Cervus elaphus hippelaphus]
circRNA1112	0.949194	up	0.381248	1	no	circRNA	hypothetical protein Celaphus_00017275 [Cervus elaphus hippelaphus]
ciRNA87	-0.724713	down	0.381294	1	no	ciRNA	hypothetical protein Celaphus_00017561, partial [Cervus elaphus hippelaphus]
circRNA2590	-0.787116	down	0.381505	1	no	intergenic	NA
circRNA1434	0.565707	up	0.382241	1	no	intergenic	NA
circRNA3959	-1.69424	down	0.382927	1	no	intergenic	NA
circRNA1536	0.969619	up	0.382971	1	no	intergenic	NA
circRNA759	-1.54259	down	0.383191	1	no	circRNA	CEP290 [Cervus elaphus hippelaphus]
circRNA2903	-1.00305	down	0.383388	1	no	intergenic	NA
circRNA2504	-0.693491	down	0.384925	1	no	intergenic	NA
circRNA1122	-2.51272	down	0.385922	1	no	circRNA	CLNS1A, partial [Cervus elaphus hippelaphus]
circRNA1274	-1.51853	down	0.386013	1	no	intergenic	NA
circRNA1047	0.890345	up	0.386084	1	no	circRNA	SCD5 [Cervus elaphus hippelaphus]
circRNA2783	0.793508	up	0.387615	1	no	intergenic	NA
circRNA7	1.64164	up	0.388104	1	no	circRNA	hypothetical protein Celaphus_00013775, partial [Cervus elaphus hippelaphus]
circRNA1743	-0.678917	down	0.389048	1	no	intergenic	NA
circRNA772	-0.537079	down	0.389049	1	no	circRNA	TMPO [Cervus elaphus hippelaphus]
ciRNA95	-0.67249	down	0.389359	1	no	ciRNA	hypothetical protein Celaphus_00002974 [Cervus elaphus hippelaphus]
circRNA1823	1.53881	up	0.389469	1	no	intergenic	NA
circRNA2002	-0.693383	down	0.391199	1	no	intergenic	NA
circRNA2159	-0.70944	down	0.391384	1	no	intergenic	NA
circRNA1003	-0.9756	down	0.392703	1	no	circRNA	RAB27B [Cervus elaphus hippelaphus]
circRNA1704	0.570818	up	0.392778	1	no	intergenic	NA
circRNA2297	1.09034	up	0.394973	1	no	intergenic	NA
circRNA4144	-1.48978	down	0.395572	1	no	intergenic	NA
circRNA6402	-inf	down	0.396	1	no	circRNA	hypothetical protein Celaphus_00016430 [Cervus elaphus hippelaphus]
circRNA2964	0.556394	up	0.396302	1	no	intergenic	NA
circRNA990	0.684238	up	0.396394	1	no	circRNA	NFATC3, partial [Cervus elaphus hippelaphus]
circRNA6424	-inf	down	0.396424	1	no	circRNA	COG3 [Cervus elaphus hippelaphus]
circRNA2408	1.19508	up	0.396433	1	no	intergenic	NA
circRNA6492	-inf	down	0.396847	1	no	circRNA	CD2-associated protein isoform X1 [Odocoileus virginianus texanus]
ciRNA28	inf	up	0.396858	1	no	ciRNA	COL1A2 [Cervus elaphus hippelaphus]
circRNA164	inf	up	0.39728	1	no	circRNA	disintegrin and metalloproteinase domain-containing protein 17 [Odocoileus virginianus texanus]
circRNA1207	2.31761	up	0.397526	1	no	intergenic	NA
circRNA777	inf	up	0.397701	1	no	circRNA	ACTR6, partial [Cervus elaphus hippelaphus]
circRNA1638	1.94016	up	0.39782	1	no	intergenic	NA
circRNA4997	-2.48794	down	0.39786	1	no	circRNA	RSBN1, partial [Cervus elaphus hippelaphus]
circRNA1657	-1.14548	down	0.39787	1	no	intergenic	NA
circRNA966	-0.764087	down	0.398076	1	no	circRNA	hypothetical protein Celaphus_00019131, partial [Cervus elaphus hippelaphus]
circRNA3165	1.1632	up	0.398668	1	no	circRNA	hypothetical protein Celaphus_00018804, partial [Cervus elaphus hippelaphus]
circRNA1316	0.94249	up	0.399125	1	no	intergenic	NA
circRNA2557	0.511636	up	0.400645	1	no	intergenic	NA
circRNA2393	0.445419	up	0.401022	1	no	intergenic	NA
circRNA83	0.508598	up	0.401187	1	no	circRNA	LOW QUALITY PROTEIN: RNA-binding protein 5 [Carlito syrichta]
circRNA2906	0.774702	up	0.402092	1	no	intergenic	NA
circRNA1346	-0.98349	down	0.402249	1	no	intergenic	NA
circRNA1305	1.68164	up	0.402487	1	no	intergenic	NA
circRNA1916	1.68164	up	0.402606	1	no	intergenic	NA
circRNA2955	1.68164	up	0.402829	1	no	intergenic	NA
circRNA1640	-0.987564	down	0.402951	1	no	intergenic	NA
circRNA2580	-0.613353	down	0.403055	1	no	intergenic	NA
circRNA1913	1.2067	up	0.403138	1	no	intergenic	NA
circRNA2803	2.11303	up	0.40404	1	no	intergenic	NA
ciRNA252	1.67681	up	0.404786	1	no	ciRNA	hypothetical protein Celaphus_00015647 [Cervus elaphus hippelaphus]
circRNA878	2.17091	up	0.405086	1	no	circRNA	PRELI domain containing protein 3A [Odocoileus virginianus texanus]
circRNA3108	1.46289	up	0.4051	1	no	circRNA	COL1A1 [Cervus elaphus hippelaphus]
ciRNA124	0.619579	up	0.405512	1	no	ciRNA	ERO1B [Cervus elaphus hippelaphus]
circRNA2737	-1.33577	down	0.405558	1	no	intergenic	NA
circRNA3226	inf	up	0.405931	1	no	circRNA	SLC4A7 [Cervus elaphus hippelaphus]
circRNA3470	inf	up	0.406339	1	no	circRNA	PIAS3 [Cervus elaphus hippelaphus]
circRNA3511	inf	up	0.406746	1	no	circRNA	BACE2 [Cervus elaphus hippelaphus]
circRNA665	-0.772897	down	0.408025	1	no	circRNA	hypothetical protein Celaphus_00002522, partial [Cervus elaphus hippelaphus]
circRNA3869	-0.802058	down	0.408106	1	no	intergenic	NA
circRNA2121	1.51618	up	0.408247	1	no	intergenic	NA
circRNA414	-0.536477	down	0.408408	1	no	circRNA	PCSK7 [Cervus elaphus hippelaphus]
circRNA3191	2.11954	up	0.408939	1	no	circRNA	COL12A1 [Cervus elaphus hippelaphus]
circRNA6205	-inf	down	0.409351	1	no	circRNA	hypothetical protein Celaphus_00011280 [Cervus elaphus hippelaphus]
circRNA6246	-inf	down	0.409741	1	no	circRNA	Insulin-like growth factor-binding protein 4, partial [Bos mutus]
circRNA452	1.52088	up	0.409808	1	no	circRNA	UBE4B, partial [Cervus elaphus hippelaphus]
circRNA2915	0.580276	up	0.409975	1	no	intergenic	NA
circRNA6373	-inf	down	0.41013	1	no	circRNA	hypothetical protein Celaphus_00011817, partial [Cervus elaphus hippelaphus]
circRNA6114	-inf	down	0.410232	1	no	circRNA	kinesin-like protein KIF23 isoform X1 [Odocoileus virginianus texanus]
circRNA235	0.370719	up	0.410391	1	no	circRNA	KTN1 [Cervus elaphus hippelaphus]
circRNA6388	-inf	down	0.410518	1	no	circRNA	hypothetical protein Celaphus_00004456 [Cervus elaphus hippelaphus]
circRNA2855	0.523515	up	0.410571	1	no	intergenic	NA
circRNA2386	1.51906	up	0.410618	1	no	intergenic	NA
circRNA6420	-inf	down	0.410652	1	no	circRNA	hypothetical protein Celaphus_00017699 [Cervus elaphus hippelaphus]
ciRNA668	-1.60448	down	0.410884	1	no	ciRNA	hypothetical protein Celaphus_00011327, partial [Cervus elaphus hippelaphus]
circRNA3125	1.3757	up	0.411069	1	no	circRNA	hypothetical protein Celaphus_00015423, partial [Cervus elaphus hippelaphus]
circRNA7137	-inf	down	0.41107	1	no	circRNA	L3HYPDH [Cervus elaphus hippelaphus]
circRNA2244	0.875574	up	0.412002	1	no	intergenic	NA
circRNA1967	-0.661439	down	0.412312	1	no	intergenic	NA
circRNA3096	1.92531	up	0.412677	1	no	circRNA	hypothetical protein Celaphus_00013775, partial [Cervus elaphus hippelaphus]
circRNA1748	0.720024	up	0.413038	1	no	intergenic	NA
circRNA3117	-2.36912	down	0.413418	1	no	circRNA	ubiquitin carboxyl-terminal hydrolase 34 isoform X1 [Odocoileus virginianus texanus]
circRNA1046	-1.82186	down	0.413684	1	no	circRNA	TCAF1 [Cervus elaphus hippelaphus]
circRNA2392	0.567765	up	0.413955	1	no	intergenic	NA
circRNA1912	0.760038	up	0.414231	1	no	intergenic	NA
circRNA1772	0.833897	up	0.414537	1	no	intergenic	NA
circRNA403	-0.774871	down	0.414924	1	no	circRNA	hypothetical protein Celaphus_00012285 [Cervus elaphus hippelaphus]
circRNA639	0.519093	up	0.416113	1	no	circRNA	VPS45, partial [Cervus elaphus hippelaphus]
circRNA7360	-inf	down	0.416139	1	no	circRNA	SAFB2 [Cervus elaphus hippelaphus]
circRNA2452	0.88733	up	0.416302	1	no	intergenic	NA
circRNA1170	1.73625	up	0.417862	1	no	circRNA	OTUD4 [Cervus elaphus hippelaphus]
ciRNA17	inf	up	0.418061	1	no	ciRNA	MAN2A2 [Cervus elaphus hippelaphus]
circRNA4240	-1.32334	down	0.418346	1	no	intergenic	NA
ciRNA76	inf	up	0.418446	1	no	ciRNA	SMPD2 [Cervus elaphus hippelaphus]
circRNA129	-1.82835	down	0.418757	1	no	circRNA	GLUD1 [Cervus elaphus hippelaphus]
circRNA1758	-1.28908	down	0.418771	1	no	intergenic	NA
circRNA154	inf	up	0.418829	1	no	circRNA	GLE1 [Cervus elaphus hippelaphus]
circRNA464	inf	up	0.418862	1	no	circRNA	HMCN1, partial [Cervus elaphus hippelaphus]
circRNA280	inf	up	0.419082	1	no	circRNA	TSPAN3 [Cervus elaphus hippelaphus]
circRNA175	inf	up	0.419211	1	no	circRNA	HADHA [Cervus elaphus hippelaphus]
circRNA2702	1.39686	up	0.419757	1	no	intergenic	NA
circRNA680	-1.80405	down	0.419928	1	no	circRNA	EPHA2, partial [Cervus elaphus hippelaphus]
circRNA5363	-2.21993	down	0.42018	1	no	intergenic	NA
circRNA2836	-0.59192	down	0.420206	1	no	intergenic	NA
ciRNA32	inf	up	0.42038	1	no	ciRNA	NOL9, partial [Cervus elaphus hippelaphus]
circRNA4107	1.76745	up	0.420698	1	no	intergenic	NA
ciRNA70	inf	up	0.420759	1	no	ciRNA	collagen alpha-1(II) chain isoform X2 [Odocoileus virginianus texanus]
circRNA1096	inf	up	0.421137	1	no	circRNA	phosphatidylserine synthase 2 isoform X2 [Odocoileus virginianus texanus]
circRNA4268	-1.30695	down	0.421249	1	no	intergenic	NA
circRNA2582	-0.974809	down	0.421267	1	no	intergenic	NA
circRNA936	inf	up	0.421496	1	no	circRNA	N-acetylgalactosaminyltransferase 7 [Pteropus alecto]
circRNA204	inf	up	0.421514	1	no	circRNA	hypothetical protein Celaphus_00005807 [Cervus elaphus hippelaphus]
circRNA1083	1.05386	up	0.421796	1	no	circRNA	ANKRD39 [Cervus elaphus hippelaphus]
circRNA725	inf	up	0.421855	1	no	circRNA	importin subunit alpha-5 isoform X1 [Eptesicus fuscus]
circRNA390	inf	up	0.421889	1	no	circRNA	IFRD1 [Cervus elaphus hippelaphus]
ciRNA635	-1.37868	down	0.421977	1	no	ciRNA	hypothetical protein Celaphus_00006606 [Cervus elaphus hippelaphus]
circRNA2822	0.945419	up	0.423001	1	no	intergenic	NA
circRNA2931	0.868623	up	0.423542	1	no	intergenic	NA
circRNA2456	-0.98282	down	0.423837	1	no	intergenic	NA
ciRNA340	0.415133	up	0.424251	1	no	ciRNA	MYO10 [Cervus elaphus hippelaphus]
circRNA1854	0.610057	up	0.424337	1	no	intergenic	NA
circRNA1894	0.647694	up	0.424732	1	no	intergenic	NA
circRNA150	inf	up	0.424828	1	no	circRNA	PMPCA [Cervus elaphus hippelaphus]
circRNA847	inf	up	0.424828	1	no	circRNA	ZNF704, partial [Cervus elaphus hippelaphus]
circRNA3271	inf	up	0.426851	1	no	circRNA	hypothetical protein Celaphus_00005306 [Cervus elaphus hippelaphus]
circRNA7356	-inf	down	0.426863	1	no	circRNA	hypothetical protein Celaphus_00003058, partial [Cervus elaphus hippelaphus]
circRNA7222	-inf	down	0.427023	1	no	circRNA	BUB1B [Cervus elaphus hippelaphus]
circRNA643	2.60067	up	0.427149	1	no	circRNA	vesicle-trafficking protein SEC22b [Canis lupus familiaris]
circRNA7164	-inf	down	0.427182	1	no	circRNA	POC1A [Cervus elaphus hippelaphus]
circRNA3297	inf	up	0.427236	1	no	circRNA	unconventional myosin-Ie [Ovis aries]
circRNA1413	0.902222	up	0.427449	1	no	intergenic	NA
circRNA1374	1.21916	up	0.427535	1	no	intergenic	NA
circRNA3302	inf	up	0.42762	1	no	circRNA	MGA, partial [Cervus elaphus hippelaphus]
ciRNA223	1.16434	up	0.42798	1	no	ciRNA	CHSY1 [Cervus elaphus hippelaphus]
circRNA3347	inf	up	0.428002	1	no	circRNA	hypothetical protein Celaphus_00006957 [Cervus elaphus hippelaphus]
circRNA1088	1.31218	up	0.428106	1	no	circRNA	hypothetical protein Celaphus_00003373 [Cervus elaphus hippelaphus]
circRNA3483	inf	up	0.428264	1	no	circRNA	microtubule-associated serine/threonine-protein kinase 2 isoform X1 [Ovis aries]
circRNA3445	inf	up	0.428383	1	no	circRNA	DCTN4 [Cervus elaphus hippelaphus]
circRNA60	-1.31812	down	0.428432	1	no	circRNA	hypothetical protein Celaphus_00008075, partial [Cervus elaphus hippelaphus]
circRNA3510	inf	up	0.428637	1	no	circRNA	PRMT2 [Cervus elaphus hippelaphus]
circRNA3569	inf	up	0.429009	1	no	circRNA	oxysterol-binding protein-related protein 1 isoform X1 [Odocoileus virginianus texanus]
circRNA2952	1.18726	up	0.42929	1	no	intergenic	NA
circRNA3600	inf	up	0.429379	1	no	circRNA	TMEM8B [Cervus elaphus hippelaphus]
circRNA2099	1.28823	up	0.429382	1	no	intergenic	NA
circRNA4087	-1.76429	down	0.430044	1	no	intergenic	NA
circRNA6115	-inf	down	0.430829	1	no	circRNA	hypothetical protein Celaphus_00006610, partial [Cervus elaphus hippelaphus]
circRNA6059	-inf	down	0.431022	1	no	circRNA	SCD [Cervus elaphus hippelaphus]
circRNA3786	1.66644	up	0.431037	1	no	intergenic	NA
circRNA2023	0.774401	up	0.432048	1	no	intergenic	NA
ciRNA40	1.93131	up	0.432296	1	no	ciRNA	ACAP1 [Cervus elaphus hippelaphus]
circRNA380	2.2732	up	0.432336	1	no	circRNA	hypothetical protein Celaphus_00011935, partial [Cervus elaphus hippelaphus]
circRNA2740	0.806588	up	0.432709	1	no	intergenic	NA
circRNA5330	-1.13941	down	0.432768	1	no	intergenic	NA
circRNA2475	-1.98631	down	0.433082	1	no	intergenic	NA
circRNA11	1.22321	up	0.433161	1	no	circRNA	hypothetical protein Celaphus_00013851 [Cervus elaphus hippelaphus]
circRNA1326	-0.834364	down	0.434783	1	no	intergenic	NA
circRNA4172	-1.32709	down	0.434985	1	no	intergenic	NA
circRNA1776	1.16148	up	0.435127	1	no	intergenic	NA
ciRNA339	1.4098	up	0.435231	1	no	ciRNA	ADAMTS3 [Cervus elaphus hippelaphus]
circRNA1169	-1.12616	down	0.435755	1	no	circRNA	HOMER1 [Cervus elaphus hippelaphus]
circRNA471	2.33929	up	0.4366	1	no	circRNA	SGMS2 [Cervus elaphus hippelaphus]
circRNA2948	1.2408	up	0.43708	1	no	intergenic	NA
circRNA3592	-2.01529	down	0.437853	1	no	circRNA	N-acetylgalactosaminyltransferase 7 [Pteropus alecto]
circRNA126	-0.500943	down	0.438295	1	no	circRNA	VCL [Cervus elaphus hippelaphus]
circRNA5362	-2.32887	down	0.438932	1	no	intergenic	NA
circRNA1257	0.429081	up	0.441249	1	no	intergenic	NA
circRNA5040	-1.93965	down	0.441818	1	no	circRNA	PREDICTED: transmembrane protein 106B [Camelus bactrianus]
circRNA1628	0.748711	up	0.442083	1	no	intergenic	NA
circRNA730	2.26964	up	0.442527	1	no	circRNA	hypothetical protein Celaphus_00012807 [Cervus elaphus hippelaphus]
circRNA2863	0.601123	up	0.442576	1	no	intergenic	NA
ciRNA286	0.405029	up	0.442823	1	no	ciRNA	AIDA, partial [Cervus elaphus hippelaphus]
circRNA703	-0.538633	down	0.443332	1	no	circRNA	IDH1, partial [Cervus elaphus hippelaphus]
circRNA2403	-0.560939	down	0.443424	1	no	intergenic	NA
circRNA2959	-0.927141	down	0.443748	1	no	intergenic	NA
circRNA754	1.22314	up	0.443864	1	no	circRNA	hypothetical protein Celaphus_00019565, partial [Cervus elaphus hippelaphus]
circRNA2594	0.532443	up	0.445119	1	no	intergenic	NA
circRNA1396	0.772553	up	0.445172	1	no	intergenic	NA
circRNA2322	-1.32615	down	0.447081	1	no	intergenic	NA
circRNA3435	1.58937	up	0.447094	1	no	circRNA	RFX2 [Cervus elaphus hippelaphus]
circRNA2831	-0.576404	down	0.448459	1	no	intergenic	NA
circRNA1123	1.51632	up	0.44876	1	no	circRNA	hypothetical protein Celaphus_00005870, partial [Cervus elaphus hippelaphus]
circRNA1946	-1.7404	down	0.448835	1	no	intergenic	NA
circRNA2146	1.28113	up	0.449293	1	no	intergenic	NA
circRNA1405	-1.21169	down	0.44939	1	no	intergenic	NA
circRNA355	0.513151	up	0.449753	1	no	circRNA	LMF1 [Cervus elaphus hippelaphus]
circRNA1603	1.92959	up	0.450581	1	no	intergenic	NA
circRNA648	-1.50586	down	0.451007	1	no	circRNA	GSTM1 [Cervus elaphus hippelaphus]
circRNA3181	-0.686702	down	0.45212	1	no	circRNA	hypothetical protein Celaphus_00003107 [Cervus elaphus hippelaphus]
circRNA1119	-0.801246	down	0.45326	1	no	circRNA	hypothetical protein Celaphus_00012629, partial [Cervus elaphus hippelaphus]
circRNA308	0.486869	up	0.453268	1	no	circRNA	hypothetical protein Celaphus_00014323 [Cervus elaphus hippelaphus]
circRNA1701	1.06363	up	0.453633	1	no	intergenic	NA
circRNA950	-1.76723	down	0.454824	1	no	circRNA	hypothetical protein Celaphus_00018963 [Cervus elaphus hippelaphus]
circRNA1993	1.09703	up	0.455166	1	no	intergenic	NA
circRNA573	-1.38836	down	0.455576	1	no	circRNA	HAUS8 [Cervus elaphus hippelaphus]
circRNA2707	0.632121	up	0.455908	1	no	intergenic	NA
circRNA9	-3.11811	down	0.457457	1	no	circRNA	BCL2L13 [Cervus elaphus hippelaphus]
circRNA2981	-1.55962	down	0.457968	1	no	intergenic	NA
circRNA1939	0.4957	up	0.45815	1	no	intergenic	NA
ciRNA116	0.608777	up	0.458271	1	no	ciRNA	hypothetical protein Celaphus_00003398 [Cervus elaphus hippelaphus]
circRNA1570	-0.607872	down	0.458914	1	no	intergenic	NA
circRNA2273	-2.28037	down	0.458939	1	no	intergenic	NA
circRNA4017	1.66373	up	0.459419	1	no	intergenic	NA
circRNA294	0.653925	up	0.459719	1	no	circRNA	protein transport protein Sec23A [Ovis aries]
circRNA1834	-2.22119	down	0.459779	1	no	intergenic	NA
circRNA2377	1.09993	up	0.460576	1	no	intergenic	NA
circRNA2691	0.432955	up	0.460855	1	no	intergenic	NA
circRNA1338	0.394234	up	0.461485	1	no	intergenic	NA
circRNA429	1.93859	up	0.462399	1	no	circRNA	EIF3M [Cervus elaphus hippelaphus]
circRNA5920	-1.48843	down	0.462624	1	no	intergenic	NA
circRNA350	-0.6975	down	0.463058	1	no	circRNA	MED17 [Cervus elaphus hippelaphus]
ciRNA481	-0.805261	down	0.464617	1	no	ciRNA	NHLRC3 [Cervus elaphus hippelaphus]
circRNA1249	1.10411	up	0.465076	1	no	intergenic	NA
circRNA1525	1.46664	up	0.46519	1	no	intergenic	NA
circRNA4024	1.17313	up	0.465433	1	no	intergenic	NA
circRNA2361	2.08591	up	0.465653	1	no	intergenic	NA
circRNA2495	1.29222	up	0.46616	1	no	intergenic	NA
circRNA2840	-0.56944	down	0.466161	1	no	intergenic	NA
circRNA4525	-2.59853	down	0.466897	1	no	circRNA	GMCL1, partial [Cervus elaphus hippelaphus]
circRNA1610	0.391885	up	0.468152	1	no	intergenic	NA
circRNA2677	0.700841	up	0.468164	1	no	intergenic	NA
circRNA3139	-1.53719	down	0.468334	1	no	circRNA	PBRM1, partial [Cervus elaphus hippelaphus]
circRNA658	-2.64729	down	0.468619	1	no	circRNA	B-cell lymphoma/leukemia 10 [Papio anubis]
circRNA1428	-1.21207	down	0.468831	1	no	intergenic	NA
circRNA520	-2.64729	down	0.468944	1	no	circRNA	NF1, partial [Cervus elaphus hippelaphus]
circRNA2141	0.795009	up	0.469256	1	no	intergenic	NA
ciRNA240	0.518405	up	0.469438	1	no	ciRNA	STAM2, partial [Cervus elaphus hippelaphus]
circRNA3489	2.54758	up	0.46951	1	no	circRNA	hypothetical protein Celaphus_00014711 [Cervus elaphus hippelaphus]
ciRNA202	-1.67395	down	0.469706	1	no	ciRNA	hypothetical protein Celaphus_00011327, partial [Cervus elaphus hippelaphus]
circRNA98	0.741221	up	0.469716	1	no	circRNA	hypothetical protein Celaphus_00015973, partial [Cervus elaphus hippelaphus]
circRNA1184	1.02329	up	0.469878	1	no	circRNA	switch-associated protein 70 isoform X1 [Odocoileus virginianus texanus]
ciRNA106	0.700296	up	0.470105	1	no	ciRNA	MMP16, partial [Cervus elaphus hippelaphus]
circRNA2027	0.648723	up	0.470248	1	no	intergenic	NA
circRNA3115	1.68218	up	0.470422	1	no	circRNA	SNX29, partial [Cervus elaphus hippelaphus]
circRNA1398	1.46224	up	0.470461	1	no	intergenic	NA
circRNA1575	-0.63658	down	0.470554	1	no	intergenic	NA
circRNA1491	0.959006	up	0.471793	1	no	intergenic	NA
circRNA1695	0.443506	up	0.472136	1	no	intergenic	NA
circRNA1121	1.22997	up	0.472584	1	no	circRNA	OXSR1, partial [Cervus elaphus hippelaphus]
circRNA5056	-1.17243	down	0.472831	1	no	circRNA	TFB2M [Cervus elaphus hippelaphus]
circRNA1082	-1.38459	down	0.473214	1	no	circRNA	low density lipoprotein receptor adapter protein 1 [Odocoileus virginianus texanus]
circRNA3467	2.61367	up	0.473652	1	no	circRNA	VPS45, partial [Cervus elaphus hippelaphus]
circRNA4517	-2.58747	down	0.474635	1	no	circRNA	rab9 effector protein with kelch motifs isoform X2 [Neophocaena asiaeorientalis asiaeorientalis]
circRNA2116	1.64578	up	0.475182	1	no	intergenic	NA
circRNA4757	-2.6104	down	0.475341	1	no	circRNA	hypothetical protein Celaphus_00017275 [Cervus elaphus hippelaphus]
ciRNA454	-1.6641	down	0.475508	1	no	ciRNA	TRMT1 [Cervus elaphus hippelaphus]
circRNA15	-0.753464	down	0.475529	1	no	circRNA	PARP11 [Cervus elaphus hippelaphus]
circRNA2300	1.68877	up	0.475575	1	no	intergenic	NA
circRNA1390	-0.795687	down	0.475723	1	no	intergenic	NA
circRNA1634	-0.447317	down	0.475865	1	no	intergenic	NA
circRNA3186	-0.669122	down	0.475874	1	no	circRNA	HSF1 [Cervus elaphus hippelaphus]
circRNA201	-2.65826	down	0.476101	1	no	circRNA	RAB11FIP5 [Cervus elaphus hippelaphus]
circRNA198	2.52355	up	0.476482	1	no	circRNA	BIRC6, partial [Cervus elaphus hippelaphus]
circRNA2001	0.355163	up	0.4766	1	no	intergenic	NA
circRNA2418	1.52863	up	0.477115	1	no	intergenic	NA
circRNA2709	-1.52164	down	0.477409	1	no	intergenic	NA
circRNA2078	0.685477	up	0.477515	1	no	intergenic	NA
circRNA1702	1.10409	up	0.477549	1	no	intergenic	NA
circRNA2380	1.47864	up	0.477816	1	no	intergenic	NA
circRNA553	0.432674	up	0.47784	1	no	circRNA	MRC2 [Cervus elaphus hippelaphus]
circRNA3363	-2.35158	down	0.478256	1	no	circRNA	UBE3C [Cervus elaphus hippelaphus]
circRNA5677	-1.15839	down	0.478281	1	no	intergenic	NA
circRNA5713	-1.61475	down	0.479751	1	no	intergenic	NA
circRNA2439	0.410489	up	0.481775	1	no	intergenic	NA
circRNA1764	0.469831	up	0.48189	1	no	intergenic	NA
ciRNA429	-1.0213	down	0.481928	1	no	ciRNA	hypothetical protein Celaphus_00000476 [Cervus elaphus hippelaphus]
circRNA2426	0.632983	up	0.482261	1	no	intergenic	NA
circRNA1384	1.52126	up	0.482353	1	no	intergenic	NA
circRNA3638	-1.60093	down	0.482434	1	no	circRNA	PREDICTED: phosphatidylinositol 3-kinase regulatory subunit gamma isoform X2 [Ovis aries musimon]
circRNA2333	0.722107	up	0.482457	1	no	intergenic	NA
circRNA2793	-1.52309	down	0.482769	1	no	intergenic	NA
circRNA95	-2.64422	down	0.483116	1	no	circRNA	hypothetical protein Celaphus_00015776, partial [Cervus elaphus hippelaphus]
circRNA1595	0.684819	up	0.483338	1	no	intergenic	NA
circRNA624	-0.856334	down	0.483472	1	no	circRNA	hypothetical protein Celaphus_00001739 [Cervus elaphus hippelaphus]
circRNA1599	0.588344	up	0.483659	1	no	intergenic	NA
circRNA184	1.74556	up	0.484109	1	no	circRNA	GGCX [Cervus elaphus hippelaphus]
circRNA2843	1.53596	up	0.484584	1	no	intergenic	NA
circRNA79	2.48329	up	0.484865	1	no	circRNA	POC1A [Cervus elaphus hippelaphus]
circRNA2319	0.530513	up	0.485878	1	no	intergenic	NA
ciRNA311	0.985148	up	0.486364	1	no	ciRNA	hypothetical protein Celaphus_00012261, partial [Cervus elaphus hippelaphus]
circRNA1350	0.480044	up	0.486556	1	no	intergenic	NA
ciRNA275	0.314002	up	0.487891	1	no	ciRNA	SERPINF1, partial [Cervus elaphus hippelaphus]
circRNA1892	1.50352	up	0.488634	1	no	intergenic	NA
ciRNA690	-1.62199	down	0.489949	1	no	ciRNA	hypothetical protein Celaphus_00003931 [Cervus elaphus hippelaphus]
circRNA3843	-1.30351	down	0.490471	1	no	intergenic	NA
circRNA2042	0.406838	up	0.491234	1	no	intergenic	NA
circRNA5891	-1.3377	down	0.491413	1	no	intergenic	NA
circRNA3002	0.643086	up	0.49177	1	no	intergenic	NA
circRNA1898	0.3523	up	0.492221	1	no	intergenic	NA
circRNA478	-0.674648	down	0.493656	1	no	circRNA	hypothetical protein Celaphus_00018697 [Cervus elaphus hippelaphus]
circRNA2790	-0.521583	down	0.495594	1	no	intergenic	NA
circRNA997	-0.432878	down	0.49587	1	no	circRNA	MKX [Cervus elaphus hippelaphus]
circRNA1239	1.72935	up	0.496118	1	no	intergenic	NA
circRNA1729	-0.538776	down	0.496554	1	no	intergenic	NA
circRNA2143	-0.497297	down	0.498052	1	no	intergenic	NA
ciRNA232	0.653015	up	0.498349	1	no	ciRNA	hypothetical protein Celaphus_00004535, partial [Cervus elaphus hippelaphus]
circRNA2207	-0.827153	down	0.498713	1	no	intergenic	NA
circRNA2469	-1.19426	down	0.498747	1	no	intergenic	NA
circRNA2243	0.835032	up	0.499052	1	no	intergenic	NA
circRNA2711	1.698	up	0.499392	1	no	intergenic	NA
ciRNA145	1.07446	up	0.499824	1	no	ciRNA	SNX2, partial [Cervus elaphus hippelaphus]
circRNA1598	1.2023	up	0.500154	1	no	intergenic	NA
circRNA2838	0.382581	up	0.500276	1	no	intergenic	NA
circRNA1267	-0.713561	down	0.500724	1	no	intergenic	NA
circRNA635	-0.677508	down	0.50075	1	no	circRNA	PIP5K1A, partial [Cervus elaphus hippelaphus]
circRNA1011	-1.7653	down	0.501044	1	no	circRNA	KLC1 [Cervus elaphus hippelaphus]
circRNA3397	-1.57976	down	0.50124	1	no	circRNA	hypothetical protein Celaphus_00000103 [Cervus elaphus hippelaphus]
ciRNA168	0.739436	up	0.501447	1	no	ciRNA	FAT1, partial [Cervus elaphus hippelaphus]
circRNA4894	-1.81961	down	0.501755	1	no	circRNA	GRAMD1A [Cervus elaphus hippelaphus]
ciRNA348	-1.37441	down	0.502101	1	no	ciRNA	hypothetical protein Celaphus_00006610, partial [Cervus elaphus hippelaphus]
circRNA2188	-0.960326	down	0.502201	1	no	intergenic	NA
circRNA3989	1.09051	up	0.502203	1	no	intergenic	NA
circRNA1982	0.573597	up	0.502482	1	no	intergenic	NA
circRNA3075	-0.933459	down	0.503011	1	no	intergenic	NA
circRNA1363	0.924235	up	0.503212	1	no	intergenic	NA
circRNA932	0.705594	up	0.503456	1	no	circRNA	MYO10 [Cervus elaphus hippelaphus]
circRNA1038	0.959386	up	0.504064	1	no	circRNA	hypothetical protein Celaphus_00006024 [Cervus elaphus hippelaphus]
circRNA1738	0.431507	up	0.504124	1	no	intergenic	NA
ciRNA363	-2.23592	down	0.50425	1	no	ciRNA	LIPA, partial [Cervus elaphus hippelaphus]
circRNA3834	-1.56628	down	0.504547	1	no	intergenic	NA
circRNA628	-2.22857	down	0.505283	1	no	circRNA	DAP3, partial [Cervus elaphus hippelaphus]
circRNA5550	-1.88503	down	0.505405	1	no	intergenic	NA
circRNA1289	0.620454	up	0.505921	1	no	intergenic	NA
circRNA1420	2.10762	up	0.505955	1	no	intergenic	NA
ciRNA191	-1.34417	down	0.506144	1	no	ciRNA	LEMD3 [Cervus elaphus hippelaphus]
circRNA3219	-1.34294	down	0.506149	1	no	circRNA	glycerophosphocholine phosphodiesterase GPCPD1 isoform X2 [Bubalus bubalis]
circRNA2508	2.17371	up	0.506152	1	no	intergenic	NA
circRNA3504	-1.81138	down	0.506681	1	no	circRNA	SENP2 [Cervus elaphus hippelaphus]
ciRNA320	0.807954	up	0.506696	1	no	ciRNA	hypothetical protein Celaphus_00012630 [Cervus elaphus hippelaphus]
circRNA1357	0.832996	up	0.506705	1	no	intergenic	NA
circRNA2988	-1.09139	down	0.506823	1	no	intergenic	NA
circRNA2375	0.446699	up	0.507273	1	no	intergenic	NA
circRNA2229	1.37037	up	0.507703	1	no	intergenic	NA
circRNA1016	-1.03099	down	0.50772	1	no	circRNA	hypothetical protein Celaphus_00001876 [Cervus elaphus hippelaphus]
circRNA8	0.518312	up	0.50777	1	no	circRNA	PREDICTED: protein-methionine sulfoxide oxidase MICAL3 isoform X10 [Capra hircus]
circRNA530	-0.555507	down	0.508037	1	no	circRNA	hypothetical protein Celaphus_00000878 [Cervus elaphus hippelaphus]
circRNA1771	0.504005	up	0.508118	1	no	intergenic	NA
circRNA2877	-1.93379	down	0.508472	1	no	intergenic	NA
circRNA1352	-1.93379	down	0.508493	1	no	intergenic	NA
circRNA4103	1.23125	up	0.508973	1	no	intergenic	NA
circRNA2535	-1.93979	down	0.50927	1	no	intergenic	NA
circRNA5502	-1.879	down	0.509605	1	no	intergenic	NA
circRNA2878	0.548522	up	0.509771	1	no	intergenic	NA
circRNA2705	1.78316	up	0.51066	1	no	intergenic	NA
circRNA1468	0.688074	up	0.511289	1	no	intergenic	NA
circRNA2651	1.51911	up	0.511546	1	no	intergenic	NA
circRNA3662	-1.01181	down	0.511559	1	no	circRNA	PREDICTED: serine/threonine-protein phosphatase PP1-beta catalytic subunit [Panthera tigris altaica]
circRNA779	2.0845	up	0.511568	1	no	circRNA	host cell factor 2 isoform X3 [Odocoileus virginianus texanus]
circRNA1591	1.92959	up	0.512157	1	no	intergenic	NA
circRNA2041	1.92959	up	0.51232	1	no	intergenic	NA
circRNA2481	1.12668	up	0.512425	1	no	intergenic	NA
circRNA2221	1.92959	up	0.512451	1	no	intergenic	NA
ciRNA236	-0.381769	down	0.512844	1	no	ciRNA	BIN1, partial [Cervus elaphus hippelaphus]
circRNA3992	1.5461	up	0.51286	1	no	intergenic	NA
circRNA1694	-1.05163	down	0.513478	1	no	intergenic	NA
circRNA4417	1.55051	up	0.513556	1	no	circRNA	collagen alpha-1(III) chain [Odocoileus virginianus texanus]
circRNA1551	-0.409013	down	0.513959	1	no	intergenic	NA
ciRNA612	-1.79249	down	0.51398	1	no	ciRNA	PDGFRL, partial [Cervus elaphus hippelaphus]
circRNA3840	-0.811446	down	0.514025	1	no	intergenic	NA
circRNA2909	-0.680544	down	0.515048	1	no	intergenic	NA
circRNA26	1.09323	up	0.515066	1	no	circRNA	fatty acyl-CoA reductase 2 [Odocoileus virginianus texanus]
ciRNA329	1.10745	up	0.515122	1	no	ciRNA	ZC3H7A [Cervus elaphus hippelaphus]
ciRNA503	1.69781	up	0.515155	1	no	ciRNA	SOX6 [Cervus elaphus hippelaphus]
circRNA2422	-0.72238	down	0.515278	1	no	intergenic	NA
circRNA5692	-2.05495	down	0.515366	1	no	intergenic	NA
circRNA1424	1.06701	up	0.515891	1	no	intergenic	NA
circRNA4203	1.96482	up	0.516077	1	no	intergenic	NA
circRNA5341	-2.22133	down	0.516299	1	no	intergenic	NA
circRNA809	-1.19901	down	0.516319	1	no	circRNA	SLC6A2 [Cervus elaphus hippelaphus]
circRNA2136	-2.05404	down	0.516746	1	no	intergenic	NA
circRNA5364	-2.06073	down	0.516958	1	no	intergenic	NA
circRNA2183	-1.1077	down	0.5171	1	no	intergenic	NA
circRNA3997	2.12763	up	0.517343	1	no	intergenic	NA
circRNA2778	-0.530687	down	0.517443	1	no	intergenic	NA
circRNA2450	0.361226	up	0.517554	1	no	intergenic	NA
circRNA4023	-0.691987	down	0.518253	1	no	intergenic	NA
circRNA5995	-1.79017	down	0.518763	1	no	circRNA	hypothetical protein Celaphus_00013064 [Cervus elaphus hippelaphus]
circRNA5434	2.15304	up	0.518893	1	no	intergenic	NA
circRNA1301	0.413489	up	0.51931	1	no	intergenic	NA
ciRNA688	-1.73726	down	0.520067	1	no	ciRNA	ANKRD17 [Cervus elaphus hippelaphus]
circRNA1132	1.9219	up	0.520507	1	no	circRNA	hypothetical protein Celaphus_00001747 [Cervus elaphus hippelaphus]
circRNA2584	1.52724	up	0.52089	1	no	intergenic	NA
ciRNA230	1.59333	up	0.521	1	no	ciRNA	hypothetical protein Celaphus_00016354 [Cervus elaphus hippelaphus]
circRNA2731	1.72287	up	0.521275	1	no	intergenic	NA
circRNA3871	1.76214	up	0.521303	1	no	intergenic	NA
circRNA1822	0.894658	up	0.521723	1	no	intergenic	NA
circRNA1541	-1.41137	down	0.521941	1	no	intergenic	NA
circRNA3894	-2.04309	down	0.522383	1	no	intergenic	NA
ciRNA495	-2.03731	down	0.522643	1	no	ciRNA	CACNA1D, partial [Cervus elaphus hippelaphus]
circRNA1091	-0.46027	down	0.52316	1	no	circRNA	ADAMTS18 [Cervus elaphus hippelaphus]
circRNA3684	0.990863	up	0.523297	1	no	circRNA	FBXW4 [Cervus elaphus hippelaphus]
circRNA144	0.448949	up	0.523379	1	no	circRNA	WDR11 [Cervus elaphus hippelaphus]
ciRNA269	-0.531666	down	0.523749	1	no	ciRNA	UBL5 [Cervus elaphus hippelaphus]
circRNA2075	0.842081	up	0.524224	1	no	intergenic	NA
circRNA359	-0.846564	down	0.524387	1	no	circRNA	RRN3 [Cervus elaphus hippelaphus]
circRNA2787	-0.740822	down	0.524593	1	no	intergenic	NA
circRNA1593	-2.04571	down	0.525445	1	no	intergenic	NA
circRNA2664	0.59808	up	0.525556	1	no	intergenic	NA
circRNA2152	-2.05173	down	0.525606	1	no	intergenic	NA
circRNA840	0.571285	up	0.52594	1	no	circRNA	TBC1D31, partial [Cervus elaphus hippelaphus]
circRNA3289	-0.781582	down	0.526107	1	no	circRNA	NRDE2 [Cervus elaphus hippelaphus]
circRNA4634	-2.34209	down	0.526258	1	no	circRNA	ZW10 [Cervus elaphus hippelaphus]
ciRNA455	2.02429	up	0.526427	1	no	ciRNA	CDC27 [Cervus elaphus hippelaphus]
circRNA3332	1.9582	up	0.52644	1	no	circRNA	TNFRSF21 [Cervus elaphus hippelaphus]
circRNA3629	1.96702	up	0.526965	1	no	circRNA	hypothetical protein Celaphus_00004481, partial [Cervus elaphus hippelaphus]
circRNA472	1.56932	up	0.527015	1	no	circRNA	SGMS2 [Cervus elaphus hippelaphus]
ciRNA216	-0.658261	down	0.528661	1	no	ciRNA	CAMKK1 [Cervus elaphus hippelaphus]
circRNA798	0.739409	up	0.529232	1	no	circRNA	ADAMTS18 [Cervus elaphus hippelaphus]
circRNA1944	-0.869572	down	0.529449	1	no	intergenic	NA
circRNA4415	-1.90729	down	0.53001	1	no	circRNA	PREDICTED: serine/threonine-protein phosphatase 4 regulatory subunit 3A [Manis javanica]
circRNA2718	0.740352	up	0.530098	1	no	intergenic	NA
circRNA576	0.815934	up	0.53098	1	no	circRNA	hypothetical protein Celaphus_00003182 [Cervus elaphus hippelaphus]
circRNA2066	-0.643941	down	0.531106	1	no	intergenic	NA
circRNA3129	-0.565128	down	0.531462	1	no	circRNA	hypothetical protein Celaphus_00012805, partial [Cervus elaphus hippelaphus]
circRNA1007	-1.4897	down	0.531626	1	no	circRNA	PREDICTED: nucleoporin NUP53 [Equus przewalskii]
circRNA3016	-1.21726	down	0.533139	1	no	intergenic	NA
circRNA1081	-0.452113	down	0.533571	1	no	circRNA	ACTN4 [Cervus elaphus hippelaphus]
circRNA702	1.17177	up	0.534082	1	no	circRNA	ARPC2 [Cervus elaphus hippelaphus]
ciRNA332	1.82619	up	0.534189	1	no	ciRNA	hypothetical protein Celaphus_00001704 [Cervus elaphus hippelaphus]
circRNA2690	0.999529	up	0.534535	1	no	intergenic	NA
circRNA2465	0.300618	up	0.534697	1	no	intergenic	NA
circRNA2419	-0.466817	down	0.535711	1	no	intergenic	NA
circRNA2728	1.62874	up	0.535711	1	no	intergenic	NA
circRNA1190	1.32787	up	0.53593	1	no	intergenic	NA
circRNA1921	0.480694	up	0.53602	1	no	intergenic	NA
ciRNA740	-1.02726	down	0.536309	1	no	ciRNA	MTBP [Cervus elaphus hippelaphus]
circRNA1486	0.416617	up	0.536392	1	no	intergenic	NA
circRNA768	-2.39085	down	0.53684	1	no	circRNA	TBK1, partial [Cervus elaphus hippelaphus]
circRNA1433	-0.676901	down	0.537245	1	no	intergenic	NA
circRNA4511	-2.37745	down	0.539484	1	no	circRNA	GLRX3 [Cervus elaphus hippelaphus]
circRNA2285	0.730282	up	0.539823	1	no	intergenic	NA
circRNA1935	0.855558	up	0.540565	1	no	intergenic	NA
circRNA4411	-0.863938	down	0.540713	1	no	circRNA	DLAT, partial [Cervus elaphus hippelaphus]
circRNA4228	1.55247	up	0.540792	1	no	intergenic	NA
circRNA2983	0.781506	up	0.54095	1	no	intergenic	NA
ciRNA333	0.376158	up	0.54129	1	no	ciRNA	hypothetical protein Celaphus_00005314, partial [Cervus elaphus hippelaphus]
circRNA4402	-1.77374	down	0.54159	1	no	circRNA	ARHGEF12 [Cervus elaphus hippelaphus]
circRNA819	0.806024	up	0.542012	1	no	circRNA	hypothetical protein Celaphus_00004304, partial [Cervus elaphus hippelaphus]
circRNA385	-1.17762	down	0.542202	1	no	circRNA	LAMB1, partial [Cervus elaphus hippelaphus]
circRNA683	2.26607	up	0.543107	1	no	circRNA	hypothetical protein Celaphus_00014711 [Cervus elaphus hippelaphus]
circRNA3461	-0.868039	down	0.5433	1	no	circRNA	DCUN1D4, partial [Cervus elaphus hippelaphus]
circRNA4789	-2.35518	down	0.543394	1	no	circRNA	cysteine protease ATG4C isoform X1 [Odocoileus virginianus texanus]
circRNA898	-2.42621	down	0.54343	1	no	circRNA	SETDB2 [Cervus elaphus hippelaphus]
circRNA5802	-0.923349	down	0.543817	1	no	intergenic	NA
circRNA917	0.420418	up	0.544022	1	no	circRNA	TNPO1, partial [Cervus elaphus hippelaphus]
circRNA4857	-2.38208	down	0.54627	1	no	circRNA	BOC, partial [Cervus elaphus hippelaphus]
circRNA1973	-1.18764	down	0.546646	1	no	intergenic	NA
circRNA2008	0.633688	up	0.546897	1	no	intergenic	NA
circRNA765	-1.19536	down	0.547033	1	no	circRNA	CNOT2, partial [Cervus elaphus hippelaphus]
circRNA2134	-0.441099	down	0.547685	1	no	intergenic	NA
ciRNA197	0.408151	up	0.547734	1	no	ciRNA	VRK1, partial [Cervus elaphus hippelaphus]
circRNA2563	0.748481	up	0.548158	1	no	intergenic	NA
circRNA975	0.876298	up	0.548627	1	no	circRNA	hypothetical protein Celaphus_00012451, partial [Cervus elaphus hippelaphus]
circRNA1980	-0.516505	down	0.548963	1	no	intergenic	NA
circRNA2318	0.708802	up	0.549746	1	no	intergenic	NA
circRNA3897	1.07605	up	0.5502	1	no	intergenic	NA
circRNA712	2.33323	up	0.551188	1	no	circRNA	USP13 [Cervus elaphus hippelaphus]
circRNA2362	0.326332	up	0.551285	1	no	intergenic	NA
ciRNA432	-1.13856	down	0.551447	1	no	ciRNA	TBC1D12 [Cervus elaphus hippelaphus]
circRNA127	-1.19384	down	0.551886	1	no	circRNA	VDAC2, partial [Cervus elaphus hippelaphus]
circRNA4485	-2.37282	down	0.552734	1	no	circRNA	TSPAN7 [Cervus elaphus hippelaphus]
circRNA1517	0.949612	up	0.553077	1	no	intergenic	NA
circRNA2558	1.21581	up	0.55308	1	no	intergenic	NA
circRNA4614	-2.37282	down	0.553169	1	no	circRNA	PREDICTED: trinucleotide repeat-containing gene 6A protein isoform X2 [Vicugna pacos]
circRNA1030	-0.476607	down	0.553888	1	no	circRNA	EPHB4 [Cervus elaphus hippelaphus]
circRNA4375	1.31721	up	0.554035	1	no	intergenic	NA
circRNA422	0.343331	up	0.554567	1	no	circRNA	hypothetical protein Celaphus_00009089, partial [Cervus elaphus hippelaphus]
circRNA1448	1.42086	up	0.554922	1	no	intergenic	NA
circRNA3088	-0.656391	down	0.55556	1	no	intergenic	NA
circRNA1335	0.688134	up	0.555888	1	no	intergenic	NA
circRNA989	-0.540981	down	0.555954	1	no	circRNA	NFATC3, partial [Cervus elaphus hippelaphus]
ciRNA362	0.685562	up	0.556396	1	no	ciRNA	PREDICTED: zinc finger MYM-type protein 4 [Cebus capucinus imitator]
circRNA2882	-0.466974	down	0.557458	1	no	intergenic	NA
circRNA353	2.23075	up	0.557468	1	no	circRNA	MED17 [Cervus elaphus hippelaphus]
circRNA3294	-2.36444	down	0.557964	1	no	circRNA	fermitin family homolog 2 [Bos taurus]
circRNA1260	0.913084	up	0.55805	1	no	intergenic	NA
circRNA3402	-1.19631	down	0.560547	1	no	circRNA	ATP6V0A2 [Cervus elaphus hippelaphus]
circRNA2511	-0.897109	down	0.560891	1	no	intergenic	NA
circRNA3062	-0.664633	down	0.562089	1	no	intergenic	NA
circRNA2230	-0.549946	down	0.563135	1	no	intergenic	NA
circRNA4185	1.48733	up	0.563151	1	no	intergenic	NA
circRNA1320	-0.586758	down	0.563162	1	no	intergenic	NA
circRNA1437	0.526306	up	0.563236	1	no	intergenic	NA
circRNA2250	-0.479987	down	0.563552	1	no	intergenic	NA
circRNA2940	1.1182	up	0.563738	1	no	intergenic	NA
circRNA2316	-1.5026	down	0.56414	1	no	intergenic	NA
circRNA1221	-1.79929	down	0.564333	1	no	intergenic	NA
circRNA3095	0.61717	up	0.564886	1	no	circRNA	hypothetical protein Celaphus_00014967, partial [Cervus elaphus hippelaphus]
circRNA3107	1.38236	up	0.565215	1	no	circRNA	COL1A1 [Cervus elaphus hippelaphus]
circRNA3947	1.44909	up	0.565513	1	no	intergenic	NA
circRNA2398	0.388867	up	0.565915	1	no	intergenic	NA
ciRNA314	1.74237	up	0.568295	1	no	ciRNA	NBAS [Cervus elaphus hippelaphus]
circRNA436	-2.66915	down	0.568487	1	no	circRNA	low-density lipoprotein receptor-related protein 4 [Camelus ferus]
circRNA2801	-2.41692	down	0.569347	1	no	intergenic	NA
circRNA517	-1.27079	down	0.569444	1	no	circRNA	zinc finger protein [Cricetulus griseus]
circRNA2534	0.588084	up	0.57072	1	no	intergenic	NA
circRNA5742	2.25257	up	0.571226	1	no	intergenic	NA
circRNA3197	0.471486	up	0.571399	1	no	circRNA	SNX4 [Cervus elaphus hippelaphus]
circRNA891	0.247491	up	0.571624	1	no	circRNA	TPT1, partial [Cervus elaphus hippelaphus]
circRNA2190	0.526985	up	0.571874	1	no	intergenic	NA
circRNA727	-2.06232	down	0.572002	1	no	circRNA	TMEM39A [Cervus elaphus hippelaphus]
ciRNA294	0.951806	up	0.572027	1	no	ciRNA	hypothetical protein Celaphus_00001222 [Cervus elaphus hippelaphus]
circRNA2635	-2.06232	down	0.572364	1	no	intergenic	NA
circRNA1531	-0.507399	down	0.572375	1	no	intergenic	NA
ciRNA81	0.379577	up	0.572549	1	no	ciRNA	hypothetical protein Celaphus_00013851 [Cervus elaphus hippelaphus]
ciRNA520	1.05921	up	0.572721	1	no	ciRNA	hypothetical protein Celaphus_00011632 [Cervus elaphus hippelaphus]
circRNA1209	-0.769426	down	0.573334	1	no	intergenic	NA
circRNA2176	0.276442	up	0.574429	1	no	intergenic	NA
ciRNA493	-1.99593	down	0.574826	1	no	ciRNA	E2F3 [Cervus elaphus hippelaphus]
circRNA2812	-0.818084	down	0.575198	1	no	intergenic	NA
circRNA1678	0.519013	up	0.575287	1	no	intergenic	NA
circRNA2156	-1.69284	down	0.57624	1	no	intergenic	NA
circRNA5860	-2.0218	down	0.576543	1	no	intergenic	NA
ciRNA231	-0.515626	down	0.576834	1	no	ciRNA	BCL2L13 [Cervus elaphus hippelaphus]
ciRNA335	1.58335	up	0.576953	1	no	ciRNA	EPHA2, partial [Cervus elaphus hippelaphus]
circRNA2662	-0.570437	down	0.577137	1	no	intergenic	NA
circRNA1435	-0.505436	down	0.57721	1	no	intergenic	NA
circRNA2518	-0.60215	down	0.577657	1	no	intergenic	NA
circRNA2278	-0.64188	down	0.577807	1	no	intergenic	NA
circRNA5534	-1.64152	down	0.577915	1	no	intergenic	NA
ciRNA764	-inf	down	0.578092	1	no	ciRNA	mitochondrial inner membrane protein OXA1L [Odocoileus virginianus texanus]
circRNA6012	-inf	down	0.578441	1	no	circRNA	CSRP2BP [Cervus elaphus hippelaphus]
circRNA3754	1.54856	up	0.578504	1	no	intergenic	NA
circRNA6055	-inf	down	0.578789	1	no	circRNA	hypothetical protein Celaphus_00008317, partial [Cervus elaphus hippelaphus]
circRNA2330	0.437046	up	0.578793	1	no	intergenic	NA
circRNA6143	-inf	down	0.579135	1	no	circRNA	ATL3 [Cervus elaphus hippelaphus]
circRNA6349	-inf	down	0.579153	1	no	circRNA	POGLUT1, partial [Cervus elaphus hippelaphus]
circRNA6318	-inf	down	0.579165	1	no	circRNA	PREDICTED: LOW QUALITY PROTEIN: PERQ amino acid-rich with GYF domain-containing protein 2 [Lipotes vexillifer]
circRNA6289	-inf	down	0.579177	1	no	circRNA	SRP72 [Cervus elaphus hippelaphus]
circRNA2455	-0.475956	down	0.579243	1	no	intergenic	NA
circRNA1351	0.528757	up	0.579466	1	no	intergenic	NA
circRNA6188	-inf	down	0.57948	1	no	circRNA	CKAP5 [Cervus elaphus hippelaphus]
circRNA6379	-inf	down	0.579499	1	no	circRNA	HEATR3 [Cervus elaphus hippelaphus]
circRNA6282	-inf	down	0.579504	1	no	circRNA	RARS, partial [Cervus elaphus hippelaphus]
circRNA6272	-inf	down	0.579823	1	no	circRNA	low-density lipoprotein receptor [Odocoileus virginianus texanus]
circRNA6394	-inf	down	0.579843	1	no	circRNA	HAS2, partial [Cervus elaphus hippelaphus]
circRNA2069	0.544834	up	0.580386	1	no	intergenic	NA
circRNA2272	-1.16847	down	0.580557	1	no	intergenic	NA
circRNA155	-1.69027	down	0.58074	1	no	circRNA	cip1-interacting zinc finger protein isoform X1 [Odocoileus virginianus texanus]
circRNA192	inf	up	0.580743	1	no	circRNA	PSME4, partial [Cervus elaphus hippelaphus]
circRNA407	inf	up	0.580745	1	no	circRNA	histone-lysine N-methyltransferase 2C isoform X15 [Odocoileus virginianus texanus]
ciRNA68	inf	up	0.580749	1	no	ciRNA	hypothetical protein Celaphus_00011532 [Cervus elaphus hippelaphus]
ciRNA62	inf	up	0.580754	1	no	ciRNA	hypothetical protein Celaphus_00012547 [Cervus elaphus hippelaphus]
circRNA3000	-0.400709	down	0.580754	1	no	intergenic	NA
circRNA2474	-1.49787	down	0.580853	1	no	intergenic	NA
circRNA853	inf	up	0.581066	1	no	circRNA	RAD54B, partial [Cervus elaphus hippelaphus]
circRNA451	inf	up	0.581082	1	no	circRNA	UBE4B, partial [Cervus elaphus hippelaphus]
ciRNA220	0.434731	up	0.581105	1	no	ciRNA	SIRT2 [Cervus elaphus hippelaphus]
circRNA835	inf	up	0.581153	1	no	circRNA	TRIM28, partial [Cervus elaphus hippelaphus]
circRNA814	inf	up	0.58124	1	no	circRNA	PRMT7, partial [Cervus elaphus hippelaphus]
circRNA755	inf	up	0.581328	1	no	circRNA	CD200 [Cervus elaphus hippelaphus]
circRNA709	inf	up	0.581417	1	no	circRNA	ACTL6A, partial [Cervus elaphus hippelaphus]
circRNA1521	1.5725	up	0.581511	1	no	intergenic	NA
circRNA3143	1.74043	up	0.581788	1	no	circRNA	SLC35B4 [Cervus elaphus hippelaphus]
circRNA156	0.495533	up	0.582107	1	no	circRNA	hypothetical protein Celaphus_00005210 [Cervus elaphus hippelaphus]
circRNA3280	inf	up	0.582459	1	no	circRNA	SPAST [Cervus elaphus hippelaphus]
circRNA4795	-1.45902	down	0.582593	1	no	circRNA	NASP, partial [Cervus elaphus hippelaphus]
circRNA3319	inf	up	0.582807	1	no	circRNA	hypothetical protein Celaphus_00015293, partial [Cervus elaphus hippelaphus]
circRNA782	1.51756	up	0.582841	1	no	circRNA	ALDH1L2, partial [Cervus elaphus hippelaphus]
ciRNA399	inf	up	0.582841	1	no	ciRNA	hypothetical protein Celaphus_00001000 [Cervus elaphus hippelaphus]
circRNA3221	inf	up	0.582909	1	no	circRNA	hypothetical protein Celaphus_00007908 [Cervus elaphus hippelaphus]
circRNA3384	inf	up	0.583153	1	no	circRNA	UBE4B, partial [Cervus elaphus hippelaphus]
ciRNA83	0.982182	up	0.583434	1	no	ciRNA	ZFYVE26, partial [Cervus elaphus hippelaphus]
circRNA3385	inf	up	0.583499	1	no	circRNA	UBE4B, partial [Cervus elaphus hippelaphus]
circRNA3436	inf	up	0.583842	1	no	circRNA	NFIC, partial [Cervus elaphus hippelaphus]
circRNA3443	inf	up	0.584185	1	no	circRNA	PREDICTED: HMG domain-containing protein 3 [Camelus bactrianus]
circRNA920	0.457985	up	0.584344	1	no	circRNA	NNT, partial [Cervus elaphus hippelaphus]
circRNA886	-0.58567	down	0.584415	1	no	circRNA	WD repeat-containing protein 7 isoform X2 [Odocoileus virginianus texanus]
circRNA3455	inf	up	0.584526	1	no	circRNA	ZBTB49 [Cervus elaphus hippelaphus]
circRNA3463	inf	up	0.584866	1	no	circRNA	FRYL, partial [Cervus elaphus hippelaphus]
circRNA3496	inf	up	0.585205	1	no	circRNA	FN1 [Cervus elaphus hippelaphus]
circRNA3516	inf	up	0.585542	1	no	circRNA	URB1, partial [Cervus elaphus hippelaphus]
circRNA3693	1.76871	up	0.58561	1	no	intergenic	NA
circRNA81	0.909355	up	0.58564	1	no	circRNA	USP4 [Cervus elaphus hippelaphus]
circRNA5298	-1.82641	down	0.58571	1	no	intergenic	NA
circRNA3038	1.74119	up	0.585804	1	no	intergenic	NA
circRNA2752	1.80729	up	0.585907	1	no	intergenic	NA
circRNA2109	0.57044	up	0.585996	1	no	intergenic	NA
circRNA2818	-0.364845	down	0.586884	1	no	intergenic	NA
circRNA1828	1.3453	up	0.58772	1	no	intergenic	NA
circRNA3691	1.8348	up	0.587751	1	no	intergenic	NA
circRNA2235	0.312402	up	0.587956	1	no	intergenic	NA
circRNA718	-0.809911	down	0.588137	1	no	circRNA	TFRC [Cervus elaphus hippelaphus]
circRNA5154	-1.80669	down	0.588485	1	no	intergenic	NA
circRNA839	0.890103	up	0.588599	1	no	circRNA	TBC1D31, partial [Cervus elaphus hippelaphus]
circRNA2850	1.50095	up	0.588706	1	no	intergenic	NA
circRNA3688	1.09002	up	0.589523	1	no	intergenic	NA
circRNA2524	-0.599554	down	0.589527	1	no	intergenic	NA
circRNA788	0.711346	up	0.58981	1	no	circRNA	GTF2E2, partial [Cervus elaphus hippelaphus]
circRNA1254	1.33051	up	0.589828	1	no	intergenic	NA
circRNA820	inf	up	0.589979	1	no	circRNA	PHLPP2, partial [Cervus elaphus hippelaphus]
circRNA953	inf	up	0.590024	1	no	circRNA	MTFR2 [Cervus elaphus hippelaphus]
circRNA794	inf	up	0.590084	1	no	circRNA	FNTA, partial [Cervus elaphus hippelaphus]
circRNA761	inf	up	0.590189	1	no	circRNA	disco-interacting protein 2 homolog B isoform X2 [Bubalus bubalis]
circRNA182	inf	up	0.590295	1	no	circRNA	APLF, partial [Cervus elaphus hippelaphus]
circRNA6328	-inf	down	0.590295	1	no	circRNA	TCEB3, partial [Cervus elaphus hippelaphus]
circRNA6245	-inf	down	0.590334	1	no	circRNA	NPEPPS, partial [Cervus elaphus hippelaphus]
circRNA6148	-inf	down	0.590345	1	no	circRNA	NARS2, partial [Cervus elaphus hippelaphus]
ciRNA788	-inf	down	0.59036	1	no	ciRNA	hypothetical protein Celaphus_00000247 [Cervus elaphus hippelaphus]
circRNA6126	-inf	down	0.590459	1	no	circRNA	protein transport protein Sec23A [Ovis aries]
circRNA257	1.72646	up	0.590459	1	no	circRNA	hypothetical protein Celaphus_00006606 [Cervus elaphus hippelaphus]
circRNA7408	-inf	down	0.590497	1	no	circRNA	USP13 [Cervus elaphus hippelaphus]
circRNA6072	-inf	down	0.590573	1	no	circRNA	intraflagellar transport protein 172 homolog isoform X1 [Zalophus californianus]
circRNA7257	-inf	down	0.590603	1	no	circRNA	CLIP2, partial [Cervus elaphus hippelaphus]
circRNA6342	-inf	down	0.590629	1	no	circRNA	NDUFS1 [Cervus elaphus hippelaphus]
circRNA6258	-inf	down	0.590645	1	no	circRNA	phosphoribosyl pyrophosphate synthase-associated protein 1 isoform X1 [Odocoileus virginianus texanus]
circRNA291	0.487194	up	0.590654	1	no	circRNA	KIAA0391, partial [Cervus elaphus hippelaphus]
circRNA6062	-inf	down	0.590685	1	no	circRNA	hypothetical protein Celaphus_00008780, partial [Cervus elaphus hippelaphus]
circRNA6069	-inf	down	0.590687	1	no	circRNA	NBAS [Cervus elaphus hippelaphus]
circRNA3815	-1.79855	down	0.590724	1	no	intergenic	NA
circRNA1787	0.619856	up	0.590824	1	no	intergenic	NA
circRNA3026	-0.585993	down	0.591713	1	no	intergenic	NA
ciRNA494	1.83227	up	0.592195	1	no	ciRNA	SPATA6, partial [Cervus elaphus hippelaphus]
ciRNA235	-1.27929	down	0.592247	1	no	ciRNA	hypothetical protein Celaphus_00012663, partial [Cervus elaphus hippelaphus]
circRNA1337	0.643557	up	0.59239	1	no	intergenic	NA
circRNA1964	-1.9156	down	0.592946	1	no	intergenic	NA
circRNA2546	1.70853	up	0.593246	1	no	intergenic	NA
circRNA2809	-1.85545	down	0.593664	1	no	intergenic	NA
ciRNA242	1.24405	up	0.593929	1	no	ciRNA	hypothetical protein Celaphus_00001235 [Cervus elaphus hippelaphus]
ciRNA150	0.594712	up	0.595274	1	no	ciRNA	hypothetical protein Celaphus_00002864 [Cervus elaphus hippelaphus]
circRNA4192	1.74811	up	0.5954	1	no	intergenic	NA
ciRNA346	0.415749	up	0.595637	1	no	ciRNA	NDUFA9, partial [Cervus elaphus hippelaphus]
circRNA431	-0.456099	down	0.597021	1	no	circRNA	CAPRIN1 [Cervus elaphus hippelaphus]
circRNA2494	-0.599128	down	0.597126	1	no	intergenic	NA
circRNA838	-1.30078	down	0.597638	1	no	circRNA	TBC1D31, partial [Cervus elaphus hippelaphus]
circRNA3841	1.75062	up	0.598709	1	no	intergenic	NA
ciRNA94	0.57627	up	0.599144	1	no	ciRNA	OLA1 [Cervus elaphus hippelaphus]
ciRNA599	-1.47865	down	0.599464	1	no	ciRNA	PREDICTED: uncharacterized protein C3orf38 homolog isoform X2 [Capra hircus]
ciRNA121	-1.12047	down	0.600328	1	no	ciRNA	hypothetical protein Celaphus_00016887 [Cervus elaphus hippelaphus]
circRNA2704	-0.695513	down	0.600418	1	no	intergenic	NA
circRNA2714	0.631758	up	0.601912	1	no	intergenic	NA
circRNA409	1.19198	up	0.601938	1	no	circRNA	UBE3C [Cervus elaphus hippelaphus]
circRNA1806	-0.433422	down	0.602395	1	no	intergenic	NA
circRNA3512	1.04241	up	0.602681	1	no	circRNA	BACE2 [Cervus elaphus hippelaphus]
circRNA3215	-1.37134	down	0.602686	1	no	circRNA	CSRP2BP [Cervus elaphus hippelaphus]
circRNA1700	0.29153	up	0.602911	1	no	intergenic	NA
circRNA4507	-2.56511	down	0.603387	1	no	circRNA	SEC23IP [Cervus elaphus hippelaphus]
circRNA4973	-2.56511	down	0.603469	1	no	circRNA	PREDICTED: bifunctional UDP-N-acetylglucosamine 2-epimerase/N-acetylmannosamine kinase isoform X1 [Ovis aries musimon]
circRNA3077	1.51146	up	0.603508	1	no	intergenic	NA
circRNA5213	-1.20233	down	0.603529	1	no	intergenic	NA
circRNA873	-0.676262	down	0.603614	1	no	circRNA	TAF4B, partial [Cervus elaphus hippelaphus]
circRNA4692	2.82721	up	0.603654	1	no	circRNA	ARFIP1, partial [Cervus elaphus hippelaphus]
circRNA1755	0.220727	up	0.603779	1	no	intergenic	NA
circRNA142	1.99568	up	0.603886	1	no	circRNA	SEC23IP [Cervus elaphus hippelaphus]
circRNA3755	1.02049	up	0.60392	1	no	intergenic	NA
circRNA423	-1.66698	down	0.604249	1	no	circRNA	hypothetical protein Celaphus_00009156 [Cervus elaphus hippelaphus]
circRNA2017	0.541315	up	0.604577	1	no	intergenic	NA
ciRNA350	1.01006	up	0.605064	1	no	ciRNA	hypothetical protein Celaphus_00000655 [Cervus elaphus hippelaphus]
circRNA5870	-0.788347	down	0.605166	1	no	intergenic	NA
ciRNA237	0.936227	up	0.605392	1	no	ciRNA	hypothetical protein Celaphus_00007230 [Cervus elaphus hippelaphus]
circRNA4182	1.09312	up	0.60558	1	no	intergenic	NA
circRNA209	0.700824	up	0.605711	1	no	circRNA	PSMD5 [Cervus elaphus hippelaphus]
circRNA3074	0.541089	up	0.606179	1	no	intergenic	NA
circRNA894	-1.60265	down	0.606919	1	no	circRNA	COG3 [Cervus elaphus hippelaphus]
circRNA3833	-0.704856	down	0.607483	1	no	intergenic	NA
circRNA661	1.11895	up	0.607827	1	no	circRNA	LRRC40 [Cervus elaphus hippelaphus]
circRNA2755	-0.37478	down	0.608117	1	no	intergenic	NA
circRNA3029	0.843128	up	0.608913	1	no	intergenic	NA
circRNA2369	0.281645	up	0.609254	1	no	intergenic	NA
circRNA510	1.37224	up	0.610118	1	no	circRNA	ATP-binding cassette sub-family E member 1 [Ictidomys tridecemlineatus]
circRNA2853	0.858637	up	0.610282	1	no	intergenic	NA
circRNA5723	-1.14806	down	0.610887	1	no	intergenic	NA
circRNA586	1.94173	up	0.611093	1	no	circRNA	CLPP [Cervus elaphus hippelaphus]
circRNA3057	0.652224	up	0.611304	1	no	intergenic	NA
circRNA4570	-2.02999	down	0.611563	1	no	circRNA	UNC45A [Cervus elaphus hippelaphus]
circRNA4600	-2.02999	down	0.61159	1	no	circRNA	DAGLA [Cervus elaphus hippelaphus]
circRNA2573	0.456985	up	0.611772	1	no	intergenic	NA
circRNA5042	-1.21216	down	0.61179	1	no	circRNA	hypothetical protein Celaphus_00016721, partial [Cervus elaphus hippelaphus]
circRNA2438	-0.93793	down	0.611974	1	no	intergenic	NA
circRNA1344	1.11558	up	0.612362	1	no	intergenic	NA
circRNA2637	-1.51875	down	0.612438	1	no	intergenic	NA
circRNA4273	0.870878	up	0.613887	1	no	intergenic	NA
circRNA3517	2.0287	up	0.613994	1	no	circRNA	PREDICTED: ubiquitin carboxyl-terminal hydrolase 25-like [Pantholops hodgsonii]
circRNA3248	1.9582	up	0.614758	1	no	circRNA	hypothetical protein Celaphus_00008147, partial [Cervus elaphus hippelaphus]
circRNA2011	0.330941	up	0.615348	1	no	intergenic	NA
circRNA1968	0.797017	up	0.615764	1	no	intergenic	NA
circRNA1790	1.70806	up	0.615848	1	no	intergenic	NA
ciRNA96	1.28905	up	0.616172	1	no	ciRNA	hypothetical protein Celaphus_00003145, partial [Cervus elaphus hippelaphus]
circRNA2609	-0.921695	down	0.616213	1	no	intergenic	NA
circRNA3331	-1.61832	down	0.616276	1	no	circRNA	radial spoke head protein 9 homolog isoform X3 [Odocoileus virginianus texanus]
circRNA1450	-1.1991	down	0.616285	1	no	intergenic	NA
circRNA2548	1.18306	up	0.61762	1	no	intergenic	NA
circRNA1805	0.528783	up	0.617631	1	no	intergenic	NA
circRNA256	0.186351	up	0.61797	1	no	circRNA	DPP8 [Cervus elaphus hippelaphus]
circRNA3746	-1.32665	down	0.617977	1	no	intergenic	NA
circRNA4559	-1.65049	down	0.618372	1	no	circRNA	hypothetical protein Celaphus_00006404, partial [Cervus elaphus hippelaphus]
circRNA2638	-0.749054	down	0.61865	1	no	intergenic	NA
circRNA2962	-0.926395	down	0.618801	1	no	intergenic	NA
circRNA4012	-0.917396	down	0.618989	1	no	intergenic	NA
circRNA5292	-1.48794	down	0.620074	1	no	intergenic	NA
circRNA45	1.12302	up	0.620631	1	no	circRNA	TBC1 domain family member 20 isoform X2 [Odocoileus virginianus texanus]
circRNA3293	2.29334	up	0.620832	1	no	circRNA	KTN1 [Cervus elaphus hippelaphus]
[truncated: 7,447 more rows]
