# Supplementary material for: Whole-Transcriptome Sequencing of Antler Tissue Reveals That circRNA2829 Regulates Chondrocyte Proliferation and Differentiation via the miR-4286-R+1/FOXO4 Axis
Source: Int J Mol Sci. 2023 Apr 13;24(8):7204. doi: 10.3390/ijms24087204 (PMC10139046; doi:10.3390/ijms24087204)
Supplement: Supplementary file 1 [file ijms-24-07204-s001.zip › SupplementaryFile2.xlsx]

## Sheet: Sheet1
Supplementary File S2. Differentially expressed miRNA in CvsM
red is pvalue<0.001,orange is pvalue <0.01,blue is pvalue<0.05,green is pvalue <0.1.
Index	miR_name	up/down	fold_change(C(mean)/M(mean))	log2(fold_change)	pvalue(t_test)	Expression level
1	bta-miR-424-3p	up	inf	inf	0.000279073	middle
2	bta-miR-100	down	0.387603	-1.36735	0.000505545	high
3	bta-miR-23a	up	6.26918	2.64828	0.000690657	high
4	chi-let-7b-3p	up	13.5612	3.76141	0.000831198	middle
5	hsa-miR-30e-3p_1ss22CT	up	inf	inf	0.00109881	middle
6	bta-miR-486_R-1	down	0.15234	-2.71463	0.00128807	high
7	bta-miR-181d_R+1	up	inf	inf	0.00165489	low
8	bta-miR-7	down	0.027948	-5.16111	0.00168198	middle
9	bta-miR-149-5p_R-3	up	inf	inf	0.00178599	low
10	bta-miR-339b	up	42.9193	5.42356	0.00179078	middle
11	bta-miR-339b_R+2_1	up	15.3634	3.94143	0.00191895	middle
12	bta-miR-339b_R+2_2	up	15.3634	3.94143	0.00191895	middle
13	hsa-miR-4443_L+1	up	inf	inf	0.00200042	low
14	PC-3p-59655_18	down	-inf	-inf	0.00204357	middle
15	hsa-miR-493-5p	up	17.0058	4.08796	0.00216966	middle
16	pal-miR-339a-3p_2ss1AC10GA	up	inf	inf	0.00223064	low
17	bta-miR-3431	up	inf	inf	0.00223919	middle
18	hsa-miR-152-5p	up	inf	inf	0.00237546	low
19	bta-miR-15b	up	15.7747	3.97954	0.00237627	middle
20	bta-miR-181b	up	5.75499	2.52481	0.0024028	high
21	bta-miR-7857-5p	up	inf	inf	0.00243832	low
22	bta-mir-1246-p3_2ss14AT17AT	down	-inf	-inf	0.00272054	middle
23	hsa-miR-33b-3p_R-1	up	inf	inf	0.00273845	low
24	chi-miR-18a-3p	up	inf	inf	0.00290012	middle
25	bta-miR-425-5p_L+1R+2	up	inf	inf	0.00315401	middle
26	bta-miR-92a	up	1.49333	0.578536	0.00321926	high
27	bta-miR-122_R-1	down	0.0747186	-3.74239	0.00341428	high
28	bta-miR-505_R+2	up	inf	inf	0.00360005	middle
29	cfa-miR-1842_L+1	up	inf	inf	0.00389161	middle
30	cja-miR-9933_L-3	up	inf	inf	0.00396045	middle
31	bta-miR-760-3p_R+2	up	inf	inf	0.00441621	low
32	mdo-miR-21-5p_L+2R+1	up	inf	inf	0.00455427	low
33	oan-miR-1386	up	inf	inf	0.00484767	middle
34	mmu-mir-6236-p3_3	down	0.102059	-3.29252	0.00572958	high
35	mmu-mir-6236-p3_2	down	0.102059	-3.29252	0.00572958	high
36	mmu-mir-6236-p3_1	down	0.102059	-3.29252	0.00572958	high
37	bta-miR-425-3p	up	inf	inf	0.0067916	middle
38	cgr-miR-15b-5p_L+2	up	inf	inf	0.0067954	low
39	bta-miR-193a-5p	up	inf	inf	0.0068381	middle
40	bta-let-7b	up	2.31983	1.21402	0.00736678	high
41	hsa-miR-1307-5p_R+1	up	inf	inf	0.00763985	low
42	bta-miR-1839_R-2	up	inf	inf	0.00764082	low
43	hsa-miR-125b-1-3p_R-1	up	inf	inf	0.0076629	middle
44	bta-miR-424-5p	up	inf	inf	0.00772573	middle
45	hsa-miR-324-3p_L-3R+1	up	inf	inf	0.00789484	middle
46	bta-miR-374a	up	inf	inf	0.0083542	middle
47	bta-miR-381_1ss4AG	up	inf	inf	0.00841028	middle
48	bta-miR-6529a	up	7.5817	2.92252	0.00850186	middle
49	eca-mir-8969-p3_1ss5AT	down	0.00907828	-6.78337	0.00856578	middle
50	chi-miR-342-5p	up	inf	inf	0.00882959	low
51	bta-miR-20b_R+1	up	inf	inf	0.00905954	low
52	bta-miR-500_R+2	up	inf	inf	0.00932869	middle
53	hsa-miR-214-5p	up	inf	inf	0.00948713	middle
54	mdo-miR-181b-5p_R+3_2	up	inf	inf	0.00992047	middle
55	mdo-miR-181b-5p_R+3_1	up	inf	inf	0.00992047	middle
56	hsa-miR-92b-5p_R+1	up	inf	inf	0.0102525	low
57	bta-miR-3432a_R-2	up	inf	inf	0.0107717	low
58	bta-miR-27b	up	2.30524	1.20492	0.0108739	high
59	hsa-miR-181a-2-3p_1ss6TC	up	6.97194	2.80156	0.0108764	middle
60	bta-miR-503-3p	up	inf	inf	0.0113233	middle
61	efu-miR-9226_1ss22GA	up	inf	inf	0.0115169	middle
62	mmu-miR-92a-3p_R+1	up	inf	inf	0.0117062	middle
63	mdo-miR-22-3p	up	inf	inf	0.0119953	low
64	ssc-miR-339_R+1	up	inf	inf	0.0125393	middle
65	oan-miR-27b-3p_R+1	up	inf	inf	0.013024	low
66	bta-miR-181c	up	inf	inf	0.0135869	middle
67	chi-miR-1388-3p_1ss22AG	up	inf	inf	0.0140367	low
68	bta-miR-26a_L+2	up	inf	inf	0.0144011	middle
69	bta-miR-214	up	12.8472	3.68338	0.0150523	high
70	bta-miR-532	up	8.93041	3.15873	0.0154449	middle
71	bta-miR-452	up	inf	inf	0.0156204	middle
72	mmu-let-7j_1ss8TG	up	inf	inf	0.016107	low
73	bta-miR-93_R+1	up	4.8995	2.29264	0.0165746	middle
74	hsa-miR-181a-3p	up	inf	inf	0.0165799	middle
75	bta-miR-200c	down	0.0408958	-4.6119	0.0166603	middle
76	bta-miR-34c_R+1	down	0.0214726	-5.54136	0.0166741	middle
77	bta-miR-23b-3p_R+1	up	10.8673	3.44192	0.0169613	high
78	bta-miR-4286_R+1	up	inf	inf	0.0169671	middle
79	bta-miR-342	up	51.9847	5.70001	0.0170786	high
80	bta-miR-423-5p	up	4.08496	2.03032	0.0173227	high
81	hsa-miR-93-3p_R+1_1ss11TC	up	inf	inf	0.0180699	low
82	bta-miR-331-3p_R-1	up	inf	inf	0.0181903	middle
83	bta-miR-491_R+1	up	inf	inf	0.0182376	middle
84	bta-miR-18a_R+1	up	inf	inf	0.0182447	low
85	mmu-miR-19b-1-5p	up	inf	inf	0.0183168	low
86	ssc-let-7f-3p_R+1	up	inf	inf	0.0186639	low
87	PC-5p-62274_17	down	-inf	-inf	0.0187804	middle
88	ssc-miR-378_R+2	up	inf	inf	0.0188644	low
89	hsa-miR-340-3p_R+1	up	inf	inf	0.0188644	low
90	bta-miR-340	up	inf	inf	0.0188644	low
91	ssc-mir-1285-p3_1ss16CT	up	51.0054	5.67258	0.0189071	high
92	PC-3p-74083_12	down	-inf	-inf	0.0197084	middle
93	chi-miR-20a-3p_R+2_1ss9AG	up	inf	inf	0.01985	low
94	hsa-miR-574-3p_R-3	up	inf	inf	0.0201152	low
95	hsa-miR-191-3p_L-1_1ss19CT	up	inf	inf	0.0201421	middle
96	bta-miR-27a-3p_R+1	up	2.61042	1.38428	0.0203382	high
97	PC-3p-3494_409	up	inf	inf	0.0205918	middle
98	bta-miR-3432a_1ss21TC	up	inf	inf	0.0209477	middle
99	bta-miR-339b_R+3	up	inf	inf	0.0213892	middle
100	ssc-miR-339-5p_R+1_1ss22CA	up	inf	inf	0.0213892	middle
101	bta-miR-874	up	inf	inf	0.0216325	low
102	bta-miR-361	up	6.10829	2.61077	0.0218642	middle
103	mmu-let-7c-5p_R+2_1ss17AG	up	3.90501	1.96533	0.0220554	middle
104	chi-miR-3432-3p	up	inf	inf	0.0221328	low
105	hsa-miR-378a-5p	up	inf	inf	0.0221589	middle
106	bta-miR-99a-3p_R+4	up	inf	inf	0.0223841	low
107	bta-miR-299	up	inf	inf	0.0226732	middle
108	hsa-miR-500a-3p_R+1	up	14.2203	3.82988	0.0230257	middle
109	bta-miR-362-5p	up	5.84344	2.54682	0.0230535	middle
110	bta-miR-2285l_R-1	up	inf	inf	0.0232241	middle
111	mmu-miR-92a-3p_R+2	up	inf	inf	0.024397	middle
112	PC-3p-7311_217	up	inf	inf	0.0244553	middle
113	bta-miR-409a	up	inf	inf	0.024723	middle
114	bta-miR-24-3p_R+1	up	3.23235	1.69258	0.024875	middle
115	PC-3p-72665_13	down	-inf	-inf	0.0249574	middle
116	hsa-miR-574-5p	up	4.57396	2.19344	0.0253247	middle
117	bta-let-7d	up	7.09971	2.82776	0.0253289	middle
118	ssc-miR-7134-3p_1ss11TC	up	inf	inf	0.0254938	middle
119	bta-miR-450a	up	inf	inf	0.0255189	middle
120	cpo-miR-450a-5p	up	inf	inf	0.0255189	middle
121	ocu-miR-450a-5p	up	inf	inf	0.0255189	middle
122	bta-mir-3431-p3	up	inf	inf	0.025664	middle
123	bta-miR-1296	up	inf	inf	0.0278136	middle
124	oan-miR-27b-3p_R+2	up	inf	inf	0.0279705	low
125	bta-miR-2387_R+1	up	inf	inf	0.0285565	middle
126	ocu-miR-2387-5p	up	inf	inf	0.0285565	middle
127	bta-miR-224_R-1	up	4.12378	2.04397	0.0287387	middle
128	pal-miR-9226-5p_1ss4AG	up	inf	inf	0.0288383	middle
129	bta-miR-375_L-1	down	0.0256889	-5.28271	0.0292673	high
130	bta-miR-148a	up	2.73336	1.45068	0.0294948	high
131	cja-miR-9933_L-4	up	inf	inf	0.0296456	low
132	bta-miR-497_R-1	up	7.7986	2.96322	0.0296827	middle
133	bta-miR-374b	up	inf	inf	0.029695	middle
134	cpo-miR-99b-3p_R+1	up	inf	inf	0.0298156	middle
135	PC-3p-55382_21	down	-inf	-inf	0.0301	middle
136	bta-miR-378b_R+2_1ss4TG	up	inf	inf	0.0303845	low
137	hsa-miR-335-3p	up	inf	inf	0.0305383	low
138	bta-miR-28_R-1	up	inf	inf	0.0306071	middle
139	bta-miR-378c_R-1	up	inf	inf	0.0310221	middle
140	hsa-miR-7977_1ss6AG	up	inf	inf	0.0311441	middle
141	pal-miR-9993b-3p	up	18.6358	4.22001	0.0313807	middle
142	bta-miR-769	up	inf	inf	0.0315311	middle
143	hsa-miR-148a-5p	up	inf	inf	0.0315803	middle
144	eca-mir-8969-p3_1ss4GT	down	0.00326338	-8.25942	0.0321113	middle
145	bta-miR-155	up	11.3126	3.49985	0.032675	middle
146	bta-miR-19a	up	inf	inf	0.0330786	low
147	mdo-miR-181a-5p_R+3_2	up	inf	inf	0.0331044	middle
148	mdo-miR-181a-5p_R+3_1	up	inf	inf	0.0331044	middle
149	mdo-mir-181b-1-p3_1ss16CT	down	-inf	-inf	0.0331828	middle
150	bta-mir-1246-p3_1ss3CT	down	0.0300536	-5.05632	0.0336392	middle
151	ssc-let-7i-3p	up	inf	inf	0.0338532	middle
152	hsa-miR-361-3p_L-1R+2	up	inf	inf	0.0346145	middle
153	hsa-let-7d-3p	up	inf	inf	0.0348045	middle
154	bta-miR-324	up	inf	inf	0.0351094	middle
155	PC-3p-20191_84	up	inf	inf	0.035201	low
156	hsa-mir-5100-p3_1ss17TC	up	inf	inf	0.0352052	middle
157	bta-miR-2285cl_R+2	up	inf	inf	0.0358898	low
158	PC-5p-59963_18	down	-inf	-inf	0.0359612	middle
159	hsa-miR-412-5p	up	inf	inf	0.0370149	low
160	hsa-miR-30a-3p	up	inf	inf	0.0370789	low
161	pal-miR-9993a-3p	up	inf	inf	0.0374962	middle
162	bta-miR-191	up	2.48822	1.31511	0.0379701	high
163	PC-3p-75415_12	down	-inf	-inf	0.0380524	middle
164	hsa-let-7g-3p_R+1	up	inf	inf	0.0387571	low
165	bta-miR-1260b	up	inf	inf	0.0392798	middle
166	hsa-miR-1260a_L+1_1ss10TG	up	inf	inf	0.0395185	low
167	mdo-let-7f-2-3p_1ss22CT	up	inf	inf	0.0395982	low
168	cgr-miR-1260_1ss18AT	up	inf	inf	0.0403601	low
169	bta-miR-146b	up	inf	inf	0.0404376	low
170	bta-miR-365-3p	up	2.97161	1.57124	0.0405425	middle
171	hsa-miR-4508_L+2R-1	up	inf	inf	0.0409142	middle
172	bta-miR-654_R-1_1ss21TC	up	inf	inf	0.0410061	middle
173	bta-miR-330	up	inf	inf	0.0414911	middle
174	hsa-miR-330-3p	up	inf	inf	0.0414911	middle
175	bta-miR-449a	up	inf	inf	0.0420211	low
176	hsa-miR-195-3p_R+1	up	inf	inf	0.0421457	middle
177	bta-miR-127	up	3.47435	1.79674	0.042191	high
178	eca-mir-8986b-p5	up	inf	inf	0.0422266	low
179	bta-mir-1246-p5_1ss17AG	down	0.00289567	-8.43189	0.0428512	high
180	bta-mir-1246-p3_1ss17AG	down	0.00289567	-8.43189	0.0428512	high
181	hsa-miR-103a-2-5p	up	inf	inf	0.0432987	low
182	hsa-miR-1260a_R+1_1ss9TG_2	up	inf	inf	0.0433533	middle
183	hsa-miR-1260b_1ss9AG	up	inf	inf	0.0433533	middle
184	hsa-miR-1260a_R+1_1ss9TG_1	up	inf	inf	0.0433533	middle
185	bta-miR-26a_L+1	up	inf	inf	0.0439549	low
186	PC-5p-14216_119	up	inf	inf	0.0442559	middle
187	bta-miR-3957_R+4	up	inf	inf	0.0446937	low
188	bta-miR-484	up	13.6047	3.76603	0.0451372	middle
189	cgr-miR-1260_1ss3CA	up	inf	inf	0.0461356	low
190	bta-let-7a-3p_R+1	up	inf	inf	0.0470772	middle
191	bta-miR-542-5p_R+1	up	inf	inf	0.0473719	middle
192	hsa-miR-299-3p_1ss10TC	up	inf	inf	0.0476794	low
193	bta-miR-455-5p_R+1	down	0.369102	-1.43791	0.0483131	middle
194	bta-miR-2284y	up	inf	inf	0.048691	low
195	hsa-miR-148b-5p_L+1	up	inf	inf	0.0497544	low
196	pal-miR-9993a-3p_1ss11GA	up	16.4488	4.03991	0.0498697	middle
197	pal-miR-9995-3p	up	16.4488	4.03991	0.0498697	middle
Following miRNAs do not show significant difference (p-value<0.05).
198	bta-miR-1260b_1ss9AG	up	10.6754	3.41622	0.050122	high
199	hsa-miR-1260a_1ss9TG	up	10.6754	3.41622	0.050122	high
200	mdo-miR-29b-2-5p_L-1	up	inf	inf	0.0505787	low
201	bta-mir-1246-p5_1ss18AG	down	0.0277817	-5.16972	0.0506506	high
202	hsa-miR-574-3p_R-2	up	inf	inf	0.050799	middle
203	bta-mir-4444-p3	down	-inf	-inf	0.0510774	middle
204	bta-miR-154b	up	inf	inf	0.0511884	middle
205	ssc-miR-7134-5p_R+1_1ss9GA	up	inf	inf	0.0520178	middle
206	hsa-miR-1306-3p_L+3R+1	up	inf	inf	0.0528054	middle
207	eca-mir-1543-p3_1ss19AG	up	inf	inf	0.0532811	low
208	bta-miR-652_R+1	up	inf	inf	0.0537096	middle
209	PC-3p-47247_28	down	-inf	-inf	0.054943	middle
210	PC-3p-11929_140	up	inf	inf	0.0551024	low
211	bta-miR-331-5p_R+4	up	inf	inf	0.0556893	middle
212	bta-let-7b_R-3	up	inf	inf	0.0561236	low
213	bta-miR-378	up	8.29531	3.0523	0.0564549	high
214	bta-miR-502b_L-1R+4_1ss4CG	up	inf	inf	0.0575706	low
215	hsa-miR-450a-1-3p_2ss8AG20TC	up	inf	inf	0.0577833	low
216	cpo-miR-450a-3p	up	inf	inf	0.0577833	low
217	PC-3p-2318_604	down	0.000224232	-12.1227	0.0578043	high
218	pal-miR-9226-5p_L-4_1ss15GA	up	inf	inf	0.0580247	low
219	bta-miR-106b	up	inf	inf	0.0582551	middle
220	bta-miR-2285bc_R-1	up	inf	inf	0.0585628	middle
221	bta-miR-107_R-1	up	2.87147	1.52179	0.0586536	middle
222	hsa-miR-27b-5p_R+1	up	inf	inf	0.0586888	middle
223	bta-miR-339b_R-1	up	inf	inf	0.059384	low
224	bta-miR-34a_R+1	up	inf	inf	0.0595148	middle
225	hsa-miR-140-5p	up	17.5978	4.13732	0.059807	middle
226	bta-miR-374c_R+2_1ss4CT	up	inf	inf	0.0598467	low
227	PC-3p-60625_18	down	-inf	-inf	0.0599501	middle
228	eca-mir-9182-p3_1ss4GA	down	-inf	-inf	0.0600927	high
229	bta-miR-199a-3p_R-1	up	2.19027	1.13111	0.0601647	high
230	bta-miR-421	up	inf	inf	0.0605771	middle
231	bta-miR-345-3p_R+1	up	inf	inf	0.0613981	low
232	bta-miR-17-5p_R-1	up	8.1695	3.03025	0.061589	middle
233	bta-miR-106a_R+1_1ss1AC	up	8.1695	3.03025	0.061589	middle
234	bta-miR-2285bm_1ss14GA	up	inf	inf	0.0618925	middle
235	bta-miR-103	up	1.68175	0.749967	0.0619333	middle
236	bta-miR-326_R+1	up	inf	inf	0.062456	middle
237	hsa-miR-378c_R-4	up	inf	inf	0.0625125	low
238	PC-5p-49388_26	down	-inf	-inf	0.0630348	middle
239	oan-miR-1417-3p_R-3_1ss11TC	up	inf	inf	0.0631485	low
240	mmu-mir-6240-p3_2	up	inf	inf	0.0632346	low
241	mmu-mir-6240-p3_1	up	inf	inf	0.0632346	low
242	bta-miR-139	up	7.99478	2.99906	0.0634411	middle
243	bta-miR-151-5p	up	11.9944	3.58428	0.0636995	high
244	bta-miR-296-3p_L-1R+1	up	4.14282	2.05061	0.0637325	middle
245	bta-let-7b_R-1_1ss21TA	up	inf	inf	0.0640626	low
246	hsa-miR-151b_R+4	up	inf	inf	0.0645626	low
247	bta-miR-149-5p	up	14.6536	3.87318	0.064731	high
248	oar-miR-1185-3p	up	inf	inf	0.0648059	low
249	hsa-miR-532-3p	up	inf	inf	0.0654888	middle
250	PC-3p-51671_24	down	-inf	-inf	0.0660937	middle
251	hsa-miR-320b	up	inf	inf	0.0662861	low
252	efu-miR-9226_L-1_2ss4AG22GA	up	4.59864	2.20121	0.0670677	middle
253	bta-miR-487b	up	inf	inf	0.0671115	middle
254	mmu-mir-1983-p5_1ss1GA	up	inf	inf	0.0672434	low
255	hsa-miR-24-2-5p_L+1R+1	up	inf	inf	0.0691148	middle
256	hsa-miR-4492_L+1	up	inf	inf	0.0691903	low
257	bta-miR-2419-5p	up	inf	inf	0.0694176	middle
258	bta-miR-411c-5p	up	inf	inf	0.0696413	low
259	pal-miR-9226-5p_L-4	up	inf	inf	0.0697217	middle
260	mmu-miR-1983	up	inf	inf	0.0710819	middle
261	hsa-miR-4454_L-1_1ss2GA	up	inf	inf	0.0717537	low
262	hsa-miR-574-3p_R-1_1ss21CT	up	inf	inf	0.0719218	middle
263	bta-miR-30c_R+1	up	2.60613	1.38191	0.0722869	high
264	bta-miR-30f_1ss9CT	up	2.60613	1.38191	0.0722869	high
265	bta-miR-4286_R+2_1	up	inf	inf	0.0726155	low
266	bta-miR-4286_R+2_2	up	inf	inf	0.0726155	low
267	bta-miR-195	up	inf	inf	0.0736053	middle
268	bta-let-7c	down	0.702981	-0.508442	0.0739009	middle
269	bta-miR-17-3p_R+2	up	inf	inf	0.0742489	middle
270	hsa-miR-25-5p_R+2	up	inf	inf	0.0744715	middle
271	bta-miR-145	up	6.67065	2.73783	0.0745173	high
272	bta-miR-345-5p	up	inf	inf	0.0748926	middle
273	oar-miR-3957-3p_1ss10AG	up	inf	inf	0.0755682	middle
274	PC-3p-46277_29	down	-inf	-inf	0.0756945	middle
275	hsa-miR-28-3p_1ss11TA	down	0.145397	-2.78193	0.0759033	high
276	mmu-miR-3968_L-2_1ss14AT	up	inf	inf	0.0764104	low
277	bta-miR-380-3p	up	inf	inf	0.0769258	middle
278	cja-miR-1323	down	0.0158885	-5.97587	0.0773774	middle
279	bta-miR-1246_L-1R+4	down	0.00524007	-7.5762	0.0782318	high
280	bta-miR-193b_R-2	up	9.10622	3.18685	0.0783779	high
281	hsa-miR-654-5p_R+1_1ss9CT	up	inf	inf	0.0784094	middle
282	bta-miR-29a_L-1	up	1.93817	0.954692	0.0786607	middle
283	bta-mir-2904-2-p3_3	up	20.5225	4.35913	0.0788754	middle
284	bta-mir-2904-2-p3_1	up	20.5225	4.35913	0.0788754	middle
285	hsa-miR-125a-3p_R-1	up	inf	inf	0.0789069	middle
286	pal-miR-9993a-3p_L+1_2	up	inf	inf	0.0798015	low
287	pal-miR-9993a-3p_L+1_1	up	inf	inf	0.0798015	low
288	bta-miR-138	up	inf	inf	0.0800052	low
289	hsa-miR-1260b_R+1_1ss9AG	up	inf	inf	0.0803053	middle
290	bta-miR-2478_L-2	up	8.03104	3.00559	0.0806776	high
291	hsa-miR-221-5p_R+4	up	inf	inf	0.0814244	low
292	bta-miR-2887_R+2	up	7.82322	2.96776	0.0819727	middle
293	hsa-miR-409-3p	up	3.62359	1.85742	0.08217	middle
294	ggo-miR-574_1ss22AT	up	inf	inf	0.0827715	middle
295	hsa-miR-574-3p_1ss22AT	up	inf	inf	0.0827715	middle
296	bta-miR-410	up	inf	inf	0.0833829	middle
297	hsa-miR-4454_L-2	up	inf	inf	0.0844182	middle
298	PC-3p-57884_20	down	-inf	-inf	0.0850626	middle
299	bta-miR-1434-3p_L+3	up	inf	inf	0.0851479	low
300	hsa-miR-365b-5p_R+1	up	inf	inf	0.0851721	low
301	efu-miR-9298_L+2R-4	up	inf	inf	0.0856454	middle
302	bta-miR-671_R+1	up	inf	inf	0.0858538	low
303	cgr-miR-1260_R+2	up	inf	inf	0.0860755	middle
304	bta-let-7b_R-2_1ss20GA	up	inf	inf	0.0861076	low
305	bta-miR-483_R+2	up	inf	inf	0.0870945	middle
306	bta-miR-130b	up	inf	inf	0.0871545	middle
307	bta-miR-744_R-1	down	0.406341	-1.29924	0.0876936	middle
308	hsa-miR-138-1-3p_R-1_1ss21CT	up	inf	inf	0.088034	low
309	ssc-mir-1285-p5	up	6.85238	2.77661	0.0883227	middle
310	efu-mir-9277-p5_1ss10CT	up	inf	inf	0.0887985	low
311	hsa-miR-26b-3p_R+1	up	inf	inf	0.0893225	low
312	cfa-miR-340	up	inf	inf	0.0898079	middle
313	hsa-miR-340-5p	up	inf	inf	0.0898079	middle
314	bta-miR-450b_R-1	up	inf	inf	0.0898129	low
315	hsa-miR-4508_L+1	up	inf	inf	0.0910851	low
316	bta-miR-10172-3p_1ss9CT	up	inf	inf	0.0915854	low
317	bta-miR-503-5p_R+3	up	inf	inf	0.0921831	middle
318	PC-5p-18609_91	down	-inf	-inf	0.0926713	high
319	hsa-miR-143-5p_R-1	up	inf	inf	0.092686	low
320	hsa-miR-127-5p_R+1	up	inf	inf	0.0932323	low
321	hsa-miR-4286_R+3	up	inf	inf	0.0957268	low
322	PC-3p-36953_40	down	-inf	-inf	0.0961282	middle
323	hsa-miR-4448_R-1_1ss6CG	up	inf	inf	0.0962405	low
324	PC-5p-26031_63	down	-inf	-inf	0.0964866	middle
325	bta-miR-431_R-3	up	inf	inf	0.0966207	middle
326	bta-miR-2284x_R+1	up	3.7679	1.91376	0.0978512	middle
327	bta-miR-6123	up	inf	inf	0.0979401	middle
328	bta-miR-7857-3p	up	inf	inf	0.0991299	middle
329	bta-miR-7859	up	inf	inf	0.100336	low
330	mmu-mir-6240-p5_1ss18GT_2	up	5.72538	2.51737	0.100366	middle
331	mmu-mir-6240-p5_1ss18GT_1	up	5.72538	2.51737	0.100366	middle
332	bta-miR-23b-5p_L+1	up	inf	inf	0.100404	middle
333	hsa-miR-10400-5p_R-3_1ss12GA	up	inf	inf	0.102244	low
334	PC-3p-15561_109	up	inf	inf	0.102362	middle
335	bta-let-7e_R+1	up	4.33595	2.11635	0.102822	high
336	hsa-miR-10395-3p_L-3	up	inf	inf	0.103351	low
337	hsa-miR-671-3p	up	inf	inf	0.103714	middle
338	cgr-miR-1260_L+1	up	inf	inf	0.105114	middle
339	bta-miR-27a-5p	up	inf	inf	0.105201	middle
340	bta-miR-186_R+1	up	3.57013	1.83598	0.106916	middle
341	mmu-miR-3535_1ss20CT	up	inf	inf	0.1072	low
342	hsa-miR-4454_1ss2GA	up	inf	inf	0.108193	low
343	bta-miR-450b_R+1	up	inf	inf	0.108601	low
344	bta-miR-199c_L-1R+2	up	inf	inf	0.109201	low
345	bta-miR-2440_L+1R+2_1ss3GT	down	0.0728111	-3.7797	0.109336	high
346	bta-miR-455-3p_1ss22TC	up	219.179	7.77597	0.110117	high
347	bta-miR-151-3p	up	2.38508	1.25404	0.111139	middle
348	bta-mir-1246-p5_1ss18AT	up	inf	inf	0.111481	low
349	bta-mir-1246-p3_1ss18AT	up	inf	inf	0.111481	low
350	hsa-miR-139-3p	up	inf	inf	0.111997	low
351	hsa-miR-1260a_R+3_1ss9TG	up	inf	inf	0.112633	low
352	hsa-miR-4508_L+1R+1	up	inf	inf	0.112687	low
353	cgr-miR-1260_L+2	up	inf	inf	0.112894	middle
354	hsa-miR-1260a_L+2_1ss11TG	up	inf	inf	0.112894	middle
355	PC-3p-17788_96	up	inf	inf	0.113454	middle
356	eca-mir-9182-p5_1	up	inf	inf	0.114319	low
357	eca-mir-9182-p5_2	up	inf	inf	0.114319	low
358	mmu-mir-6240-p5_3	up	inf	inf	0.115213	low
359	mmu-mir-6240-p5_1	up	inf	inf	0.115213	low
360	mmu-mir-6240-p5_2	up	inf	inf	0.115213	low
361	mmu-mir-6240-p5_5	up	inf	inf	0.115213	low
362	mmu-mir-6240-p5_4	up	inf	inf	0.115213	low
363	PC-3p-29122_55	up	inf	inf	0.115226	middle
364	bta-miR-2387_R-1	up	inf	inf	0.115318	middle
365	hsa-miR-574-3p	up	35.7095	5.15824	0.115396	high
366	mmu-mir-5125-p3_1ss18TC	down	-inf	-inf	0.115943	middle
367	bta-miR-423-3p_L-1	up	9.8856	3.30533	0.116484	high
368	bta-miR-370	up	inf	inf	0.118877	low
369	PC-3p-1429_1016	up	4.874	2.28511	0.119435	middle
370	bta-miR-1343-3p_R+2	up	inf	inf	0.119881	middle
371	pal-miR-9993a-3p_L+2_1	up	inf	inf	0.120551	middle
372	pal-miR-9993a-3p_L+2_2	up	inf	inf	0.120551	middle
373	PC-5p-61040_18	up	inf	inf	0.120662	low
374	bta-mir-2887-1-p5	up	12.0097	3.58613	0.12068	middle
375	bta-miR-11980_R-1_1ss4CG	up	inf	inf	0.120764	middle
376	hsa-miR-106b-3p	down	0.552114	-0.856961	0.123159	middle
377	bta-miR-655	up	inf	inf	0.12321	middle
378	pal-miR-9226-5p_L-1_1ss15GA	up	inf	inf	0.123299	low
379	mmu-miR-6239_R-2_1ss6TG	up	inf	inf	0.123647	low
380	bta-miR-210_L-1	up	inf	inf	0.124092	middle
381	bta-mir-2887-1-p3	up	inf	inf	0.124356	middle
382	bta-miR-494_R+1	up	inf	inf	0.124649	middle
383	bta-miR-1291_R+1	up	inf	inf	0.125085	low
384	pal-miR-9995-3p_1ss1AG	up	inf	inf	0.125325	middle
385	bta-miR-369-3p	up	inf	inf	0.125327	low
386	PC-3p-14143_119	up	inf	inf	0.126027	middle
387	PC-5p-4205_347	up	inf	inf	0.128368	middle
388	efu-miR-9277_L-4R+1	up	inf	inf	0.128536	low
389	hsa-mir-574-p5	up	5.84336	2.5468	0.128716	middle
390	PC-3p-57638_20	down	-inf	-inf	0.129631	middle
391	bta-miR-320a	up	1.78997	0.839938	0.129723	high
392	PC-3p-9664_169	down	-inf	-inf	0.130044	high
393	ggo-miR-329b_R+2	up	inf	inf	0.130448	low
394	hsa-miR-329-3p	up	inf	inf	0.130448	low
395	bta-mir-1246-p3_1ss2CT	down	0.0294647	-5.08487	0.130893	middle
396	hsa-miR-485-3p	up	inf	inf	0.131805	middle
397	bta-miR-664b_R+1	up	inf	inf	0.13254	middle
398	bta-miR-1306	up	inf	inf	0.13486	middle
399	bta-miR-328	up	inf	inf	0.136444	middle
400	cja-mir-421-p5	up	inf	inf	0.136995	low
401	bta-miR-1249	up	inf	inf	0.138206	middle
402	PC-5p-39550_37	up	inf	inf	0.138949	low
403	bta-miR-2484_R+1_1ss6AG	down	0.0986033	-3.34222	0.139182	middle
404	chi-let-7e-3p	up	inf	inf	0.141488	middle
405	mmu-miR-3968_1ss14AT	up	inf	inf	0.145499	middle
406	bta-miR-411a	up	inf	inf	0.14551	middle
407	bta-miR-101_R+1	down	0.0159683	-5.96864	0.146711	high
408	hsa-miR-7161-3p_L-3R-5	down	-inf	-inf	0.147774	middle
409	pal-miR-9995-3p_L+1_2	up	inf	inf	0.147889	middle
410	pal-miR-9995-3p_L+1_3	up	inf	inf	0.147889	middle
411	pal-miR-9995-3p_L+1_1	up	inf	inf	0.147889	middle
412	bta-miR-758_R-1	up	inf	inf	0.147991	middle
413	hsa-miR-431-3p_R-1	up	inf	inf	0.148807	low
414	mmu-miR-185-3p_2ss18TC21TC	up	inf	inf	0.149277	low
415	bta-miR-369-5p_L+2R-1	up	inf	inf	0.150339	low
416	PC-5p-59157_19	down	-inf	-inf	0.152945	middle
417	bta-miR-129_R-1	up	inf	inf	0.156392	middle
418	bta-let-7i	up	1.8578	0.893597	0.156537	high
419	ssc-miR-145-3p	up	inf	inf	0.157095	low
420	bta-miR-125a_R+1	up	2.66287	1.41298	0.158857	high
421	PC-3p-23858_70	up	inf	inf	0.160456	low
422	mmu-mir-6236-p5_1	up	inf	inf	0.160511	low
423	mmu-mir-6236-p5_2	up	inf	inf	0.160511	low
424	bta-miR-152_R-1	up	2.16398	1.11369	0.162473	middle
425	ppy-mir-1268-p5_1ss8GA	up	inf	inf	0.164279	low
426	oar-miR-382-3p_R+1	up	inf	inf	0.164341	low
427	PC-5p-12360_136	up	inf	inf	0.16708	middle
428	cgr-mir-1285-p5_1ss6TC_2	up	inf	inf	0.167494	low
429	cgr-mir-1285-p5_1ss6TC_1	up	inf	inf	0.167494	low
430	ppy-mir-1268-p5_1ss9GA	up	inf	inf	0.168084	low
431	bta-miR-11987_L-1R-1_1ss8TA	up	inf	inf	0.168238	low
432	bta-miR-194	down	0.171254	-2.54579	0.168795	middle
433	PC-3p-21750_77	down	-inf	-inf	0.168873	high
434	bta-miR-365-5p	up	inf	inf	0.168936	middle
435	hsa-miR-4454_L+1_1ss3GA	up	inf	inf	0.170754	middle
436	PC-5p-24130_69	down	-inf	-inf	0.170931	middle
437	mmu-mir-6240-p3_1ss4AG	up	inf	inf	0.171532	middle
438	bta-miR-197	up	5.80789	2.53802	0.17163	high
439	bta-miR-543	up	inf	inf	0.176199	middle
440	bta-miR-376e	up	inf	inf	0.176487	low
441	bta-let-7a-5p_L+1	down	0.0370581	-4.75407	0.177557	middle
442	bta-miR-11987_L-1_1ss8TA	up	inf	inf	0.177594	middle
443	PC-5p-12820_131	up	inf	inf	0.177734	middle
444	PC-3p-24757_67	down	-inf	-inf	0.177917	high
445	bta-miR-143_R-1	down	0.264176	-1.92043	0.180962	high
446	PC-5p-23101_72	up	inf	inf	0.182321	low
447	PC-5p-25219_65	up	inf	inf	0.182439	middle
448	bta-miR-30b-3p_R+1_1ss8GA	up	inf	inf	0.183641	low
449	PC-3p-75412_12	down	-inf	-inf	0.183694	middle
450	mmu-miR-452-3p_1ss20GA	up	inf	inf	0.183734	low
451	hsa-miR-574-3p_L+1	up	inf	inf	0.18376	low
452	ssc-miR-664-5p_R-1_1ss14GA	up	inf	inf	0.183975	low
453	ssc-miR-194a-3p_R+1	up	inf	inf	0.184209	low
454	PC-3p-69492_14	down	-inf	-inf	0.184448	middle
455	PC-5p-10027_164	up	inf	inf	0.18463	middle
456	bta-miR-188	up	inf	inf	0.185245	low
457	bta-miR-2331-3p_R+2	up	inf	inf	0.185253	low
458	mmu-mir-6236-p3_1ss9AG_1	up	inf	inf	0.185494	low
459	mmu-mir-6236-p3_1ss9AG_2	up	inf	inf	0.185494	low
460	PC-3p-47388_28	down	0.00259461	-8.59026	0.185786	middle
461	PC-3p-24719_67	up	inf	inf	0.185992	low
462	bta-miR-363_L+1	up	inf	inf	0.186105	middle
463	pal-miR-9226-5p_L-3_1ss15GA	up	inf	inf	0.1862	low
464	cgr-miR-532-5p_R+2_2	up	inf	inf	0.186358	low
465	cgr-miR-532-5p_R+2_1	up	inf	inf	0.186358	low
466	PC-3p-61286_18	up	inf	inf	0.186573	low
467	pal-miR-9993a-3p_L+1_1ss12GA	up	inf	inf	0.187877	middle
468	bta-miR-885	up	inf	inf	0.187889	low
469	hsa-miR-33a-3p_R-1	up	inf	inf	0.188454	low
470	bta-miR-660_R+1	up	1.99343	0.99525	0.188553	middle
471	bta-miR-196a	down	-inf	-inf	0.188603	middle
472	bta-mir-1246-p3_2ss17AG20TG	down	-inf	-inf	0.189786	middle
473	hsa-miR-454-5p_1ss9AG	up	inf	inf	0.190806	low
474	bta-miR-183_R-1	down	0.00664884	-7.23268	0.190891	middle
475	hsa-miR-210-5p_R+1_1ss5CA	up	inf	inf	0.190903	middle
476	PC-3p-80710_10	down	-inf	-inf	0.191041	middle
477	pal-miR-9993b-3p_L+1_2	up	inf	inf	0.193359	middle
478	pal-miR-9993b-3p_L+1_3	up	inf	inf	0.193359	middle
479	pal-miR-9993b-3p_L+1_1	up	inf	inf	0.193359	middle
480	mmu-let-7a-2-3p_R+1	up	inf	inf	0.193499	low
481	hsa-miR-212-3p_R+1	up	inf	inf	0.194219	low
482	PC-3p-11769_142	down	0.00826759	-6.91832	0.194553	high
483	mmu-miR-146a-5p_R+1	up	inf	inf	0.194772	low
484	bta-miR-2332_L-6	up	inf	inf	0.195922	middle
485	mmu-miR-5126_R-4_1ss18CT	up	inf	inf	0.196828	low
486	bta-miR-21-3p_L+1R-2	up	inf	inf	0.197377	low
487	mmu-miR-92a-3p_R+1_1ss21GA	up	inf	inf	0.197509	low
488	PC-5p-101316_7	down	-inf	-inf	0.198141	middle
489	PC-5p-91518_8	down	-inf	-inf	0.198698	middle
490	bta-mir-134-p3_1ss17AG	up	inf	inf	0.199286	low
491	cgr-miR-30c-2_L+2R+1	up	inf	inf	0.199286	low
492	dno-miR-134-5p_R+1_1ss22CA	up	inf	inf	0.199286	low
493	bta-miR-149-3p	up	inf	inf	0.199286	low
494	PC-3p-81596_10	down	-inf	-inf	0.200032	middle
495	hsa-miR-379-3p_R-1	up	inf	inf	0.200346	middle
496	hsa-miR-9-5p	up	inf	inf	0.200351	low
497	bta-miR-9-5p_R+1	up	inf	inf	0.200351	low
498	pal-miR-9226-5p_L-4_1ss12TC	up	inf	inf	0.200427	low
499	PC-3p-39836_36	down	-inf	-inf	0.20074	high
500	hsa-miR-3195_L+4R-1	up	inf	inf	0.201211	low
501	PC-5p-73527_12	down	-inf	-inf	0.202545	middle
502	PC-5p-69037_14	down	-inf	-inf	0.202682	middle
503	PC-3p-89957_8	down	-inf	-inf	0.202682	middle
504	mmu-miR-6238_L-2R-2_1ss12TC	up	inf	inf	0.20434	low
505	bta-mir-664a-p3_1ss14CA	up	inf	inf	0.20483	low
506	PC-3p-61870_17	down	-inf	-inf	0.206454	middle
507	bta-mir-4444-p5	down	-inf	-inf	0.206895	middle
508	chi-miR-128-5p	up	inf	inf	0.206922	low
509	bta-miR-433	up	2.79547	1.48309	0.207048	middle
510	bta-miR-11988_1ss8CT	down	-inf	-inf	0.207098	middle
511	PC-5p-114327_6	down	-inf	-inf	0.207098	middle
512	PC-3p-61295_18	down	-inf	-inf	0.207308	middle
513	PC-3p-60800_18	down	-inf	-inf	0.207308	middle
514	bta-miR-3956_L+2R-2	up	inf	inf	0.207795	low
515	hsa-mir-5100-p5_1ss18TC	up	inf	inf	0.207807	low
516	cfa-miR-346	up	inf	inf	0.20798	middle
517	PC-5p-90737_8	down	-inf	-inf	0.208886	middle
518	PC-3p-96218_7	down	-inf	-inf	0.209575	middle
519	PC-3p-63925_16	up	inf	inf	0.209976	low
520	PC-5p-85907_9	down	-inf	-inf	0.210076	middle
521	bta-miR-411c-3p	up	inf	inf	0.210477	low
522	bta-miR-22-3p_R+1	down	0.0943736	-3.40547	0.211675	high
523	oan-miR-458-3p	down	-inf	-inf	0.211759	middle
524	PC-3p-110811_6	down	-inf	-inf	0.211759	middle
525	PC-3p-97814_7	down	-inf	-inf	0.21439	middle
526	PC-3p-97592_7	down	-inf	-inf	0.21439	middle
527	hsa-miR-15b-3p_R-1	up	inf	inf	0.219059	low
528	bta-miR-2411-3p_L-1_1ss15CT	up	inf	inf	0.219252	low
529	PC-5p-33298_46	down	-inf	-inf	0.220174	middle
530	bta-miR-126-5p	down	0.26934	-1.8925	0.220185	middle
531	cgr-miR-199b_2ss10TC22TC	up	inf	inf	0.220194	low
532	sha-mir-199a-p5	up	inf	inf	0.220194	low
533	hsa-miR-505-5p_R+1	up	inf	inf	0.22159	low
534	hsa-miR-204-3p	up	inf	inf	0.221755	low
535	ggo-miR-517c_R+1	down	0.0168655	-5.88978	0.223442	middle
536	PC-5p-44609_31	down	-inf	-inf	0.223774	middle
537	PC-5p-82313_10	down	-inf	-inf	0.224474	middle
538	PC-5p-138381_5	down	-inf	-inf	0.224474	middle
539	PC-5p-129988_5	down	-inf	-inf	0.224474	middle
540	cgr-mir-1285-p5_1ss7TC	up	inf	inf	0.225056	low
541	bta-miR-3957_R+5	up	inf	inf	0.225301	low
542	bta-miR-30e-5p	down	0.453898	-1.13956	0.229241	middle
543	bta-miR-493	down	0.135482	-2.88383	0.229542	middle
544	PC-3p-104949_6	down	-inf	-inf	0.229906	middle
545	PC-5p-134393_5	down	-inf	-inf	0.229921	middle
546	PC-5p-141760_5	down	-inf	-inf	0.229921	middle
547	PC-3p-135339_5	down	-inf	-inf	0.229921	middle
548	bta-miR-2366_R+1	up	inf	inf	0.230406	low
549	PC-5p-65357_15	down	-inf	-inf	0.232245	middle
550	PC-5p-20773_81	up	inf	inf	0.232319	middle
551	PC-5p-34802_44	up	inf	inf	0.232425	low
552	oan-miR-103-3p_R+1	up	inf	inf	0.235129	low
553	PC-3p-77847_11	down	-inf	-inf	0.235328	middle
554	PC-3p-40164_36	up	inf	inf	0.236521	low
555	PC-3p-48555_27	up	inf	inf	0.237022	low
556	chi-let-7c-3p	up	inf	inf	0.237818	low
557	PC-5p-74142_12	down	-inf	-inf	0.239283	middle
558	bta-mir-2904-2-p5_3	up	2.47897	1.30974	0.241967	high
559	bta-mir-2904-2-p3_2	up	2.47897	1.30974	0.241967	high
560	bta-mir-2904-2-p5_2	up	2.47897	1.30974	0.241967	high
561	bta-mir-2904-2-p5_1	up	2.47897	1.30974	0.241967	high
562	PC-3p-43952_31	up	inf	inf	0.242975	low
563	PC-5p-105931_6	down	-inf	-inf	0.244009	middle
564	hsa-miR-6529-3p_1ss15TC	up	inf	inf	0.244894	low
565	hsa-miR-23a-5p_R-1	up	inf	inf	0.245113	low
566	bta-miR-129-3p	up	inf	inf	0.245138	high
567	PC-3p-56310_21	down	-inf	-inf	0.245314	middle
568	PC-3p-113467_6	down	-inf	-inf	0.246666	middle
569	PC-3p-29510_54	up	inf	inf	0.247141	low
570	bta-miR-215_R-2	up	inf	inf	0.249277	middle
571	bta-miR-24_L+1R-2	up	inf	inf	0.249411	low
572	chi-mir-628-p3	down	-inf	-inf	0.249927	high
573	bta-mir-11986-p3	down	-inf	-inf	0.24999	middle
574	PC-5p-90694_8	down	-inf	-inf	0.255687	middle
575	hsa-miR-330-5p_R-1	up	inf	inf	0.257958	low
576	cfa-miR-330_R-1	up	inf	inf	0.257958	low
577	bta-miR-142-3p_L+3R-3	up	inf	inf	0.259994	low
578	PC-3p-37608_39	up	inf	inf	0.260624	low
579	PC-3p-101113_7	down	-inf	-inf	0.261102	middle
580	bta-miR-499	up	inf	inf	0.262211	low
581	bta-miR-10a_R-1	down	0.0160854	-5.9581	0.263537	middle
582	PC-5p-41362_34	down	-inf	-inf	0.263668	middle
583	bta-miR-199b	up	1.95776	0.969206	0.264419	middle
584	hsa-miR-130b-5p_R+1	up	1.79454	0.843613	0.26723	middle
585	PC-5p-65658_15	down	-inf	-inf	0.268714	middle
586	bta-miR-485	down	0.081738	-3.61285	0.27044	middle
587	mmu-mir-6240-p3_1ss11AG	up	inf	inf	0.270653	middle
588	PC-3p-56748_20	up	inf	inf	0.273425	low
589	PC-3p-40615_35	up	inf	inf	0.274417	low
590	bta-miR-335_R-1	up	inf	inf	0.274588	low
591	PC-3p-68064_14	down	-inf	-inf	0.275392	middle
592	PC-5p-73761_12	down	-inf	-inf	0.275392	middle
593	PC-3p-89736_8	down	-inf	-inf	0.275747	middle
594	hsa-miR-3195_L+3R-1	up	inf	inf	0.277122	low
595	bta-miR-199a-5p_R+1	up	1.6212	0.697063	0.277406	high
596	PC-3p-54404_22	down	-inf	-inf	0.277855	middle
597	bta-miR-99a-5p_R+1	down	0.728894	-0.456219	0.280078	high
598	PC-3p-78066_11	down	-inf	-inf	0.280136	middle
599	PC-3p-62574_17	down	-inf	-inf	0.280623	middle
600	bta-miR-1248_R-4	up	inf	inf	0.280992	low
601	eca-mir-8986a-p5	down	0.0779788	-3.68077	0.285179	middle
602	mmu-miR-2137_L-2R-1_1ss16AG	up	inf	inf	0.285585	low
603	PC-3p-68682_14	down	-inf	-inf	0.288252	middle
604	PC-3p-68391_14	down	-inf	-inf	0.288252	middle
605	ssc-miR-1839-3p_R+2_1ss11TA	up	inf	inf	0.289085	low
606	bta-miR-98	down	0.276014	-1.85719	0.290744	middle
607	cfa-miR-486_R+3	up	inf	inf	0.292725	low
608	bta-miR-187_R+1	up	inf	inf	0.29303	low
609	bta-miR-128	down	0.338161	-1.56422	0.294588	middle
610	bta-miR-665_R+2	up	3.06273	1.61482	0.294779	middle
611	mmu-mir-6240-p3_1ss16GT	up	2.68735	1.42618	0.294888	middle
612	hsa-miR-541-5p	up	inf	inf	0.298546	low
613	PC-3p-90572_8	down	-inf	-inf	0.298966	middle
614	bta-miR-26b	down	0.286458	-1.8036	0.303201	high
615	mmu-mir-6236-p5_1ss23TC	up	inf	inf	0.303757	middle
616	PC-5p-65935_15	down	-inf	-inf	0.304086	middle
617	hsa-miR-7-1-3p	up	inf	inf	0.305227	low
618	chi-miR-7-3p_L+1	up	inf	inf	0.305227	low
619	bta-miR-30d	up	1.2672	0.341649	0.306188	high
620	PC-3p-72356_13	down	-inf	-inf	0.308466	middle
621	PC-3p-76159_11	down	-inf	-inf	0.313067	middle
622	ggo-miR-516a_R-1	down	0.0141623	-6.14181	0.31336	middle
623	bta-miR-20a	down	0.378424	-1.40192	0.314585	middle
624	efu-miR-9277_L-2R+1	up	inf	inf	0.316944	low
625	bta-miR-122_R-3	up	inf	inf	0.31875	low
626	PC-5p-59951_18	down	-inf	-inf	0.321624	middle
627	PC-3p-59783_18	down	-inf	-inf	0.323239	middle
628	PC-3p-8775_184	up	inf	inf	0.324156	middle
629	bta-miR-142-5p_L+2R-2	up	inf	inf	0.324588	middle
630	PC-3p-59775_18	down	-inf	-inf	0.327625	middle
631	bta-miR-222_R+4	down	0.771729	-0.373835	0.330583	high
632	bta-let-7f	up	1.19781	0.260398	0.331432	middle
633	bta-miR-142-5p_L+2R-1	up	inf	inf	0.332258	middle
634	bta-miR-200b_R+1	down	0.00908371	-6.7825	0.33255	high
635	PC-3p-76891_11	down	-inf	-inf	0.333587	middle
636	pal-mir-10001-p3_1ss19CT	up	inf	inf	0.338799	low
637	PC-3p-72235_13	down	-inf	-inf	0.338864	middle
638	PC-3p-77483_11	down	-inf	-inf	0.339777	middle
639	hsa-miR-4448_1ss6CG	down	0.0714572	-3.80678	0.341176	middle
640	PC-3p-63320_17	down	-inf	-inf	0.349337	middle
641	bta-miR-181a_R+1	up	1.50503	0.589793	0.361431	high
642	bta-miR-504	up	inf	inf	0.36178	low
643	PC-3p-59310_19	up	inf	inf	0.363161	low
644	bta-miR-10b_R-1	down	0.198871	-2.3301	0.365365	high
645	oar-miR-154a-3p	up	inf	inf	0.370893	low
646	mmu-miR-1843b-3p_L-1R+4_1ss2CT	up	inf	inf	0.380646	low
647	bta-miR-92b	up	1.3144	0.394401	0.385222	middle
648	bta-miR-133a_L-1R+1	down	0.0110253	-6.50303	0.393959	high
649	bta-miR-206	down	0.000539567	-10.8559	0.394942	high
650	bta-miR-323_L-1	up	2.0984	1.06929	0.395404	middle
651	bta-miR-1	down	0.000855972	-10.1901	0.397914	high
652	bta-miR-708	up	2.04187	1.02989	0.40808	middle
653	bta-miR-132	down	0.459031	-1.12334	0.41214	middle
654	hsa-miR-16-2-3p_L+1R-1_1ss11CT	up	inf	inf	0.42265	low
655	bta-miR-29d-5p_L-1R+4	up	inf	inf	0.42265	low
656	bta-miR-29b_R-4	up	inf	inf	0.42265	low
657	hsa-miR-30c-1-3p	up	inf	inf	0.42265	low
658	hsa-miR-30c-2-3p	up	inf	inf	0.42265	low
659	bta-miR-32_R-2	up	inf	inf	0.42265	low
660	bta-miR-124b_R-4	up	inf	inf	0.42265	low
661	hsa-miR-129-1-3p_R+1_1ss20TC	up	inf	inf	0.42265	low
662	hsa-miR-136-3p	up	inf	inf	0.42265	low
663	bta-miR-141_R-1	up	inf	inf	0.42265	low
664	hsa-miR-144-5p_L+2R-3	up	inf	inf	0.42265	low
665	bta-miR-144_R-3	up	inf	inf	0.42265	low
666	hsa-miR-181c-3p_L-1R+1	up	inf	inf	0.42265	low
667	bta-miR-182_R-2	up	inf	inf	0.42265	low
668	hsa-miR-188-3p	up	inf	inf	0.42265	low
669	hsa-miR-192-3p	up	inf	inf	0.42265	low
670	chi-miR-197-5p_L+3	up	inf	inf	0.42265	low
671	mmu-miR-200b-5p_R-1	up	inf	inf	0.42265	low
672	bta-miR-212	up	inf	inf	0.42265	low
673	hsa-miR-218-2-3p_L-1R+1	up	inf	inf	0.42265	low
674	hsa-miR-218-1-3p_L+4R-2	up	inf	inf	0.42265	low
675	hsa-miR-223-5p_R+2	up	inf	inf	0.42265	low
676	hsa-miR-301a-5p	up	inf	inf	0.42265	low
677	bta-miR-301a_R-2	up	inf	inf	0.42265	low
678	oar-miR-323b	up	inf	inf	0.42265	low
679	oar-miR-323a-5p_R+1	up	inf	inf	0.42265	low
680	bta-miR-338_R-2	down	-inf	-inf	0.42265	middle
681	hsa-miR-370-5p_R+2	up	inf	inf	0.42265	low
682	hsa-miR-374c-5p_L-1R-2	up	inf	inf	0.42265	low
683	hsa-miR-374a-3p_1ss9AG	up	inf	inf	0.42265	low
684	bta-miR-376c_L+1R-1	up	inf	inf	0.42265	low
685	hsa-miR-376a-5p_R+1	up	inf	inf	0.42265	low
686	mmu-miR-377-5p	down	-inf	-inf	0.42265	middle
687	bta-mir-378b-p5_1ss16AG	up	inf	inf	0.42265	low
688	bta-miR-411b	up	inf	inf	0.42265	low
689	oar-miR-411b-3p_1ss6CA	up	inf	inf	0.42265	low
690	bta-miR-412_L-1R-1_2ss21TC22GT	up	inf	inf	0.42265	low
691	hsa-miR-433-5p_1ss19AG	up	inf	inf	0.42265	low
692	bta-miR-449c_R+5	up	inf	inf	0.42265	low
693	chi-miR-449b-3p_L+1R-1	up	inf	inf	0.42265	low
694	hsa-miR-487a-5p	up	inf	inf	0.42265	low
695	bta-miR-490_R+1	up	inf	inf	0.42265	low
696	hsa-miR-491-3p	up	inf	inf	0.42265	low
697	hsa-miR-495-5p_1ss16AC	up	inf	inf	0.42265	low
698	bta-miR-496	up	inf	inf	0.42265	low
699	bta-mir-502b-p5	up	inf	inf	0.42265	low
700	mmu-miR-543-5p_2ss11CT14GC	up	inf	inf	0.42265	low
701	hsa-miR-652-5p_L+1R-1	up	inf	inf	0.42265	low
702	bta-mir-660-p3	up	inf	inf	0.42265	low
703	bta-miR-677_R+3	up	inf	inf	0.42265	low
704	hsa-miR-744-3p_R-1	up	inf	inf	0.42265	low
705	bta-miR-1197	up	inf	inf	0.42265	low
706	rno-miR-1843b-3p_R+1	up	inf	inf	0.42265	low
707	bta-mir-2284y-1-p5	up	inf	inf	0.42265	low
708	bta-miR-2284z	up	inf	inf	0.42265	low
709	bta-miR-2284ab_R+1	up	inf	inf	0.42265	low
710	bta-miR-2285ce_L-1R-1	up	inf	inf	0.42265	low
711	bta-miR-2285bf_R-1_1ss20TC	up	inf	inf	0.42265	low
712	bta-miR-2285f	up	inf	inf	0.42265	low
713	bta-mir-2285e-2-p5	up	inf	inf	0.42265	low
714	bta-miR-2285k_R+1	up	inf	inf	0.42265	low
715	bta-miR-2285co_1ss19TC	up	inf	inf	0.42265	low
716	hsa-miR-2355-5p_R+1	up	inf	inf	0.42265	low
717	bta-miR-2403_R+2	up	inf	inf	0.42265	low
718	bta-miR-2424_L-5	up	inf	inf	0.42265	low
719	bta-miR-2447	up	inf	inf	0.42265	low
720	bta-miR-2448-3p	up	inf	inf	0.42265	low
721	bta-mir-12013-p3	up	inf	inf	0.42265	low
722	bta-miR-12031_L+2_1ss24CT	up	inf	inf	0.42265	low
723	bta-miR-101_R+2	up	inf	inf	0.42265	low
724	bta-miR-199c_L-1R+1	up	inf	inf	0.42265	low
725	bta-miR-200c_R-2	up	inf	inf	0.42265	low
726	hsa-miR-320d_R+1	up	inf	inf	0.42265	low
727	mmu-miR-370-3p_R+2	up	inf	inf	0.42265	low
728	eca-mir-769b-p3_1ss12CG	down	-inf	-inf	0.42265	middle
729	hsa-mir-1246-p3	down	-inf	-inf	0.42265	middle
730	oan-mir-1386-p3_1ss1GC	up	inf	inf	0.42265	low
731	bta-mir-2284w-p3	up	inf	inf	0.42265	low
732	bta-miR-2284w_R-1	up	inf	inf	0.42265	low
733	bta-miR-2285az_1ss5TA	up	inf	inf	0.42265	low
734	bta-mir-2285at-1-p5_1ss18TC	up	inf	inf	0.42265	low
735	rno-miR-3549_R+3_1ss5TC	up	inf	inf	0.42265	low
736	oar-miR-3955-5p_R+4_1ss12AT	up	inf	inf	0.42265	low
737	bta-miR-142-5p_R-1	up	inf	inf	0.42265	low
738	bta-mir-339b-p5	up	inf	inf	0.42265	low
739	ppy-mir-373-p3_1ss18AT	down	-inf	-inf	0.42265	middle
740	ppy-mir-373-p5_1ss18AT	down	-inf	-inf	0.42265	middle
741	hsa-miR-574-3p_R+2	up	inf	inf	0.42265	low
742	hsa-mir-663a-p3_1ss20GC	down	-inf	-inf	0.42265	middle
743	bta-mir-1246-p3_2ss1GT17AG	down	-inf	-inf	0.42265	middle
744	hsa-mir-1246-p3_1ss14AT	down	-inf	-inf	0.42265	middle
745	ppy-mir-1268-p5_1ss7TC	up	inf	inf	0.42265	low
746	hsa-mir-1843-p5_1ss18GA	up	inf	inf	0.42265	low
747	mmu-mir-3535-p3	up	inf	inf	0.42265	low
748	hsa-mir-3654-p5_1ss14TC	down	-inf	-inf	0.42265	middle
749	hsa-mir-3654-p3_1ss10TC	down	-inf	-inf	0.42265	middle
750	hsa-mir-6794-p3_1ss5CA	down	-inf	-inf	0.42265	middle
751	hsa-mir-6794-p5_1ss5CA	down	-inf	-inf	0.42265	middle
752	hsa-miR-6830-5p_L-1R-2_1ss2CA	down	-inf	-inf	0.42265	middle
753	mmu-mir-7079-p3_1ss9AT	down	-inf	-inf	0.42265	middle
754	eca-mir-9182-p3_1ss6GA	down	-inf	-inf	0.42265	middle
755	efu-mir-9277-p5_1ss10CA	up	inf	inf	0.42265	low
756	cja-mir-9933-p5_1ss2TA	up	inf	inf	0.42265	low
757	mdo-mir-12297e-1-p5_1ss14CA	down	-inf	-inf	0.42265	middle
758	bta-let-7b_R-2_1ss1TG	down	-inf	-inf	0.42265	middle
759	oan-miR-23b-3p_R+1	up	inf	inf	0.42265	low
760	sha-miR-125a_R+2	up	inf	inf	0.42265	low
761	hsa-miR-130a-5p	up	inf	inf	0.42265	low
762	chi-miR-130a-5p	up	inf	inf	0.42265	low
763	mmu-miR-146a-5p_R+2	up	inf	inf	0.42265	low
764	mdo-miR-152-3p_R+3	up	inf	inf	0.42265	low
765	bta-miR-199c_L-1R+3	up	inf	inf	0.42265	low
766	mdo-miR-204_R+3	up	inf	inf	0.42265	low
767	bta-miR-216b	up	inf	inf	0.42265	low
768	efu-miR-222_R-2_1ss1GT	down	-inf	-inf	0.42265	middle
769	oan-miR-222a-5p_R+1_1ss1CT	down	-inf	-inf	0.42265	middle
770	mmu-miR-434-3p	up	inf	inf	0.42265	low
771	mdo-miR-460-5p_1ss21TC	down	-inf	-inf	0.42265	middle
772	cja-miR-483_R+2_1ss22CT	up	inf	inf	0.42265	low
773	hsa-miR-512-3p_R+1	up	inf	inf	0.42265	low
774	ggo-miR-518e-5p_R-1	up	inf	inf	0.42265	low
775	hsa-miR-1246_L+1R+3	down	-inf	-inf	0.42265	middle
776	hsa-miR-1469_L-2R-2_1ss10GC	up	inf	inf	0.42265	low
777	hsa-miR-3168_R+1_1ss14AC	down	-inf	-inf	0.42265	high
778	hsa-miR-4454_L-2_1ss4TA	up	inf	inf	0.42265	low
779	bta-miR-6119-5p	up	inf	inf	0.42265	low
780	bta-miR-6119-3p_L-1_1ss23AT	up	inf	inf	0.42265	low
781	bta-miR-6524_R+1	up	inf	inf	0.42265	low
782	pal-miR-9226-5p_1ss12TC	up	inf	inf	0.42265	low
783	PC-3p-105079_6	down	-inf	-inf	0.42265	middle
784	PC-5p-89276_8	down	-inf	-inf	0.42265	middle
785	PC-3p-94220_7	down	-inf	-inf	0.42265	middle
786	PC-5p-133504_5	up	inf	inf	0.42265	low
787	PC-3p-147756_5	up	inf	inf	0.42265	low
788	PC-5p-125164_5	down	-inf	-inf	0.42265	middle
789	PC-3p-102182_6	down	-inf	-inf	0.42265	middle
790	PC-3p-127004_5	down	-inf	-inf	0.42265	middle
791	PC-3p-112675_6	down	-inf	-inf	0.42265	middle
792	PC-5p-136930_5	down	-inf	-inf	0.42265	middle
793	PC-5p-84137_9	down	-inf	-inf	0.42265	middle
794	PC-3p-113643_6	down	-inf	-inf	0.42265	middle
795	PC-3p-123553_5	down	-inf	-inf	0.42265	middle
796	PC-5p-110796_6	down	-inf	-inf	0.42265	middle
797	PC-5p-101181_7	down	-inf	-inf	0.42265	middle
798	PC-3p-102084_6	down	-inf	-inf	0.42265	middle
799	PC-3p-89234_8	down	-inf	-inf	0.42265	middle
800	PC-3p-111765_6	down	-inf	-inf	0.42265	middle
801	PC-5p-140926_5	down	-inf	-inf	0.42265	middle
802	PC-5p-120393_5	down	-inf	-inf	0.42265	middle
803	PC-5p-83998_9	down	-inf	-inf	0.42265	middle
804	PC-5p-143978_5	down	-inf	-inf	0.42265	middle
805	PC-5p-71489_13	down	-inf	-inf	0.42265	middle
806	PC-5p-102292_6	down	-inf	-inf	0.42265	middle
807	PC-3p-95659_7	down	-inf	-inf	0.42265	middle
808	PC-5p-82377_10	down	-inf	-inf	0.42265	middle
809	PC-3p-139718_5	down	-inf	-inf	0.42265	middle
810	PC-3p-119577_5	down	-inf	-inf	0.42265	middle
811	PC-3p-92827_7	down	-inf	-inf	0.42265	middle
812	PC-3p-121268_5	down	-inf	-inf	0.42265	middle
813	PC-3p-134989_5	down	-inf	-inf	0.42265	middle
814	PC-5p-128794_5	down	-inf	-inf	0.42265	middle
815	PC-3p-119537_5	down	-inf	-inf	0.42265	middle
816	PC-3p-131559_5	down	-inf	-inf	0.42265	middle
817	PC-5p-146432_5	down	-inf	-inf	0.42265	middle
818	PC-5p-95795_7	down	-inf	-inf	0.42265	middle
819	PC-5p-78834_11	down	-inf	-inf	0.42265	middle
820	PC-5p-136974_5	down	-inf	-inf	0.42265	middle
821	PC-5p-83746_9	down	-inf	-inf	0.42265	middle
822	PC-3p-102483_6	down	-inf	-inf	0.42265	middle
823	PC-5p-76758_11	down	-inf	-inf	0.42265	middle
824	PC-5p-94725_7	down	-inf	-inf	0.42265	middle
825	PC-3p-143010_5	down	-inf	-inf	0.42265	middle
826	PC-3p-123835_5	down	-inf	-inf	0.42265	middle
827	PC-5p-96407_7	down	-inf	-inf	0.42265	middle
828	PC-5p-119726_5	down	-inf	-inf	0.42265	middle
829	PC-3p-110304_6	down	-inf	-inf	0.42265	middle
830	PC-3p-145010_5	down	-inf	-inf	0.42265	middle
831	PC-5p-141409_5	down	-inf	-inf	0.42265	middle
832	PC-3p-98421_7	down	-inf	-inf	0.42265	middle
833	PC-3p-130622_5	down	-inf	-inf	0.42265	middle
834	PC-3p-138621_5	down	-inf	-inf	0.42265	middle
835	PC-3p-121078_5	down	-inf	-inf	0.42265	middle
836	PC-5p-138191_5	down	-inf	-inf	0.42265	middle
837	PC-3p-140699_5	down	-inf	-inf	0.42265	middle
838	PC-5p-107685_6	down	-inf	-inf	0.42265	middle
839	PC-5p-98487_7	down	-inf	-inf	0.42265	middle
840	PC-3p-84312_9	down	-inf	-inf	0.42265	middle
841	PC-5p-85848_9	down	-inf	-inf	0.42265	middle
842	PC-3p-111542_6	down	-inf	-inf	0.42265	middle
843	PC-5p-132316_5	down	-inf	-inf	0.42265	middle
844	PC-5p-119230_5	down	-inf	-inf	0.42265	middle
845	PC-5p-107580_6	down	-inf	-inf	0.42265	middle
846	PC-5p-119548_5	down	-inf	-inf	0.42265	middle
847	PC-3p-93233_7	down	-inf	-inf	0.42265	middle
848	PC-5p-109836_6	down	-inf	-inf	0.42265	middle
849	PC-3p-89007_8	down	-inf	-inf	0.42265	middle
850	PC-3p-116195_6	down	-inf	-inf	0.42265	middle
851	PC-3p-84080_9	down	-inf	-inf	0.42265	middle
852	PC-3p-80337_10	down	-inf	-inf	0.42265	middle
853	PC-5p-110034_6	down	-inf	-inf	0.42265	middle
854	PC-5p-102278_6	down	-inf	-inf	0.42265	middle
855	PC-5p-84944_9	down	-inf	-inf	0.42265	middle
856	PC-5p-111418_6	down	-inf	-inf	0.42265	middle
857	PC-5p-111523_6	down	-inf	-inf	0.42265	middle
858	PC-5p-118400_5	down	-inf	-inf	0.42265	middle
859	PC-5p-133756_5	down	-inf	-inf	0.42265	middle
860	PC-3p-135774_5	down	-inf	-inf	0.42265	middle
861	PC-5p-137347_5	down	-inf	-inf	0.42265	middle
862	PC-5p-93617_7	down	-inf	-inf	0.42265	middle
863	PC-3p-131378_5	down	-inf	-inf	0.42265	middle
864	PC-5p-107337_6	down	-inf	-inf	0.42265	middle
865	PC-3p-120873_5	down	-inf	-inf	0.42265	middle
866	PC-3p-135022_5	down	-inf	-inf	0.42265	middle
867	PC-3p-134341_5	down	-inf	-inf	0.42265	middle
868	PC-3p-126963_5	down	-inf	-inf	0.42265	middle
869	PC-3p-137979_5	down	-inf	-inf	0.42265	middle
870	PC-3p-138602_5	down	-inf	-inf	0.42265	middle
871	PC-3p-138222_5	down	-inf	-inf	0.42265	middle
872	PC-3p-97697_7	down	-inf	-inf	0.42265	middle
873	PC-3p-118461_5	down	-inf	-inf	0.42265	middle
874	PC-5p-118788_5	down	-inf	-inf	0.42265	middle
875	PC-3p-141433_5	down	-inf	-inf	0.42265	middle
876	PC-5p-96330_7	down	-inf	-inf	0.42265	middle
877	PC-3p-121721_5	down	-inf	-inf	0.42265	middle
878	PC-5p-105585_6	down	-inf	-inf	0.42265	middle
879	PC-3p-108784_6	down	-inf	-inf	0.42265	middle
880	PC-5p-101461_6	down	-inf	-inf	0.42265	middle
881	PC-5p-130629_5	down	-inf	-inf	0.42265	middle
882	PC-3p-122802_5	down	-inf	-inf	0.42265	middle
883	PC-5p-87025_8	down	-inf	-inf	0.42265	middle
884	PC-5p-137961_5	down	-inf	-inf	0.42265	middle
885	PC-3p-79515_10	down	-inf	-inf	0.42265	middle
886	PC-3p-117671_6	down	-inf	-inf	0.42265	middle
887	PC-3p-124150_5	down	-inf	-inf	0.42265	middle
888	PC-3p-141762_5	down	-inf	-inf	0.42265	middle
889	PC-5p-119008_5	down	-inf	-inf	0.42265	middle
890	PC-5p-143526_5	down	-inf	-inf	0.42265	middle
891	PC-3p-124486_5	down	-inf	-inf	0.42265	middle
892	PC-3p-130939_5	down	-inf	-inf	0.42265	middle
893	PC-3p-111934_6	down	-inf	-inf	0.42265	middle
894	PC-5p-134331_5	down	-inf	-inf	0.42265	middle
895	PC-3p-103577_6	down	-inf	-inf	0.42265	middle
896	PC-3p-97267_7	down	-inf	-inf	0.42265	middle
897	PC-3p-91395_8	down	-inf	-inf	0.42265	middle
898	PC-3p-131305_5	down	-inf	-inf	0.42265	middle
899	PC-3p-110380_6	down	-inf	-inf	0.42265	middle
900	PC-3p-101510_6	down	-inf	-inf	0.42265	middle
901	PC-3p-87592_8	down	-inf	-inf	0.42265	middle
902	PC-3p-94524_7	down	-inf	-inf	0.42265	middle
903	PC-5p-108055_6	down	-inf	-inf	0.42265	middle
904	PC-5p-89075_8	down	-inf	-inf	0.42265	middle
905	PC-3p-123079_5	down	-inf	-inf	0.42265	middle
906	PC-3p-96969_7	down	-inf	-inf	0.42265	middle
907	PC-5p-119114_5	down	-inf	-inf	0.42265	middle
908	PC-3p-119712_5	down	-inf	-inf	0.42265	middle
909	PC-3p-122815_5	down	-inf	-inf	0.42265	middle
910	PC-5p-117692_6	down	-inf	-inf	0.42265	middle
911	PC-3p-94264_7	down	-inf	-inf	0.42265	middle
912	PC-5p-134404_5	down	-inf	-inf	0.42265	middle
913	PC-3p-130940_5	down	-inf	-inf	0.42265	middle
914	PC-5p-134636_5	down	-inf	-inf	0.42265	middle
915	PC-3p-131243_5	down	-inf	-inf	0.42265	middle
916	PC-5p-103358_6	down	-inf	-inf	0.42265	middle
917	PC-3p-134941_5	down	-inf	-inf	0.42265	middle
918	PC-3p-127268_5	down	-inf	-inf	0.42265	middle
919	PC-3p-83591_9	down	-inf	-inf	0.42265	middle
920	PC-5p-133074_5	down	-inf	-inf	0.42265	middle
921	PC-3p-127079_5	down	-inf	-inf	0.42265	middle
922	PC-5p-124019_5	down	-inf	-inf	0.42265	middle
923	PC-5p-133609_5	down	-inf	-inf	0.42265	middle
924	PC-5p-147450_5	down	-inf	-inf	0.42265	middle
925	PC-3p-147489_5	down	-inf	-inf	0.42265	middle
926	PC-3p-120861_5	down	-inf	-inf	0.42265	middle
927	PC-5p-137398_5	down	-inf	-inf	0.42265	middle
928	PC-3p-85689_9	down	-inf	-inf	0.42265	middle
929	PC-5p-96683_7	down	-inf	-inf	0.42265	middle
930	PC-3p-98212_7	down	-inf	-inf	0.42265	middle
931	PC-3p-140570_5	down	-inf	-inf	0.42265	middle
932	PC-3p-135303_5	down	-inf	-inf	0.42265	middle
933	PC-3p-91649_8	down	-inf	-inf	0.42265	middle
934	PC-5p-144583_5	down	-inf	-inf	0.42265	middle
935	PC-5p-106047_6	down	-inf	-inf	0.42265	middle
936	PC-3p-117222_6	down	-inf	-inf	0.42265	middle
937	PC-5p-90517_8	down	-inf	-inf	0.42265	middle
938	PC-3p-115370_6	down	-inf	-inf	0.42265	middle
939	PC-3p-135459_5	down	-inf	-inf	0.42265	middle
940	PC-3p-123067_5	down	-inf	-inf	0.42265	middle
941	PC-5p-113851_6	down	-inf	-inf	0.42265	middle
942	PC-5p-107387_6	down	-inf	-inf	0.42265	middle
943	PC-3p-143022_5	down	-inf	-inf	0.42265	middle
944	PC-3p-144664_5	down	-inf	-inf	0.42265	middle
945	PC-3p-141320_5	down	-inf	-inf	0.42265	middle
946	PC-5p-106590_6	down	-inf	-inf	0.42265	middle
947	PC-3p-117265_6	down	-inf	-inf	0.42265	middle
948	PC-3p-141607_5	down	-inf	-inf	0.42265	middle
949	PC-5p-145300_5	down	-inf	-inf	0.42265	middle
950	PC-3p-108800_6	down	-inf	-inf	0.42265	middle
951	PC-5p-146931_5	down	-inf	-inf	0.42265	middle
952	PC-5p-137859_5	down	-inf	-inf	0.42265	middle
953	PC-3p-125334_5	down	-inf	-inf	0.42265	middle
954	PC-3p-142635_5	down	-inf	-inf	0.42265	middle
955	PC-5p-34733_44	up	inf	inf	0.42265	middle
956	PC-5p-76664_11	down	-inf	-inf	0.42265	middle
957	PC-5p-93815_7	down	-inf	-inf	0.42265	middle
958	PC-3p-100911_7	down	-inf	-inf	0.42265	middle
959	PC-3p-91449_8	down	-inf	-inf	0.42265	middle
960	PC-3p-132879_5	down	-inf	-inf	0.42265	middle
961	PC-3p-109751_6	down	-inf	-inf	0.42265	middle
962	PC-3p-96565_7	down	-inf	-inf	0.42265	middle
963	PC-3p-102234_6	down	-inf	-inf	0.42265	middle
964	PC-3p-113511_6	down	-inf	-inf	0.42265	middle
965	PC-3p-92615_7	down	-inf	-inf	0.42265	middle
966	PC-3p-139529_5	down	-inf	-inf	0.42265	middle
967	PC-3p-83946_9	down	-inf	-inf	0.42265	middle
968	PC-5p-142912_5	down	-inf	-inf	0.42265	middle
969	PC-5p-146133_5	down	-inf	-inf	0.42265	middle
970	PC-5p-94588_7	down	-inf	-inf	0.42265	middle
971	PC-3p-88627_8	down	-inf	-inf	0.42265	middle
972	PC-3p-137871_5	down	-inf	-inf	0.42265	middle
973	PC-5p-118630_5	down	-inf	-inf	0.42265	middle
974	PC-3p-142388_5	down	-inf	-inf	0.42265	middle
975	PC-3p-109914_6	down	-inf	-inf	0.42265	middle
976	PC-5p-123989_5	down	-inf	-inf	0.42265	middle
977	PC-3p-95704_7	down	-inf	-inf	0.42265	middle
978	PC-3p-95119_7	down	-inf	-inf	0.42265	middle
979	PC-5p-131751_5	down	-inf	-inf	0.42265	middle
980	PC-5p-88929_8	down	-inf	-inf	0.42265	middle
981	PC-5p-108749_6	down	-inf	-inf	0.42265	middle
982	PC-3p-114287_6	down	-inf	-inf	0.42265	middle
983	PC-3p-146561_5	down	-inf	-inf	0.42265	middle
984	PC-3p-119930_5	down	-inf	-inf	0.42265	middle
985	PC-3p-131279_5	down	-inf	-inf	0.42265	middle
986	PC-5p-140682_5	down	-inf	-inf	0.42265	middle
987	PC-5p-141581_5	down	-inf	-inf	0.42265	middle
988	PC-3p-132945_5	down	-inf	-inf	0.42265	middle
989	PC-3p-132890_5	down	-inf	-inf	0.42265	middle
990	PC-3p-128621_5	down	-inf	-inf	0.42265	middle
991	PC-5p-111511_6	down	-inf	-inf	0.42265	middle
992	PC-5p-80823_10	down	-inf	-inf	0.42265	middle
993	PC-3p-81613_10	down	-inf	-inf	0.42265	middle
994	PC-3p-132112_5	down	-inf	-inf	0.42265	middle
995	PC-3p-95707_7	down	-inf	-inf	0.42265	middle
996	PC-5p-93231_7	down	-inf	-inf	0.42265	middle
997	PC-5p-144653_5	down	-inf	-inf	0.42265	middle
998	PC-5p-140687_5	down	-inf	-inf	0.42265	middle
999	PC-5p-102694_6	down	-inf	-inf	0.42265	middle
1000	PC-3p-144359_5	down	-inf	-inf	0.42265	middle
1001	PC-3p-118399_5	down	-inf	-inf	0.42265	middle
1002	PC-5p-77684_11	up	inf	inf	0.42265	low
1003	PC-3p-146547_5	down	-inf	-inf	0.42265	middle
1004	PC-5p-113852_6	down	-inf	-inf	0.42265	middle
1005	PC-3p-124144_5	down	-inf	-inf	0.42265	middle
1006	PC-5p-93268_7	down	-inf	-inf	0.42265	middle
1007	PC-3p-141639_5	down	-inf	-inf	0.42265	middle
1008	PC-3p-129571_5	down	-inf	-inf	0.42265	middle
1009	PC-3p-119446_5	down	-inf	-inf	0.42265	middle
1010	PC-3p-127225_5	down	-inf	-inf	0.42265	middle
1011	PC-5p-92532_7	down	-inf	-inf	0.42265	middle
1012	PC-5p-88005_8	down	-inf	-inf	0.42265	middle
1013	PC-3p-83249_9	down	-inf	-inf	0.42265	middle
1014	PC-3p-107581_6	down	-inf	-inf	0.42265	middle
1015	PC-5p-105612_6	down	-inf	-inf	0.42265	middle
1016	PC-3p-127779_5	down	-inf	-inf	0.42265	middle
1017	PC-3p-130526_5	down	-inf	-inf	0.42265	middle
1018	PC-3p-110140_6	down	-inf	-inf	0.42265	middle
1019	PC-5p-109755_6	down	-inf	-inf	0.42265	middle
1020	PC-3p-68832_14	up	inf	inf	0.42265	low
1021	PC-5p-109223_6	down	-inf	-inf	0.42265	middle
1022	PC-3p-139872_5	down	-inf	-inf	0.42265	middle
1023	PC-5p-123614_5	down	-inf	-inf	0.42265	middle
1024	PC-5p-129479_5	down	-inf	-inf	0.42265	middle
1025	PC-5p-135133_5	down	-inf	-inf	0.42265	middle
1026	PC-3p-147654_5	down	-inf	-inf	0.42265	middle
1027	PC-5p-132713_5	down	-inf	-inf	0.42265	middle
1028	PC-3p-125405_5	down	-inf	-inf	0.42265	middle
1029	PC-5p-136116_5	down	-inf	-inf	0.42265	middle
1030	PC-5p-88374_8	down	-inf	-inf	0.42265	middle
1031	PC-3p-129831_5	down	-inf	-inf	0.42265	middle
1032	PC-5p-89839_8	down	-inf	-inf	0.42265	middle
1033	PC-5p-119276_5	down	-inf	-inf	0.42265	middle
1034	PC-5p-121969_5	down	-inf	-inf	0.42265	middle
1035	PC-3p-80448_10	down	-inf	-inf	0.42265	middle
1036	PC-3p-121614_5	down	-inf	-inf	0.42265	middle
1037	PC-3p-122936_5	down	-inf	-inf	0.42265	middle
1038	PC-3p-128142_5	down	-inf	-inf	0.42265	middle
1039	PC-3p-97247_7	down	-inf	-inf	0.42265	middle
1040	PC-5p-77565_11	down	-inf	-inf	0.42265	middle
1041	PC-3p-135429_5	down	-inf	-inf	0.42265	middle
1042	PC-3p-142443_5	down	-inf	-inf	0.42265	middle
1043	PC-3p-138746_5	down	-inf	-inf	0.42265	middle
1044	PC-3p-91980_8	down	-inf	-inf	0.42265	middle
1045	PC-5p-143715_5	down	-inf	-inf	0.42265	middle
1046	PC-3p-133128_5	down	-inf	-inf	0.42265	middle
1047	PC-3p-106378_6	down	-inf	-inf	0.42265	middle
1048	PC-5p-134338_5	down	-inf	-inf	0.42265	middle
1049	PC-5p-130155_5	down	-inf	-inf	0.42265	middle
1050	PC-5p-148376_5	down	-inf	-inf	0.42265	middle
1051	PC-5p-119525_5	down	-inf	-inf	0.42265	middle
1052	PC-5p-144053_5	down	-inf	-inf	0.42265	middle
1053	PC-5p-119545_5	down	-inf	-inf	0.42265	middle
1054	PC-5p-100469_7	down	-inf	-inf	0.42265	middle
1055	PC-3p-144642_5	down	-inf	-inf	0.42265	middle
1056	PC-3p-135205_5	down	-inf	-inf	0.42265	middle
1057	PC-3p-138909_5	down	-inf	-inf	0.42265	middle
1058	PC-3p-135373_5	down	-inf	-inf	0.42265	middle
1059	PC-3p-128116_5	down	-inf	-inf	0.42265	middle
1060	PC-3p-132786_5	down	-inf	-inf	0.42265	middle
1061	PC-5p-96108_7	down	-inf	-inf	0.42265	middle
1062	PC-3p-85443_9	down	-inf	-inf	0.42265	middle
1063	PC-5p-112713_6	down	-inf	-inf	0.42265	middle
1064	PC-5p-134606_5	down	-inf	-inf	0.42265	middle
1065	PC-5p-101152_7	down	-inf	-inf	0.42265	middle
1066	PC-3p-96711_7	down	-inf	-inf	0.42265	middle
1067	PC-3p-69012_14	down	-inf	-inf	0.42265	middle
1068	PC-5p-107713_6	down	-inf	-inf	0.42265	middle
1069	PC-3p-84716_9	down	-inf	-inf	0.42265	middle
1070	PC-3p-116186_6	down	-inf	-inf	0.42265	middle
1071	PC-5p-100021_7	down	-inf	-inf	0.42265	middle
1072	PC-3p-116326_6	down	-inf	-inf	0.42265	middle
1073	PC-3p-76419_11	down	-inf	-inf	0.42265	middle
1074	PC-5p-139583_5	down	-inf	-inf	0.42265	middle
1075	PC-3p-105364_6	down	-inf	-inf	0.42265	middle
1076	PC-3p-142959_5	down	-inf	-inf	0.42265	middle
1077	PC-3p-120219_5	down	-inf	-inf	0.42265	middle
1078	PC-3p-123752_5	down	-inf	-inf	0.42265	middle
1079	PC-5p-127413_5	down	-inf	-inf	0.42265	middle
1080	PC-3p-144179_5	down	-inf	-inf	0.42265	middle
1081	PC-5p-108834_6	down	-inf	-inf	0.42265	middle
1082	PC-3p-124319_5	down	-inf	-inf	0.42265	middle
1083	PC-3p-126428_5	down	-inf	-inf	0.42265	middle
1084	PC-3p-129181_5	down	-inf	-inf	0.42265	middle
1085	PC-3p-136655_5	down	-inf	-inf	0.42265	middle
1086	PC-3p-111756_6	down	-inf	-inf	0.42265	middle
1087	PC-5p-131745_5	down	-inf	-inf	0.42265	middle
1088	PC-3p-105233_6	down	-inf	-inf	0.42265	middle
1089	PC-3p-81805_10	down	-inf	-inf	0.42265	middle
1090	PC-3p-104933_6	down	-inf	-inf	0.42265	middle
1091	PC-3p-116977_6	down	-inf	-inf	0.42265	middle
1092	PC-5p-109811_6	down	-inf	-inf	0.42265	middle
1093	PC-5p-117080_6	down	-inf	-inf	0.42265	middle
1094	PC-3p-67441_15	up	inf	inf	0.42265	low
1095	bta-miR-205	down	0.0145565	-6.10219	0.422962	high
1096	bta-miR-133b_R-1	down	0.00185828	-9.07182	0.423366	middle
1097	mdo-miR-203_1ss11TC	down	0.00262156	-8.57536	0.42366	high
1098	bta-miR-429	down	0.00283402	-8.46294	0.423742	middle
1099	bta-miR-200a	down	0.00416711	-7.90674	0.424257	high
1100	mmu-mir-6236-p5_1ss18TC	down	0.00488062	-7.67872	0.424533	middle
1101	ggo-miR-524-5p_R-1	down	0.0054283	-7.52528	0.424745	middle
1102	hsa-miR-133a-5p	down	0.00955364	-6.70973	0.426345	middle
1103	mdo-miR-31-5p_L-2_1ss3AT	down	0.0129231	-6.2739	0.427658	middle
1104	bta-miR-582	down	0.0136033	-6.1999	0.427924	middle
1105	bta-miR-223_R+1	down	0.500352	-0.998986	0.43294	middle
1106	oar-mir-376d-p3	down	0.0322773	-4.95333	0.435294	middle
1107	oar-mir-376a-p3	down	0.0322773	-4.95333	0.435294	middle
1108	cja-mir-376b-p3	down	0.0322773	-4.95333	0.435294	middle
1109	bta-miR-454_R+2	down	0.0407855	-4.6158	0.43868	middle
1110	hsa-miR-132-5p	down	0.0507858	-4.29943	0.442712	middle
1111	bta-miR-99b	down	0.701082	-0.512345	0.444169	high
1112	bta-miR-211_R+1	down	0.0559371	-4.16005	0.444802	middle
1113	mmu-miR-6240_R-6_1ss1CA	up	1.74724	0.805075	0.449875	middle
1114	PC-3p-45213_30	down	0.0690291	-3.85665	0.450194	middle
1115	hsa-miR-320b_R+1	down	0.0989896	-3.33658	0.462764	middle
1116	bta-miR-30b-5p	down	0.629686	-0.667295	0.475545	middle
1117	bta-miR-29c	down	0.130847	-2.93404	0.47644	middle
1118	hsa-miR-338-5p_R-1	down	0.143158	-2.80432	0.481815	middle
1119	bta-miR-184	down	0.151161	-2.72585	0.485608	high
1120	bta-miR-451_R-2	down	0.407955	-1.29352	0.504972	middle
1121	bta-miR-148b	up	1.19378	0.255534	0.506026	middle
1122	bta-miR-192_R-2	up	1.88679	0.915931	0.507082	middle
1123	hsa-miR-125b-2-3p_L-2R+2	up	1.81453	0.859598	0.507574	middle
1124	bta-miR-1307_R+1	up	1.27556	0.351131	0.511078	middle
1125	bta-miR-204	down	0.266831	-1.906	0.511344	high
1126	efu-miR-9226_L-2R-2_1ss4AG	down	0.255035	-1.97123	0.535015	middle
1127	bta-miR-218_R-1	down	0.266606	-1.90722	0.540057	middle
1128	hsa-miR-376c-3p	down	0.288431	-1.7937	0.552225	middle
1129	bta-miR-193a-3p_R-2	down	0.302845	-1.72335	0.557932	middle
1130	bta-miR-126-3p_L+1	down	0.685895	-0.54394	0.56701	high
1131	bta-miR-16a_1ss21TC	down	0.620593	-0.68828	0.574864	middle
1132	bta-miR-16b_R+1	down	0.620593	-0.68828	0.574864	middle
1133	bta-let-7a-5p_L+1R-1	down	0.343467	-1.54176	0.578936	middle
1134	hsa-miR-542-3p	down	0.357121	-1.48552	0.588868	middle
1135	bta-miR-125b	up	1.19594	0.258142	0.596266	high
1136	bta-miR-185	up	1.42848	0.514483	0.602273	middle
1137	bta-miR-1468	up	1.43721	0.523266	0.603968	middle
1138	bta-miR-432	down	0.404408	-1.30612	0.612563	middle
1139	bta-miR-495	down	0.416128	-1.2649	0.625328	middle
1140	bta-miR-379	up	1.59337	0.672079	0.626638	middle
1141	PC-5p-8335_193	down	0.447946	-1.1586	0.641782	middle
1142	bta-miR-221_R+1	up	1.14113	0.190458	0.649058	middle
1143	bta-miR-25	down	0.871625	-0.19822	0.659289	high
1144	bta-miR-15a_R+1	up	1.49839	0.583413	0.678052	middle
1145	chi-let-7b-5p_R+1	down	0.820797	-0.284903	0.684402	high
1146	bta-miR-130a	down	0.590893	-0.759031	0.724642	middle
1147	chi-miR-130a-3p_R+1	down	0.590893	-0.759031	0.724642	middle
1148	hsa-miR-4448_R-2_1ss6CG	down	0.596107	-0.746356	0.726534	middle
1149	bta-miR-26a	down	0.776411	-0.365108	0.728655	high
1150	bta-miR-154c	up	1.40225	0.487748	0.739542	middle
1151	bta-let-7g	up	1.01832	0.0261917	0.762514	middle
1152	chi-miR-92a-5p_1ss12AG	down	0.654012	-0.612611	0.762531	middle
1153	efu-miR-9226_L-1_1ss22GA	up	1.34334	0.425827	0.764181	middle
1154	bta-miR-1271	up	1.23826	0.308314	0.787533	middle
1155	bta-miR-22-5p	down	0.72187	-0.470189	0.807238	middle
1156	bta-miR-140_L-1R+1	down	0.90216	-0.148545	0.815225	high
1157	hsa-miR-193b-5p	down	0.854937	-0.22611	0.827492	middle
1158	bta-miR-30a-5p	up	1.07357	0.102411	0.828344	middle
1159	bta-miR-146a_R-2_1ss18AG	down	0.774992	-0.367746	0.844497	middle
1160	bta-miR-21-5p_R-1	down	0.966414	-0.0492867	0.851058	high
1161	bta-miR-134_1ss20TG	down	0.790124	-0.339848	0.856248	middle
1162	bta-miR-382	up	1.11466	0.156599	0.867446	middle
1163	bta-miR-150_R-1	down	0.830159	-0.268541	0.88083	middle
1164	bta-miR-19b	down	0.856417	-0.223614	0.90023	middle
1165	PC-5p-6423_243	up	1.14346	0.193403	0.90384	middle
1166	bta-let-7a-5p	up	1.01144	0.0164159	0.947229	high
1167	hsa-miR-411-3p_R-1	down	0.954318	-0.067458	0.97137	middle
1168	bta-miR-2284x_L-1R+2	down	0.989839	-0.0147341	0.992852	middle
