# Supplementary material for: Whole-Transcriptome Sequencing of Antler Tissue Reveals That circRNA2829 Regulates Chondrocyte Proliferation and Differentiation via the miR-4286-R+1/FOXO4 Axis
Source: Int J Mol Sci. 2023 Apr 13;24(8):7204. doi: 10.3390/ijms24087204 (PMC10139046; doi:10.3390/ijms24087204)
Supplement: Supplementary file 1 [file ijms-24-07204-s001.zip › SupplementaryFile3.xlsx]

## Sheet: Sheet1
Supplementary File S3. Differentially expressed mRNA in CvsM
gene_id	Description	fc	log2(fc)	pval	qval	regulation	significant
MSTRG.33670	TPD52L1 [Cervus elaphus hippelaphus];tumor protein D53 isoform X2 [Odocoileus virginianus texanus]	202187	17.6253	3.0458e-24	2.68335e-20	up	yes
MSTRG.17242	hypothetical protein Celaphus_00015504 [Cervus elaphus hippelaphus]	1.77007e+06	20.7554	3.45601e-21	2.28356e-17	up	yes
MSTRG.37419	dehydrogenase/reductase SDR family member 9 isoform X1 [Odocoileus virginianus texanus]	68.3406	6.09467	1.39208e-19	7.35856e-16	up	yes
MSTRG.10536	MATK [Cervus elaphus hippelaphus]	1216.8	10.2489	3.75685e-19	1.65489e-15	up	yes
MSTRG.7714	hypothetical protein Celaphus_00017302 [Cervus elaphus hippelaphus]	31272.7	14.9326	5.41412e-19	2.04422e-15	up	yes
MSTRG.17452	hypothetical protein Celaphus_00015565 [Cervus elaphus hippelaphus]	115480	16.8173	3.53351e-18	1.12162e-14	up	yes
MSTRG.34208	MFAP3L [Cervus elaphus hippelaphus]	53141.8	15.6976	3.81936e-18	1.12162e-14	up	yes
MSTRG.24841	S100A12 [Cervus elaphus hippelaphus]	154.092	7.26765	4.50234e-18	1.18997e-14	up	yes
MSTRG.9804	RUFY4, partial [Cervus elaphus hippelaphus];hypothetical protein Celaphus_00015042, partial [Cervus elaphus hippelaphus]	1.49096e+06	20.5078	6.68182e-18	1.47167e-14	up	yes
MSTRG.3168	C-type lectin domain family 3 member A [Odocoileus virginianus texanus]	3993.15	11.9633	1.35928e-17	2.76351e-14	up	yes
MSTRG.14051	EPCAM [Cervus elaphus hippelaphus]	81427.7	16.3132	2.40456e-16	4.23683e-13	up	yes
MSTRG.38505	BTK [Cervus elaphus hippelaphus]	31.0989	4.95879	6.9852e-16	1.15387e-12	up	yes
MSTRG.24836	uncharacterized protein LOC105306151 [Pteropus vampyrus]	147.254	7.20216	1.07913e-15	1.67774e-12	up	yes
MSTRG.25079	PTPN22, partial [Cervus elaphus hippelaphus];PREDICTED: tyrosine-protein phosphatase non-receptor type 22 isoform X2 [Pantholops hodgsonii]	27032.4	14.7224	3.36486e-15	4.23492e-12	up	yes
MSTRG.29758	PLTP [Cervus elaphus hippelaphus]	11.1515	3.47917	4.23985e-15	4.87214e-12	up	yes
MSTRG.25508	MCOLN3, partial [Cervus elaphus hippelaphus]	62337.6	15.9278	7.68139e-15	8.45913e-12	up	yes
MSTRG.6884	hypothetical protein Celaphus_00001337 [Cervus elaphus hippelaphus]	35.5367	5.15124	1.88917e-14	1.91299e-11	up	yes
MSTRG.19659	SFRP5, partial [Cervus elaphus hippelaphus]	363791	18.4727	1.95425e-14	1.91299e-11	up	yes
gene-Celaphus_00004311	TAT [Cervus elaphus hippelaphus]	22436.7	14.4536	2.57724e-14	2.34884e-11	up	yes
MSTRG.16877	PSTPIP1 [Cervus elaphus hippelaphus]	24.3887	4.60814	4.67917e-14	4.12234e-11	up	yes
MSTRG.9497	PREDICTED: synaptotagmin-like protein 1 isoform X3 [Capra hircus]	85738.2	16.3877	6.86868e-14	5.29071e-11	up	yes
MSTRG.19632	hypothetical protein Celaphus_00008544 [Cervus elaphus hippelaphus];hypothetical protein Celaphus_00008545, partial [Cervus elaphus hippelaphus]	42.3706	5.40499	7.66815e-14	5.47755e-11	up	yes
MSTRG.2983	hypothetical protein Celaphus_00002983, partial [Cervus elaphus hippelaphus]	2404.48	11.2315	9.50123e-14	6.43891e-11	up	yes
gene-Celaphus_00012008	NRCAM, partial [Cervus elaphus hippelaphus]	5132.52	12.3255	2.99197e-13	1.88281e-10	up	yes
MSTRG.32653	MBP [Cervus elaphus hippelaphus]	78.369	6.29221	4.12191e-13	2.42094e-10	up	yes
MSTRG.10571	guanine nucleotide-binding protein subunit alpha-15 isoform X2 [Odocoileus virginianus texanus]	21.3353	4.41517	4.81287e-13	2.70647e-10	up	yes
MSTRG.29762	MMP9 [Cervus elaphus hippelaphus]	42.8954	5.42275	5.92475e-13	3.1447e-10	up	yes
MSTRG.1464	FERMT3, partial [Cervus elaphus hippelaphus]	15.1091	3.91735	5.94911e-13	3.1447e-10	up	yes
MSTRG.6929	hypothetical protein Celaphus_00001361 [Cervus elaphus hippelaphus]	97.0083	6.60004	1.15601e-12	5.76479e-10	up	yes
MSTRG.34964	LECT1, partial [Cervus elaphus hippelaphus]	61.7904	5.94931	1.67817e-12	8.06435e-10	up	yes
MSTRG.23592	claudin-1 [Odocoileus virginianus texanus]	22.3672	4.48331	2.24053e-12	1.05745e-09	up	yes
MSTRG.17009	COCH [Cervus elaphus hippelaphus]	44.361	5.47122	3.5596e-12	1.62207e-09	up	yes
MSTRG.33892	hypothetical protein Celaphus_00018848 [Cervus elaphus hippelaphus]	35.8502	5.16391	4.51133e-12	1.98724e-09	up	yes
MSTRG.25321	FRRS1, partial [Cervus elaphus hippelaphus]	5567.84	12.4429	6.66036e-12	2.7082e-09	up	yes
MSTRG.35111	hypothetical protein Celaphus_00016527 [Cervus elaphus hippelaphus]	11.0955	3.4719	7.47119e-12	2.95276e-09	up	yes
MSTRG.9467	FAM110D, partial [Cervus elaphus hippelaphus]	17.8803	4.1603	7.98146e-12	3.1022e-09	up	yes
MSTRG.25510	MCOLN2, partial [Cervus elaphus hippelaphus]	116.814	6.86807	8.53679e-12	3.26996e-09	up	yes
MSTRG.12332	ITGAD [Cervus elaphus hippelaphus]	26.8941	4.74922	1.16925e-11	4.41474e-09	up	yes
MSTRG.8426	potassium channel subfamily K member 5 [Odocoileus virginianus texanus]	39.2192	5.29349	1.20422e-11	4.48273e-09	up	yes
MSTRG.10232	hypothetical protein Celaphus_00003082 [Cervus elaphus hippelaphus]	6.35244	2.66731	1.27532e-11	4.61734e-09	up	yes
MSTRG.24065	ITGB2 [Cervus elaphus hippelaphus]	11.2188	3.48785	1.39117e-11	4.96874e-09	up	yes
MSTRG.4059	TYRO protein tyrosine kinase-binding protein isoform X1 [Odocoileus virginianus texanus]	11.0275	3.46304	1.89068e-11	6.5751e-09	up	yes
MSTRG.26949	PREDICTED: cysteine-rich secretory protein LCCL domain-containing 1 isoform X1 [Orcinus orca]	22.39	4.48478	2.03534e-11	6.98624e-09	up	yes
MSTRG.155	hypothetical protein Celaphus_00008882, partial [Cervus elaphus hippelaphus]	39.9905	5.32159	2.27186e-11	7.67134e-09	up	yes
MSTRG.7970	hypothetical protein Celaphus_00017414 [Cervus elaphus hippelaphus]	30.177	4.91538	2.29299e-11	7.67134e-09	up	yes
MSTRG.11216	ARHGEF37 [Cervus elaphus hippelaphus]	28.513	4.83355	2.41105e-11	7.86717e-09	up	yes
MSTRG.2320	NCKAP1L, partial [Cervus elaphus hippelaphus]	11.1888	3.48399	2.68786e-11	8.55905e-09	up	yes
MSTRG.5987	hypothetical protein Celaphus_00000679 [Cervus elaphus hippelaphus]	20.5951	4.36423	2.8801e-11	9.06203e-09	up	yes
MSTRG.32000	hypothetical protein Celaphus_00018999 [Cervus elaphus hippelaphus]	214.943	7.74781	2.99757e-11	9.2248e-09	up	yes
MSTRG.8315	HMGA1 [Cervus elaphus hippelaphus]	12.634	3.65924	3.01306e-11	9.2248e-09	up	yes
MSTRG.11267	GPX3 [Cervus elaphus hippelaphus]	109.913	6.78022	4.0658e-11	1.18087e-08	up	yes
MSTRG.45	MMP13, partial [Cervus elaphus hippelaphus]	21.2542	4.40968	4.54751e-11	1.28786e-08	up	yes
MSTRG.32401	MTRF1L, partial [Cervus elaphus hippelaphus]	0.119278	-3.0676	4.58037e-11	1.28786e-08	down	yes
MSTRG.13416	PREDICTED: matrilin-3 isoform X2 [Ovis aries musimon]	10.413	3.38032	4.93288e-11	1.35808e-08	up	yes
MSTRG.17234	IFI27 [Cervus elaphus hippelaphus];IFI27, partial [Cervus elaphus hippelaphus]	8.81035	3.1392	6.83027e-11	1.86107e-08	up	yes
MSTRG.33647	hypothetical protein Celaphus_00018785, partial [Cervus elaphus hippelaphus]	25.2869	4.66032	9.49237e-11	2.43576e-08	up	yes
MSTRG.34202	hypothetical protein Celaphus_00018166, partial [Cervus elaphus hippelaphus];hypothetical protein Celaphus_00018165, partial [Cervus elaphus hippelaphus]	11.385	3.50906	1.25228e-10	3.15216e-08	up	yes
MSTRG.34355	PREDICTED: transmembrane inner ear expressed protein isoform X2 [Ovis aries musimon]	13.7037	3.77649	1.2674e-10	3.16014e-08	up	yes
MSTRG.6399	CD68, partial [Cervus elaphus hippelaphus]	17.4074	4.12163	1.28616e-10	3.17694e-08	up	yes
MSTRG.12249	ITGAL [Cervus elaphus hippelaphus]	17.729	4.14804	1.58987e-10	3.85508e-08	up	yes
MSTRG.801	CAPN5, partial [Cervus elaphus hippelaphus];hypothetical protein Celaphus_00009260 [Cervus elaphus hippelaphus]	32.9111	5.0405	1.65239e-10	3.97024e-08	up	yes
MSTRG.18086	solute carrier family 2, facilitated glucose transporter member 5 isoform X1 [Odocoileus virginianus texanus]	8.87106	3.14911	1.69737e-10	4.04158e-08	up	yes
MSTRG.34023	PRDM1 [Cervus elaphus hippelaphus]	7.27965	2.86387	2.07071e-10	4.88651e-08	up	yes
MSTRG.26695	HAS2, partial [Cervus elaphus hippelaphus]	18.174	4.18381	2.85495e-10	6.67755e-08	up	yes
MSTRG.1656	SLC37A2 [Cervus elaphus hippelaphus]	205.279	7.68144	3.58502e-10	8.02984e-08	up	yes
MSTRG.804	hypothetical protein Celaphus_00009264 [Cervus elaphus hippelaphus]	11.5985	3.53586	3.77761e-10	8.3901e-08	up	yes
MSTRG.16647	ANPEP [Cervus elaphus hippelaphus]	5.0938	2.34874	3.83407e-10	8.44454e-08	up	yes
MSTRG.28026	MGP [Cervus elaphus hippelaphus]	22.5409	4.49447	4.29901e-10	9.28833e-08	up	yes
MSTRG.13896	SULT1C4 [Cervus elaphus hippelaphus]	26.5463	4.73044	4.47297e-10	9.53392e-08	up	yes
MSTRG.2386	GALNT6, partial [Cervus elaphus hippelaphus];GALNT6 [Cervus elaphus hippelaphus]	16.3149	4.02812	4.74756e-10	9.95858e-08	up	yes
MSTRG.755	hypothetical protein Celaphus_00009239 [Cervus elaphus hippelaphus];SLCO2B1, partial [Cervus elaphus hippelaphus]	29.3717	4.87635	6.65495e-10	1.36349e-07	up	yes
MSTRG.888	hypothetical protein Celaphus_00009315, partial [Cervus elaphus hippelaphus]	6.35722	2.6684	8.32742e-10	1.6801e-07	up	yes
MSTRG.4081	SBSN, partial [Cervus elaphus hippelaphus]	27.5616	4.78459	1.07354e-09	2.11743e-07	up	yes
MSTRG.16355	LVRN [Cervus elaphus hippelaphus]	17.9344	4.16466	1.29912e-09	2.54339e-07	up	yes
MSTRG.6236	SLC43A2, partial [Cervus elaphus hippelaphus];PREDICTED: large neutral amino acids transporter small subunit 4 isoform X1 [Bos indicus]	5.71945	2.51588	1.58325e-09	2.9897e-07	up	yes
MSTRG.39284	PHEX, partial [Cervus elaphus hippelaphus]	22.628	4.50004	1.58365e-09	2.9897e-07	up	yes
MSTRG.10387	ACP5 [Cervus elaphus hippelaphus]	1111.72	10.1186	2.04915e-09	3.73511e-07	up	yes
MSTRG.29554	hypothetical protein Celaphus_00007924, partial [Cervus elaphus hippelaphus]	12.2749	3.61764	2.99955e-09	5.28521e-07	up	yes
MSTRG.7913	hypothetical protein Celaphus_00017374 [Cervus elaphus hippelaphus]	8.6645	3.11512	4.28412e-09	7.25829e-07	up	yes
gene-Celaphus_00013470	ST14, partial [Cervus elaphus hippelaphus]	48.0728	5.58715	4.54243e-09	7.6469e-07	up	yes
MSTRG.27000	TNFRSF11B [Cervus elaphus hippelaphus]	0.0571563	-4.12894	5.29452e-09	8.63791e-07	down	yes
MSTRG.18987	V-type immunoglobulin domain-containing suppressor of T-cell activation [Odocoileus virginianus texanus]	5.01581	2.32648	6.00127e-09	9.47832e-07	up	yes
MSTRG.12980	hypothetical protein Celaphus_00005124 [Cervus elaphus hippelaphus]	5.52727	2.46657	6.02481e-09	9.47832e-07	up	yes
MSTRG.26978	TPD52 [Cervus elaphus hippelaphus]	10.0951	3.33559	6.06852e-09	9.49059e-07	up	yes
MSTRG.18446	PTGS2, partial [Cervus elaphus hippelaphus]	6.31723	2.65929	6.37696e-09	9.81339e-07	up	yes
MSTRG.27833	hypothetical protein Celaphus_00013860 [Cervus elaphus hippelaphus]	439.279	8.77899	6.37718e-09	9.81339e-07	up	yes
MSTRG.6959	hypothetical protein Celaphus_00001400 [Cervus elaphus hippelaphus]	7.81764	2.96673	6.38632e-09	9.81339e-07	up	yes
MSTRG.6820	PPP1R1B, partial [Cervus elaphus hippelaphus]	155.357	7.27944	6.77937e-09	1.02976e-06	up	yes
MSTRG.26219	EFHD1, partial [Cervus elaphus hippelaphus]	27.3733	4.7747	6.84692e-09	1.03408e-06	up	yes
MSTRG.5045	MSI1 [Cervus elaphus hippelaphus]	102.991	6.68638	8.09257e-09	1.19226e-06	up	yes
MSTRG.1693	TMEM86A [Cervus elaphus hippelaphus]	5.91542	2.56448	8.25066e-09	1.20478e-06	up	yes
MSTRG.25234	PREDICTED: guanine nucleotide exchange factor VAV3 isoform X1 [Macaca mulatta]	11.9991	3.58486	9.42422e-09	1.36858e-06	up	yes
MSTRG.10349	SLC44A2 [Cervus elaphus hippelaphus]	11.0563	3.46679	9.75404e-09	1.40874e-06	up	yes
MSTRG.10194	hypothetical protein Celaphus_00003049, partial [Cervus elaphus hippelaphus]	12.3054	3.62122	9.93432e-09	1.42239e-06	up	yes
MSTRG.12433	NCF1 [Cervus elaphus hippelaphus]	31.895	4.99526	1.04714e-08	1.48796e-06	up	yes
MSTRG.18018	FBXO2 [Cervus elaphus hippelaphus]	12.1951	3.60822	1.07425e-08	1.51023e-06	up	yes
MSTRG.556	hypothetical protein Celaphus_00009091, partial [Cervus elaphus hippelaphus];signal peptide, CUB and EGF-like domain-containing protein 2 isoform X4 [Bos indicus x Bos taurus]	8.30175	3.05342	1.08438e-08	1.51641e-06	up	yes
MSTRG.8428	KCNK17 [Cervus elaphus hippelaphus]	44.3311	5.47025	1.22176e-08	1.69064e-06	up	yes
MSTRG.16629	MFGE8 [Cervus elaphus hippelaphus]	7.77228	2.95834	1.2687e-08	1.73599e-06	up	yes
MSTRG.25222	PREDICTED: guanine nucleotide exchange factor VAV3 isoform X1 [Bison bison bison]	11.3013	3.49841	1.3359e-08	1.81066e-06	up	yes
MSTRG.12239	hypothetical protein Celaphus_00007070 [Cervus elaphus hippelaphus]	4.51594	2.17503	1.39263e-08	1.87793e-06	up	yes
MSTRG.30792	PTH1R [Cervus elaphus hippelaphus]	8.27933	3.04951	1.53833e-08	2.05344e-06	up	yes
MSTRG.519	hypothetical protein Celaphus_00009078 [Cervus elaphus hippelaphus]	7.90268	2.98234	1.59891e-08	2.11609e-06	up	yes
MSTRG.3522	SLC6A2 [Cervus elaphus hippelaphus]	0.0493558	-4.34064	1.60128e-08	2.11609e-06	down	yes
MSTRG.29326	neuronal acetylcholine receptor subunit alpha-4 isoform X1 [Odocoileus virginianus texanus]	128.402	7.00453	1.64389e-08	2.1509e-06	up	yes
MSTRG.38819	EDA [Cervus elaphus hippelaphus]	5.14789	2.36398	1.76777e-08	2.2903e-06	up	yes
MSTRG.6684	NGFR [Cervus elaphus hippelaphus]	6.90694	2.78805	2.00793e-08	2.56375e-06	up	yes
MSTRG.14237	PREDICTED: glutaminyl-peptide cyclotransferase [Bos indicus]	6.93645	2.7942	2.24505e-08	2.83907e-06	up	yes
MSTRG.11269	TNIP1 [Cervus elaphus hippelaphus]	3.98437	1.99435	2.27441e-08	2.85471e-06	up	yes
MSTRG.23143	RARRES2 [Cervus elaphus hippelaphus]	15.6977	3.97248	2.27901e-08	2.85471e-06	up	yes
MSTRG.11848	ABCA3 [Cervus elaphus hippelaphus]	4.74014	2.24493	2.50202e-08	3.09408e-06	up	yes
MSTRG.1049	SPI1 [Cervus elaphus hippelaphus]	6.3439	2.66537	2.58421e-08	3.16206e-06	up	yes
MSTRG.15367	hypothetical protein Celaphus_00006211 [Cervus elaphus hippelaphus]	147.383	7.20342	2.63082e-08	3.20426e-06	up	yes
MSTRG.2318	PREDICTED: LOW QUALITY PROTEIN: protein phosphatase 1 regulatory subunit 1A [Bos mutus]	117.969	6.88227	2.7238e-08	3.3023e-06	up	yes
MSTRG.23828	UPK1B, partial [Cervus elaphus hippelaphus]	7.83003	2.96902	3.00928e-08	3.61525e-06	up	yes
MSTRG.28306	CYTH4 [Cervus elaphus hippelaphus]	9.92402	3.31092	3.04101e-08	3.62044e-06	up	yes
MSTRG.12439	linker for activation of T-cells family member 2 isoform X1 [Odocoileus virginianus texanus]	10.5309	3.39656	3.24298e-08	3.84358e-06	up	yes
MSTRG.373	SORL1, partial [Cervus elaphus hippelaphus]	11.8338	3.56484	3.46246e-08	4.06724e-06	up	yes
MSTRG.18562	PTPRC [Cervus elaphus hippelaphus]	12.3037	3.62102	3.56704e-08	4.15316e-06	up	yes
MSTRG.520	ADM [Odocoileus virginianus texanus]	16.4833	4.04293	3.70231e-08	4.29175e-06	up	yes
MSTRG.31451	SEPP1, partial [Cervus elaphus hippelaphus]	3.85133	1.94536	3.81059e-08	4.37886e-06	up	yes
MSTRG.21756	PDK4 [Cervus elaphus hippelaphus]	23.8011	4.57295	4.04271e-08	4.60555e-06	up	yes
MSTRG.18385	COLGALT2 [Cervus elaphus hippelaphus]	16.5076	4.04506	4.21896e-08	4.78571e-06	up	yes
MSTRG.27927	PTPN6 [Cervus elaphus hippelaphus]	6.20894	2.63435	4.58155e-08	5.13095e-06	up	yes
MSTRG.16631	ACAN [Cervus elaphus hippelaphus]	7.07611	2.82296	4.85502e-08	5.41427e-06	up	yes
MSTRG.8451	TREM2 [Cervus elaphus hippelaphus]	6.85748	2.77768	5.12801e-08	5.67085e-06	up	yes
MSTRG.24296	PCOLCE2, partial [Cervus elaphus hippelaphus]	6.04304	2.59527	5.47712e-08	5.9328e-06	up	yes
MSTRG.963	CHST1, partial [Cervus elaphus hippelaphus]	6.21966	2.63684	6.20412e-08	6.58533e-06	up	yes
MSTRG.12544	AGFG2 [Cervus elaphus hippelaphus]	4.24988	2.08742	6.30816e-08	6.63496e-06	up	yes
MSTRG.19668	PYROXD2 [Cervus elaphus hippelaphus]	10.6931	3.41861	6.32618e-08	6.63496e-06	up	yes
MSTRG.25121	DENND2D [Cervus elaphus hippelaphus]	12.1576	3.60379	6.45571e-08	6.74405e-06	up	yes
MSTRG.5227	hypothetical protein Celaphus_00000352, partial [Cervus elaphus hippelaphus]	4.66783	2.22275	6.80741e-08	7.08346e-06	up	yes
MSTRG.30972	hypothetical protein Celaphus_00010700 [Cervus elaphus hippelaphus]	9.20148	3.20187	7.01523e-08	7.24268e-06	up	yes
MSTRG.34711	ALDH1A1, partial [Cervus elaphus hippelaphus]	20.795	4.37817	7.09316e-08	7.26637e-06	up	yes
MSTRG.35453	SGCG [Cervus elaphus hippelaphus]	6.40743	2.67975	7.31518e-08	7.43616e-06	up	yes
MSTRG.1089	hypothetical protein Celaphus_00009395 [Cervus elaphus hippelaphus]	5.35033	2.41963	7.87318e-08	7.94229e-06	up	yes
MSTRG.38609	CAPN6 [Cervus elaphus hippelaphus]	14.6822	3.876	7.96051e-08	7.99986e-06	up	yes
MSTRG.35572	endothelin B receptor, partial [Odocoileus virginianus texanus]	8.22074	3.03927	8.06533e-08	8.0745e-06	up	yes
MSTRG.26099	OXCT2 [Cervus elaphus hippelaphus]	3.89396	1.96124	8.43306e-08	8.37916e-06	up	yes
MSTRG.18377	NCF2 [Cervus elaphus hippelaphus]	29.6051	4.88777	8.75682e-08	8.63593e-06	up	yes
MSTRG.26666	MTSS1 [Cervus elaphus hippelaphus]	3.41199	1.77061	8.97294e-08	8.81616e-06	up	yes
MSTRG.6325	hypothetical protein Celaphus_00000907, partial [Cervus elaphus hippelaphus]	7.92176	2.98582	9.35682e-08	9.15929e-06	up	yes
MSTRG.31493	LIFR [Cervus elaphus hippelaphus]	4.61227	2.20548	9.75627e-08	9.51506e-06	up	yes
MSTRG.12945	hypothetical protein Celaphus_00005113 [Cervus elaphus hippelaphus]	5.63001	2.49314	1.18624e-07	1.11973e-05	up	yes
MSTRG.16929	hypothetical protein Celaphus_00015373, partial [Cervus elaphus hippelaphus];SEMA7A [Cervus elaphus hippelaphus]	3.6819	1.88045	1.21885e-07	1.14641e-05	up	yes
MSTRG.29273	RASSF2 [Cervus elaphus hippelaphus]	10.1053	3.33703	1.22662e-07	1.14963e-05	up	yes
MSTRG.3509	hypothetical protein Celaphus_00004125, partial [Cervus elaphus hippelaphus]	4.83829	2.2745	1.26731e-07	1.1673e-05	up	yes
MSTRG.20253	COL27A1 [Cervus elaphus hippelaphus]	5.75193	2.52405	1.27853e-07	1.16925e-05	up	yes
MSTRG.739	CHRDL2 [Cervus elaphus hippelaphus]	52.5425	5.71541	1.31063e-07	1.19448e-05	up	yes
MSTRG.19267	WDFY4, partial [Cervus elaphus hippelaphus]	6.95248	2.79753	1.41388e-07	1.26246e-05	up	yes
MSTRG.18386	COLGALT2, partial [Cervus elaphus hippelaphus]	16.6197	4.05482	1.57076e-07	1.37924e-05	up	yes
MSTRG.24643	ARHGAP30 [Cervus elaphus hippelaphus]	6.70321	2.74485	1.65289e-07	1.42892e-05	up	yes
MSTRG.28552	BTB/POZ domain-containing protein 3, partial [Bos mutus]	4.03201	2.0115	1.65437e-07	1.42892e-05	up	yes
MSTRG.10080	LRRC25 [Cervus elaphus hippelaphus]	17.5326	4.13197	1.70116e-07	1.45979e-05	up	yes
MSTRG.1549	hypothetical protein Celaphus_00013408 [Cervus elaphus hippelaphus];hypothetical protein Celaphus_00013407, partial [Cervus elaphus hippelaphus]	10.9221	3.44918	1.72418e-07	1.47476e-05	up	yes
MSTRG.27827	B4GALNT3 [Cervus elaphus hippelaphus]	6.0313	2.59247	1.73755e-07	1.48067e-05	up	yes
MSTRG.30790	hypothetical protein Celaphus_00010605 [Cervus elaphus hippelaphus]	8.78345	3.13479	1.74229e-07	1.48067e-05	up	yes
MSTRG.6646	chondroadherin isoform X1 [Homo sapiens]	24.6539	4.62374	1.82522e-07	1.54617e-05	up	yes
MSTRG.296	IL10RA [Cervus elaphus hippelaphus]	4.31549	2.10952	1.92454e-07	1.61993e-05	up	yes
MSTRG.15931	hypothetical protein Celaphus_00006432 [Cervus elaphus hippelaphus]	4.1578	2.05582	1.93924e-07	1.62712e-05	up	yes
MSTRG.19708	hypothetical protein Celaphus_00008602 [Cervus elaphus hippelaphus]	6.4107	2.68048	2.0031e-07	1.66484e-05	up	yes
MSTRG.9464	zinc transporter 2 isoform X1 [Odocoileus virginianus texanus]	30.4686	4.92925	2.13781e-07	1.7602e-05	up	yes
MSTRG.38801	FOXO4 [Cervus elaphus hippelaphus]	4.08038	2.0287	2.19882e-07	1.79817e-05	up	yes
MSTRG.7835	ras-GEF domain-containing family member 1B isoform X1 [Odocoileus virginianus texanus]	12.6481	3.66085	2.26669e-07	1.83768e-05	up	yes
MSTRG.24047	hypothetical protein Celaphus_00012855, partial [Cervus elaphus hippelaphus]	5.188	2.37518	2.31786e-07	1.86204e-05	up	yes
MSTRG.955	Tumor protein p53-inducible protein 11 [Myotis brandtii]	3.75205	1.90768	2.35316e-07	1.88467e-05	up	yes
gene-Celaphus_00012862	hypothetical protein Celaphus_00012862 [Cervus elaphus hippelaphus]	78.4563	6.29382	2.38148e-07	1.9013e-05	up	yes
MSTRG.8260	BMP5 [Cervus elaphus hippelaphus]	8.9269	3.15816	2.39551e-07	1.9013e-05	up	yes
MSTRG.20718	PTK2B, partial [Cervus elaphus hippelaphus]	11.0211	3.4622	2.55348e-07	2.02062e-05	up	yes
MSTRG.6376	SLC2A4 [Cervus elaphus hippelaphus]	4.3865	2.13307	2.59296e-07	2.03937e-05	up	yes
MSTRG.24300	PCOLCE2 [Cervus elaphus hippelaphus]	6.72557	2.74966	2.6979e-07	2.10341e-05	up	yes
MSTRG.33788	hypothetical protein Celaphus_00018830 [Cervus elaphus hippelaphus]	8.42074	3.07395	2.76713e-07	2.15104e-05	up	yes
MSTRG.28626	hypothetical protein Celaphus_00007440 [Cervus elaphus hippelaphus]	6.61128	2.72493	2.8811e-07	2.22654e-05	up	yes
MSTRG.9036	PHACTR1, partial [Cervus elaphus hippelaphus]	6.69727	2.74357	2.93047e-07	2.25809e-05	up	yes
MSTRG.29336	PREDICTED: transcription factor-like 5 protein isoform X2 [Ovis aries musimon]	20.6137	4.36553	2.96166e-07	2.27548e-05	up	yes
MSTRG.9958	RASGEF1C [Cervus elaphus hippelaphus]	27.258	4.76861	2.98853e-07	2.28948e-05	up	yes
MSTRG.13969	EFEMP1, partial [Cervus elaphus hippelaphus]	0.0567383	-4.13953	3.07765e-07	2.32717e-05	down	yes
MSTRG.682	STARD10 [Cervus elaphus hippelaphus];STARD10, partial [Cervus elaphus hippelaphus]	5.53531	2.46866	3.08176e-07	2.32717e-05	up	yes
MSTRG.23092	WDR86, partial [Cervus elaphus hippelaphus]	3.50979	1.81139	3.09706e-07	2.33206e-05	up	yes
MSTRG.24950	TXNIP [Cervus elaphus hippelaphus]	6.3143	2.65862	3.13138e-07	2.34837e-05	up	yes
MSTRG.36000	hypothetical protein Celaphus_00019435 [Cervus elaphus hippelaphus]	7.08086	2.82392	3.16087e-07	2.35329e-05	up	yes
MSTRG.23639	apolipoprotein D [Cervus elaphus]	10.1999	3.35049	3.27535e-07	2.43167e-05	up	yes
MSTRG.36002	hypothetical protein Celaphus_00019436 [Cervus elaphus hippelaphus]	7.87731	2.9777	3.32347e-07	2.45361e-05	up	yes
MSTRG.9403	NCMAP [Cervus elaphus hippelaphus]	27.8713	4.80071	3.53754e-07	2.58995e-05	up	yes
MSTRG.16798	MTMR10 [Cervus elaphus hippelaphus]	9.91048	3.30895	3.64359e-07	2.66022e-05	up	yes
MSTRG.25153	CSF1 [Cervus elaphus hippelaphus]	5.39627	2.43196	3.67083e-07	2.67273e-05	up	yes
gene-Celaphus_00014148	PREDICTED: GTP-binding protein Rhes [Vicugna pacos]	12.5499	3.6496	3.69146e-07	2.67302e-05	up	yes
MSTRG.5253	hypothetical protein Celaphus_00000368, partial [Cervus elaphus hippelaphus]	4.28965	2.10086	3.96221e-07	2.84569e-05	up	yes
MSTRG.27976	PREDICTED: gamma-aminobutyric acid receptor-associated protein-like 1 [Camelus dromedarius]	5.37716	2.42684	3.97521e-07	2.84728e-05	up	yes
MSTRG.21349	SPP1, partial [Cervus elaphus hippelaphus]	14.0067	3.80804	4.10709e-07	2.91802e-05	up	yes
MSTRG.17997	TNFRSF1B, partial [Cervus elaphus hippelaphus]	4.73822	2.24435	4.15823e-07	2.94643e-05	up	yes
MSTRG.29738	MATN4 [Cervus elaphus hippelaphus]	32.5151	5.02304	4.2292e-07	2.97281e-05	up	yes
MSTRG.22528	PREDICTED: cyclic AMP-responsive element-binding protein 5 isoform X2 [Camelus bactrianus];hypothetical protein Celaphus_00012090, partial [Cervus elaphus hippelaphus]	0.152936	-2.709	4.37037e-07	3.04773e-05	down	yes
MSTRG.31446	NIM1K, partial [Cervus elaphus hippelaphus]	13.6451	3.77031	4.41855e-07	3.05412e-05	up	yes
MSTRG.1090	hypothetical protein Celaphus_00009396 [Cervus elaphus hippelaphus]	4.80103	2.26334	4.42421e-07	3.05412e-05	up	yes
MSTRG.31995	ENPP1, partial [Cervus elaphus hippelaphus]	9.26107	3.21118	4.43453e-07	3.05412e-05	up	yes
MSTRG.20502	SEMA4D, partial [Cervus elaphus hippelaphus];hypothetical protein Celaphus_00016991 [Cervus elaphus hippelaphus]	3.96445	1.98712	4.44887e-07	3.05412e-05	up	yes
MSTRG.16104	hypothetical protein Celaphus_00006571 [Cervus elaphus hippelaphus]	3.30663	1.72536	4.76861e-07	3.2567e-05	up	yes
MSTRG.27586	hypothetical protein Celaphus_00013708, partial [Cervus elaphus hippelaphus];hypothetical protein Celaphus_00013707, partial [Cervus elaphus hippelaphus]	61.8526	5.95076	4.9551e-07	3.36667e-05	up	yes
MSTRG.20683	hypothetical protein Celaphus_00017085 [Cervus elaphus hippelaphus]	3.26052	1.7051	5.41759e-07	3.63419e-05	up	yes
MSTRG.20973	Inactive ubiquitin carboxyl-terminal hydrolase 53 [Tupaia chinensis]	9.8197	3.29568	5.43866e-07	3.63493e-05	up	yes
MSTRG.18947	PREDICTED: collagen alpha-1(XIII) chain isoform X16 [Panthera pardus]	5.7826	2.53172	5.81735e-07	3.8497e-05	up	yes
MSTRG.25519	PREDICTED: afadin- and alpha-actinin-binding protein [Pantholops hodgsonii]	0.12239	-3.03045	6.01204e-07	3.93313e-05	down	yes
MSTRG.2779	CYP27B1 [Cervus elaphus hippelaphus]	6.14245	2.61882	6.40499e-07	4.16955e-05	up	yes
MSTRG.35387	SLC46A3 [Cervus elaphus hippelaphus]	16.1714	4.01537	6.5114e-07	4.21805e-05	up	yes
MSTRG.12227	hypothetical protein Celaphus_00007060 [Cervus elaphus hippelaphus]	12.0761	3.59409	6.75203e-07	4.36323e-05	up	yes
MSTRG.9243	CAMK2N1 [Cervus elaphus hippelaphus]	6.73851	2.75243	6.87512e-07	4.42202e-05	up	yes
MSTRG.10240	hypothetical protein Celaphus_00003088 [Cervus elaphus hippelaphus]	4.11704	2.04161	7.08169e-07	4.52099e-05	up	yes
MSTRG.21221	SLC9B2, partial [Cervus elaphus hippelaphus]	9.25503	3.21024	7.13025e-07	4.54102e-05	up	yes
MSTRG.18274	hypothetical protein Celaphus_00011141, partial [Cervus elaphus hippelaphus];hypothetical protein Celaphus_00011142 [Cervus elaphus hippelaphus]	6.00498	2.58616	7.26608e-07	4.59432e-05	up	yes
MSTRG.15353	LYSMD2 [Cervus elaphus hippelaphus]	1050.94	10.0375	7.49994e-07	4.71033e-05	up	yes
MSTRG.24078	ABCG1 [Cervus elaphus hippelaphus]	3.58585	1.84232	7.64712e-07	4.77809e-05	up	yes
MSTRG.21106	hypothetical protein Celaphus_00018537, partial [Cervus elaphus hippelaphus]	8.96769	3.16474	7.88024e-07	4.90058e-05	up	yes
MSTRG.9625	hypothetical protein Celaphus_00014923 [Cervus elaphus hippelaphus]	2.85027	1.5111	8.29597e-07	5.12295e-05	up	yes
MSTRG.6644	ACSF2 [Cervus elaphus hippelaphus]	4.04018	2.01442	9.10291e-07	5.55635e-05	up	yes
MSTRG.27753	hypothetical protein Celaphus_00013835, partial [Cervus elaphus hippelaphus];adenosine deaminase CECR1 [Odocoileus virginianus texanus];hypothetical protein Celaphus_00013834, partial [Cervus elaphus hippelaphus]	14.2772	3.83564	9.16149e-07	5.5664e-05	up	yes
MSTRG.13883	hypothetical protein Celaphus_00005562 [Cervus elaphus hippelaphus]	6.04303	2.59527	9.2965e-07	5.63547e-05	up	yes
MSTRG.10068	COMP [Cervus elaphus hippelaphus]	38.2225	5.25635	9.34543e-07	5.65217e-05	up	yes
MSTRG.11849	hypothetical protein Celaphus_00006803 [Cervus elaphus hippelaphus]	4.16077	2.05685	9.64697e-07	5.79476e-05	up	yes
MSTRG.28391	TIMP3 [Cervus elaphus hippelaphus]	7.25995	2.85996	9.70659e-07	5.81735e-05	up	yes
MSTRG.19830	PREDICTED: disintegrin and metalloproteinase domain-containing protein 8-like isoform X1 [Ovis aries musimon]	7.88752	2.97957	9.82374e-07	5.86961e-05	up	yes
MSTRG.9092	F13A1 [Cervus elaphus hippelaphus]	51.3882	5.68336	9.84466e-07	5.86961e-05	up	yes
MSTRG.19172	KCNMA1 [Cervus elaphus hippelaphus]	4.72014	2.23883	9.86042e-07	5.86961e-05	up	yes
MSTRG.20381	hypothetical protein Celaphus_00016946 [Cervus elaphus hippelaphus]	4.50999	2.17312	9.91226e-07	5.88722e-05	up	yes
MSTRG.9281	PREDICTED: alkaline phosphatase, tissue-nonspecific isozyme isoform X1 [Equus przewalskii]	3.48694	1.80196	1.00511e-06	5.93849e-05	up	yes
MSTRG.25516	hypothetical protein Celaphus_00002386 [Cervus elaphus hippelaphus];hypothetical protein Celaphus_00002385 [Cervus elaphus hippelaphus]	0.102902	-3.28066	1.01219e-06	5.9582e-05	down	yes
MSTRG.20752	hypothetical protein Celaphus_00017124, partial [Cervus elaphus hippelaphus]	17.2813	4.11114	1.05316e-06	6.18554e-05	up	yes
MSTRG.15971	SLC7A7 [Cervus elaphus hippelaphus]	3.78295	1.91951	1.09575e-06	6.37258e-05	up	yes
MSTRG.10998	hypothetical protein Celaphus_00003591, partial [Cervus elaphus hippelaphus];transcription factor 7 isoform X3 [Odocoileus virginianus texanus]	0.111679	-3.16257	1.09706e-06	6.37258e-05	down	yes
MSTRG.16637	hypothetical protein Celaphus_00015197 [Cervus elaphus hippelaphus]	5.39279	2.43103	1.15878e-06	6.65796e-05	up	yes
MSTRG.39269	SAT1 [Cervus elaphus hippelaphus]	5.38403	2.42869	1.17788e-06	6.75302e-05	up	yes
MSTRG.26745	hypothetical protein Celaphus_00016261, partial [Cervus elaphus hippelaphus];LYN [Cervus elaphus hippelaphus]	3.33791	1.73895	1.20171e-06	6.87474e-05	up	yes
MSTRG.4425	NKG7 [Cervus elaphus hippelaphus]	6.12105	2.61378	1.24171e-06	7.05774e-05	up	yes
MSTRG.2663	hypothetical protein Celaphus_00011613, partial [Cervus elaphus hippelaphus];hypothetical protein Celaphus_00011612 [Cervus elaphus hippelaphus]	4.16425	2.05806	1.24653e-06	7.06993e-05	up	yes
MSTRG.12321	hypothetical protein Celaphus_00007131 [Cervus elaphus hippelaphus]	28.4366	4.82968	1.26078e-06	7.13545e-05	up	yes
MSTRG.5178	hypothetical protein Celaphus_00000323 [Cervus elaphus hippelaphus]	3.9434	1.97944	1.31182e-06	7.40843e-05	up	yes
MSTRG.12331	hypothetical protein Celaphus_00007136 [Cervus elaphus hippelaphus]	7.90671	2.98308	1.31902e-06	7.4332e-05	up	yes
MSTRG.7463	hypothetical protein Celaphus_00001695 [Cervus elaphus hippelaphus]	3.43138	1.77879	1.35036e-06	7.59361e-05	up	yes
MSTRG.12748	LOW QUALITY PROTEIN: G-protein coupled estrogen receptor 1 [Odocoileus virginianus texanus]	3.55696	1.83065	1.35676e-06	7.61338e-05	up	yes
MSTRG.18063	hypothetical protein Celaphus_00010975 [Cervus elaphus hippelaphus]	6.82499	2.77083	1.38538e-06	7.75753e-05	up	yes
MSTRG.5670	hypothetical protein Celaphus_00000555 [Cervus elaphus hippelaphus];hypothetical protein Celaphus_00000556 [Cervus elaphus hippelaphus]	9.90519	3.30819	1.39339e-06	7.78588e-05	up	yes
MSTRG.4886	PREDICTED: kremen protein 1 [Bos mutus]	0.136179	-2.87642	1.40282e-06	7.82203e-05	down	yes
MSTRG.29768	OCSTAMP [Cervus elaphus hippelaphus]	43.0299	5.42727	1.47333e-06	8.18068e-05	up	yes
MSTRG.26749	SDR16C5, partial [Cervus elaphus hippelaphus]	7.53087	2.91282	1.52309e-06	8.42158e-05	up	yes
MSTRG.1789	hypothetical protein Celaphus_00013574 [Cervus elaphus hippelaphus]	3.64892	1.86747	1.53004e-06	8.42478e-05	up	yes
MSTRG.18655	FAM89A [Cervus elaphus hippelaphus]	5.35427	2.42069	1.56409e-06	8.59437e-05	up	yes
MSTRG.10188	hypothetical protein Celaphus_00003048, partial [Cervus elaphus hippelaphus];hypothetical protein Celaphus_00003041 [Cervus elaphus hippelaphus];hypothetical protein Celaphus_00003050, partial [Cervus elaphus hippelaphus];hypothetical protein Celaphus_00003047 [Cervus elaphus hippelaphus]	9.88069	3.30461	1.59324e-06	8.72428e-05	up	yes
MSTRG.6299	hypothetical protein Celaphus_00000883 [Cervus elaphus hippelaphus]	4.05584	2.02	1.59764e-06	8.72428e-05	up	yes
MSTRG.23666	hypothetical protein Celaphus_00012635, partial [Cervus elaphus hippelaphus];hypothetical protein Celaphus_00012634, partial [Cervus elaphus hippelaphus]	24.7727	4.63068	1.68273e-06	9.15115e-05	up	yes
MSTRG.2971	CHPT1 [Cervus elaphus hippelaphus]	5.58999	2.48285	1.72478e-06	9.34136e-05	up	yes
gene-Celaphus_00015092	UNC80, partial [Cervus elaphus hippelaphus]	6126.54	12.5809	1.79637e-06	9.67326e-05	up	yes
MSTRG.30788	MYL3 [Cervus elaphus hippelaphus]	10.7218	3.42248	1.79704e-06	9.67326e-05	up	yes
MSTRG.2332	CALCOCO1 [Cervus elaphus hippelaphus]	3.20354	1.67967	1.80351e-06	9.68836e-05	up	yes
MSTRG.25138	CD53 [Cervus elaphus hippelaphus]	6.01228	2.58791	1.81031e-06	9.70519e-05	up	yes
MSTRG.29740	syndecan-4 [Odocoileus virginianus texanus]	5.16988	2.37013	1.83812e-06	9.83432e-05	up	yes
MSTRG.27578	PARVG [Cervus elaphus hippelaphus]	6.90334	2.78729	1.84783e-06	9.84638e-05	up	yes
MSTRG.10844	DOK3, partial [Cervus elaphus hippelaphus]	16.7806	4.06872	1.94937e-06	0.000103044	up	yes
MSTRG.11114	CD14 [Cervus elaphus hippelaphus]	3.29448	1.72005	2.00109e-06	0.000104807	up	yes
MSTRG.33116	PSTPIP2 [Cervus elaphus hippelaphus]	6.88476	2.78341	2.00256e-06	0.000104807	up	yes
MSTRG.10442	VAV1 [Cervus elaphus hippelaphus]	6.49857	2.70012	2.02864e-06	0.000105963	up	yes
MSTRG.19666	LOXL4 [Cervus elaphus hippelaphus]	9.29911	3.21709	2.0589e-06	0.000106997	up	yes
MSTRG.10391	hypothetical protein Celaphus_00003219 [Cervus elaphus hippelaphus]	3.41388	1.77141	2.13782e-06	0.000109997	up	yes
MSTRG.23477	KLHL24, partial [Cervus elaphus hippelaphus]	4.03952	2.01418	2.14597e-06	0.000109997	up	yes
MSTRG.12327	ITGAM, partial [Cervus elaphus hippelaphus]	4.577	2.1944	2.17972e-06	0.000111216	up	yes
MSTRG.25170	hypothetical protein Celaphus_00002235 [Cervus elaphus hippelaphus]	3.42776	1.77727	2.19627e-06	0.000111845	up	yes
MSTRG.15599	hypothetical protein Celaphus_00006263, partial [Cervus elaphus hippelaphus]	14.7741	3.885	2.24952e-06	0.000114117	up	yes
MSTRG.29316	zinc finger and BTB domain-containing protein 46 isoform X2 [Bos indicus x Bos taurus]	3.09871	1.63167	2.25584e-06	0.000114218	up	yes
MSTRG.28316	NCF4 [Cervus elaphus hippelaphus]	4.99745	2.32119	2.26295e-06	0.000114274	up	yes
MSTRG.4342	FCGRT, partial [Cervus elaphus hippelaphus]	3.46984	1.79487	2.26559e-06	0.000114274	up	yes
MSTRG.36591	hypothetical protein Celaphus_00019246, partial [Cervus elaphus hippelaphus]	97.0942	6.60131	2.41448e-06	0.000120861	up	yes
MSTRG.18240	PDPN [Cervus elaphus hippelaphus]	5.48439	2.45533	2.42498e-06	0.000120929	up	yes
MSTRG.17092	NFKBIA [Cervus elaphus hippelaphus]	3.37732	1.75588	2.44615e-06	0.000121755	up	yes
MSTRG.23664	hypothetical protein Celaphus_00012632 [Cervus elaphus hippelaphus]	8.54976	3.09588	2.50283e-06	0.000124342	up	yes
MSTRG.8404	RNF8, partial [Cervus elaphus hippelaphus]	4.85777	2.28029	2.57431e-06	0.000127176	up	yes
MSTRG.8951	MBOAT1, partial [Cervus elaphus hippelaphus]	5.88796	2.55777	2.66279e-06	0.000131057	up	yes
MSTRG.20249	hypothetical protein Celaphus_00016903 [Cervus elaphus hippelaphus]	4.64585	2.21594	2.69095e-06	0.000132197	up	yes
MSTRG.13966	EGF-containing fibulin-like extracellular matrix protein 1 [Odocoileus virginianus texanus]	0.0507643	-4.30004	2.7395e-06	0.000134083	down	yes
MSTRG.26402	hypothetical protein Celaphus_00016080 [Cervus elaphus hippelaphus]	4.76022	2.25103	2.76136e-06	0.000134899	up	yes
MSTRG.19667	LOXL4 [Cervus elaphus hippelaphus]	8.08027	3.0144	2.76637e-06	0.000134899	up	yes
MSTRG.33471	hypothetical protein Celaphus_00018732, partial [Cervus elaphus hippelaphus];hypothetical protein Celaphus_00018733 [Cervus elaphus hippelaphus]	24.3535	4.60606	2.8187e-06	0.000136945	up	yes
MSTRG.10153	TMEM38A [Cervus elaphus hippelaphus]	6.46517	2.69269	2.95652e-06	0.000142854	up	yes
MSTRG.31993	CTGF [Cervus elaphus hippelaphus]	3.64059	1.86417	3.03875e-06	0.000145761	up	yes
MSTRG.9678	ITM2C [Cervus elaphus hippelaphus]	3.62523	1.85807	3.13081e-06	0.00014879	up	yes
MSTRG.25947	hypothetical protein Celaphus_00002608, partial [Cervus elaphus hippelaphus]	4.18047	2.06367	3.36938e-06	0.000158457	up	yes
MSTRG.21107	hypothetical protein Celaphus_00018538, partial [Cervus elaphus hippelaphus]	7.96878	2.99436	3.38288e-06	0.000158527	up	yes
MSTRG.15940	PLCB2 [Cervus elaphus hippelaphus]	5.76633	2.52765	3.56743e-06	0.000166585	up	yes
MSTRG.10390	hypothetical protein Celaphus_00003218 [Cervus elaphus hippelaphus]	3.08418	1.62489	3.72833e-06	0.000173068	up	yes
MSTRG.13566	GALNT14 [Cervus elaphus hippelaphus]	5.5973	2.48473	3.73246e-06	0.000173068	up	yes
MSTRG.10115	hypothetical protein Celaphus_00002992 [Cervus elaphus hippelaphus]	3.46564	1.79312	3.9957e-06	0.000183344	up	yes
MSTRG.729	UCP2 [Cervus elaphus hippelaphus]	5.52178	2.46513	4.19011e-06	0.00019061	up	yes
MSTRG.25107	WNT2B [Cervus elaphus hippelaphus]	5.30293	2.40679	4.34137e-06	0.000196517	up	yes
MSTRG.9568	MATN1, partial [Cervus elaphus hippelaphus]	26.4678	4.72616	4.38433e-06	0.000197423	up	yes
MSTRG.23474	hypothetical protein Celaphus_00012534 [Cervus elaphus hippelaphus]	6.23443	2.64026	4.38468e-06	0.000197423	up	yes
MSTRG.5852	PREDICTED: septin-4 isoform X1 [Pantholops hodgsonii]	2.81474	1.493	4.50777e-06	0.000202619	up	yes
MSTRG.38396	ARHGAP4 [Cervus elaphus hippelaphus]	4.49369	2.1679	4.7461e-06	0.000212609	up	yes
MSTRG.22061	CD36 [Cervus elaphus hippelaphus]	18.3269	4.19589	4.76938e-06	0.000213291	up	yes
MSTRG.10036	CILP2 [Cervus elaphus hippelaphus]	4.77295	2.25488	4.898e-06	0.000218304	up	yes
MSTRG.2498	VDR [Cervus elaphus hippelaphus]	4.63591	2.21285	5.02816e-06	0.000222977	up	yes
MSTRG.35259	serine/threonine-protein kinase DCLK1 isoform 2 [Rattus norvegicus]	0.143539	-2.80049	5.05361e-06	0.00022373	down	yes
MSTRG.29894	hypothetical protein Celaphus_00008084 [Cervus elaphus hippelaphus]	7.0513	2.81789	5.06703e-06	0.000223949	up	yes
gene-Celaphus_00004985	hypothetical protein Celaphus_00004985 [Cervus elaphus hippelaphus]	0.0473983	-4.39902	5.13636e-06	0.000226243	down	yes
MSTRG.2302	hypothetical protein Celaphus_00011377 [Cervus elaphus hippelaphus]	5.0913	2.34804	5.1446e-06	0.000226243	up	yes
MSTRG.34030	hypothetical protein Celaphus_00018905, partial [Cervus elaphus hippelaphus]	0.140966	-2.82658	5.33743e-06	0.000233557	down	yes
MSTRG.20748	dedicator of cytokinesis protein 5 [Odocoileus virginianus texanus]	11.6602	3.54352	5.42523e-06	0.000237006	up	yes
MSTRG.7388	hypothetical protein Celaphus_00001664 [Cervus elaphus hippelaphus]	19.4407	4.28101	5.52461e-06	0.000240157	up	yes
MSTRG.17581	NUAK2, partial [Cervus elaphus hippelaphus]	5.28389	2.4016	5.92952e-06	0.00025524	up	yes
MSTRG.21170	SGMS2 [Cervus elaphus hippelaphus]	4.29613	2.10304	6.08681e-06	0.00026116	up	yes
MSTRG.7306	hypothetical protein Celaphus_00001599 [Cervus elaphus hippelaphus]	2.86083	1.51644	6.20625e-06	0.000265423	up	yes
MSTRG.23726	kalirin-like isoform X4 [Odocoileus virginianus texanus]	3.40372	1.76711	6.38561e-06	0.000272414	up	yes
MSTRG.25263	COL11A1, partial [Cervus elaphus hippelaphus]	4.86857	2.2835	6.39034e-06	0.000272414	up	yes
MSTRG.38387	BGN [Cervus elaphus hippelaphus]	3.40725	1.76861	6.86504e-06	0.000289845	up	yes
MSTRG.36701	MSR1, partial [Cervus elaphus hippelaphus]	6.39932	2.67792	6.9831e-06	0.000293891	up	yes
MSTRG.26946	peptidase inhibitor 15 precursor [Bos taurus]	0.107481	-3.21785	7.03887e-06	0.000295767	down	yes
MSTRG.35735	G-protein coupled receptor 183 [Odocoileus virginianus texanus]	6.87988	2.78238	7.16047e-06	0.000300175	up	yes
MSTRG.24674	CD1E, partial [Cervus elaphus hippelaphus]	11.368	3.50691	7.16649e-06	0.000300175	up	yes
MSTRG.19905	AFAP1L2, partial [Cervus elaphus hippelaphus]	3.64694	1.86669	7.18008e-06	0.000300268	up	yes
MSTRG.38043	hypothetical protein Celaphus_00009454, partial [Cervus elaphus hippelaphus]	5.73473	2.51973	7.19877e-06	0.000300574	up	yes
MSTRG.1266	TCIRG1 [Cervus elaphus hippelaphus]	3.4228	1.77518	7.21409e-06	0.000300739	up	yes
MSTRG.28832	hypothetical protein Celaphus_00007509, partial [Cervus elaphus hippelaphus]	12.2442	3.61403	7.40513e-06	0.000306767	up	yes
MSTRG.12369	ASL, partial [Cervus elaphus hippelaphus]	5.99971	2.58489	7.54691e-06	0.000312151	up	yes
MSTRG.10683	FBN2, partial [Cervus elaphus hippelaphus]	0.148112	-2.75524	7.67993e-06	0.000316404	down	yes
MSTRG.17584	hypothetical protein Celaphus_00010739, partial [Cervus elaphus hippelaphus]	4.6273	2.21017	7.81974e-06	0.000320428	up	yes
MSTRG.16819	hypothetical protein Celaphus_00015296, partial [Cervus elaphus hippelaphus]	4.49523	2.16839	7.86753e-06	0.000321887	up	yes
MSTRG.26208	hypothetical protein Celaphus_00002782, partial [Cervus elaphus hippelaphus]	38.5307	5.26794	8.00707e-06	0.000326082	up	yes
MSTRG.30204	ENTPD3 [Cervus elaphus hippelaphus]	11.9581	3.57992	8.11535e-06	0.000329184	up	yes
MSTRG.38290	PREDICTED: phosphatase and actin regulator 4 [Lipotes vexillifer]	5.69117	2.50872	8.13201e-06	0.000329184	up	yes
MSTRG.2503	PREDICTED: heme transporter HRG1 [Pantholops hodgsonii]	4.10088	2.03593	8.14554e-06	0.000329184	up	yes
MSTRG.16493	hypothetical protein Celaphus_00015148 [Cervus elaphus hippelaphus];hypothetical protein Celaphus_00015149 [Cervus elaphus hippelaphus]	3.12976	1.64605	8.51787e-06	0.00034162	up	yes
MSTRG.7197	neuronal pentraxin-1 precursor [Bos taurus]	10.8704	3.44233	8.5573e-06	0.000342681	up	yes
MSTRG.18994	testican-2 [Odocoileus virginianus texanus]	2.96732	1.56916	8.70124e-06	0.000347393	up	yes
MSTRG.6302	SLC13A5 [Cervus elaphus hippelaphus]	3.87606	1.95459	8.90697e-06	0.000353026	up	yes
MSTRG.29153	hypothetical protein Celaphus_00007638 [Cervus elaphus hippelaphus];hypothetical protein Celaphus_00007634, partial [Cervus elaphus hippelaphus]	4.08224	2.02936	9.10635e-06	0.000360163	up	yes
MSTRG.18090	ERRFI1 [Cervus elaphus hippelaphus]	3.04876	1.60822	9.11651e-06	0.000360163	up	yes
MSTRG.11483	HAPLN1 [Cervus elaphus hippelaphus]	7.36789	2.88125	9.24611e-06	0.000363653	up	yes
MSTRG.21351	IBSP [Cervus elaphus hippelaphus]	36.8729	5.20449	9.32399e-06	0.000366171	up	yes
MSTRG.12085	Homolog of rat B/K protein product, partial [Homo sapiens];SYT17 [Cervus elaphus hippelaphus]	3.79518	1.92417	9.35033e-06	0.00036666	up	yes
MSTRG.26181	hypothetical protein Celaphus_00002756 [Cervus elaphus hippelaphus]	3.68269	1.88076	9.58677e-06	0.000374266	up	yes
MSTRG.21111	hypothetical protein Celaphus_00018543 [Cervus elaphus hippelaphus]	7.60872	2.92765	9.63172e-06	0.000375466	up	yes
MSTRG.25273	COL11A1, partial [Cervus elaphus hippelaphus]	3.97554	1.99115	1.01005e-05	0.000390781	up	yes
MSTRG.19206	ANXA11 [Cervus elaphus hippelaphus]	3.46358	1.79226	1.0107e-05	0.000390781	up	yes
MSTRG.1319	CTSF [Cervus elaphus hippelaphus]	2.94536	1.55844	1.02199e-05	0.000394324	up	yes
MSTRG.29322	PREDICTED: LOW QUALITY PROTEIN: pancreatic progenitor cell differentiation and proliferation factor [Capra hircus]	2.74736	1.45804	1.0564e-05	0.000405822	up	yes
MSTRG.38536	PLP1 [Cervus elaphus hippelaphus]	0.125844	-2.99029	1.06021e-05	0.000406695	down	yes
MSTRG.2491	collagen alpha-1(II) chain isoform X2 [Odocoileus virginianus texanus]	25.2693	4.65931	1.06912e-05	0.000408195	up	yes
MSTRG.28058	microsomal glutathione S-transferase 1 [Odocoileus virginianus texanus]	0.125415	-2.99522	1.07959e-05	0.000410555	down	yes
MSTRG.8139	OCIAD2 [Cervus elaphus hippelaphus]	3.47263	1.79603	1.09044e-05	0.000414086	up	yes
MSTRG.26674	FBXO32 [Cervus elaphus hippelaphus];FBXO32, partial [Cervus elaphus hippelaphus]	5.11938	2.35597	1.09445e-05	0.00041501	up	yes
MSTRG.10676	FBN2, partial [Cervus elaphus hippelaphus]	0.154229	-2.69685	1.10951e-05	0.00042012	down	yes
MSTRG.36694	calcium uptake protein 3, mitochondrial isoform X4 [Loxodonta africana]	5.1845	2.37421	1.20104e-05	0.000450548	up	yes
MSTRG.10684	FBN2, partial [Cervus elaphus hippelaphus];FBN2 [Cervus elaphus hippelaphus]	0.148992	-2.74669	1.2018e-05	0.000450548	down	yes
MSTRG.18839	hypothetical protein Celaphus_00008193, partial [Cervus elaphus hippelaphus];ANK3, partial [Cervus elaphus hippelaphus];hypothetical protein Celaphus_00008191, partial [Cervus elaphus hippelaphus];hypothetical protein Celaphus_00008192, partial [Cervus elaphus hippelaphus];ankyrin-3 isoform X15 [Zalophus californianus]	7.12669	2.83323	1.20992e-05	0.00045295	up	yes
MSTRG.29552	matrix metalloproteinase-24 [Odocoileus virginianus texanus]	28.7112	4.84354	1.21954e-05	0.000455903	up	yes
MSTRG.2224	DUSP6, partial [Cervus elaphus hippelaphus];dual specificity protein phosphatase 6 isoform X1 [Heterocephalus glaber]	2.62027	1.38972	1.2645e-05	0.000470716	up	yes
MSTRG.3929	GMFG [Cervus elaphus hippelaphus]	3.34803	1.74331	1.27179e-05	0.000472763	up	yes
MSTRG.20594	PTCH1, partial [Cervus elaphus hippelaphus];hypothetical protein Celaphus_00017038, partial [Cervus elaphus hippelaphus]	3.00919	1.58937	1.31358e-05	0.00048559	up	yes
MSTRG.28301	hypothetical protein Celaphus_00014111 [Cervus elaphus hippelaphus]	3.19221	1.67456	1.31365e-05	0.00048559	up	yes
MSTRG.8458	MDFI, partial [Cervus elaphus hippelaphus]	3.44603	1.78493	1.32191e-05	0.000487963	up	yes
MSTRG.34637	VLDLR, partial [Cervus elaphus hippelaphus]	2.67427	1.41914	1.3316e-05	0.000490665	up	yes
MSTRG.9513	IFI6 [Cervus elaphus hippelaphus]	4.04326	2.01552	1.44832e-05	0.00052474	up	yes
MSTRG.9076	DSP, partial [Cervus elaphus hippelaphus]	4.98635	2.31798	1.44934e-05	0.00052474	up	yes
MSTRG.12233	nuclear protein 1 [Odocoileus virginianus texanus]	3.438	1.78157	1.50984e-05	0.000542623	up	yes
MSTRG.34291	SCARA5 [Cervus elaphus hippelaphus]	5.96643	2.57687	1.51105e-05	0.000542623	up	yes
MSTRG.12076	hypothetical protein Celaphus_00006957 [Cervus elaphus hippelaphus]	4.63232	2.21174	1.51615e-05	0.000543714	up	yes
MSTRG.1246	CPT1A [Cervus elaphus hippelaphus]	3.81891	1.93316	1.52665e-05	0.000546251	up	yes
MSTRG.20745	Dedicator of cytokinesis protein 5, partial [Bos mutus]	13.3323	3.73686	1.58712e-05	0.000564843	up	yes
MSTRG.9212	hypothetical protein Celaphus_00014692 [Cervus elaphus hippelaphus]	10.2432	3.35659	1.67439e-05	0.000590055	up	yes
MSTRG.16780	hypothetical protein Celaphus_00015273, partial [Cervus elaphus hippelaphus]	2.72025	1.44374	1.68919e-05	0.000592114	up	yes
MSTRG.1174	cathepsin D [Odocoileus virginianus texanus]	2.92462	1.54825	1.70442e-05	0.000595872	up	yes
MSTRG.18992	CHST3 [Cervus elaphus hippelaphus]	3.66538	1.87396	1.82537e-05	0.000632301	up	yes
MSTRG.24443	RARRES1 [Cervus elaphus hippelaphus]	3.14476	1.65295	1.83854e-05	0.000636028	up	yes
MSTRG.6286	ATP2A3, partial [Cervus elaphus hippelaphus]	3.09496	1.62992	1.85842e-05	0.000642066	up	yes
MSTRG.19491	hypothetical protein Celaphus_00008460 [Cervus elaphus hippelaphus]	9.92016	3.31036	1.88122e-05	0.000648248	up	yes
MSTRG.38230	STK26 [Cervus elaphus hippelaphus]	4.24778	2.08671	2.0765e-05	0.000704517	up	yes
MSTRG.13855	hypothetical protein Celaphus_00005544 [Cervus elaphus hippelaphus]	4.38713	2.13328	2.07947e-05	0.000704621	up	yes
MSTRG.18966	ADAMTS14 [Cervus elaphus hippelaphus]	0.158089	-2.66119	2.08426e-05	0.000705339	down	yes
MSTRG.25123	adenosine receptor A3 isoform X4 [Odocoileus virginianus texanus]	18.4331	4.20423	2.13642e-05	0.000718391	up	yes
MSTRG.26078	MFSD2A [Cervus elaphus hippelaphus]	0.0845243	-3.56449	2.14191e-05	0.000719324	down	yes
MSTRG.9463	EXTL1, partial [Cervus elaphus hippelaphus]	7.67946	2.94101	2.16666e-05	0.000725118	up	yes
MSTRG.30584	CACNA1D [Cervus elaphus hippelaphus]	0.147396	-2.76223	2.1748e-05	0.000726675	down	yes
MSTRG.19656	PREDICTED: arginine vasopressin-induced protein 1 isoform X2 [Bison bison bison]	3.08162	1.62369	2.19415e-05	0.000729172	up	yes
MSTRG.35359	mesenteric estrogen-dependent adipogenesis protein [Odocoileus virginianus texanus]	0.119573	-3.06404	2.19642e-05	0.000729172	down	yes
MSTRG.662	FOLR2 [Cervus elaphus hippelaphus];FOLR1 [Cervus elaphus hippelaphus]	3.21342	1.68411	2.21066e-05	0.000731758	up	yes
MSTRG.26070	TPA: collagen, type IX, alpha 2 [Bos taurus]	20.9506	4.38892	2.21216e-05	0.000731758	up	yes
MSTRG.14996	hypothetical protein Celaphus_00006037 [Cervus elaphus hippelaphus]	0.172049	-2.53911	2.27134e-05	0.000745311	down	yes
MSTRG.12989	hypothetical protein Celaphus_00005128 [Cervus elaphus hippelaphus]	3.25052	1.70067	2.27287e-05	0.000745311	up	yes
MSTRG.7326	TRIM47 [Cervus elaphus hippelaphus]	4.44669	2.15273	2.29419e-05	0.000751368	up	yes
MSTRG.8619	TNFRSF21 [Cervus elaphus hippelaphus]	2.83012	1.50086	2.35497e-05	0.000766524	up	yes
MSTRG.15354	hypothetical protein Celaphus_00006202, partial [Cervus elaphus hippelaphus];tropomodulin-2 [Bos taurus]	11.124	3.47561	2.36537e-05	0.000768962	up	yes
MSTRG.35991	hypothetical protein Celaphus_00019432 [Cervus elaphus hippelaphus]	2.8357	1.50371	2.42436e-05	0.000784283	up	yes
MSTRG.33189	TPA: myosin-Vb-like [Bos taurus];hypothetical protein Celaphus_00017785 [Cervus elaphus hippelaphus];hypothetical protein Celaphus_00017786 [Cervus elaphus hippelaphus]	4.93427	2.30284	2.4414e-05	0.000788829	up	yes
MSTRG.4142	intermediate conductance calcium-activated potassium channel protein 4 [Enhydra lutris kenyoni]	3.43561	1.78057	2.50925e-05	0.000807788	up	yes
MSTRG.26596	hypothetical protein Celaphus_00016200 [Cervus elaphus hippelaphus]	0.202986	-2.30055	2.58779e-05	0.000831047	down	yes
MSTRG.24095	MX1 [Cervus elaphus hippelaphus]	5.14287	2.36257	2.65736e-05	0.000849262	up	yes
MSTRG.11034	hypothetical protein Celaphus_00003615 [Cervus elaphus hippelaphus]	0.115869	-3.10943	2.73176e-05	0.000868837	down	yes
MSTRG.10384	PREDICTED: calponin-1 [Camelus ferus]	0.0802664	-3.63906	2.77139e-05	0.000878129	down	yes
MSTRG.10430	MYO1F [Cervus elaphus hippelaphus]	3.41485	1.77182	2.78091e-05	0.000878129	up	yes
MSTRG.13616	ARHGAP25, partial [Cervus elaphus hippelaphus]	3.55693	1.83063	2.80187e-05	0.000882973	up	yes
MSTRG.24736	BGLAP [Cervus elaphus hippelaphus]	10.9828	3.45718	2.82522e-05	0.000884873	up	yes
MSTRG.12832	hypothetical protein Celaphus_00005027 [Cervus elaphus hippelaphus]	2.85831	1.51516	2.8257e-05	0.000884873	up	yes
MSTRG.25964	hypothetical protein Celaphus_00002614 [Cervus elaphus hippelaphus]	2.45622	1.29644	2.86952e-05	0.000897531	up	yes
MSTRG.38094	LONRF3 [Cervus elaphus hippelaphus];hypothetical protein Celaphus_00009464 [Cervus elaphus hippelaphus]	3.38247	1.75808	2.8918e-05	0.000902365	up	yes
MSTRG.19198	hypothetical protein Celaphus_00008333 [Cervus elaphus hippelaphus];hypothetical protein Celaphus_00008332, partial [Cervus elaphus hippelaphus]	2.5988	1.37784	2.91976e-05	0.000908941	up	yes
MSTRG.7307	phosphoribosyl pyrophosphate synthase-associated protein 1 isoform X1 [Odocoileus virginianus texanus]	3.29892	1.72199	2.92556e-05	0.000909678	up	yes
MSTRG.37425	TPA: LAG1 homolog, ceramide synthase 6 [Bos taurus]	0.222532	-2.16791	2.93083e-05	0.000910244	down	yes
MSTRG.29388	cathepsin Z [Odocoileus virginianus texanus]	2.77712	1.47359	2.99569e-05	0.00092712	up	yes
MSTRG.25945	hypothetical protein Celaphus_00002611 [Cervus elaphus hippelaphus]	9.38726	3.2307	3.00045e-05	0.000927508	up	yes
MSTRG.6835	NR1D1 [Cervus elaphus hippelaphus]	3.61747	1.85498	3.08318e-05	0.00094975	up	yes
MSTRG.14276	CRIM1, partial [Cervus elaphus hippelaphus]	3.1896	1.67338	3.32183e-05	0.00101498	up	yes
MSTRG.21937	hypothetical protein Celaphus_00011916 [Cervus elaphus hippelaphus]	2.89496	1.53354	3.3577e-05	0.00102476	up	yes
MSTRG.27180	hypothetical protein Celaphus_00016383 [Cervus elaphus hippelaphus]	8.69789	3.12066	3.4133e-05	0.00103933	up	yes
MSTRG.2207	PREDICTED: neurotensin/neuromedin N [Bison bison bison]	0.0754571	-3.7282	3.44437e-05	0.00104398	down	yes
MSTRG.10432	MYO1F [Cervus elaphus hippelaphus]	5.15965	2.36727	3.54678e-05	0.00107378	up	yes
MSTRG.17596	hypothetical protein Celaphus_00010744, partial [Cervus elaphus hippelaphus]	3.3743	1.75459	3.60021e-05	0.00108499	up	yes
MSTRG.8410	MDGA1, partial [Cervus elaphus hippelaphus]	2.95136	1.56138	3.62486e-05	0.00109073	up	yes
MSTRG.250	ZBTB16 [Cervus elaphus hippelaphus]	12.7076	3.66761	3.75162e-05	0.00112095	up	yes
MSTRG.3384	hypothetical protein Celaphus_00004046 [Cervus elaphus hippelaphus];hypothetical protein Celaphus_00004045 [Cervus elaphus hippelaphus]	2.65438	1.40838	3.75345e-05	0.00112095	up	yes
MSTRG.24885	tumor necrosis factor alpha-induced protein 8-like protein 2 [Odocoileus virginianus texanus]	6.55352	2.71227	3.76646e-05	0.00112356	up	yes
MSTRG.11239	hypothetical protein Celaphus_00003751 [Cervus elaphus hippelaphus]	5.10686	2.35244	3.82026e-05	0.00113527	up	yes
MSTRG.19904	actin filament-associated protein 1-like 2 [Bos taurus]	3.50576	1.80973	4.04759e-05	0.00119129	up	yes
MSTRG.28372	HMOX1 [Cervus elaphus hippelaphus]	3.84643	1.94352	4.05323e-05	0.00119162	up	yes
MSTRG.756	ARRB1 [Cervus elaphus hippelaphus]	2.48932	1.31575	4.13982e-05	0.00121438	up	yes
MSTRG.12431	hypothetical protein Celaphus_00007167 [Cervus elaphus hippelaphus]	3.27607	1.71197	4.19169e-05	0.00122609	up	yes
MSTRG.28208	BHLHE41 [Cervus elaphus hippelaphus]	0.203657	-2.29578	4.23201e-05	0.00123321	down	yes
MSTRG.6546	MFAP4 [Cervus elaphus hippelaphus]	3.54451	1.82559	4.28193e-05	0.00124438	up	yes
gene-Celaphus_00000136	LIF [Cervus elaphus hippelaphus]	7.40464	2.88843	4.36076e-05	0.00126238	up	yes
MSTRG.17040	AKAP6 [Cervus elaphus hippelaphus]	6.01482	2.58852	4.50187e-05	0.0012919	up	yes
MSTRG.10144	hypothetical protein Celaphus_00003015, partial [Cervus elaphus hippelaphus]	6.6184	2.72648	4.62609e-05	0.00132181	up	yes
MSTRG.3883	EGLN2 [Cervus elaphus hippelaphus];Ras-related protein Rab-4B [Tupaia chinensis]	2.73797	1.45311	4.66289e-05	0.00132802	up	yes
MSTRG.15200	Protein pellino-like protein 2, partial [Bos mutus]	2.92444	1.54816	4.72551e-05	0.0013444	up	yes
MSTRG.32502	solute carrier family 22 member 3 [Bos taurus];hypothetical protein Celaphus_00019152, partial [Cervus elaphus hippelaphus]	0.159711	-2.64646	4.75323e-05	0.00135057	down	yes
MSTRG.12548	hypothetical protein Celaphus_00007257 [Cervus elaphus hippelaphus]	3.46688	1.79364	4.79422e-05	0.00135956	up	yes
MSTRG.11136	hypothetical protein Celaphus_00003694 [Cervus elaphus hippelaphus]	2.37508	1.24798	4.80577e-05	0.00136138	up	yes
MSTRG.3600	PREDICTED: protein BEAN1 [Pantholops hodgsonii]	2.70355	1.43486	4.84169e-05	0.00136988	up	yes
MSTRG.23554	BCL6 [Cervus elaphus hippelaphus]	3.58636	1.84252	4.84615e-05	0.00136988	up	yes
MSTRG.23690	TNK2 [Cervus elaphus hippelaphus]	2.3709	1.24543	5.03498e-05	0.00140969	up	yes
MSTRG.31095	hypothetical protein Celaphus_00017889 [Cervus elaphus hippelaphus]	3.42943	1.77797	5.27171e-05	0.00146356	up	yes
MSTRG.3825	RHPN2, partial [Cervus elaphus hippelaphus]	8.99616	3.16931	5.31134e-05	0.00147302	up	yes
MSTRG.21247	serine/threonine-protein phosphatase 2B catalytic subunit alpha isoform [Oryctolagus cuniculus];serine/threonine-protein phosphatase 2B catalytic subunit alpha isoform isoform X1 [Felis catus]	2.99714	1.58359	5.4555e-05	0.00150668	up	yes
MSTRG.9697	PID1 [Cervus elaphus hippelaphus]	3.73442	1.90089	5.50413e-05	0.00151694	up	yes
MSTRG.10141	hypothetical protein Celaphus_00003013, partial [Cervus elaphus hippelaphus]	3.53376	1.8212	5.57032e-05	0.00153358	up	yes
MSTRG.30728	PRKAR2A [Cervus elaphus hippelaphus]	5.46726	2.45082	5.67411e-05	0.00155567	up	yes
MSTRG.17284	hypothetical protein Celaphus_00015529, partial [Cervus elaphus hippelaphus]	0.124312	-3.00796	5.70661e-05	0.00156134	down	yes
MSTRG.36429	CD200 [Cervus elaphus hippelaphus]	2.59178	1.37394	5.81674e-05	0.00158655	up	yes
MSTRG.2449	PRPH [Cervus elaphus hippelaphus]	0.0542986	-4.20294	5.84257e-05	0.00159031	down	yes
MSTRG.37118	LIMS2 [Cervus elaphus hippelaphus]	2.95511	1.56321	5.86438e-05	0.0015946	up	yes
MSTRG.10331	intercellular adhesion molecule 1 [Odocoileus virginianus texanus]	2.99629	1.58318	5.89115e-05	0.00160013	up	yes
MSTRG.28559	hypothetical protein Celaphus_00007422, partial [Cervus elaphus hippelaphus]	6.20696	2.63389	5.91568e-05	0.00160062	up	yes
MSTRG.3316	coactosin-like protein [Bos taurus]	2.36154	1.23973	5.92641e-05	0.00160062	up	yes
MSTRG.5019	TRPV4 [Cervus elaphus hippelaphus]	3.15806	1.65904	5.9279e-05	0.00160062	up	yes
MSTRG.28716	APBB1IP [Cervus elaphus hippelaphus]	3.13036	1.64633	6.00376e-05	0.00161918	up	yes
MSTRG.7552	hypothetical protein Celaphus_00017227, partial [Cervus elaphus hippelaphus]	2.91891	1.54543	6.1206e-05	0.00164398	up	yes
MSTRG.31959	ARHGAP18, partial [Cervus elaphus hippelaphus]	2.73708	1.45264	6.18421e-05	0.0016577	up	yes
MSTRG.7550	PREDICTED: uncharacterized protein LOC105078493 [Camelus bactrianus]	2.71625	1.44161	6.35832e-05	0.0016992	up	yes
MSTRG.30371	hypothetical protein Celaphus_00010360, partial [Cervus elaphus hippelaphus]	0.198403	-2.3335	6.49434e-05	0.00171825	down	yes
MSTRG.6540	serine/threonine-protein kinase ULK2 [Bos taurus]	2.63722	1.39902	6.51507e-05	0.0017217	up	yes
MSTRG.1243	carnitine O-palmitoyltransferase 1, liver isoform [Eptesicus fuscus]	4.38513	2.13262	6.52764e-05	0.00172181	up	yes
MSTRG.9479	PREDICTED: ribosomal protein S6 kinase alpha-1 isoform X1 [Bos mutus];RPS6KA1, partial [Cervus elaphus hippelaphus]	2.91911	1.54553	6.57261e-05	0.0017285	up	yes
MSTRG.22588	hypothetical protein Celaphus_00012122 [Cervus elaphus hippelaphus]	154.867	7.27488	6.60958e-05	0.00173649	up	yes
MSTRG.6782	hypothetical protein Celaphus_00001232, partial [Cervus elaphus hippelaphus]	2.89163	1.53188	6.70288e-05	0.00175577	up	yes
MSTRG.26048	hypothetical protein Celaphus_00002679 [Cervus elaphus hippelaphus];hypothetical protein Celaphus_00002680 [Cervus elaphus hippelaphus]	2.79567	1.48319	6.75194e-05	0.00176512	up	yes
MSTRG.34709	AN1-type zinc finger protein 5 isoform X1 [Odocoileus virginianus texanus]	3.75817	1.91003	6.92332e-05	0.00179925	up	yes
MSTRG.10124	hypothetical protein Celaphus_00002997 [Cervus elaphus hippelaphus]	9.27877	3.21393	6.97533e-05	0.00180921	up	yes
MSTRG.22299	TES, partial [Cervus elaphus hippelaphus]	3.12318	1.64302	7.03076e-05	0.00182179	up	yes
MSTRG.33668	unnamed protein product [Homo sapiens]	3.20581	1.68069	7.12486e-05	0.00184076	up	yes
MSTRG.28283	hypothetical protein Celaphus_00014097, partial [Cervus elaphus hippelaphus]	3.72307	1.89649	7.20753e-05	0.0018603	up	yes
MSTRG.2548	hypothetical protein Celaphus_00011573 [Cervus elaphus hippelaphus]	8.92059	3.15714	7.29305e-05	0.00187871	up	yes
MSTRG.33687	cAMP-dependent protein kinase inhibitor beta, partial [Bos mutus]	4.09679	2.0345	7.31979e-05	0.00188193	up	yes
MSTRG.14841	unnamed protein product, partial [Gulo gulo]	2.49517	1.31914	7.62565e-05	0.00195107	up	yes
MSTRG.9319	PREDICTED: protein Wnt-4 isoform X1 [Bison bison bison]	8.88189	3.15087	7.71891e-05	0.00197303	up	yes
MSTRG.28028	ARHGDIB, partial [Cervus elaphus hippelaphus]	2.7037	1.43494	7.77228e-05	0.00198092	up	yes
MSTRG.23651	NRROS, partial [Cervus elaphus hippelaphus]	2.98873	1.57953	7.78125e-05	0.0019813	up	yes
MSTRG.6529	TRPV2 [Cervus elaphus hippelaphus]	2.70884	1.43768	7.84204e-05	0.00199101	up	yes
MSTRG.30872	metalloproteinase inhibitor 4 [Odocoileus virginianus texanus]	4.30271	2.10525	7.85706e-05	0.00199101	up	yes
MSTRG.24840	protein S100-A5 isoform X1 [Pongo abelii]	3.51089	1.81184	7.93299e-05	0.00200832	up	yes
MSTRG.176	hypothetical protein Celaphus_00008888, partial [Cervus elaphus hippelaphus]	2.94061	1.55611	8.12918e-05	0.00205209	up	yes
MSTRG.35439	hypothetical protein Celaphus_00016644 [Cervus elaphus hippelaphus]	2.20223	1.13897	8.17339e-05	0.00205932	up	yes
MSTRG.27878	G1/S-specific cyclin-D2 [Bos taurus]	0.144998	-2.7859	8.28859e-05	0.00208239	down	yes
MSTRG.29527	hypothetical protein Celaphus_00007911 [Cervus elaphus hippelaphus];hypothetical protein Celaphus_00007910 [Cervus elaphus hippelaphus]	2.54688	1.34873	8.43597e-05	0.00211139	up	yes
MSTRG.38906	CFP [Cervus elaphus hippelaphus]	7.86465	2.97538	8.49979e-05	0.00212399	up	yes
MSTRG.30886	SLC6A6 [Cervus elaphus hippelaphus]	2.85423	1.5131	8.50239e-05	0.00212399	up	yes
MSTRG.10224	PKN1 [Cervus elaphus hippelaphus];PKN1, partial [Cervus elaphus hippelaphus]	2.26762	1.18118	8.51745e-05	0.00212401	up	yes
MSTRG.4821	TCN2 [Cervus elaphus hippelaphus]	2.54911	1.34999	8.60438e-05	0.00214339	up	yes
MSTRG.20829	DOK2 [Cervus elaphus hippelaphus]	3.78005	1.9184	8.82831e-05	0.00219237	up	yes
MSTRG.34661	dedicator of cytokinesis protein 8-like [Odocoileus virginianus texanus];DOCK8, partial [Cervus elaphus hippelaphus];dedicator of cytokinesis protein 8 isoform X2 [Lagenorhynchus obliquidens]	2.55483	1.35323	9.07124e-05	0.00224278	up	yes
MSTRG.24293	PLS1, partial [Cervus elaphus hippelaphus]	4.34806	2.12037	9.08161e-05	0.00224324	up	yes
MSTRG.36330	TMEM45A, partial [Cervus elaphus hippelaphus]	2.75228	1.46063	9.23e-05	0.00226508	up	yes
MSTRG.24994	PHGDH [Cervus elaphus hippelaphus]	0.165229	-2.59746	9.36778e-05	0.0022925	down	yes
MSTRG.31009	PREDICTED: dedicator of cytokinesis protein 2 [Vicugna pacos]	9.48071	3.245	9.38206e-05	0.00229387	up	yes
MSTRG.9456	PAQR7 [Cervus elaphus hippelaphus]	3.03481	1.60161	9.47299e-05	0.00231306	up	yes
MSTRG.6142	UNC119 [Cervus elaphus hippelaphus]	2.62016	1.38966	9.72009e-05	0.00236776	up	yes
MSTRG.33727	hypothetical protein Celaphus_00018814 [Cervus elaphus hippelaphus]	2.99115	1.5807	0.000100826	0.00243809	up	yes
MSTRG.38351	hypothetical protein Celaphus_00009613 [Cervus elaphus hippelaphus]	0.256335	-1.9639	0.000101773	0.00245631	down	yes
MSTRG.17656	hypothetical protein Celaphus_00010800 [Cervus elaphus hippelaphus]	14.2952	3.83746	0.000101859	0.00245631	up	yes
MSTRG.14073	EPAS1 [Cervus elaphus hippelaphus]	4.05744	2.02057	0.000103312	0.00248006	up	yes
MSTRG.16891	chondroitin sulfate proteoglycan 4 [Odocoileus virginianus texanus]	2.49085	1.31664	0.000104906	0.00251591	up	yes
MSTRG.6968	hypothetical protein Celaphus_00001405 [Cervus elaphus hippelaphus]	2.33781	1.22516	0.000107546	0.00256711	up	yes
MSTRG.2465	RND1 [Cervus elaphus hippelaphus]	5.36746	2.42424	0.000107724	0.00256731	up	yes
MSTRG.17148	hypothetical protein Celaphus_00015445 [Cervus elaphus hippelaphus]	3.39821	1.76478	0.000108252	0.00257758	up	yes
MSTRG.32402	RGS17, partial [Cervus elaphus hippelaphus];RGS17 [Cervus elaphus hippelaphus]	0.27353	-1.87023	0.000110133	0.00261061	down	yes
MSTRG.24776	ephrin-A4 isoform X1 [Bos indicus x Bos taurus]	2.76521	1.46739	0.000111726	0.00264599	up	yes
MSTRG.25846	oxysterol-binding protein-related protein 9 [Bos taurus]	3.16504	1.66222	0.000113256	0.00267474	up	yes
MSTRG.5093	hypothetical protein Celaphus_00000276 [Cervus elaphus hippelaphus]	3.57177	1.83664	0.000113565	0.00267739	up	yes
MSTRG.18335	QSOX1 [Cervus elaphus hippelaphus]	2.27706	1.18717	0.000115652	0.00271706	up	yes
MSTRG.27694	hypothetical protein Celaphus_00013790 [Cervus elaphus hippelaphus]	0.186002	-2.42661	0.00011608	0.00272468	down	yes
MSTRG.3311	hypothetical protein Celaphus_00004005 [Cervus elaphus hippelaphus]	2.20591	1.14138	0.000116271	0.00272674	up	yes
MSTRG.18011	AGTRAP, partial [Cervus elaphus hippelaphus]	2.46577	1.30204	0.000116519	0.00273014	up	yes
MSTRG.22618	TPA: Temporarily Assigned Gene name family member (tag-163)-like [Bos taurus]	2.35072	1.2331	0.000117308	0.0027401	up	yes
MSTRG.19168	KCNMA1 [Cervus elaphus hippelaphus]	3.87243	1.95324	0.000117359	0.0027401	up	yes
MSTRG.14151	HAAO [Cervus elaphus hippelaphus]	9.67991	3.27499	0.000120022	0.00278995	up	yes
MSTRG.24911	cathepsin K [Bubalus bubalis];ARNT [Cervus elaphus hippelaphus]	3.29511	1.72032	0.00012035	0.00279022	up	yes
MSTRG.25012	PREDICTED: T-box transcription factor TBX15 [Bos mutus];TBX15, partial [Cervus elaphus hippelaphus]	0.225795	-2.14692	0.000120583	0.00279317	down	yes
MSTRG.22713	WNT16 [Cervus elaphus hippelaphus]	0.213793	-2.22571	0.000122252	0.00282934	down	yes
MSTRG.8602	ENPP5 [Cervus elaphus hippelaphus]	8.59896	3.10416	0.000123599	0.00285303	up	yes
MSTRG.3292	hypothetical protein Celaphus_00003988 [Cervus elaphus hippelaphus];hypothetical protein Celaphus_00003987 [Cervus elaphus hippelaphus];hypothetical protein Celaphus_00003986 [Cervus elaphus hippelaphus]	2.21625	1.14812	0.0001247	0.00287092	up	yes
MSTRG.21963	TMEM196, partial [Cervus elaphus hippelaphus]	10.0443	3.32831	0.000124995	0.00287521	up	yes
MSTRG.18714	B3GALNT2 [Cervus elaphus hippelaphus]	0.228325	-2.13084	0.000127441	0.00291625	down	yes
MSTRG.31406	integrin alpha-2 [Odocoileus virginianus texanus];ITGA2, partial [Cervus elaphus hippelaphus]	2.58521	1.37028	0.000127837	0.00292279	up	yes
MSTRG.30789	hypothetical protein Celaphus_00010608 [Cervus elaphus hippelaphus]	3.51305	1.81272	0.000129721	0.00295753	up	yes
MSTRG.18127	hypothetical protein Celaphus_00011006 [Cervus elaphus hippelaphus]	4.12129	2.0431	0.0001305	0.00297081	up	yes
MSTRG.24778	ADAM15 [Cervus elaphus hippelaphus]	2.70199	1.43402	0.000132855	0.00301664	up	yes
MSTRG.17613	DYRK3 [Cervus elaphus hippelaphus]	2.35265	1.23429	0.000133699	0.00302799	up	yes
MSTRG.4749	YPEL1, partial [Cervus elaphus hippelaphus]	2.2577	1.17485	0.000133937	0.00303077	up	yes
MSTRG.24077	hypothetical protein Celaphus_00012880 [Cervus elaphus hippelaphus]	0.197498	-2.34009	0.000134777	0.00304457	down	yes
MSTRG.13645	hypothetical protein Celaphus_00005462 [Cervus elaphus hippelaphus]	4.73316	2.2428	0.000140942	0.00316759	up	yes
MSTRG.22807	hypothetical protein Celaphus_00012253 [Cervus elaphus hippelaphus]	4.3294	2.11417	0.000141909	0.00318391	up	yes
MSTRG.22119	GSAP [Cervus elaphus hippelaphus]	4.1737	2.06133	0.000142053	0.00318444	up	yes
MSTRG.33655	RSPO3, partial [Cervus elaphus hippelaphus]	2.47322	1.30639	0.000143679	0.00321761	up	yes
MSTRG.6511	PMP22 [Cervus elaphus hippelaphus]	3.12492	1.64382	0.000144385	0.00322579	up	yes
MSTRG.8298	PREDICTED: proteasome subunit beta type-8 isoform X1 [Macaca mulatta]	2.32437	1.21684	0.000144658	0.00322893	up	yes
MSTRG.30617	STAB1 [Cervus elaphus hippelaphus]	2.53903	1.34428	0.00014477	0.00322893	up	yes
MSTRG.20382	hypothetical protein Celaphus_00016948, partial [Cervus elaphus hippelaphus]	4.34371	2.11893	0.000145884	0.00325102	up	yes
MSTRG.35139	integral membrane protein 2B [Odocoileus virginianus texanus]	2.65326	1.40776	0.000146485	0.00325893	up	yes
MSTRG.6030	MYO1D [Cervus elaphus hippelaphus]	2.38493	1.25395	0.000148317	0.00329413	up	yes
MSTRG.23152	SSPO [Cervus elaphus hippelaphus]	5.62516	2.49189	0.000148636	0.00329689	up	yes
MSTRG.12888	SURF4 [Cervus elaphus hippelaphus]	0.224871	-2.15283	0.000149444	0.00330804	down	yes
MSTRG.20974	SYNPO2, partial [Cervus elaphus hippelaphus]	5.23804	2.38903	0.000149777	0.00330809	up	yes
MSTRG.25785	TTC22 [Cervus elaphus hippelaphus]	23.0928	4.52937	0.000150564	0.00331617	up	yes
gene-Celaphus_00010721	hypothetical protein Celaphus_00010721 [Cervus elaphus hippelaphus]	0.116355	-3.1034	0.00015119	0.00332719	down	yes
MSTRG.35905	hypothetical protein Celaphus_00016861, partial [Cervus elaphus hippelaphus]	2.43667	1.28491	0.000153589	0.00336785	up	yes
MSTRG.9954	GFPT2 [Cervus elaphus hippelaphus]	5.37524	2.42633	0.000153616	0.00336785	up	yes
MSTRG.37620	hypothetical protein Celaphus_00015880, partial [Cervus elaphus hippelaphus]	3.86346	1.94989	0.000156122	0.00340543	up	yes
MSTRG.30188	EXOG [Cervus elaphus hippelaphus]	0.200405	-2.31901	0.000156189	0.00340543	down	yes
MSTRG.32370	hypothetical protein Celaphus_00019092 [Cervus elaphus hippelaphus]	0.222564	-2.16771	0.000156292	0.00340543	down	yes
MSTRG.18061	CTNNBIP1 [Cervus elaphus hippelaphus]	2.93088	1.55133	0.000159754	0.00346896	up	yes
MSTRG.3050	TCP11L2 [Cervus elaphus hippelaphus]	2.7095	1.43803	0.000161131	0.00349074	up	yes
MSTRG.34297	CLU, partial [Cervus elaphus hippelaphus]	2.4776	1.30894	0.000162825	0.00352166	up	yes
MSTRG.24181	TPA: EPH receptor B1 [Bos taurus];hypothetical protein Celaphus_00012955 [Cervus elaphus hippelaphus]	2.74518	1.4569	0.000164288	0.0035504	up	yes
MSTRG.31013	hypothetical protein Celaphus_00017867 [Cervus elaphus hippelaphus]	10.2892	3.36305	0.000165958	0.00357771	up	yes
MSTRG.16824	hypothetical protein Celaphus_00015297, partial [Cervus elaphus hippelaphus]	4.48255	2.16432	0.000167299	0.00360075	up	yes
MSTRG.34655	hypothetical protein Celaphus_00018345 [Cervus elaphus hippelaphus]	4.33847	2.11719	0.000167757	0.00360588	up	yes
MSTRG.14286	hypothetical protein Celaphus_00005719, partial [Cervus elaphus hippelaphus]	0.22982	-2.12142	0.000167811	0.00360588	down	yes
MSTRG.28032	PREDICTED: ras-related and estrogen-regulated growth inhibitor isoform X2 [Pantholops hodgsonii]	0.258287	-1.95295	0.000168673	0.00362146	down	yes
MSTRG.7212	SGSH [Cervus elaphus hippelaphus]	2.26765	1.1812	0.000170897	0.0036603	up	yes
MSTRG.34663	hypothetical protein Celaphus_00018346, partial [Cervus elaphus hippelaphus]	2.604	1.38073	0.000173094	0.00370436	up	yes
MSTRG.38927	hypothetical protein Celaphus_00009922, partial [Cervus elaphus hippelaphus]	8.8606	3.1474	0.000176192	0.00375544	up	yes
MSTRG.34427	endophilin-A1 [Bos taurus]	0.126635	-2.98125	0.000176496	0.00375889	down	yes
MSTRG.27427	CHMP4C, partial [Cervus elaphus hippelaphus]	3.51988	1.81553	0.000178208	0.00379177	up	yes
MSTRG.35932	MRPS6 [Cervus elaphus hippelaphus];SLC5A3 [Cervus elaphus hippelaphus]	3.86755	1.95142	0.000179254	0.00380155	up	yes
MSTRG.12930	potassium channel subfamily T member 1 isoform X11 [Bubalus bubalis]	3.92193	1.97156	0.000184017	0.00389086	up	yes
MSTRG.3339	IRF8, partial [Cervus elaphus hippelaphus]	6.5879	2.71982	0.000184277	0.00389324	up	yes
MSTRG.908	LDLRAD3 [Cervus elaphus hippelaphus]	2.58685	1.3712	0.000186226	0.00391876	up	yes
MSTRG.25847	oxysterol-binding protein-related protein 9, partial [Odocoileus virginianus texanus]	2.94651	1.55901	0.000187307	0.00393837	up	yes
MSTRG.27892	CD9, partial [Cervus elaphus hippelaphus]	2.09959	1.07011	0.000187772	0.00394187	up	yes
MSTRG.21891	SCIN [Cervus elaphus hippelaphus]	12.979	3.69811	0.000188844	0.00395392	up	yes
MSTRG.14792	TMEM63C [Cervus elaphus hippelaphus]	0.13912	-2.84559	0.000190055	0.00397401	down	yes
MSTRG.16088	hypothetical protein Celaphus_00006563, partial [Cervus elaphus hippelaphus]	2.1801	1.12439	0.000190211	0.00397414	up	yes
MSTRG.13293	RSAD2 [Cervus elaphus hippelaphus]	3.62964	1.85983	0.000190997	0.0039866	up	yes
MSTRG.22512	secernin-1 [Odocoileus virginianus texanus]	2.68007	1.42227	0.000195345	0.00405676	up	yes
MSTRG.26853	SGK3, partial [Cervus elaphus hippelaphus]	3.22001	1.68706	0.000195736	0.00405749	up	yes
MSTRG.30408	hypothetical protein Celaphus_00010371 [Cervus elaphus hippelaphus]	2.56127	1.35686	0.000196519	0.00407054	up	yes
MSTRG.17219	hypothetical protein Celaphus_00015488 [Cervus elaphus hippelaphus]	2.15035	1.10457	0.000197865	0.00409247	up	yes
MSTRG.15392	Putative protein KIAA1370, partial [Bos mutus];protein FAM214A isoform X3 [Odocoileus virginianus texanus]	2.26483	1.1794	0.000200562	0.00413603	up	yes
MSTRG.303	PREDICTED: myelin protein zero-like protein 3 isoform X3 [Ailuropoda melanoleuca]	3.46001	1.79078	0.00020062	0.00413603	up	yes
MSTRG.27735	hypothetical protein Celaphus_00013821 [Cervus elaphus hippelaphus]	2.58695	1.37125	0.000203763	0.00419407	up	yes
MSTRG.7549	fibroblast growth factor receptor-like 1 [Bubalus bubalis]	2.43405	1.28336	0.000203991	0.00419407	up	yes
MSTRG.6487	hypothetical protein Celaphus_00001045, partial [Cervus elaphus hippelaphus]	3.58725	1.84288	0.000206942	0.00423991	up	yes
MSTRG.6071	ADAP2, partial [Cervus elaphus hippelaphus]	3.30359	1.72403	0.000207509	0.00424824	up	yes
MSTRG.10983	SHROOM1 [Cervus elaphus hippelaphus]	0.209565	-2.25453	0.000212909	0.00434531	down	yes
MSTRG.30294	CAMK1, partial [Cervus elaphus hippelaphus]	3.47613	1.79748	0.000213314	0.00434842	up	yes
MSTRG.15967	LRP10 [Cervus elaphus hippelaphus]	2.25335	1.17207	0.000213857	0.00435457	up	yes
MSTRG.1238	MRGPRF [Cervus elaphus hippelaphus]	0.145515	-2.78076	0.000214519	0.00435851	down	yes
MSTRG.25661	hypothetical protein Celaphus_00002447, partial [Cervus elaphus hippelaphus];hypothetical protein Celaphus_00002446, partial [Cervus elaphus hippelaphus]	2.81139	1.49128	0.000214622	0.00435851	up	yes
MSTRG.8605	RCAN2 [Cervus elaphus hippelaphus]	0.089613	-3.48015	0.000214875	0.00435851	down	yes
MSTRG.26999	MAL2, partial [Cervus elaphus hippelaphus]	6.86299	2.77884	0.000218016	0.00441207	up	yes
MSTRG.18126	hypothetical protein Celaphus_00011005 [Cervus elaphus hippelaphus]	2.59774	1.37725	0.00021899	0.004425	up	yes
MSTRG.688	hypothetical protein Celaphus_00009209 [Cervus elaphus hippelaphus]	3.16399	1.66174	0.000219957	0.00444115	up	yes
MSTRG.20310	probable low affinity copper uptake protein 2 isoform X1 [Odocoileus virginianus texanus]	3.21129	1.68315	0.000222457	0.00448673	up	yes
MSTRG.5556	hypothetical protein Celaphus_00000526, partial [Cervus elaphus hippelaphus]	2.5331	1.34091	0.000222554	0.00448673	up	yes
MSTRG.6872	JUP [Cervus elaphus hippelaphus]	2.24587	1.16728	0.000224459	0.00452169	up	yes
MSTRG.1665	SIAE [Cervus elaphus hippelaphus]	2.63437	1.39746	0.000232038	0.00465662	up	yes
MSTRG.5554	TBC1 domain family member 9 [Odocoileus virginianus texanus]	2.72889	1.44832	0.000237614	0.00475409	up	yes
MSTRG.23916	GALNT15 [Cervus elaphus hippelaphus]	3.9523	1.98269	0.000239705	0.00479228	up	yes
MSTRG.21406	adhesion G protein-coupled receptor A3 isoform X1 [Pan troglodytes]	2.54489	1.3476	0.000241032	0.00481518	up	yes
MSTRG.21530	UCHL1, partial [Cervus elaphus hippelaphus]	0.216369	-2.20844	0.00024258	0.00483516	down	yes
MSTRG.29383	hypothetical protein Celaphus_00007782 [Cervus elaphus hippelaphus]	2.14733	1.10254	0.000242581	0.00483516	up	yes
MSTRG.22782	FLNC [Cervus elaphus hippelaphus]	0.173549	-2.52659	0.000245108	0.00487326	down	yes
MSTRG.33889	FAM229B [Cervus elaphus hippelaphus]	2.99398	1.58206	0.000246333	0.00488794	up	yes
MSTRG.34756	GNA14 [Cervus elaphus hippelaphus]	3.53662	1.82237	0.000246339	0.00488794	up	yes
gene-Celaphus_00007549	MAP3K8 [Cervus elaphus hippelaphus]	6.11555	2.61248	0.000247341	0.00490047	up	yes
MSTRG.1833	hypothetical protein Celaphus_00013588, partial [Cervus elaphus hippelaphus]	0.230287	-2.1185	0.000250889	0.00495962	down	yes
MSTRG.368	tubulin-specific chaperone cofactor E-like protein [Odocoileus virginianus texanus]	2.19571	1.13469	0.000251189	0.00496183	up	yes
MSTRG.34013	hypothetical protein Celaphus_00018899, partial [Cervus elaphus hippelaphus]	9.46137	3.24205	0.000257929	0.00508358	up	yes
MSTRG.24790	hypothetical protein Celaphus_00001951 [Cervus elaphus hippelaphus]	2.41128	1.2698	0.000260437	0.00512536	up	yes
MSTRG.30657	LAMB2 [Cervus elaphus hippelaphus]	2.20922	1.14354	0.000261211	0.0051353	up	yes
MSTRG.2758	unnamed protein product [Xenopus laevis]	14.1208	3.81975	0.000264478	0.00518558	up	yes
MSTRG.24254	SLC25A36, partial [Cervus elaphus hippelaphus]	3.99157	1.99696	0.000266082	0.0052093	up	yes
MSTRG.19888	hypothetical protein Celaphus_00008697 [Cervus elaphus hippelaphus]	3.51136	1.81203	0.0002682	0.00523912	up	yes
MSTRG.3832	CEBPA [Cervus elaphus hippelaphus]	3.77016	1.91462	0.000277683	0.00540838	up	yes
MSTRG.16914	Secretory carrier-associated membrane protein 5, partial [Bos mutus]	8.90875	3.15522	0.000279248	0.00543162	up	yes
MSTRG.37444	hypothetical protein Celaphus_00015831, partial [Cervus elaphus hippelaphus];hypothetical protein Celaphus_00015830, partial [Cervus elaphus hippelaphus]	2.11941	1.08366	0.000279527	0.00543162	up	yes
MSTRG.8678	PREDICTED: complement factor B isoform X2 [Camelus bactrianus]	4.3443	2.11912	0.000279698	0.00543162	up	yes
MSTRG.14288	TPA: latent transforming growth factor beta binding protein 1 [Bos taurus];LTBP1 [Cervus elaphus hippelaphus]	0.230864	-2.11488	0.000282085	0.00545792	down	yes
MSTRG.24726	hypothetical protein Celaphus_00001897 [Cervus elaphus hippelaphus]	2.7143	1.44058	0.000284675	0.00549032	up	yes
gene-Celaphus_00007039	IL21R [Cervus elaphus hippelaphus]	4.62535	2.20956	0.000286421	0.00551356	up	yes
MSTRG.30585	CACNA1D, partial [Cervus elaphus hippelaphus]	0.140054	-2.83594	0.000287145	0.00551945	down	yes
MSTRG.12493	hypothetical protein Celaphus_00007213, partial [Cervus elaphus hippelaphus]	2.91932	1.54563	0.000288058	0.00553168	up	yes
gene-Celaphus_00002199	hypothetical protein Celaphus_00002199 [Cervus elaphus hippelaphus]	9.07423	3.18178	0.0002882	0.00553168	up	yes
MSTRG.20836	V-type proton ATPase subunit B, brain isoform, partial [Bos mutus]	3.10799	1.63598	0.000294294	0.00562821	up	yes
MSTRG.13508	MAPRE3 [Cervus elaphus hippelaphus]	2.17446	1.12066	0.000297149	0.00567459	up	yes
MSTRG.13102	hypothetical protein Celaphus_00005210 [Cervus elaphus hippelaphus]	2.31132	1.20872	0.000302369	0.00573503	up	yes
MSTRG.21246	PREDICTED: DNA damage-inducible transcript 4-like protein [Lipotes vexillifer]	6.17412	2.62623	0.000302731	0.00573503	up	yes
MSTRG.6124	LGALS9 [Cervus elaphus hippelaphus]	2.35825	1.23772	0.000304475	0.00576039	up	yes
MSTRG.17896	EXO1, partial [Cervus elaphus hippelaphus]	0.221593	-2.17402	0.000308162	0.00580935	down	yes
MSTRG.29743	DBNDD2 [Cervus elaphus hippelaphus]	2.53863	1.34405	0.000314784	0.00591311	up	yes
MSTRG.2388	BIN2 [Cervus elaphus hippelaphus]	3.77303	1.91572	0.000317058	0.0059516	up	yes
MSTRG.2368	KRT7 [Cervus elaphus hippelaphus]	7.2849	2.86491	0.000319438	0.00599086	up	yes
MSTRG.12252	hypothetical protein Celaphus_00007105 [Cervus elaphus hippelaphus]	6.40423	2.67902	0.000322564	0.00603779	up	yes
MSTRG.27865	TSPAN11, partial [Cervus elaphus hippelaphus]	2.10636	1.07475	0.000328294	0.00613636	up	yes
MSTRG.9384	GALE [Cervus elaphus hippelaphus]	2.626	1.39287	0.000330364	0.00617068	up	yes
MSTRG.7875	extracellular matrix protein FRAS1 [Odocoileus virginianus texanus];hypothetical protein Celaphus_00017360 [Cervus elaphus hippelaphus]	0.14319	-2.804	0.000331825	0.0061936	down	yes
MSTRG.39032	VSIG4, partial [Cervus elaphus hippelaphus]	4.79651	2.26199	0.000335	0.00623526	up	yes
MSTRG.1399	FRMD8 [Cervus elaphus hippelaphus]	2.08967	1.06328	0.000336746	0.00626333	up	yes
MSTRG.649	stromal interaction molecule 1 precursor [Macaca mulatta]	2.29224	1.19676	0.000337783	0.00627165	up	yes
MSTRG.30442	hypothetical protein Celaphus_00010380, partial [Cervus elaphus hippelaphus]	2.3096	1.20764	0.000340191	0.00630966	up	yes
MSTRG.969	CRY2, partial [Cervus elaphus hippelaphus]	3.02086	1.59496	0.000345412	0.00638407	up	yes
MSTRG.18935	serglycin [Odocoileus virginianus texanus]	2.93841	1.55504	0.000346013	0.00639073	up	yes
MSTRG.1664	NRGN [Cervus elaphus hippelaphus]	2.61253	1.38545	0.000356731	0.00656574	up	yes
gene-Celaphus_00018686	TLR6, partial [Cervus elaphus hippelaphus]	11.6357	3.54049	0.000358579	0.00659058	up	yes
MSTRG.13784	CAPG, partial [Cervus elaphus hippelaphus]	2.06242	1.04434	0.000361317	0.00662707	up	yes
MSTRG.1513	ROM1 [Cervus elaphus hippelaphus]	2.47999	1.31033	0.000365055	0.00667971	up	yes
MSTRG.16321	hypothetical protein Celaphus_00006651, partial [Cervus elaphus hippelaphus]	2.17374	1.12018	0.000365935	0.00667971	up	yes
MSTRG.23682	hypothetical protein Celaphus_00012649, partial [Cervus elaphus hippelaphus]	7.65859	2.93708	0.000366209	0.00667971	up	yes
MSTRG.37106	hypothetical protein Celaphus_00015655 [Cervus elaphus hippelaphus]	0.0390076	-4.6801	0.000366918	0.00668803	down	yes
MSTRG.1415	TM7SF2 [Cervus elaphus hippelaphus]	4.02311	2.00831	0.000369026	0.00670487	up	yes
gene-Celaphus_00012972	hypothetical protein Celaphus_00012972, partial [Cervus elaphus hippelaphus]	4.02048	2.00737	0.000370661	0.00672841	up	yes
MSTRG.33279	TPA: netrin receptor DCC-like [Bos taurus]	0.135073	-2.88819	0.000371458	0.00673825	down	yes
MSTRG.18349	MR1 [Cervus elaphus hippelaphus]	2.29281	1.19711	0.000375955	0.00681515	up	yes
MSTRG.26789	SDCBP [Cervus elaphus hippelaphus]	2.23831	1.16241	0.000380886	0.00689037	up	yes
MSTRG.34043	hypothetical protein Celaphus_00018911 [Cervus elaphus hippelaphus]	3.17196	1.66537	0.000381279	0.00689169	up	yes
MSTRG.11781	hypothetical protein Celaphus_00006738 [Cervus elaphus hippelaphus]	2.87187	1.52199	0.000383562	0.00691983	up	yes
MSTRG.32092	CITED2 [Cervus elaphus hippelaphus]	3.36672	1.75135	0.000389122	0.006989	up	yes
MSTRG.9767	PREDICTED: ephrin type-A receptor 4 isoform X7 [Ovis aries musimon]	2.85304	1.5125	0.000391576	0.00701175	up	yes
MSTRG.2773	leucine-rich repeats and immunoglobulin-like domains protein 3 isoform X1 [Odocoileus virginianus texanus]	0.26109	-1.93738	0.000397629	0.00710571	down	yes
MSTRG.28315	CSF2RB [Cervus elaphus hippelaphus]	2.65761	1.41013	0.000398133	0.0071099	up	yes
MSTRG.8381	hypothetical protein Celaphus_00014251 [Cervus elaphus hippelaphus]	0.218245	-2.19598	0.000401017	0.00714692	down	yes
MSTRG.37230	hypothetical protein Celaphus_00015702 [Cervus elaphus hippelaphus]	5.37036	2.42502	0.000407897	0.00723052	up	yes
MSTRG.25796	TMEM59 [Cervus elaphus hippelaphus]	2.30096	1.20224	0.000418907	0.00738606	up	yes
MSTRG.38552	hypothetical protein Celaphus_00009761 [Cervus elaphus hippelaphus];TSC22D3 [Cervus elaphus hippelaphus]	2.63178	1.39604	0.000421073	0.00741931	up	yes
MSTRG.5081	hypothetical protein Celaphus_00000264, partial [Cervus elaphus hippelaphus]	2.27783	1.18766	0.00042156	0.00742295	up	yes
MSTRG.29221	sialoadhesin [Odocoileus virginianus texanus]	12.1298	3.60048	0.000431672	0.00757183	up	yes
MSTRG.12876	SARDH [Cervus elaphus hippelaphus]	2.8303	1.50095	0.000431734	0.00757183	up	yes
MSTRG.24321	TPA: Zic family member 1-like [Bos taurus]	0.127543	-2.97094	0.00043437	0.00759286	down	yes
MSTRG.25344	F3, partial [Cervus elaphus hippelaphus]	0.214629	-2.22008	0.00043669	0.00762522	down	yes
MSTRG.16689	NMB [Cervus elaphus hippelaphus]	14.4472	3.85272	0.000442098	0.00770755	up	yes
gene-Celaphus_00015864	CYTIP [Cervus elaphus hippelaphus]	4.114	2.04054	0.000443759	0.00773141	up	yes
MSTRG.21429	protein sel-1 homolog 3 [Odocoileus virginianus texanus]	14.7677	3.88438	0.00044548	0.00775118	up	yes
MSTRG.19645	UBTD1, partial [Cervus elaphus hippelaphus]	2.10501	1.07382	0.000447038	0.00776805	up	yes
MSTRG.12240	hypothetical protein Celaphus_00007068 [Cervus elaphus hippelaphus];GDPD3 [Cervus elaphus hippelaphus]	2.17244	1.11932	0.000454604	0.0078788	up	yes
MSTRG.14518	alpha-1,3-mannosyl-glycoprotein 4-beta-N-acetylglucosaminyltransferase A [Bos indicus x Bos taurus]	3.20892	1.68209	0.000461984	0.00797675	up	yes
MSTRG.16675	PREDICTED: furin isoform X2 [Vicugna pacos]	2.21984	1.15046	0.000466336	0.00802949	up	yes
MSTRG.6718	OSBPL7 [Cervus elaphus hippelaphus]	2.1375	1.09592	0.000468885	0.00806287	up	yes
MSTRG.22220	PIK3CG [Cervus elaphus hippelaphus]	3.30249	1.72355	0.000471798	0.00809716	up	yes
MSTRG.12216	LAT [Cervus elaphus hippelaphus]	5.56531	2.47646	0.000473009	0.00810216	up	yes
gene-Celaphus_00016671	hypothetical protein Celaphus_00016671 [Cervus elaphus hippelaphus]	2.92459	1.54823	0.000478144	0.0081795	up	yes
MSTRG.27894	CD9 [Cervus elaphus hippelaphus]	2.2161	1.14802	0.000487647	0.00829096	up	yes
MSTRG.8123	RASL11B [Cervus elaphus hippelaphus]	2.96816	1.56957	0.000503789	0.00849938	up	yes
MSTRG.8403	RNF8, partial [Cervus elaphus hippelaphus]	3.92286	1.97191	0.000516743	0.00867695	up	yes
MSTRG.35972	IFNAR2 [Cervus elaphus hippelaphus]	0.266236	-1.90922	0.000518759	0.00869974	down	yes
MSTRG.2898	NTN4 [Cervus elaphus hippelaphus]	3.39181	1.76206	0.000524275	0.00877554	up	yes
MSTRG.6796	hypothetical protein Celaphus_00001250 [Cervus elaphus hippelaphus]	3.06655	1.61661	0.000529381	0.0088436	up	yes
MSTRG.4084	DMKN, partial [Cervus elaphus hippelaphus]	21.38	4.41819	0.000529679	0.0088436	up	yes
MSTRG.26211	hypothetical protein Celaphus_00002784, partial [Cervus elaphus hippelaphus]	2.35439	1.23535	0.00053139	0.00886511	up	yes
MSTRG.15109	PRKCH [Cervus elaphus hippelaphus]	2.07104	1.05035	0.000544666	0.00904668	up	yes
MSTRG.1707	hypothetical protein Celaphus_00013555 [Cervus elaphus hippelaphus]	2.12474	1.08728	0.000544923	0.00904668	up	yes
MSTRG.13882	NCK2 [Cervus elaphus hippelaphus]	2.19673	1.13536	0.000548451	0.00908243	up	yes
MSTRG.19571	RBP4 [Cervus elaphus hippelaphus]	2.13017	1.09097	0.000553254	0.00914478	up	yes
MSTRG.7002	ITGB3 [Cervus elaphus hippelaphus]	3.58134	1.8405	0.000561991	0.0092718	up	yes
MSTRG.22210	synaptophysin-like protein 1 [Odocoileus virginianus texanus]	1.9828	0.987537	0.000563394	0.00928107	up	no
MSTRG.8614	PLA2G7 [Cervus elaphus hippelaphus]	22.0775	4.4645	0.000563606	0.00928107	up	yes
MSTRG.21158	hypothetical protein Celaphus_00018547 [Cervus elaphus hippelaphus]	2.16094	1.11166	0.000584168	0.00957789	up	yes
gene-Celaphus_00017199	hypothetical protein Celaphus_00017199 [Cervus elaphus hippelaphus]	3.17067	1.66479	0.000592873	0.00969776	up	yes
MSTRG.14604	hypothetical protein Celaphus_00005871 [Cervus elaphus hippelaphus];hypothetical protein Celaphus_00005870, partial [Cervus elaphus hippelaphus]	3.26576	1.70742	0.000592947	0.00969776	up	yes
MSTRG.8695	hypothetical protein Celaphus_00014456 [Cervus elaphus hippelaphus]	4.8669	2.283	0.000597387	0.00975137	up	yes
MSTRG.8664	hypothetical protein Celaphus_00014423 [Cervus elaphus hippelaphus]	2.58009	1.36742	0.0005977	0.00975137	up	yes
MSTRG.15112	PRKCH [Cervus elaphus hippelaphus]	2.0873	1.06164	0.000599865	0.00977462	up	yes
MSTRG.26210	hypothetical protein Celaphus_00002783 [Cervus elaphus hippelaphus]	2.29978	1.2015	0.000610011	0.0099094	up	yes
MSTRG.8300	PSMB9 [Cervus elaphus hippelaphus]	2.55339	1.35241	0.000615214	0.00996941	up	yes
MSTRG.5583	GAB1, partial [Cervus elaphus hippelaphus]	2.389	1.25641	0.000616845	0.00997978	up	yes
MSTRG.12878	PREDICTED: sarcosine dehydrogenase, mitochondrial isoform X1 [Bos mutus]	2.95387	1.56261	0.000626502	0.0101028	up	yes
gene-Celaphus_00008391	WD repeat- and FYVE domain-containing protein 4 [Odocoileus virginianus texanus]	4.68279	2.22737	0.000626977	0.0101043	up	yes
MSTRG.3900	PLD3 [Cervus elaphus hippelaphus]	2.10142	1.07136	0.00064385	0.0103249	up	yes
MSTRG.25709	KANK4 [Cervus elaphus hippelaphus]	0.165588	-2.59433	0.000647592	0.010367	down	yes
MSTRG.25683	hypothetical protein Celaphus_00002464 [Cervus elaphus hippelaphus]	0.316641	-1.65908	0.000650835	0.0104126	down	yes
MSTRG.18731	GPR137B, partial [Cervus elaphus hippelaphus]	2.25935	1.17591	0.000653142	0.0104368	up	yes
MSTRG.27889	VWF [Cervus elaphus hippelaphus]	2.49303	1.3179	0.000654712	0.0104556	up	yes
MSTRG.21075	CFI, partial [Cervus elaphus hippelaphus]	3.3512	1.74468	0.000670587	0.0106769	up	yes
MSTRG.31360	MAP3K1 [Cervus elaphus hippelaphus]	2.23045	1.15733	0.000682085	0.0108321	up	yes
MSTRG.16257	HOMER1 [Cervus elaphus hippelaphus]	0.304207	-1.71687	0.000701595	0.0110772	down	yes
MSTRG.24908	annexin A9 isoform X1 [Odocoileus virginianus texanus]	5.61556	2.48943	0.000711671	0.0112094	up	yes
MSTRG.31097	STC2 [Cervus elaphus hippelaphus]	2.10923	1.07672	0.000719095	0.0112923	up	yes
MSTRG.4209	QPCTL, partial [Cervus elaphus hippelaphus]	1.97293	0.980343	0.00072221	0.0113219	up	no
MSTRG.34147	hypothetical protein Celaphus_00018959, partial [Cervus elaphus hippelaphus];PREDICTED: transcription regulator protein BACH2 isoform X4 [Ovis aries musimon]	0.222729	-2.16664	0.000722662	0.0113219	down	yes
MSTRG.29241	BMP2 [Cervus elaphus hippelaphus]	2.43152	1.28186	0.000726146	0.0113694	up	yes
MSTRG.21976	hypothetical protein Celaphus_00011929 [Cervus elaphus hippelaphus]	2.13925	1.0971	0.000739332	0.0115376	up	yes
MSTRG.29555	uncharacterized protein LOC110137573 [Odocoileus virginianus texanus]	2.20629	1.14162	0.00073949	0.0115376	up	yes
MSTRG.6464	hypothetical protein Celaphus_00001028 [Cervus elaphus hippelaphus]	2.7335	1.45075	0.000744559	0.011603	up	yes
MSTRG.3835	xaa-Pro dipeptidase isoform X1 [Odocoileus virginianus texanus]	1.89285	0.92056	0.000745485	0.0116038	up	no
MSTRG.676	PDE2A, partial [Cervus elaphus hippelaphus]	2.12493	1.08741	0.000745951	0.0116042	up	yes
MSTRG.4913	hypothetical protein Celaphus_00000171 [Cervus elaphus hippelaphus];hypothetical protein Celaphus_00000170 [Cervus elaphus hippelaphus]	0.271074	-1.88324	0.00074826	0.0116332	down	yes
MSTRG.20559	PREDICTED: mimecan isoform X2 [Propithecus coquereli]	0.190824	-2.38969	0.000749166	0.011636	down	yes
MSTRG.5550	CLGN [Cervus elaphus hippelaphus]	10.1374	3.34162	0.000749318	0.011636	up	yes
MSTRG.35474	CRYL1 [Cervus elaphus hippelaphus]	2.83868	1.50522	0.000750405	0.0116392	up	yes
MSTRG.18990	PSAP [Cervus elaphus hippelaphus]	2.25392	1.17244	0.000751823	0.0116544	up	yes
MSTRG.29756	NEURL2 [Cervus elaphus hippelaphus]	2.37865	1.25014	0.000756037	0.0117128	up	yes
MSTRG.15622	NID2 [Cervus elaphus hippelaphus]	2.0901	1.06357	0.000759551	0.0117397	up	yes
gene-Celaphus_00005308	FAM84A [Cervus elaphus hippelaphus]	3.9366	1.97695	0.000784083	0.0120621	up	yes
MSTRG.24799	IL6R [Cervus elaphus hippelaphus]	3.46938	1.79468	0.000784518	0.0120621	up	yes
MSTRG.23786	HCLS1, partial [Cervus elaphus hippelaphus];hypothetical protein Celaphus_00012714 [Cervus elaphus hippelaphus]	2.09407	1.06631	0.000798256	0.012252	up	yes
MSTRG.34817	UNC13B [Cervus elaphus hippelaphus]	1.97611	0.982664	0.000810961	0.0124038	up	no
MSTRG.20236	TNFSF8 [Cervus elaphus hippelaphus]	13.8087	3.78751	0.000823013	0.0125647	up	yes
MSTRG.1163	uncharacterized protein LOC102407694 isoform X6 [Bubalus bubalis]	2.03245	1.02322	0.000823382	0.0125647	up	yes
MSTRG.1166	TSPAN4 [Cervus elaphus hippelaphus]	1.88602	0.915347	0.000824634	0.012566	up	no
MSTRG.38119	ATP1B4 [Cervus elaphus hippelaphus]	0.0485957	-4.36303	0.00082537	0.012566	down	yes
MSTRG.29634	TGM2 [Cervus elaphus hippelaphus]	2.19322	1.13305	0.000828205	0.0126019	up	yes
MSTRG.24839	PREDICTED: protein S100-A4 isoform X1 [Colobus angolensis palliatus]	2.11652	1.0817	0.000834494	0.0126757	up	yes
MSTRG.12819	hypothetical protein Celaphus_00005016, partial [Cervus elaphus hippelaphus]	3.16739	1.66329	0.000854145	0.0128956	up	yes
MSTRG.7540	CPLX1 [Cervus elaphus hippelaphus]	4.73528	2.24345	0.000857218	0.0129317	up	yes
MSTRG.9045	transmembrane protein 170B isoform X1 [Ovis aries]	3.61674	1.85469	0.000862847	0.0130092	up	yes
MSTRG.36530	AGA [Cervus elaphus hippelaphus]	2.11744	1.08232	0.00086883	0.013077	up	yes
MSTRG.6530	cytospin-B isoform X1 [Odocoileus virginianus texanus];hypothetical protein Celaphus_00001073, partial [Cervus elaphus hippelaphus]	2.16064	1.11146	0.000877587	0.0132013	up	yes
MSTRG.290	FXYD6, partial [Cervus elaphus hippelaphus]	2.00855	1.00616	0.000878302	0.0132045	up	yes
MSTRG.39618	hypothetical protein Celaphus_00010162 [Cervus elaphus hippelaphus];hypothetical protein Celaphus_00010163 [Cervus elaphus hippelaphus]	2.01029	1.0074	0.000882296	0.0132495	up	yes
MSTRG.6769	hypothetical protein Celaphus_00001223 [Cervus elaphus hippelaphus]	2.00758	1.00546	0.000884652	0.0132698	up	yes
MSTRG.26854	hypothetical protein Celaphus_00016291, partial [Cervus elaphus hippelaphus]	3.373	1.75403	0.000891651	0.0133445	up	yes
MSTRG.13493	DTNB [Cervus elaphus hippelaphus]	2.68389	1.42432	0.000896703	0.0133858	up	yes
MSTRG.2362	hypothetical protein Celaphus_00011436 [Cervus elaphus hippelaphus]	1.98011	0.985584	0.000898536	0.0133869	up	no
MSTRG.12192	IL4R [Cervus elaphus hippelaphus]	1.8635	0.898014	0.000904867	0.0134227	up	no
MSTRG.15481	unconventional myosin-Ie [Ovis aries];PREDICTED: unconventional myosin-Ie [Mustela putorius furo]	2.26626	1.18032	0.000906628	0.0134317	up	yes
MSTRG.813	leucine-rich repeat-containing G-protein coupled receptor 4 [Odocoileus virginianus texanus]	1.98799	0.991312	0.000908063	0.0134454	up	no
gene-Celaphus_00008410	ALOX5 [Cervus elaphus hippelaphus]	5.26564	2.39661	0.000918211	0.0135729	up	yes
MSTRG.7241	SOCS3 [Cervus elaphus hippelaphus]	1.97805	0.98408	0.000935574	0.0137987	up	no
MSTRG.37085	hypothetical protein Celaphus_00015649 [Cervus elaphus hippelaphus]	2.19143	1.13187	0.000945644	0.0139239	up	yes
MSTRG.7249	SYNGR2 [Cervus elaphus hippelaphus]	1.93689	0.953741	0.000947559	0.0139443	up	no
MSTRG.33391	hypothetical protein Celaphus_00017842, partial [Cervus elaphus hippelaphus]	2.50844	1.32679	0.000950041	0.0139653	up	yes
MSTRG.5724	SFRP2 [Cervus elaphus hippelaphus]	0.10074	-3.31129	0.000954739	0.014011	down	yes
MSTRG.34354	Putative threonine protease PRSS50 [Bos mutus]	3.15481	1.65756	0.000958414	0.0140493	up	yes
MSTRG.19525	PPP1R3C, partial [Cervus elaphus hippelaphus]	2.33355	1.22252	0.000960714	0.0140689	up	yes
MSTRG.37806	GLI2 [Cervus elaphus hippelaphus]	1.99394	0.995621	0.00096208	0.0140796	up	no
MSTRG.221	IL18 [Cervus elaphus hippelaphus]	4.40177	2.13808	0.000967245	0.0141395	up	yes
MSTRG.34019	hypothetical protein Celaphus_00018902 [Cervus elaphus hippelaphus]	1.97024	0.978371	0.000968563	0.0141432	up	no
MSTRG.9331	C1QC [Cervus elaphus hippelaphus]	4.33363	2.11558	0.000968565	0.0141432	up	yes
MSTRG.21311	Hematopoietic prostaglandin D synthase, partial [Myotis davidii]	4.27047	2.09439	0.00097004	0.0141569	up	yes
MSTRG.9515	FGR [Cervus elaphus hippelaphus]	2.53373	1.34126	0.000971264	0.0141669	up	yes
MSTRG.17575	DSTYK [Cervus elaphus hippelaphus]	1.93939	0.955602	0.000979284	0.0142525	up	no
MSTRG.15076	RAB15 [Cervus elaphus hippelaphus]	2.68929	1.42723	0.000983543	0.0143017	up	yes
MSTRG.8603	ENPP4 [Cervus elaphus hippelaphus]	2.46568	1.30198	0.00100355	0.0145035	up	yes
MSTRG.3727	hypothetical protein Celaphus_00004291 [Cervus elaphus hippelaphus]	2.36548	1.24214	0.00100676	0.0145324	up	yes
MSTRG.3433	hypothetical protein Celaphus_00004089 [Cervus elaphus hippelaphus]	3.56726	1.83482	0.00101058	0.0145637	up	yes
MSTRG.14708	GALC, partial [Cervus elaphus hippelaphus];galactocerebrosidase isoform X3 [Odocoileus virginianus texanus]	2.37002	1.2449	0.00101443	0.0146032	up	yes
MSTRG.6841	RAPGEFL1, partial [Cervus elaphus hippelaphus]	2.37591	1.24848	0.00101822	0.0146396	up	yes
MSTRG.6304	PREDICTED: mediator of RNA polymerase II transcription subunit 31 [Chlorocebus sabaeus]	2.36075	1.23924	0.00103155	0.0148012	up	yes
MSTRG.8050	hypothetical protein Celaphus_00017483, partial [Cervus elaphus hippelaphus]	0.244518	-2.03199	0.00105222	0.0150488	down	yes
MSTRG.14871	NPC2 [Cervus elaphus hippelaphus]	2.4	1.26303	0.00105492	0.0150712	up	yes
MSTRG.24718	unnamed protein product, partial [Gulo gulo]	0.268294	-1.89811	0.00105701	0.0150847	down	yes
MSTRG.9739	SERPINE2 [Cervus elaphus hippelaphus]	2.41989	1.27494	0.00105773	0.0150868	up	yes
MSTRG.15843	hypothetical protein Celaphus_00006407, partial [Cervus elaphus hippelaphus]	0.241264	-2.05132	0.00106176	0.0151279	down	yes
MSTRG.9747	MOGAT1, partial [Cervus elaphus hippelaphus]	0.297054	-1.7512	0.00106311	0.015139	down	yes
MSTRG.12828	hypothetical protein Celaphus_00005024, partial [Cervus elaphus hippelaphus]	1.92111	0.941939	0.001069	0.0152064	up	no
MSTRG.25393	unnamed protein product [Xenopus laevis]	2.51867	1.33266	0.00107087	0.0152249	up	yes
MSTRG.10005	histone protein Hist3h2bb [Mus musculus]	0.227399	-2.1367	0.00107549	0.0152741	down	yes
MSTRG.19195	hypothetical protein Celaphus_00008335 [Cervus elaphus hippelaphus];hypothetical protein Celaphus_00008334 [Cervus elaphus hippelaphus]	2.19915	1.13694	0.00108246	0.0153485	up	yes
MSTRG.5770	CPE [Cervus elaphus hippelaphus]	6.15628	2.62206	0.00108553	0.015378	up	yes
MSTRG.18188	MXRA8 [Cervus elaphus hippelaphus]	2.17666	1.12212	0.0010877	0.015378	up	yes
MSTRG.23235	BCHE [Cervus elaphus hippelaphus]	0.272827	-1.87394	0.00109883	0.0155057	down	yes
MSTRG.27934	C1R [Cervus elaphus hippelaphus]	2.41044	1.2693	0.00110727	0.0156081	up	yes
MSTRG.15770	hypothetical protein Celaphus_00006367 [Cervus elaphus hippelaphus]	9.28726	3.21525	0.00111373	0.0156658	up	yes
MSTRG.9779	INHA [Cervus elaphus hippelaphus]	2.33761	1.22504	0.00111518	0.0156774	up	yes
MSTRG.31143	hypothetical protein Celaphus_00017915 [Cervus elaphus hippelaphus]	0.194297	-2.36367	0.00111575	0.0156774	down	yes
MSTRG.31900	hypothetical protein Celaphus_00018142 [Cervus elaphus hippelaphus]	0.279717	-1.83796	0.00112905	0.0158474	down	yes
MSTRG.36831	FGFR1 [Cervus elaphus hippelaphus]	2.00413	1.00298	0.00114273	0.0160055	up	yes
MSTRG.26938	LY96 [Cervus elaphus hippelaphus]	2.2394	1.16311	0.00114339	0.0160063	up	yes
MSTRG.1134	MS4A7, partial [Cervus elaphus hippelaphus]	6.8417	2.77436	0.00117103	0.0163068	up	yes
MSTRG.11061	EGR1 [Cervus elaphus hippelaphus]	2.00706	1.00509	0.0011795	0.0163915	up	yes
MSTRG.12765	hypothetical protein Celaphus_00007392 [Cervus elaphus hippelaphus]	1.98388	0.988322	0.00117959	0.0163915	up	no
MSTRG.21073	ELOVL6 [Cervus elaphus hippelaphus]	0.264917	-1.91639	0.00118277	0.0164098	down	yes
MSTRG.4303	DBP [Cervus elaphus hippelaphus]	2.35382	1.235	0.00118738	0.016465	up	yes
MSTRG.6681	hypothetical protein Celaphus_00001166 [Cervus elaphus hippelaphus]	2.31872	1.21333	0.00119219	0.0164971	up	yes
MSTRG.13496	KIF3C [Cervus elaphus hippelaphus]	1.8268	0.869321	0.00119469	0.0165231	up	no
MSTRG.13559	PREDICTED: protein LBH, partial [Pantholops hodgsonii]	2.23503	1.1603	0.00119977	0.0165587	up	yes
MSTRG.4996	hypothetical protein Celaphus_00000196 [Cervus elaphus hippelaphus]	1.88531	0.914804	0.00120659	0.0166095	up	no
MSTRG.30673	DAG1 [Cervus elaphus hippelaphus]	2.11237	1.07886	0.00120848	0.0166268	up	yes
MSTRG.26620	MYC, partial [Cervus elaphus hippelaphus]	0.273726	-1.8692	0.00122485	0.0167996	down	yes
MSTRG.37926	RFTN2, partial [Cervus elaphus hippelaphus]	2.26756	1.18114	0.00123799	0.0169358	up	yes
MSTRG.3345	hypothetical protein Celaphus_00004022 [Cervus elaphus hippelaphus]	3.02419	1.59655	0.00124714	0.0170427	up	yes
MSTRG.10083	PGPEP1 [Cervus elaphus hippelaphus]	2.82539	1.49845	0.00124887	0.0170427	up	yes
MSTRG.9634	E3 ubiquitin-protein ligase RNF19B isoform X1 [Odocoileus virginianus texanus]	2.00873	1.00628	0.00125773	0.0171261	up	yes
MSTRG.38918	SLC38A5 [Cervus elaphus hippelaphus]	0.200779	-2.31632	0.00126727	0.0172294	down	yes
MSTRG.20564	cathepsin L2 [Odocoileus virginianus texanus]	1.96053	0.971242	0.00131095	0.0177234	up	no
MSTRG.9330	C1QA [Cervus elaphus hippelaphus]	3.33653	1.73835	0.0013311	0.0179587	up	yes
MSTRG.13289	PREDICTED: DNA-binding protein inhibitor ID-2 [Ovis aries musimon]	2.29721	1.19988	0.00133897	0.0180464	up	yes
gene-Celaphus_00004108	SNX20 [Cervus elaphus hippelaphus]	3.35966	1.74832	0.00135189	0.0181741	up	yes
MSTRG.2377	ACVRL1 [Cervus elaphus hippelaphus]	1.8865	0.915714	0.00137617	0.0184443	up	no
MSTRG.16447	hypothetical protein Celaphus_00015132 [Cervus elaphus hippelaphus];hypothetical protein Celaphus_00015133 [Cervus elaphus hippelaphus]	1.8703	0.903269	0.00138722	0.0185548	up	no
MSTRG.15350	hypothetical protein Celaphus_00006198, partial [Cervus elaphus hippelaphus];hypothetical protein Celaphus_00006197, partial [Cervus elaphus hippelaphus]	2.5158	1.33102	0.00139296	0.0186127	up	yes
MSTRG.13568	EH domain-containing protein 3 [Odocoileus virginianus texanus]	2.30145	1.20254	0.00140562	0.0187605	up	yes
MSTRG.17363		0.11271	-3.14931	0.00143963	0.0191904	down	yes
gene-Celaphus_00003467	HK3 [Cervus elaphus hippelaphus]	3.39359	1.76281	0.00146436	0.0193903	up	yes
MSTRG.27609	hypothetical protein Celaphus_00013719 [Cervus elaphus hippelaphus]	2.15829	1.10989	0.00146555	0.0193912	up	yes
MSTRG.13172	hypothetical protein Celaphus_00005239, partial [Cervus elaphus hippelaphus];hypothetical protein Celaphus_00005240, partial [Cervus elaphus hippelaphus]	2.15004	1.10436	0.00147069	0.0194207	up	yes
MSTRG.17823	hypothetical protein Celaphus_00010865 [Cervus elaphus hippelaphus]	2.11206	1.07865	0.00147106	0.0194207	up	yes
MSTRG.30091	CRTAP [Cervus elaphus hippelaphus]	3.08532	1.62542	0.00147794	0.0194882	up	yes
MSTRG.26054	CTPS1 [Cervus elaphus hippelaphus]	0.297838	-1.7474	0.00147912	0.0194882	down	yes
MSTRG.5551	CLGN, partial [Cervus elaphus hippelaphus]	10.2895	3.3631	0.00148908	0.0196095	up	yes
MSTRG.37248	SEC14 domain and spectrin repeat-containing protein 1 isoform X3 [Bubalus bubalis]	2.18008	1.12438	0.00149594	0.0196738	up	yes
MSTRG.24523	RCSD1, partial [Cervus elaphus hippelaphus]	2.18867	1.13006	0.00150292	0.0197328	up	yes
MSTRG.2231	hypothetical protein Celaphus_00011366, partial [Cervus elaphus hippelaphus]	2.28111	1.18974	0.00151064	0.0198047	up	yes
MSTRG.16110	kinesin-like protein KIF23 isoform X1 [Odocoileus virginianus texanus]	0.305758	-1.70954	0.00153391	0.0200799	down	yes
MSTRG.27533	cadherin EGF LAG seven-pass G-type receptor 1 [Odocoileus virginianus texanus];PREDICTED: LOW QUALITY PROTEIN: cadherin EGF LAG seven-pass G-type receptor 1 [Bos mutus]	0.185436	-2.431	0.00153791	0.0201123	down	yes
MSTRG.7822	TMEM150C [Cervus elaphus hippelaphus]	2.14972	1.10415	0.00154025	0.020123	up	yes
MSTRG.24343	GYG1, partial [Cervus elaphus hippelaphus]	1.90556	0.930218	0.00154215	0.0201378	up	no
MSTRG.2711	GNS [Cervus elaphus hippelaphus]	2.244	1.16607	0.00155637	0.0202834	up	yes
MSTRG.29236	spermine oxidase [Bos taurus]	2.18184	1.12554	0.0015948	0.0207026	up	yes
MSTRG.26244	DGKD [Cervus elaphus hippelaphus]	1.74951	0.806951	0.00159754	0.0207281	up	no
MSTRG.8337	hypothetical protein Celaphus_00014223 [Cervus elaphus hippelaphus]	2.68683	1.42591	0.00162984	0.0210953	up	yes
MSTRG.26998	NOV, partial [Cervus elaphus hippelaphus]	0.22208	-2.17085	0.00163803	0.0211909	down	yes
MSTRG.10098	hypothetical protein Celaphus_00002977, partial [Cervus elaphus hippelaphus]	3.1827	1.67025	0.00164729	0.0212671	up	yes
MSTRG.23534	hypothetical protein M91_05072 [Bos mutus];ETV5 [Cervus elaphus hippelaphus]	1.83251	0.873819	0.00164924	0.0212734	up	no
MSTRG.38267	hypothetical protein Celaphus_00009547 [Cervus elaphus hippelaphus]	0.284311	-1.81446	0.00165458	0.021332	down	yes
MSTRG.32621	hypothetical protein Celaphus_00019194 [Cervus elaphus hippelaphus]	2.10728	1.07538	0.00166261	0.021425	up	yes
MSTRG.2390	DAZAP2 [Cervus elaphus hippelaphus]	2.08868	1.06259	0.00168502	0.0216295	up	yes
MSTRG.15179	hypothetical protein Celaphus_00006121, partial [Cervus elaphus hippelaphus]	2.28478	1.19205	0.00169687	0.021771	up	yes
MSTRG.16048	CIDEB [Cervus elaphus hippelaphus]	0.19979	-2.32344	0.00171117	0.0219014	down	yes
MSTRG.19855	hypothetical protein Celaphus_00008679 [Cervus elaphus hippelaphus]	2.1437	1.1001	0.00172578	0.0220185	up	yes
MSTRG.28698	hypothetical protein Celaphus_00007467, partial [Cervus elaphus hippelaphus];ANKRD26, partial [Cervus elaphus hippelaphus]	2.31935	1.21372	0.00172604	0.0220185	up	yes
MSTRG.24872	SELENBP1 [Cervus elaphus hippelaphus]	2.00735	1.00529	0.00174424	0.0221822	up	yes
MSTRG.24249	CLSTN2 [Cervus elaphus hippelaphus]	0.043798	-4.51299	0.00174692	0.0221977	down	yes
MSTRG.6864	KRT19 [Cervus elaphus hippelaphus]	2.56371	1.35824	0.0017524	0.0221988	up	yes
MSTRG.2936	cilia- and flagella-associated protein 54 [Odocoileus virginianus texanus]	3.06777	1.61719	0.00177768	0.0224804	up	yes
MSTRG.14799	hypothetical protein Celaphus_00005962 [Cervus elaphus hippelaphus]	2.19518	1.13434	0.00178317	0.0225391	up	yes
MSTRG.37351	ITGA6, partial [Cervus elaphus hippelaphus];hypothetical protein Celaphus_00015765, partial [Cervus elaphus hippelaphus]	1.99221	0.994371	0.00178743	0.0225713	up	no
MSTRG.33528	hypothetical protein Celaphus_00018748 [Cervus elaphus hippelaphus]	0.240148	-2.05801	0.00179154	0.0226125	down	yes
MSTRG.18952	PPA1 [Cervus elaphus hippelaphus]	0.255839	-1.96669	0.00179654	0.0226647	down	yes
MSTRG.13486	hypothetical protein Celaphus_00005365 [Cervus elaphus hippelaphus]	2.12692	1.08876	0.00180554	0.0227624	up	yes
MSTRG.9878	MAP2, partial [Cervus elaphus hippelaphus]	2.75489	1.46199	0.00180629	0.0227624	up	yes
MSTRG.26002	hypothetical protein Celaphus_00002643 [Cervus elaphus hippelaphus]	1.84907	0.8868	0.00180687	0.0227624	up	no
MSTRG.34219	HMG2B, partial [Homo sapiens]	0.285307	-1.80941	0.00181613	0.0228682	down	yes
MSTRG.38081	dedicator of cytokinesis protein 11 isoform X1 [Bos indicus x Bos taurus]	2.43322	1.28287	0.00182542	0.0229619	up	yes
MSTRG.4810	PIK3IP1, partial [Cervus elaphus hippelaphus]	2.26209	1.17766	0.00182705	0.0229619	up	yes
MSTRG.37554	GPD2 [Cervus elaphus hippelaphus]	0.274938	-1.86282	0.00182882	0.0229624	down	yes
MSTRG.17174	hypothetical protein Celaphus_00015462 [Cervus elaphus hippelaphus]	0.245003	-2.02913	0.00185936	0.0232684	down	yes
MSTRG.6219	hypothetical protein Celaphus_00000821 [Cervus elaphus hippelaphus]	0.271304	-1.88202	0.00187151	0.0233762	down	yes
MSTRG.25668	DNAJC6 [Cervus elaphus hippelaphus]	4.21275	2.07476	0.00187514	0.0234105	up	yes
MSTRG.16052	NFATC4, partial [Cervus elaphus hippelaphus]	0.225505	-2.14877	0.00189093	0.0235408	down	yes
MSTRG.18456	HMCN1, partial [Cervus elaphus hippelaphus]	2.24312	1.16551	0.00189832	0.0236217	up	yes
MSTRG.3698	hypothetical protein Celaphus_00004275 [Cervus elaphus hippelaphus]	2.54667	1.34861	0.00190909	0.0237223	up	yes
MSTRG.2482	PFKM [Cervus elaphus hippelaphus]	1.85321	0.890023	0.00191331	0.0237504	up	no
MSTRG.27477	hypothetical protein Celaphus_00013638 [Cervus elaphus hippelaphus]	2.18235	1.12588	0.00191413	0.0237504	up	yes
MSTRG.12763	hypothetical protein Celaphus_00007390 [Cervus elaphus hippelaphus];hypothetical protein Celaphus_00007391 [Cervus elaphus hippelaphus]	1.95815	0.969489	0.00191453	0.0237504	up	no
MSTRG.31895	hypothetical protein Celaphus_00018139 [Cervus elaphus hippelaphus]	2.06439	1.04572	0.00194825	0.0240731	up	yes
MSTRG.1666	hypothetical protein Celaphus_00013525, partial [Cervus elaphus hippelaphus]	2.04311	1.03077	0.00195611	0.0241589	up	yes
MSTRG.11233	SLC26A2 [Cervus elaphus hippelaphus]	2.1457	1.10145	0.00198921	0.0245155	up	yes
MSTRG.24290	PLS1, partial [Cervus elaphus hippelaphus]	3.6595	1.87165	0.00200357	0.0245971	up	yes
MSTRG.31108	unnamed protein product [Gulo gulo];hypothetical protein Celaphus_00017895 [Cervus elaphus hippelaphus]	2.28751	1.19378	0.00200369	0.0245971	up	yes
MSTRG.39355	SCML2, partial [Cervus elaphus hippelaphus]	2.60745	1.38264	0.00201203	0.0246651	up	yes
MSTRG.9233	hypothetical protein Celaphus_00014709 [Cervus elaphus hippelaphus]	2.06813	1.04833	0.00201616	0.02467	up	yes
MSTRG.15578	TPM1 protein, partial [Homo sapiens];hypothetical protein Celaphus_00006251 [Cervus elaphus hippelaphus];TPA: sarcomeric tropomyosin kappa-like [Bos taurus]	0.290057	-1.78559	0.00203672	0.0248754	down	yes
MSTRG.29121	hypothetical protein Celaphus_00007609 [Cervus elaphus hippelaphus];hypothetical protein Celaphus_00007610 [Cervus elaphus hippelaphus]	2.87629	1.52421	0.0020462	0.0249451	up	yes
MSTRG.11210	AFAP1L1 [Cervus elaphus hippelaphus]	2.00784	1.00564	0.00204949	0.0249623	up	yes
MSTRG.27760	hypothetical protein Celaphus_00013840 [Cervus elaphus hippelaphus];hypothetical protein Celaphus_00013841 [Cervus elaphus hippelaphus]	0.277027	-1.8519	0.00205581	0.0250162	down	yes
MSTRG.33070	TUBB6 [Cervus elaphus hippelaphus]	0.258929	-1.94937	0.00206559	0.0251005	down	yes
MSTRG.5330	hypothetical protein Celaphus_00000422 [Cervus elaphus hippelaphus]	0.30126	-1.73092	0.00209275	0.0253722	down	yes
MSTRG.14797	hypothetical protein Celaphus_00005961, partial [Cervus elaphus hippelaphus]	1.98195	0.986918	0.00209634	0.0253924	up	no
MSTRG.25665	PDE4B [Cervus elaphus hippelaphus]	1.88717	0.916221	0.00210844	0.0255273	up	no
MSTRG.16705	hypothetical protein Celaphus_00015242 [Cervus elaphus hippelaphus]	1.94776	0.961813	0.00212165	0.0256637	up	no
MSTRG.3123	hypothetical protein Celaphus_00003948, partial [Cervus elaphus hippelaphus]	2.07111	1.0504	0.00212387	0.0256789	up	yes
gene-Celaphus_00004459	PREDICTED: zinc finger protein neuro-d4 isoform X4 [Capra hircus]	0.196244	-2.34928	0.00213359	0.0257609	down	yes
MSTRG.12911	CARD9 [Cervus elaphus hippelaphus]	5.90627	2.56225	0.00214482	0.0258729	up	yes
MSTRG.2090	hypothetical protein Celaphus_00011326, partial [Cervus elaphus hippelaphus];hypothetical protein Celaphus_00011325 [Cervus elaphus hippelaphus]	0.263545	-1.92388	0.00218299	0.0262973	down	yes
MSTRG.12372	KCTD7 [Cervus elaphus hippelaphus]	2.07268	1.0515	0.00218746	0.0263392	up	yes
MSTRG.11274	SLC36A2, partial [Cervus elaphus hippelaphus]	3.27855	1.71306	0.00219178	0.0263672	up	yes
MSTRG.10258	hypothetical protein Celaphus_00003096 [Cervus elaphus hippelaphus]	1.74505	0.803268	0.00219588	0.0264045	up	no
MSTRG.17517	hypothetical protein Celaphus_00015591 [Cervus elaphus hippelaphus]	3.7484	1.90628	0.00220484	0.0264761	up	yes
MSTRG.26817	GGH, partial [Cervus elaphus hippelaphus]	3.40397	1.76722	0.00221198	0.0265137	up	yes
MSTRG.5092	hypothetical protein Celaphus_00000275 [Cervus elaphus hippelaphus]	3.93167	1.97514	0.00221381	0.0265236	up	yes
MSTRG.3374	hypothetical protein Celaphus_00004051 [Cervus elaphus hippelaphus]	3.15789	1.65896	0.0022374	0.0267335	up	yes
MSTRG.6683	phosphoethanolamine/phosphocholine phosphatase isoform X5 [Odocoileus virginianus texanus]	1.97758	0.983737	0.00223851	0.0267346	up	no
MSTRG.32832	beta-1,4-galactosyltransferase 6 [Bos taurus]	2.85912	1.51557	0.00225079	0.026845	up	yes
MSTRG.16927	ISLR [Cervus elaphus hippelaphus]	2.92565	1.54876	0.00227114	0.0270023	up	yes
gene-Celaphus_00019143	hypothetical protein Celaphus_00019143 [Cervus elaphus hippelaphus]	2.92505	1.54846	0.00228015	0.0270826	up	yes
MSTRG.2307	hypothetical protein Celaphus_00011381 [Cervus elaphus hippelaphus];hypothetical protein Celaphus_00011380, partial [Cervus elaphus hippelaphus];NR2C1 [Cervus elaphus hippelaphus]	1.86479	0.89901	0.0023159	0.0273688	up	no
MSTRG.27045	transmembrane protein 74 [Odocoileus virginianus texanus]	5.49398	2.45785	0.00232999	0.0274796	up	yes
MSTRG.26976	HEY1 [Cervus elaphus hippelaphus]	1.94908	0.962793	0.00235621	0.0276809	up	no
MSTRG.1401	CDC42EP2 [Cervus elaphus hippelaphus]	2.19212	1.13233	0.00237012	0.0277746	up	yes
MSTRG.24832	PREDICTED: protein S100-A2 isoform X1 [Mustela putorius furo];PREDICTED: protein S100-A16 isoform X1 [Mustela putorius furo]	1.86273	0.897419	0.00237158	0.0277746	up	no
MSTRG.24161	hypothetical protein Celaphus_00012943 [Cervus elaphus hippelaphus]	2.42985	1.28087	0.00237569	0.0278076	up	yes
MSTRG.1370	EGF-containing fibulin-like extracellular matrix protein 2 [Odocoileus virginianus texanus]	1.87004	0.903068	0.00238689	0.0278769	up	no
MSTRG.24903	PREDICTED: ADAMTS-like protein 4 isoform X1 [Capra hircus]	1.74183	0.800604	0.00240898	0.0280853	up	no
MSTRG.24913	CTSS, partial [Cervus elaphus hippelaphus]	2.2419	1.16472	0.00243413	0.0283286	up	yes
MSTRG.35466	hypothetical protein Celaphus_00016659, partial [Cervus elaphus hippelaphus]	2.44009	1.28694	0.0024613	0.0285567	up	yes
MSTRG.20602	DAPK1, partial [Cervus elaphus hippelaphus]	1.87562	0.90737	0.00248024	0.0287386	up	no
MSTRG.33011	hypothetical protein Celaphus_00017708 [Cervus elaphus hippelaphus]	2.00365	1.00263	0.00248918	0.0288062	up	yes
MSTRG.17220	PREDICTED: legumain [Bos mutus]	1.84106	0.880534	0.00249922	0.0288826	up	no
MSTRG.13856	IL1RN, partial [Cervus elaphus hippelaphus]	5.8139	2.53951	0.00252069	0.0290733	up	yes
MSTRG.1187	insulin-like growth factor 2 isoform 3 [Cervus nippon]	1.99491	0.996321	0.00252123	0.0290733	up	no
MSTRG.13051	PKN3 [Cervus elaphus hippelaphus]	1.76919	0.823089	0.00252574	0.0291126	up	no
MSTRG.20396	hypothetical protein Celaphus_00016957, partial [Cervus elaphus hippelaphus]	1.7634	0.818359	0.00252813	0.0291148	up	no
MSTRG.10138	hypothetical protein Celaphus_00003012, partial [Cervus elaphus hippelaphus]	3.76289	1.91184	0.00253545	0.0291863	up	yes
MSTRG.11246	CD74 [Cervus elaphus hippelaphus]	2.40744	1.2675	0.00254237	0.0292279	up	yes
MSTRG.27932	LPCAT3 [Cervus elaphus hippelaphus]	0.270159	-1.88812	0.002544	0.0292339	down	yes
MSTRG.13335	KLF11, partial [Cervus elaphus hippelaphus]	2.39682	1.26112	0.00254519	0.0292348	up	yes
MSTRG.16377	TRIM36 [Cervus elaphus hippelaphus]	2.58425	1.36975	0.00257662	0.0295317	up	yes
MSTRG.30594	PRKCD [Cervus elaphus hippelaphus]	1.76577	0.820298	0.00258109	0.0295397	up	no
MSTRG.10920	hypothetical protein Celaphus_00003536 [Cervus elaphus hippelaphus]	0.168457	-2.56955	0.00258179	0.0295397	down	yes
MSTRG.28746	NRP1 [Cervus elaphus hippelaphus];NRP1, partial [Cervus elaphus hippelaphus]	1.92727	0.946559	0.00259297	0.0296292	up	no
MSTRG.23021	hypothetical protein Celaphus_00012309 [Cervus elaphus hippelaphus];hypothetical protein Celaphus_00012310 [Cervus elaphus hippelaphus]	2.03369	1.0241	0.00259916	0.0296486	up	yes
MSTRG.14753	TSHR [Cervus elaphus hippelaphus]	0.120285	-3.05547	0.00262227	0.0298735	down	yes
MSTRG.18001	hypothetical protein Celaphus_00010937 [Cervus elaphus hippelaphus]	0.0822979	-3.603	0.00263434	0.0299594	down	yes
gene-Celaphus_00000968	tumor necrosis factor ligand superfamily member 13 [Dasypus novemcinctus]	2.55314	1.35228	0.00265282	0.0301048	up	yes
MSTRG.25807	LRP8 [Cervus elaphus hippelaphus]	0.294449	-1.76391	0.00268227	0.0303725	down	yes
gene-Celaphus_00017014	hypothetical protein Celaphus_00017014, partial [Cervus elaphus hippelaphus]	3.04296	1.60548	0.00268462	0.0303744	up	yes
MSTRG.11795	hypothetical protein Celaphus_00006749 [Cervus elaphus hippelaphus]	1.88458	0.914242	0.00269365	0.0304635	up	no
MSTRG.37396	hypothetical protein Celaphus_00015783 [Cervus elaphus hippelaphus]	0.0815142	-3.6168	0.00269675	0.0304855	down	yes
MSTRG.17159	hypothetical protein Celaphus_00015454 [Cervus elaphus hippelaphus]	0.295509	-1.75873	0.00272719	0.0307639	down	yes
MSTRG.17724	HLX, partial [Cervus elaphus hippelaphus]	2.09439	1.06653	0.00273285	0.0308145	up	yes
MSTRG.4971	hypothetical protein Celaphus_00000189, partial [Cervus elaphus hippelaphus];hypothetical protein Celaphus_00000190, partial [Cervus elaphus hippelaphus]	2.2152	1.14744	0.00275391	0.0310122	up	yes
MSTRG.11838	hypothetical protein Celaphus_00006791 [Cervus elaphus hippelaphus]	0.273148	-1.87225	0.0027604	0.0310721	down	yes
MSTRG.31110	MSX2 [Cervus elaphus hippelaphus]	0.228201	-2.13162	0.0027912	0.0313654	down	yes
MSTRG.32639	hypothetical protein Celaphus_00017546 [Cervus elaphus hippelaphus]	2.91047	1.54125	0.00279477	0.0313922	up	yes
MSTRG.16502	hypothetical protein Celaphus_00015155 [Cervus elaphus hippelaphus];hypothetical protein Celaphus_00015153 [Cervus elaphus hippelaphus];hypothetical protein Celaphus_00015152 [Cervus elaphus hippelaphus];hypothetical protein Celaphus_00015154 [Cervus elaphus hippelaphus]	1.71221	0.77586	0.00280991	0.0314953	up	no
MSTRG.3372	CYBA [Cervus elaphus hippelaphus]	1.74577	0.803867	0.00281871	0.0315805	up	no
MSTRG.21803	hypothetical protein Celaphus_00011893, partial [Cervus elaphus hippelaphus]	2.33971	1.22633	0.00282125	0.0315823	up	yes
MSTRG.16138	PIAS1 [Cervus elaphus hippelaphus]	1.90539	0.930084	0.00282573	0.0316189	up	no
MSTRG.10706	GRAMD3, partial [Cervus elaphus hippelaphus]	1.99812	0.99864	0.00283199	0.0316355	up	no
MSTRG.4706	claudin-5 [Ovis aries]	2.36297	1.2406	0.00283654	0.0316596	up	yes
MSTRG.30868	PPARG [Cervus elaphus hippelaphus]	2.86388	1.51797	0.00284159	0.0317025	up	yes
MSTRG.11837	RAB26 [Cervus elaphus hippelaphus]	0.243658	-2.03707	0.00286487	0.0319196	down	yes
MSTRG.5049	hypothetical protein Celaphus_00000243 [Cervus elaphus hippelaphus]	1.8867	0.915865	0.00287527	0.0319838	up	no
MSTRG.648	stromal interaction molecule 1 isoform X3 [Odocoileus virginianus texanus]	1.82416	0.867232	0.00288074	0.0320311	up	no
MSTRG.29757	CTSA [Cervus elaphus hippelaphus]	1.8432	0.882212	0.00289287	0.032112	up	no
MSTRG.20307	High affinity copper uptake protein 1, partial [Bos mutus]	2.1489	1.1036	0.0029117	0.0322667	up	yes
MSTRG.6578	hypothetical protein Celaphus_00001107, partial [Cervus elaphus hippelaphus]	1.85864	0.894243	0.00291366	0.032272	up	no
MSTRG.35447	TNFRSF19 [Cervus elaphus hippelaphus]	0.275741	-1.85861	0.00291462	0.032272	down	yes
MSTRG.19496	pantothenate kinase 1 isoform X1 [Bos taurus]	2.24461	1.16647	0.00292783	0.0324048	up	yes
MSTRG.25592	hypothetical protein Celaphus_00002409, partial [Cervus elaphus hippelaphus]	2.48911	1.31563	0.0029411	0.032538	up	yes
MSTRG.38857	AR, partial [Cervus elaphus hippelaphus];AR [Cervus elaphus hippelaphus]	0.144951	-2.78637	0.00299481	0.0330492	down	yes
MSTRG.1531	hypothetical protein Celaphus_00013391 [Cervus elaphus hippelaphus];ASRGL1 [Cervus elaphus hippelaphus]	1.87371	0.905898	0.00300923	0.0331667	up	no
MSTRG.37155	HS6ST1 [Cervus elaphus hippelaphus]	1.75109	0.808256	0.00302019	0.0332598	up	no
gene-Celaphus_00000126	SEC14L4 [Cervus elaphus hippelaphus]	5.38041	2.42772	0.00302636	0.0333139	up	yes
MSTRG.3526	hypothetical protein PAL_GLEAN10011060 [Pteropus alecto]	0.218175	-2.19644	0.00306239	0.0336684	down	yes
MSTRG.25637	hypothetical protein Celaphus_00002435 [Cervus elaphus hippelaphus]	0.300806	-1.73309	0.00307757	0.0337791	down	yes
MSTRG.33195	SKA1 [Cervus elaphus hippelaphus]	0.27146	-1.88119	0.00312583	0.0342377	down	yes
MSTRG.15777	DNAJC17 [Cervus elaphus hippelaphus]	1.92685	0.946246	0.00314978	0.0344091	up	no
MSTRG.15895	hypothetical protein Celaphus_00006413 [Cervus elaphus hippelaphus]	0.32131	-1.63796	0.00315067	0.0344091	down	yes
MSTRG.698	P2RY2 [Cervus elaphus hippelaphus]	2.09074	1.06401	0.00315067	0.0344091	up	yes
MSTRG.7547	hypothetical protein Celaphus_00017223 [Cervus elaphus hippelaphus]	1.7363	0.796016	0.00316227	0.034484	up	no
MSTRG.1390	LTBP3 [Cervus elaphus hippelaphus]	1.97143	0.979243	0.0031656	0.0344876	up	no
MSTRG.17978	hypothetical protein Celaphus_00010928, partial [Cervus elaphus hippelaphus]	0.317152	-1.65675	0.00317539	0.0345657	down	yes
MSTRG.15840	hypothetical protein Celaphus_00006405, partial [Cervus elaphus hippelaphus];hypothetical protein Celaphus_00006406, partial [Cervus elaphus hippelaphus]	0.271758	-1.87961	0.00317952	0.0345822	down	yes
MSTRG.24649	hypothetical protein Celaphus_00001807, partial [Cervus elaphus hippelaphus]	0.340207	-1.55552	0.0031957	0.0347296	down	yes
gene-Celaphus_00011040	hypothetical protein Celaphus_00011040 [Cervus elaphus hippelaphus]	8.52821	3.09224	0.0031975	0.0347349	up	yes
MSTRG.8696	NFKBIL1 [Cervus elaphus hippelaphus]	1.86824	0.901678	0.00320463	0.0347749	up	no
MSTRG.10073	kelch-like protein 26 isoform X1 [Ovis aries]	2.263	1.17824	0.00326206	0.0352912	up	yes
MSTRG.19253	hypothetical protein Celaphus_00008375, partial [Cervus elaphus hippelaphus]	2.30156	1.20261	0.00327587	0.0353971	up	yes
MSTRG.11810	MAPK8IP3 [Cervus elaphus hippelaphus]	2.10381	1.07301	0.00329783	0.0355848	up	yes
MSTRG.11256	synaptopodin isoform X1 [Bubalus bubalis]	2.10221	1.07191	0.00329958	0.0355848	up	yes
MSTRG.12467	hypothetical protein Celaphus_00007194 [Cervus elaphus hippelaphus];HIP1, partial [Cervus elaphus hippelaphus]	1.77027	0.823971	0.00330267	0.0355848	up	no
MSTRG.8952	hypothetical protein Celaphus_00014589 [Cervus elaphus hippelaphus]	6.17267	2.6259	0.00332141	0.0357285	up	yes
MSTRG.15465	unnamed protein product [Macaca fascicularis]	25.6076	4.6785	0.00335674	0.036006	up	yes
MSTRG.25426	LRRC8C [Cervus elaphus hippelaphus]	1.94995	0.963436	0.00335915	0.0360172	up	no
MSTRG.6666	PDK2 [Cervus elaphus hippelaphus]	1.73393	0.794042	0.0033712	0.0361171	up	no
MSTRG.33278	hypothetical protein Celaphus_00017801 [Cervus elaphus hippelaphus]	0.148442	-2.75203	0.00339992	0.0363953	down	yes
MSTRG.13979	girdin [Bos taurus];CCDC88A, partial [Cervus elaphus hippelaphus]	1.92847	0.947453	0.00340918	0.0364501	up	no
MSTRG.19581	SLC35G1, partial [Cervus elaphus hippelaphus]	1.97831	0.984271	0.00341337	0.0364576	up	no
MSTRG.19483	PREDICTED: actin, aortic smooth muscle [Bos indicus]	0.1606	-2.63845	0.00343976	0.0365994	down	yes
MSTRG.16769	CTSH [Cervus elaphus hippelaphus]	1.7495	0.806945	0.00345004	0.0366501	up	no
MSTRG.9684	CAB39 [Cervus elaphus hippelaphus]	2.21832	1.14947	0.003509	0.0372013	up	yes
MSTRG.9491	FAM46B [Cervus elaphus hippelaphus]	3.4717	1.79564	0.00351267	0.0372253	up	yes
MSTRG.19747	NFKB2 [Cervus elaphus hippelaphus]	1.70243	0.767592	0.00354545	0.0374975	up	no
MSTRG.30605	hypothetical protein Celaphus_00010460 [Cervus elaphus hippelaphus]	0.319039	-1.6482	0.00354977	0.0375144	down	yes
MSTRG.3000	HSP90B1, partial [Cervus elaphus hippelaphus]	0.320137	-1.64324	0.00355642	0.0375534	down	yes
MSTRG.16000	hypothetical protein Celaphus_00006495 [Cervus elaphus hippelaphus]	2.14799	1.10299	0.00356723	0.0376016	up	yes
MSTRG.11166	rho GTPase-activating protein 26 isoform X4 [Homo sapiens]	2.17647	1.12199	0.00357336	0.0376271	up	yes
MSTRG.10125	PLVAP, partial [Cervus elaphus hippelaphus]	1.87784	0.909071	0.00358233	0.0376915	up	no
MSTRG.22624	tensin-3-like, partial [Odocoileus virginianus texanus];hypothetical protein Celaphus_00012132 [Cervus elaphus hippelaphus]	1.89881	0.925094	0.00359323	0.0377898	up	no
MSTRG.10355	hypothetical protein Celaphus_00003181 [Cervus elaphus hippelaphus]	3.09517	1.63002	0.00359453	0.0377898	up	yes
MSTRG.25795	TCEANC2 [Cervus elaphus hippelaphus]	1.84344	0.882397	0.00360792	0.0378703	up	no
MSTRG.34829	hypothetical protein Celaphus_00018420 [Cervus elaphus hippelaphus]	0.248206	-2.01039	0.00361237	0.0378923	down	yes
MSTRG.35896	TMCO3 [Cervus elaphus hippelaphus]	1.66719	0.73742	0.00364536	0.0381723	up	no
MSTRG.6551	GRAP [Cervus elaphus hippelaphus]	2.03271	1.02341	0.00366283	0.03834	up	yes
MSTRG.23927	BTD, partial [Cervus elaphus hippelaphus]	1.81432	0.85943	0.00372764	0.0388952	up	no
MSTRG.18227	EFHD2 [Cervus elaphus hippelaphus]	1.9983	0.99877	0.00374327	0.0390022	up	no
MSTRG.6780	hypothetical protein Celaphus_00001230 [Cervus elaphus hippelaphus]	0.22904	-2.12633	0.00374527	0.0390022	down	yes
MSTRG.33338	hypothetical protein Celaphus_00017823, partial [Cervus elaphus hippelaphus]	2.17923	1.12382	0.00374997	0.0390166	up	yes
MSTRG.37326	hypothetical protein Celaphus_00015752, partial [Cervus elaphus hippelaphus]	1.90777	0.931889	0.00375042	0.0390166	up	no
MSTRG.9164	hypothetical protein Celaphus_00014665 [Cervus elaphus hippelaphus]	0.20102	-2.31459	0.00375276	0.0390166	down	yes
MSTRG.11975	EMP2 [Cervus elaphus hippelaphus]	1.76806	0.822167	0.00375552	0.0390166	up	no
MSTRG.10027	hypothetical protein Celaphus_00002913, partial [Cervus elaphus hippelaphus]	1.91577	0.937927	0.00377691	0.0392159	up	no
MSTRG.29883	KCNG1 [Cervus elaphus hippelaphus]	0.210434	-2.24856	0.00378511	0.0392469	down	yes
MSTRG.25366	BCAR3 [Cervus elaphus hippelaphus]	1.60084	0.678825	0.00378759	0.0392572	up	no
MSTRG.29764	CD40 [Cervus elaphus hippelaphus]	1.98144	0.986549	0.00384482	0.0397725	up	no
MSTRG.38828	STARD8, partial [Cervus elaphus hippelaphus]	1.69199	0.758724	0.00392144	0.0404542	up	no
MSTRG.30629	hypothetical protein Celaphus_00010477, partial [Cervus elaphus hippelaphus]	1.67068	0.740437	0.00396411	0.0408625	up	no
MSTRG.16416	DCP2 [Cervus elaphus hippelaphus]	0.31645	-1.65995	0.00396833	0.0408901	down	yes
MSTRG.5608	mothers against decapentaplegic homolog 1 isoform X2 [Bubalus bubalis]	0.309988	-1.68972	0.00397303	0.0409225	down	yes
MSTRG.28587	ANKRD26 [Cervus elaphus hippelaphus]	3.03689	1.60259	0.00399078	0.0410532	up	yes
MSTRG.11666	NUDT12 [Cervus elaphus hippelaphus]	2.65258	1.40739	0.00400866	0.0411789	up	yes
MSTRG.11030	FBXL21 [Cervus elaphus hippelaphus]	0.337263	-1.56806	0.00401115	0.0411789	down	yes
MSTRG.781	protein Wnt-11 [Physeter catodon]	3.61741	1.85496	0.00401181	0.0411789	up	yes
MSTRG.2982	PMCH [Cervus elaphus hippelaphus]	0.164891	-2.60042	0.00401551	0.0411938	down	yes
gene-Celaphus_00006632	CMYA5, partial [Cervus elaphus hippelaphus]	0.286729	-1.80224	0.00401651	0.0411938	down	yes
MSTRG.7898	hypothetical protein Celaphus_00017367, partial [Cervus elaphus hippelaphus]	2.08239	1.05824	0.0040286	0.0412551	up	yes
MSTRG.6849	hypothetical protein Celaphus_00001287 [Cervus elaphus hippelaphus]	0.314576	-1.66852	0.00403193	0.0412719	down	yes
MSTRG.32732	SERPINB2 [Cervus elaphus hippelaphus]	0.186702	-2.42119	0.00403364	0.0412734	down	yes
MSTRG.32005	STX7, partial [Cervus elaphus hippelaphus]	1.97966	0.985252	0.00404852	0.0413616	up	no
MSTRG.7140	fatty acid synthase isoform X1 [Odocoileus virginianus texanus]	0.309621	-1.69143	0.00406889	0.0415199	down	yes
MSTRG.38604	CHRDL1 [Cervus elaphus hippelaphus]	0.201687	-2.30981	0.00409529	0.0417265	down	yes
MSTRG.6488	hypothetical protein Celaphus_00001046 [Cervus elaphus hippelaphus]	3.85038	1.945	0.00411929	0.0419226	up	yes
MSTRG.20972	hypothetical protein Celaphus_00018484 [Cervus elaphus hippelaphus]	1.91171	0.934867	0.00412629	0.0419615	up	no
gene-Celaphus_00009515	SASH3 [Cervus elaphus hippelaphus]	2.90858	1.54032	0.00413584	0.0420159	up	yes
MSTRG.39424	MOSPD2, partial [Cervus elaphus hippelaphus]	2.32261	1.21574	0.00413641	0.0420159	up	yes
MSTRG.34738	hypothetical protein Celaphus_00018383, partial [Cervus elaphus hippelaphus];protein prune homolog 2 isoform X1 [Odocoileus virginianus texanus];hypothetical protein Celaphus_00018384, partial [Cervus elaphus hippelaphus]	0.264501	-1.91865	0.00414207	0.0420572	down	yes
MSTRG.8718	flotillin-1, partial [Mus musculus]	1.70701	0.771473	0.00415711	0.0421937	up	no
MSTRG.7776	hypothetical protein Celaphus_00017325, partial [Cervus elaphus hippelaphus]	1.85555	0.891848	0.00416529	0.0422605	up	no
MSTRG.32808	hypothetical protein Celaphus_00017616, partial [Cervus elaphus hippelaphus];dystrobrevin alpha isoform X23 [Equus caballus];hypothetical protein Celaphus_00017617 [Cervus elaphus hippelaphus]	0.248246	-2.01016	0.00417047	0.0422968	down	yes
MSTRG.18646	EGLN1, partial [Cervus elaphus hippelaphus];EGLN1 [Cervus elaphus hippelaphus]	1.99638	0.997384	0.00421732	0.042641	up	no
MSTRG.8661	PPT2, partial [Cervus elaphus hippelaphus]	1.70094	0.766329	0.00422538	0.0427026	up	no
MSTRG.3959	RASGRP4 [Cervus elaphus hippelaphus]	8.70136	3.12124	0.00423807	0.0428017	up	yes
MSTRG.18449	HMCN1 [Cervus elaphus hippelaphus];HMCN1, partial [Cervus elaphus hippelaphus]	2.16323	1.11319	0.00424782	0.0428735	up	yes
MSTRG.36465	ATP6V1A, partial [Cervus elaphus hippelaphus]	2.19501	1.13423	0.00426069	0.0429809	up	yes
MSTRG.1620	hypothetical protein Celaphus_00013486 [Cervus elaphus hippelaphus];hypothetical protein Celaphus_00013487 [Cervus elaphus hippelaphus]	1.8035	0.850801	0.00427872	0.043097	up	no
MSTRG.23944	ETS2 [Cervus elaphus hippelaphus]	2.02841	1.02035	0.00428326	0.0431263	up	yes
MSTRG.11528	hypothetical protein Celaphus_00003874 [Cervus elaphus hippelaphus]	0.245613	-2.02554	0.00428929	0.0431706	down	yes
MSTRG.24834	protein S100-A13 isoform X1 [Desmodus rotundus]	1.69112	0.75798	0.00432346	0.0434483	up	no
MSTRG.2496	TMEM106C [Cervus elaphus hippelaphus]	1.74778	0.805523	0.00433436	0.0435248	up	no
MSTRG.35373	ubiquitin-like protein 3 isoform a precursor [Mus musculus]	1.97736	0.983576	0.00435809	0.04368	up	no
MSTRG.27940	CD163, partial [Cervus elaphus hippelaphus]	2.09145	1.0645	0.00437533	0.0438362	up	yes
MSTRG.16721	hypothetical protein TREES_T100019494 [Tupaia chinensis]	1.82417	0.867241	0.0043804	0.0438704	up	no
MSTRG.29100	hypothetical protein Celaphus_00007596 [Cervus elaphus hippelaphus]	0.286629	-1.80274	0.00438287	0.0438785	down	yes
MSTRG.14171	PKDCC [Cervus elaphus hippelaphus]	0.307257	-1.70248	0.00440237	0.043994	down	yes
MSTRG.6305	TXNDC17, partial [Cervus elaphus hippelaphus]	1.90987	0.933472	0.00440264	0.043994	up	no
MSTRG.27891	VWF [Cervus elaphus hippelaphus]	2.35918	1.23829	0.00440757	0.0440177	up	yes
MSTRG.10628	IRF1, partial [Cervus elaphus hippelaphus]	2.13877	1.09678	0.00441312	0.0440479	up	yes
MSTRG.10993	hypothetical protein Celaphus_00003589 [Cervus elaphus hippelaphus]	2.01447	1.0104	0.00446253	0.0444236	up	yes
MSTRG.25972	TMEM53 [Cervus elaphus hippelaphus]	1.91483	0.937218	0.00446637	0.0444451	up	no
MSTRG.286	TAGLN, partial [Cervus elaphus hippelaphus]	0.219245	-2.18938	0.00447935	0.0445072	down	yes
MSTRG.15836	hypothetical protein Celaphus_00006404, partial [Cervus elaphus hippelaphus]	0.27739	-1.85001	0.00448369	0.0445336	down	yes
MSTRG.28654	IL2RA [Cervus elaphus hippelaphus]	3.1609	1.66034	0.00450028	0.0446816	up	yes
MSTRG.16678	hypothetical protein Celaphus_00015229, partial [Cervus elaphus hippelaphus]	0.305436	-1.71106	0.00450215	0.0446834	down	yes
MSTRG.12111	PREDICTED: LOW QUALITY PROTEIN: ketimine reductase mu-crystallin [Bos indicus]	0.218101	-2.19693	0.00453249	0.044917	down	yes
MSTRG.3829	CEBPA [Cervus elaphus hippelaphus]	2.70503	1.43565	0.00455685	0.0450234	up	yes
MSTRG.20383	hypothetical protein Celaphus_00016949, partial [Cervus elaphus hippelaphus];hypothetical protein Celaphus_00016950, partial [Cervus elaphus hippelaphus]	1.86016	0.895423	0.00457987	0.0452168	up	no
MSTRG.36183	hypothetical protein Celaphus_00019491 [Cervus elaphus hippelaphus]	0.255969	-1.96596	0.00458558	0.0452396	down	yes
MSTRG.25484	TPA: alpha 1 type XXIV collagen-like [Bos taurus]	1.69904	0.764719	0.00462712	0.0455814	up	no
MSTRG.7781	hypothetical protein Celaphus_00017326, partial [Cervus elaphus hippelaphus]	1.77374	0.826792	0.00463376	0.0456064	up	no
MSTRG.20925	CCNA2 [Cervus elaphus hippelaphus]	0.330231	-1.59845	0.00464	0.0456402	down	yes
MSTRG.7189	hypothetical protein Celaphus_00001535 [Cervus elaphus hippelaphus]	2.02343	1.0168	0.00469431	0.0460886	up	yes
MSTRG.20386	TPA: catenin (cadherin-associated protein), alpha-like 1 [Bos taurus]	2.2323	1.15853	0.00470047	0.046132	up	yes
MSTRG.11162	ARHGAP26, partial [Cervus elaphus hippelaphus]	1.87976	0.910547	0.00471478	0.0462381	up	no
MSTRG.11158	SPRY4, partial [Cervus elaphus hippelaphus]	1.62304	0.6987	0.00473257	0.0462923	up	no
MSTRG.11197	dihydropyrimidinase-related protein 3 [Bos taurus];PREDICTED: dihydropyrimidinase-related protein 3 isoform X1 [Ceratotherium simum simum]	0.298991	-1.74183	0.00476562	0.0465295	down	yes
MSTRG.893	PREDICTED: inactive serine protease PAMR1 [Bos indicus];PAMR1, partial [Cervus elaphus hippelaphus]	1.7705	0.824158	0.00483049	0.0469846	up	no
MSTRG.34504	hypothetical protein Celaphus_00018273, partial [Cervus elaphus hippelaphus]	0.31497	-1.66671	0.00483123	0.0469846	down	yes
MSTRG.14873	ABCD4 [Cervus elaphus hippelaphus];hypothetical protein Celaphus_00005998, partial [Cervus elaphus hippelaphus]	1.71677	0.779696	0.00483737	0.0470215	up	no
MSTRG.22566	SNX10 [Cervus elaphus hippelaphus]	3.41804	1.77317	0.00484435	0.0470539	up	yes
MSTRG.14567	hypothetical protein Celaphus_00005840 [Cervus elaphus hippelaphus]	0.307204	-1.70273	0.00484603	0.0470539	down	yes
gene-Celaphus_00017297	hypothetical protein Celaphus_00017297 [Cervus elaphus hippelaphus]	2.51132	1.32845	0.00486591	0.0472296	up	yes
MSTRG.7028	TANC2, partial [Cervus elaphus hippelaphus]	1.76509	0.81974	0.00487946	0.0473089	up	no
MSTRG.11602	hypothetical protein Celaphus_00003892, partial [Cervus elaphus hippelaphus]	1.8909	0.919076	0.00489902	0.047429	up	no
MSTRG.19208	PLAC9 [Cervus elaphus hippelaphus]	2.05161	1.03675	0.00491202	0.04752	up	yes
MSTRG.34239	CTSB [Cervus elaphus hippelaphus]	1.78587	0.836625	0.00492188	0.0475806	up	no
MSTRG.33175	hypothetical protein Celaphus_00017781, partial [Cervus elaphus hippelaphus]	2.05493	1.03909	0.00493193	0.0476254	up	yes
MSTRG.26903	TPA: hypothetical protein BOS_13943 [Bos taurus]	0.195038	-2.35818	0.00493767	0.0476635	down	yes
MSTRG.28768	NEBL, partial [Cervus elaphus hippelaphus]	3.44257	1.78349	0.00496877	0.0478712	up	yes
MSTRG.30225	hypothetical protein Celaphus_00010282 [Cervus elaphus hippelaphus]	0.285308	-1.80941	0.00497005	0.0478712	down	yes
MSTRG.33492	hypothetical protein Celaphus_00018738 [Cervus elaphus hippelaphus]	1.97336	0.980657	0.00498157	0.0479646	up	no
MSTRG.12253	hypothetical protein Celaphus_00007106 [Cervus elaphus hippelaphus]	1.63941	0.71318	0.0049854	0.0479666	up	no
MSTRG.12530	SERPINE1 [Cervus elaphus hippelaphus]	2.12335	1.08634	0.00500353	0.048071	up	yes
MSTRG.7707	CPZ [Cervus elaphus hippelaphus]	2.34972	1.23249	0.00500689	0.0480858	up	yes
MSTRG.27271	ERICH5 [Cervus elaphus hippelaphus]	0.263714	-1.92295	0.00502788	0.0482698	down	yes
MSTRG.36287	COL8A1 [Cervus elaphus hippelaphus]	0.296764	-1.75261	0.00506621	0.0485605	down	yes
MSTRG.26812	hypothetical protein Celaphus_00016275 [Cervus elaphus hippelaphus]	1.74299	0.801565	0.00509557	0.0487074	up	no
MSTRG.15976	hypothetical protein Celaphus_00006466 [Cervus elaphus hippelaphus]	2.84894	1.51043	0.00514315	0.0490912	up	yes
MSTRG.7877	hypothetical protein Celaphus_00017361, partial [Cervus elaphus hippelaphus]	0.197463	-2.34034	0.0051524	0.0491617	down	yes
MSTRG.28856	SUV39H2 [Cervus elaphus hippelaphus]	0.255035	-1.97123	0.00517085	0.0493128	down	yes
MSTRG.22492	AQP1 [Cervus elaphus hippelaphus]	2.39616	1.26072	0.00517196	0.0493128	up	yes
MSTRG.17798	EPHX1 [Cervus elaphus hippelaphus]	1.70219	0.76739	0.00520804	0.0495852	up	no
MSTRG.18383	ral guanine nucleotide dissociation stimulator-like 1, partial [Odocoileus virginianus texanus]	1.65414	0.726081	0.00522849	0.0497241	up	no
MSTRG.31212	PREDICTED: E3 ubiquitin-protein ligase TRIM23 isoform X2 [Tursiops truncatus]	2.00113	1.00081	0.00526916	0.0499802	up	yes
MSTRG.31321	hypothetical protein Celaphus_00017966, partial [Cervus elaphus hippelaphus]	0.321287	-1.63806	0.00527005	0.0499802	down	yes
MSTRG.2964	GAS2-like protein 3 isoform X4 [Odocoileus virginianus texanus]	0.326654	-1.61417	0.00527569	0.0500131	down	yes
MSTRG.9472	hypothetical protein Celaphus_00014818 [Cervus elaphus hippelaphus]	1.68724	0.754661	0.00527759	0.0500131	up	no
MSTRG.28900	PTER [Cervus elaphus hippelaphus]	2.37852	1.25006	0.00529829	0.0501733	up	yes
gene-Celaphus_00017521	magnesium transporter NIPA3 [Odocoileus virginianus texanus]	0.264804	-1.917	0.00532582	0.0503979	down	yes
MSTRG.30331	PREDICTED: class E basic helix-loop-helix protein 40 [Camelus dromedarius]	0.327396	-1.61089	0.00534567	0.0504773	down	yes
MSTRG.16704	ZNF592 [Cervus elaphus hippelaphus];hypothetical protein Celaphus_00015241 [Cervus elaphus hippelaphus]	1.63976	0.713484	0.00536379	0.0506123	up	no
MSTRG.10845	PDLIM7, partial [Cervus elaphus hippelaphus]	0.274883	-1.86311	0.00538224	0.050732	down	yes
MSTRG.9810	PNKD [Cervus elaphus hippelaphus]	1.64914	0.721716	0.00540387	0.0508718	up	no
MSTRG.34843	RECK, partial [Cervus elaphus hippelaphus]	1.84756	0.885618	0.00540611	0.0508718	up	no
MSTRG.18541	hypothetical protein Celaphus_00011272 [Cervus elaphus hippelaphus]	1.88146	0.911851	0.00548505	0.0514991	up	no
MSTRG.32741	LOW QUALITY PROTEIN: ankyrin repeat and death domain-containing protein 1B [Ovis aries]	2.64833	1.40508	0.00549552	0.0515607	up	yes
MSTRG.11871	tumor necrosis factor receptor superfamily member 12A isoform 2 [Bos taurus]	0.321736	-1.63605	0.00553278	0.0518184	down	yes
MSTRG.2804	hypothetical protein Celaphus_00011672 [Cervus elaphus hippelaphus]	2.0599	1.04257	0.00555772	0.052015	up	yes
MSTRG.1160	hypothetical protein Celaphus_00013105 [Cervus elaphus hippelaphus]	1.75822	0.814117	0.00560096	0.0523259	up	no
MSTRG.10209	hypothetical protein Celaphus_00003062 [Cervus elaphus hippelaphus];EPHX3 [Cervus elaphus hippelaphus]	1.77714	0.829554	0.00561928	0.0524057	up	no
MSTRG.8296	GCLC [Cervus elaphus hippelaphus]	1.90702	0.931319	0.00563288	0.0524954	up	no
MSTRG.19714	semaphorin-4G [Odocoileus virginianus texanus]	1.87898	0.909946	0.00568559	0.0528934	up	no
MSTRG.22135	DNAJC2, partial [Cervus elaphus hippelaphus]	0.290979	-1.78101	0.00568776	0.052895	down	yes
MSTRG.6348	BCL6B [Cervus elaphus hippelaphus]	1.71148	0.775242	0.00571826	0.0530971	up	no
MSTRG.19993	hypothetical protein Celaphus_00008751, partial [Cervus elaphus hippelaphus];hypothetical protein Celaphus_00008750 [Cervus elaphus hippelaphus]	1.60964	0.686734	0.00572554	0.0531342	up	no
MSTRG.29088	hypothetical protein Celaphus_00007590 [Cervus elaphus hippelaphus]	1.7876	0.838026	0.00573395	0.053187	up	no
MSTRG.46	MMP3 [Cervus elaphus hippelaphus]	3.00284	1.58633	0.00575285	0.0533127	up	yes
MSTRG.35903	RASA3, partial [Cervus elaphus hippelaphus]	1.83162	0.873122	0.00576077	0.0533587	up	no
MSTRG.26941	JPH1 [Cervus elaphus hippelaphus]	1.83987	0.879607	0.00576185	0.0533587	up	no
MSTRG.15925	THBS1 [Cervus elaphus hippelaphus]	1.72371	0.785514	0.00576436	0.0533633	up	no
MSTRG.2507	SLC38A2 [Cervus elaphus hippelaphus]	2.17024	1.11786	0.00577881	0.0534408	up	yes
MSTRG.26935	hypothetical protein Celaphus_00016314 [Cervus elaphus hippelaphus]	0.139641	-2.84021	0.00580384	0.0536168	down	yes
MSTRG.37689	HNMT, partial [Cervus elaphus hippelaphus]	2.17813	1.12309	0.00582211	0.0537285	up	yes
MSTRG.25327	unnamed protein product [Xenopus laevis]	2.09682	1.0682	0.00586567	0.0539234	up	yes
MSTRG.24906	protein prune homolog isoform X1 [Odocoileus virginianus texanus]	1.6511	0.723424	0.00596099	0.0545908	up	no
MSTRG.18019	FBXO44 [Cervus elaphus hippelaphus]	2.1079	1.07581	0.00597762	0.0547145	up	yes
MSTRG.34906	TBC1D2, partial [Cervus elaphus hippelaphus]	2.30703	1.20603	0.00599474	0.0548049	up	yes
MSTRG.5374	hypothetical protein Celaphus_00000456 [Cervus elaphus hippelaphus]	1.57781	0.657927	0.00599474	0.0548049	up	no
MSTRG.21975	cell division cycle-associated 7-like protein isoform X3 [Ovis aries]	0.299066	-1.74146	0.00605944	0.0553008	down	yes
MSTRG.10448	C3 [Cervus elaphus hippelaphus]	3.47835	1.7984	0.00608103	0.0554595	up	yes
MSTRG.2271	NUDT4 [Cervus elaphus hippelaphus]	2.03321	1.02376	0.00608541	0.0554618	up	yes
MSTRG.9812	PREDICTED: probable hydrolase PNKD isoform X1 [Odobenus rosmarus divergens]	1.74023	0.799276	0.00612508	0.0557458	up	no
MSTRG.19000	DNA damage-inducible transcript 4 protein-like protein [Camelus ferus]	1.88537	0.914849	0.00614816	0.0558789	up	no
MSTRG.22908	PTN, partial [Cervus elaphus hippelaphus]	0.249228	-2.00446	0.00615279	0.0558826	down	yes
MSTRG.11360	hypothetical protein Celaphus_00003810 [Cervus elaphus hippelaphus]	1.68012	0.748565	0.00615508	0.0558841	up	no
MSTRG.33980	OSTM1, partial [Cervus elaphus hippelaphus]	2.26599	1.18014	0.0061767	0.0560227	up	yes
MSTRG.33593	TTK, partial [Cervus elaphus hippelaphus]	0.28698	-1.80098	0.00620567	0.0562083	down	yes
MSTRG.33981	OSTM1, partial [Cervus elaphus hippelaphus]	2.63303	1.39672	0.00622503	0.0563451	up	yes
MSTRG.33096	hypothetical protein Celaphus_00017743 [Cervus elaphus hippelaphus]	1.72124	0.78345	0.00626744	0.0566319	up	no
MSTRG.17065	egl nine homolog 3 isoform X3 [Odocoileus virginianus texanus]	1.80961	0.85568	0.00629505	0.0567534	up	no
MSTRG.10750	SNCAIP [Cervus elaphus hippelaphus]	0.201594	-2.31047	0.00630793	0.0568423	down	yes
MSTRG.36261	hypothetical protein Celaphus_00019505 [Cervus elaphus hippelaphus]	1.64532	0.718368	0.0063144	0.0568425	up	no
MSTRG.10120	USHBP1 [Cervus elaphus hippelaphus]	1.93062	0.949065	0.00634856	0.0570917	up	no
MSTRG.2375	hypothetical protein A6R68_20704 [Neotoma lepida]	1.75636	0.812588	0.0063544	0.0571248	up	no
MSTRG.11284	SPARC [Cervus elaphus hippelaphus]	1.73202	0.792458	0.00638866	0.0573742	up	no
MSTRG.15974	ABHD4 [Cervus elaphus hippelaphus]	1.93071	0.949134	0.00642125	0.0576277	up	no
MSTRG.19598	hypothetical protein Celaphus_00008498 [Cervus elaphus hippelaphus]	0.275358	-1.86062	0.00643351	0.0576986	down	yes
gene-Celaphus_00006488	hypothetical protein Celaphus_00006488 [Cervus elaphus hippelaphus]	2.09977	1.07023	0.00646215	0.0578964	up	yes
MSTRG.15997	NDRG2 [Cervus elaphus hippelaphus]	1.74717	0.80502	0.0064665	0.0579158	up	no
MSTRG.12450	LIMK1, partial [Cervus elaphus hippelaphus]	1.63153	0.706224	0.00648381	0.0580315	up	no
MSTRG.22783	IRF5, partial [Cervus elaphus hippelaphus]	2.17455	1.12072	0.00649152	0.0580809	up	yes
MSTRG.33000	hypothetical protein Celaphus_00017706 [Cervus elaphus hippelaphus]	1.89079	0.918989	0.00656428	0.0585732	up	no
MSTRG.10914	hypothetical protein Celaphus_00003527 [Cervus elaphus hippelaphus]	2.96544	1.56825	0.00662822	0.0590839	up	yes
MSTRG.3110	hypothetical protein Celaphus_00003935 [Cervus elaphus hippelaphus]	3.383	1.7583	0.00665249	0.0591805	up	yes
MSTRG.25982	PREDICTED: V-type proton ATPase 21 kDa proteolipid subunit [Propithecus coquereli]	1.70631	0.770879	0.00668207	0.0594236	up	no
MSTRG.29303	PCMTD2 [Cervus elaphus hippelaphus]	1.7852	0.836085	0.00668494	0.0594292	up	no
MSTRG.595	TPP1 [Cervus elaphus hippelaphus]	1.63426	0.708639	0.00669582	0.0595059	up	no
MSTRG.9748	ACSL3 [Cervus elaphus hippelaphus]	0.344537	-1.53727	0.00670078	0.0595289	down	yes
MSTRG.8235	PREDICTED: BAG family molecular chaperone regulator 2, partial [Bison bison bison]	0.320519	-1.64152	0.00670714	0.0595289	down	yes
MSTRG.19694	SCD [Cervus elaphus hippelaphus]	0.324255	-1.6248	0.00671947	0.0596158	down	yes
MSTRG.10330	COL5A3 [Cervus elaphus hippelaphus]	1.8043	0.851438	0.00680008	0.0602097	up	no
MSTRG.37338	CDCA7 [Cervus elaphus hippelaphus]	0.265577	-1.9128	0.00694574	0.0612396	down	yes
MSTRG.25343	CNN3 [Cervus elaphus hippelaphus]	0.315378	-1.66485	0.00695579	0.0612682	down	yes
MSTRG.33042	hypothetical protein Celaphus_00017710 [Cervus elaphus hippelaphus]	1.6409	0.714487	0.00699376	0.0615179	up	no
MSTRG.24298	TRPC1, partial [Cervus elaphus hippelaphus]	1.76639	0.820805	0.0069967	0.0615179	up	no
MSTRG.31044	KCNMB1 [Cervus elaphus hippelaphus]	0.256703	-1.96183	0.00704076	0.061823	down	yes
MSTRG.6914	RND2, partial [Cervus elaphus hippelaphus]	2.18683	1.12884	0.00709552	0.0622006	up	yes
MSTRG.26727	protein-L-isoaspartate O-methyltransferase domain-containing protein 1 [Bos taurus]	1.72678	0.788085	0.00710313	0.0622466	up	no
MSTRG.7098	hypothetical protein Celaphus_00001466 [Cervus elaphus hippelaphus]	1.68359	0.75154	0.00710601	0.0622512	up	no
MSTRG.9771	EPHA4 [Cervus elaphus hippelaphus]	2.383	1.25278	0.00718184	0.0628206	up	yes
MSTRG.14985	PREDICTED: sodium/calcium exchanger 3 isoform X6 [Bos mutus]	1.73792	0.797363	0.00722285	0.0631492	up	no
MSTRG.27964	A2M [Cervus elaphus hippelaphus]	2.11384	1.07987	0.00723144	0.0632034	up	yes
MSTRG.6447	hypothetical protein Celaphus_00001014 [Cervus elaphus hippelaphus];unnamed protein product, partial [Mus musculus]	0.317094	-1.65702	0.00726253	0.0634192	down	yes
MSTRG.37496	LY75, partial [Cervus elaphus hippelaphus]	3.67583	1.87807	0.00726769	0.0634363	up	yes
MSTRG.6144	SPAG5 [Cervus elaphus hippelaphus]	0.325076	-1.62115	0.00733125	0.0638435	down	yes
MSTRG.6671	PREDICTED: homeobox protein DLX-4 isoform X1 [Ovis aries musimon]	2.5346	1.34176	0.00733401	0.0638465	up	yes
MSTRG.29270	solute carrier family 23 member 2 [Odocoileus virginianus texanus]	2.15193	1.10563	0.00737273	0.0641624	up	yes
MSTRG.39463	hypothetical protein Celaphus_00010142, partial [Cervus elaphus hippelaphus];hypothetical protein Celaphus_00010143 [Cervus elaphus hippelaphus]	0.252733	-1.98431	0.00740007	0.0643157	down	yes
MSTRG.9847	LOW QUALITY PROTEIN: ankyrin repeat and death domain-containing protein 1B [Ovis aries]	1.90347	0.928633	0.00740435	0.0643317	up	no
MSTRG.20385	alpha-catulin isoform X1 [Ovis aries]	2.0108	1.00777	0.00740972	0.0643361	up	yes
MSTRG.3290	hypothetical protein Celaphus_00003983, partial [Cervus elaphus hippelaphus]	2.0223	1.016	0.00744057	0.0645191	up	yes
MSTRG.4135	hypothetical protein Celaphus_00004572, partial [Cervus elaphus hippelaphus]	2.42856	1.2801	0.00746564	0.0646728	up	yes
MSTRG.1156	SLC25A22 [Cervus elaphus hippelaphus]	0.283759	-1.81726	0.00756621	0.0653298	down	yes
MSTRG.2027	hypothetical protein Celaphus_00011323, partial [Cervus elaphus hippelaphus]	0.260488	-1.94071	0.00756866	0.0653298	down	yes
MSTRG.34403	myeloid/lymphoid or mixed-lineage leukemia (trithorax homolog, Drosophila); translocated to, 3, isoform CRA_a [Homo sapiens]	1.7863	0.836973	0.00758539	0.0654527	up	no
MSTRG.14367	hypothetical protein Celaphus_00005766 [Cervus elaphus hippelaphus]	0.112287	-3.15474	0.00760289	0.0655793	down	yes
MSTRG.10092	hypothetical protein Celaphus_00002967 [Cervus elaphus hippelaphus]	2.43355	1.28306	0.00760812	0.0655793	up	yes
MSTRG.1149	hypothetical protein Celaphus_00013095 [Cervus elaphus hippelaphus]	0.308992	-1.69436	0.00760901	0.0655793	down	yes
MSTRG.30278	KIF15 [Cervus elaphus hippelaphus]	0.341643	-1.54944	0.00762293	0.0656481	down	yes
MSTRG.18452	HMCN1, partial [Cervus elaphus hippelaphus]	2.28257	1.19066	0.00763186	0.0656822	up	yes
MSTRG.25675	hypothetical protein Celaphus_00002462 [Cervus elaphus hippelaphus]	2.57318	1.36355	0.00764615	0.0656983	up	yes
MSTRG.9260	ECE1 [Cervus elaphus hippelaphus];hypothetical protein Celaphus_00014739, partial [Cervus elaphus hippelaphus]	1.76597	0.820464	0.00765601	0.065747	up	no
MSTRG.6108	PREDICTED: uncharacterized protein LOC105078493 [Camelus bactrianus]	1.94366	0.958774	0.00767047	0.0658216	up	no
MSTRG.1535	FADS2 [Cervus elaphus hippelaphus]	0.268095	-1.89918	0.00768028	0.065863	down	yes
MSTRG.9783	chondroitin sulfate synthase 2 [Bubalus bubalis]	1.70967	0.773714	0.00768397	0.0658733	up	no
MSTRG.19744	NOLC1 [Cervus elaphus hippelaphus]	0.346223	-1.53023	0.00773121	0.06616	down	yes
MSTRG.30666	T-cell leukemia translocation-altered gene protein [Odocoileus virginianus texanus]	1.58805	0.667256	0.00773243	0.06616	up	no
MSTRG.11272	GM2A [Cervus elaphus hippelaphus]	1.76809	0.822188	0.00776757	0.0663962	up	no
MSTRG.32400	FBXO5 [Cervus elaphus hippelaphus]	0.312613	-1.67755	0.00783067	0.066849	down	yes
MSTRG.29622	SRC [Cervus elaphus hippelaphus]	1.6546	0.726486	0.0078386	0.0668543	up	no
MSTRG.14076	hypothetical protein Celaphus_00005643 [Cervus elaphus hippelaphus];PRKCE [Cervus elaphus hippelaphus]	1.60822	0.685466	0.00783888	0.0668543	up	no
MSTRG.28937	CUBN [Cervus elaphus hippelaphus];CUBN, partial [Cervus elaphus hippelaphus]	0.360307	-1.4727	0.00790132	0.0672566	down	yes
MSTRG.10547	PIP5K1C, partial [Cervus elaphus hippelaphus]	1.5812	0.661017	0.00791584	0.0673585	up	no
MSTRG.19602	PREDICTED: PDZ and LIM domain protein 1-like [Pantholops hodgsonii];PDLIM1, partial [Cervus elaphus hippelaphus]	0.270719	-1.88513	0.00796591	0.0676974	down	yes
MSTRG.24958	ITGA10 [Cervus elaphus hippelaphus]	1.58979	0.668837	0.00798665	0.0678083	up	no
MSTRG.29725	SERINC3 [Cervus elaphus hippelaphus]	1.67175	0.741355	0.00802481	0.0680885	up	no
MSTRG.28277	DENND5B [Cervus elaphus hippelaphus]	1.7006	0.766046	0.00806988	0.0683831	up	no
MSTRG.35884	ADPRHL1 [Cervus elaphus hippelaphus]	4.66902	2.22312	0.00807987	0.0684459	up	yes
MSTRG.25489	hypothetical protein Celaphus_00002373, partial [Cervus elaphus hippelaphus]	0.292192	-1.77501	0.00808679	0.0684825	down	yes
MSTRG.1430	hypothetical protein Celaphus_00013306 [Cervus elaphus hippelaphus]	1.66117	0.732196	0.00813724	0.068786	up	no
MSTRG.2659	hypothetical protein Celaphus_00011610 [Cervus elaphus hippelaphus]	3.42788	1.77732	0.00813825	0.068786	up	yes
MSTRG.9181	hypothetical protein Celaphus_00014672 [Cervus elaphus hippelaphus]	0.338514	-1.56271	0.0081825	0.0691159	down	yes
MSTRG.16917	MPI [Cervus elaphus hippelaphus]	1.61667	0.693023	0.00819481	0.0691977	up	no
MSTRG.30798	CXCR6 [Cervus elaphus hippelaphus]	2.57407	1.36405	0.00822274	0.0693892	up	yes
MSTRG.8460	TFEB, partial [Cervus elaphus hippelaphus]	1.78722	0.837714	0.00825671	0.069587	up	no
MSTRG.13554	SPDYA [Cervus elaphus hippelaphus]	1.99886	0.999177	0.00825949	0.0695883	up	no
MSTRG.24959	ANKRD35, partial [Cervus elaphus hippelaphus]	1.65949	0.730739	0.00828474	0.0697787	up	no
MSTRG.34243	FAM167A [Cervus elaphus hippelaphus]	2.19335	1.13313	0.00832314	0.0700129	up	yes
MSTRG.1827	PREDICTED: disks large homolog 2 isoform X7 [Camelus ferus]	0.299982	-1.73705	0.00835178	0.0702092	down	yes
MSTRG.6445	MYH10, partial [Cervus elaphus hippelaphus]	0.351392	-1.50885	0.00844682	0.0708279	down	yes
MSTRG.5216	RNF34 [Cervus elaphus hippelaphus]	1.7023	0.767488	0.0084663	0.0709237	up	no
MSTRG.20535	PTPDC1, partial [Cervus elaphus hippelaphus]	0.331727	-1.59193	0.00849794	0.0711211	down	yes
MSTRG.15951	RNASE4 [Cervus elaphus hippelaphus]	1.7633	0.818278	0.00856594	0.0715801	up	no
MSTRG.23792	hypothetical protein Celaphus_00012719, partial [Cervus elaphus hippelaphus]	0.341746	-1.549	0.00856632	0.0715801	down	yes
MSTRG.38963	hypothetical protein Celaphus_00009950, partial [Cervus elaphus hippelaphus]	0.323764	-1.62699	0.00857927	0.0716657	down	yes
MSTRG.560	hypothetical protein Celaphus_00009094 [Cervus elaphus hippelaphus]	1.60278	0.680573	0.00864765	0.0721684	up	no
MSTRG.27963	A2M, partial [Cervus elaphus hippelaphus]	2.15812	1.10978	0.00866031	0.0722409	up	yes
MSTRG.17958	GORAB [Cervus elaphus hippelaphus]	0.372143	-1.42607	0.00866824	0.0722718	down	yes
MSTRG.10183	hypothetical protein Celaphus_00003038, partial [Cervus elaphus hippelaphus]	0.306127	-1.7078	0.00867917	0.0723401	down	yes
MSTRG.11865	hypothetical protein Celaphus_00006820 [Cervus elaphus hippelaphus]	2.69524	1.43041	0.0086985	0.0724327	up	yes
MSTRG.2781	METTL1 [Cervus elaphus hippelaphus]	0.372666	-1.42404	0.00872321	0.072547	down	yes
MSTRG.11020	hypothetical protein Celaphus_00003602 [Cervus elaphus hippelaphus]	0.382122	-1.3879	0.00878144	0.0729166	down	yes
MSTRG.19719	NPM3 [Cervus elaphus hippelaphus]	0.292627	-1.77286	0.00880745	0.0730657	down	yes
MSTRG.11935	cell death-inducing p53-target protein 1 isoform X1 [Physeter catodon]	1.67486	0.74404	0.00881934	0.0730935	up	no
MSTRG.7480	AXIN2 [Cervus elaphus hippelaphus]	2.14525	1.10114	0.00882224	0.0730946	up	yes
MSTRG.30661	KLHDC8B [Cervus elaphus hippelaphus]	1.72073	0.783017	0.00888001	0.0735041	up	no
MSTRG.25029	transcription termination factor 2 isoform X1 [Bos indicus x Bos taurus]	0.365391	-1.45249	0.00892274	0.0736618	down	yes
MSTRG.37244	SEC14 domain and spectrin repeat-containing protein 1-A [Xenopus laevis]	2.08682	1.06131	0.00895829	0.0738975	up	yes
MSTRG.9608	MTMR9 [Cervus elaphus hippelaphus]	1.54523	0.627825	0.00902782	0.0743147	up	no
MSTRG.3414	SHCBP1 [Cervus elaphus hippelaphus]	0.316396	-1.6602	0.00902803	0.0743147	down	yes
MSTRG.31465	CARD6 [Cervus elaphus hippelaphus]	1.72585	0.787307	0.00903584	0.0743516	up	no
MSTRG.10909	hypothetical protein Celaphus_00003521 [Cervus elaphus hippelaphus]	0.285242	-1.80974	0.00906258	0.0744557	down	yes
MSTRG.13339	RRM2 [Cervus elaphus hippelaphus]	0.345094	-1.53494	0.0091606	0.0750976	down	yes
MSTRG.22435	hypothetical protein Celaphus_00012051 [Cervus elaphus hippelaphus]	0.344671	-1.53671	0.00918368	0.0752168	down	yes
MSTRG.26979	hypothetical protein Celaphus_00016333 [Cervus elaphus hippelaphus]	2.02956	1.02117	0.00925445	0.0757189	up	yes
MSTRG.4838	myotubularin-related protein 3 isoform X2 [Ovis aries];MTMR3 [Cervus elaphus hippelaphus]	1.61088	0.687846	0.00925644	0.0757189	up	no
gene-Celaphus_00007928	GDF5 [Cervus elaphus hippelaphus]	2.53816	1.34378	0.00930755	0.0759958	up	yes
MSTRG.25451	unnamed protein product [Homo sapiens]	1.83934	0.879184	0.00936766	0.0764158	up	no
MSTRG.13346	ornithine decarboxylase [Odocoileus virginianus texanus]	0.300503	-1.73455	0.00944922	0.0768913	down	yes
MSTRG.20012	CPXM2 [Cervus elaphus hippelaphus]	0.248876	-2.0065	0.00946775	0.0769947	down	yes
MSTRG.13538	ZNF512 [Cervus elaphus hippelaphus]	1.77609	0.828703	0.00947173	0.0770033	up	no
MSTRG.28102	hypothetical protein Celaphus_00014038, partial [Cervus elaphus hippelaphus]	0.338481	-1.56285	0.00957337	0.0776148	down	yes
MSTRG.12341	CCT6A [Cervus elaphus hippelaphus]	0.380798	-1.3929	0.00960214	0.0778003	down	yes
MSTRG.36353	NFKBIZ, partial [Cervus elaphus hippelaphus]	1.57936	0.65934	0.00962044	0.0779008	up	no
MSTRG.37401	SSB [Cervus elaphus hippelaphus]	0.372871	-1.42325	0.00969505	0.0783965	down	yes
MSTRG.9975	hypothetical protein Celaphus_00002874 [Cervus elaphus hippelaphus]	1.59659	0.674992	0.00972123	0.0785245	up	no
MSTRG.6122	hypothetical protein Celaphus_00000742, partial [Cervus elaphus hippelaphus];hypothetical protein Celaphus_00000743, partial [Cervus elaphus hippelaphus]	0.354437	-1.4964	0.00972761	0.078552	down	yes
MSTRG.36828	hypothetical protein Celaphus_00019345 [Cervus elaphus hippelaphus];FGFR1 [Cervus elaphus hippelaphus]	1.70756	0.771933	0.00973686	0.0786027	up	no
MSTRG.18989	CDH23 [Cervus elaphus hippelaphus]	2.14678	1.10218	0.00974414	0.0786135	up	yes
gene-Celaphus_00016126	hypothetical protein Celaphus_00016126 [Cervus elaphus hippelaphus]	2.36075	1.23924	0.00976236	0.0786883	up	yes
MSTRG.15290	SEMA6D [Cervus elaphus hippelaphus]	1.84581	0.884252	0.009787	0.0787881	up	no
MSTRG.29770	ELMO2 [Cervus elaphus hippelaphus]	1.56987	0.650649	0.00978953	0.0787881	up	no
MSTRG.1930	hypothetical protein Celaphus_00013606 [Cervus elaphus hippelaphus]	1.65848	0.729862	0.00979217	0.0787881	up	no
MSTRG.36029	A disintegrin and metalloproteinase with thrombospondin motifs 1 [Odocoileus virginianus texanus]	1.69129	0.758128	0.00979262	0.0787881	up	no
MSTRG.24352	TM4SF1, partial [Cervus elaphus hippelaphus]	1.6067	0.684099	0.0098056	0.0788446	up	no
MSTRG.27363	SLC26A7, partial [Cervus elaphus hippelaphus]	0.221085	-2.17733	0.00982981	0.0789671	down	yes
MSTRG.38554	MORC family CW-type zinc finger protein 4 isoform X1 [Odocoileus virginianus texanus];hypothetical protein Celaphus_00009762, partial [Cervus elaphus hippelaphus]	0.349524	-1.51654	0.00987169	0.0791968	down	yes
MSTRG.28207	SSPN [Cervus elaphus hippelaphus]	0.360774	-1.47083	0.00989103	0.0792662	down	yes
MSTRG.12704	hypothetical protein Celaphus_00007354 [Cervus elaphus hippelaphus]	2.25344	1.17213	0.00992416	0.0794594	up	yes
MSTRG.37367	CYBRD1 [Cervus elaphus hippelaphus]	1.85712	0.893065	0.0099359	0.0795052	up	no
MSTRG.35785	hypothetical protein Celaphus_00016813, partial [Cervus elaphus hippelaphus]	0.310685	-1.68648	0.0100129	0.0800245	down	yes
MSTRG.17635	CR2 [Cervus elaphus hippelaphus]	6.8804	2.78249	0.010036	0.0801852	up	yes
MSTRG.19755	TRIM8 [Cervus elaphus hippelaphus]	1.5756	0.655902	0.0100567	0.0803262	up	no
MSTRG.9774	SLC4A3 [Cervus elaphus hippelaphus];hypothetical protein Celaphus_00015002, partial [Cervus elaphus hippelaphus]	1.92907	0.947908	0.010088	0.0804784	up	no
MSTRG.34633	PUM3 [Cervus elaphus hippelaphus]	0.32551	-1.61923	0.0101031	0.0805617	down	yes
MSTRG.34875	SLC25A51, partial [Cervus elaphus hippelaphus]	1.54761	0.630042	0.0101045	0.0805617	up	no
MSTRG.12547	TSC22D4, partial [Cervus elaphus hippelaphus]	1.66083	0.731902	0.0101408	0.0808022	up	no
MSTRG.30186	ACVR2B [Cervus elaphus hippelaphus]	1.96885	0.977357	0.01018	0.0810168	up	no
MSTRG.26927	TPA: staufen homolog 2 [Bos taurus]	1.86176	0.896668	0.0101895	0.0810436	up	no
MSTRG.278	APOA1 [Cervus elaphus hippelaphus]	1.70955	0.773613	0.0102118	0.0811966	up	no
MSTRG.23667	hypothetical protein Celaphus_00012636 [Cervus elaphus hippelaphus]	1.97756	0.983723	0.0102206	0.0812146	up	no
MSTRG.7223	C1QTNF1 [Cervus elaphus hippelaphus]	1.76442	0.819193	0.0102234	0.0812146	up	no
MSTRG.25164	AMIGO1 [Cervus elaphus hippelaphus]	2.93439	1.55306	0.0102252	0.0812146	up	yes
MSTRG.6710	PRR15L [Cervus elaphus hippelaphus]	0.259827	-1.94438	0.0102263	0.0812146	down	yes
MSTRG.11480	VCAN, partial [Cervus elaphus hippelaphus];VCAN [Cervus elaphus hippelaphus]	0.269337	-1.89251	0.0102317	0.0812325	down	yes
MSTRG.26667	MTSS1 [Cervus elaphus hippelaphus]	1.63329	0.707783	0.0102357	0.0812402	up	no
MSTRG.37987	PREDICTED: nucleolar protein 58 isoform X3 [Pantholops hodgsonii]	0.385757	-1.37424	0.0102473	0.0813077	down	yes
MSTRG.39435	hypothetical protein Celaphus_00010136 [Cervus elaphus hippelaphus]	0.362468	-1.46407	0.0102545	0.0813215	down	yes
MSTRG.8543	SLC29A1 [Cervus elaphus hippelaphus]	1.75767	0.813667	0.0102949	0.081563	up	no
MSTRG.21176	dickkopf-related protein 2 isoform X2 [Odocoileus virginianus texanus]	0.0600837	-4.05688	0.0103158	0.0817042	down	yes
MSTRG.18352	GLUL [Cervus elaphus hippelaphus]	1.60823	0.685475	0.0103232	0.0817244	up	no
MSTRG.15828	hypothetical protein Celaphus_00006402 [Cervus elaphus hippelaphus]	0.297995	-1.74664	0.0103245	0.0817244	down	yes
MSTRG.5086	IQCD [Cervus elaphus hippelaphus]	2.15216	1.10578	0.0103654	0.0820235	up	yes
MSTRG.19217	TSPAN14 [Cervus elaphus hippelaphus]	1.53819	0.621233	0.0104362	0.0824351	up	no
MSTRG.24830	SNARE-associated protein Snapin [Bos taurus]	1.71815	0.780855	0.0104471	0.0824967	up	no
MSTRG.16065	hypothetical protein Celaphus_00006550 [Cervus elaphus hippelaphus]	1.58351	0.663126	0.0105197	0.0828477	up	no
MSTRG.11412	MAT2B, partial [Cervus elaphus hippelaphus]	1.75484	0.811338	0.0105265	0.0828764	up	no
MSTRG.15962	PRMT5 [Cervus elaphus hippelaphus]	0.357477	-1.48408	0.0105456	0.0829771	down	yes
MSTRG.36969	NR1D2, partial [Cervus elaphus hippelaphus]	1.60881	0.685994	0.0105921	0.0832689	up	no
MSTRG.20605	DAPK1, partial [Cervus elaphus hippelaphus]	1.64682	0.719685	0.0106161	0.0833831	up	no
MSTRG.18941	TSPAN15 [Cervus elaphus hippelaphus]	1.65508	0.7269	0.01063	0.0834422	up	no
MSTRG.2239	LUM [Cervus elaphus hippelaphus]	0.334435	-1.5802	0.0106461	0.0835439	down	yes
MSTRG.23789	hypothetical protein Celaphus_00012718, partial [Cervus elaphus hippelaphus]	0.32313	-1.62981	0.0106541	0.0835824	down	yes
MSTRG.9797	sterol 26-hydroxylase, mitochondrial [Odocoileus virginianus texanus]	1.58588	0.665281	0.0108127	0.0845751	up	no
MSTRG.18245	peroxiredoxin-6 [Bos taurus]	1.78673	0.837318	0.0108369	0.0846895	up	no
MSTRG.37894	hypothetical protein Celaphus_00015995 [Cervus elaphus hippelaphus];hypothetical protein Celaphus_00015994, partial [Cervus elaphus hippelaphus];hypothetical protein Celaphus_00015993, partial [Cervus elaphus hippelaphus]	0.387539	-1.36759	0.0108486	0.0847305	down	yes
MSTRG.8509	PTK7 [Cervus elaphus hippelaphus]	0.312531	-1.67793	0.0108559	0.0847377	down	yes
MSTRG.36956	hypothetical protein Celaphus_00019393, partial [Cervus elaphus hippelaphus]	1.64431	0.717482	0.0108603	0.0847467	up	no
MSTRG.38925	EBP [Cervus elaphus hippelaphus]	0.362893	-1.46238	0.010893	0.0849523	down	yes
MSTRG.9332	uncharacterized protein LOC110125468 [Odocoileus virginianus texanus]	3.30935	1.72655	0.0109063	0.0850115	up	yes
MSTRG.32692	cerebellin-2 precursor [Macaca mulatta]	2.18435	1.1272	0.0109826	0.0853805	up	yes
MSTRG.13048	TBC1D13 [Cervus elaphus hippelaphus]	0.372104	-1.42622	0.0110076	0.0854426	down	yes
MSTRG.5031	hypothetical protein Celaphus_00000228 [Cervus elaphus hippelaphus]	1.60098	0.678958	0.0110144	0.0854454	up	no
MSTRG.28232	Serine/threonine-protein kinase 38-like protein, partial [Pteropus alecto]	2.12514	1.08756	0.0110338	0.0855366	up	yes
MSTRG.10936	HMHA1 [Cervus elaphus hippelaphus]	1.59428	0.672902	0.0110799	0.0858267	up	no
MSTRG.20816	HR [Cervus elaphus hippelaphus];hypothetical protein Celaphus_00017160 [Cervus elaphus hippelaphus]	0.316028	-1.66188	0.0111175	0.0860677	down	yes
MSTRG.30197	CX3CR1 [Cervus elaphus hippelaphus]	2.05205	1.03707	0.0111447	0.0862283	up	yes
MSTRG.26479	hypothetical protein Celaphus_00016165 [Cervus elaphus hippelaphus]	1.56816	0.649076	0.0111616	0.0863082	up	no
MSTRG.33184	hypothetical protein Celaphus_00017783, partial [Cervus elaphus hippelaphus]	0.101846	-3.29554	0.0112677	0.0870851	down	yes
MSTRG.28314	PREDICTED: LOW QUALITY PROTEIN: thiosulfate sulfurtransferase (rhodanese) [Pantholops hodgsonii]	2.09488	1.06687	0.0112687	0.0870851	up	yes
MSTRG.18442	CENPF [Cervus elaphus hippelaphus]	0.365925	-1.45038	0.0112761	0.087103	down	yes
MSTRG.6159	FLOT2, partial [Cervus elaphus hippelaphus]	1.5298	0.613339	0.0113212	0.0873633	up	no
MSTRG.21210	hypothetical protein Celaphus_00018570, partial [Cervus elaphus hippelaphus]	0.32166	-1.63639	0.0113571	0.0875888	down	yes
MSTRG.32091	hypothetical protein Celaphus_00019041 [Cervus elaphus hippelaphus]	1.78229	0.833732	0.0114115	0.0879063	up	no
MSTRG.23729	hypothetical protein Celaphus_00012684, partial [Cervus elaphus hippelaphus];Kalirin [Pteropus alecto]	1.64096	0.714544	0.0114195	0.0879425	up	no
MSTRG.30737	hypothetical protein Celaphus_00010571 [Cervus elaphus hippelaphus]	1.51482	0.599142	0.0114752	0.0882423	up	no
MSTRG.29831	DDX27 [Cervus elaphus hippelaphus]	0.378914	-1.40006	0.0114797	0.0882503	down	yes
MSTRG.7545	endosomal/lysomomal potassium channel TMEM175 [Odocoileus virginianus texanus]	1.58629	0.665653	0.011486	0.0882503	up	no
MSTRG.18454	HMCN1, partial [Cervus elaphus hippelaphus]	2.02478	1.01777	0.0114896	0.0882503	up	yes
MSTRG.14236	CDC42EP3 [Cervus elaphus hippelaphus]	1.60953	0.68664	0.0114955	0.0882703	up	no
MSTRG.26971	cAMP-dependent protein kinase inhibitor alpha isoform X1 [Ovis aries]	0.280389	-1.8345	0.0115081	0.0882828	down	yes
MSTRG.10510	hypothetical protein Celaphus_00003307 [Cervus elaphus hippelaphus]	1.79033	0.840223	0.011549	0.0884753	up	no
MSTRG.39276	PTCHD1 [Cervus elaphus hippelaphus]	0.0622896	-4.00487	0.0116987	0.0894148	down	yes
MSTRG.24627	PREDICTED: phosphatase and actin regulator 4 [Lipotes vexillifer]	1.91995	0.941067	0.0117174	0.0894546	up	no
MSTRG.17740	BROX [Cervus elaphus hippelaphus]	1.80619	0.852947	0.0117278	0.0895075	up	no
MSTRG.33920	hypothetical protein Celaphus_00018855 [Cervus elaphus hippelaphus]	0.363341	-1.4606	0.0117586	0.089639	down	yes
MSTRG.30714	TRAIP [Cervus elaphus hippelaphus]	0.325461	-1.61944	0.0118488	0.0902233	down	yes
MSTRG.31529	DNAJC21 [Cervus elaphus hippelaphus]	0.344763	-1.53632	0.0119108	0.0905447	down	yes
MSTRG.3680	PSMB10 [Cervus elaphus hippelaphus]	1.64385	0.717078	0.011912	0.0905447	up	no
MSTRG.10123	hypothetical protein Celaphus_00002996 [Cervus elaphus hippelaphus]	1.80317	0.850539	0.0119175	0.0905447	up	no
MSTRG.9641	ZNF362, partial [Cervus elaphus hippelaphus]	1.59038	0.66937	0.0119589	0.0907212	up	no
gene-Celaphus_00006764	IGFALS [Cervus elaphus hippelaphus]	2.28778	1.19395	0.0119764	0.090777	up	yes
MSTRG.37619	hypothetical protein Celaphus_00015879, partial [Cervus elaphus hippelaphus]	3.15022	1.65545	0.0119932	0.0908543	up	yes
MSTRG.20200	TRAF1 [Cervus elaphus hippelaphus]	2.2326	1.15872	0.0119997	0.0908745	up	yes
MSTRG.8508	PTK7 [Cervus elaphus hippelaphus]	0.311648	-1.68201	0.0120436	0.0911285	down	yes
MSTRG.29264	hypothetical protein Celaphus_00007693, partial [Cervus elaphus hippelaphus];glycerophosphocholine phosphodiesterase GPCPD1 isoform X2 [Bubalus bubalis];hypothetical protein Celaphus_00007692 [Cervus elaphus hippelaphus]	0.386107	-1.37293	0.0120521	0.091167	down	yes
MSTRG.33349	SEC11C, partial [Cervus elaphus hippelaphus]	0.344057	-1.53928	0.0120751	0.0913146	down	yes
MSTRG.7674	SH3BP2 [Cervus elaphus hippelaphus]	1.58264	0.662334	0.0120836	0.0913527	up	no
MSTRG.20378	PTPN3, partial [Cervus elaphus hippelaphus]	1.82224	0.865716	0.0121027	0.0914707	up	no
MSTRG.21792	ASNS [Cervus elaphus hippelaphus]	0.374952	-1.41522	0.0121119	0.0915026	down	yes
MSTRG.38468	hypothetical protein Celaphus_00009721, partial [Cervus elaphus hippelaphus]	0.0764207	-3.70989	0.0121173	0.0915026	down	yes
MSTRG.6237	scavenger receptor class F member 1 isoform X1 [Bubalus bubalis]	1.63082	0.705597	0.0121513	0.091707	up	no
MSTRG.5461	hypothetical protein Celaphus_00000498, partial [Cervus elaphus hippelaphus];hypothetical protein Celaphus_00000497, partial [Cervus elaphus hippelaphus]	0.353391	-1.50066	0.0121694	0.0917912	down	yes
MSTRG.18969	hypothetical protein Celaphus_00008254, partial [Cervus elaphus hippelaphus]	1.72964	0.790469	0.0122191	0.0920873	up	no
MSTRG.5406	Rapgef2 protein, partial [Mus musculus];rap guanine nucleotide exchange factor 2 isoform X17 [Bos taurus]	1.68476	0.752542	0.0122394	0.0921873	up	no
MSTRG.34286	ZNF395 [Cervus elaphus hippelaphus]	1.51119	0.595689	0.012284	0.0924715	up	no
MSTRG.28633	hypothetical protein Celaphus_00007444 [Cervus elaphus hippelaphus];hypothetical protein Celaphus_00007443 [Cervus elaphus hippelaphus]	1.81078	0.856611	0.0122934	0.0925153	up	no
MSTRG.1046	NR1H3 [Cervus elaphus hippelaphus]	1.536	0.619178	0.0123258	0.092694	up	no
MSTRG.2585	PDZRN4, partial [Cervus elaphus hippelaphus]	0.318389	-1.65114	0.0123276	0.092694	down	yes
MSTRG.9241	putative inactive group IIC secretory phospholipase A2 isoform X1 [Bubalus bubalis]	2.09355	1.06595	0.0123464	0.0927822	up	yes
MSTRG.20686	NUDT2 [Cervus elaphus hippelaphus]	1.5432	0.625925	0.012403	0.0931263	up	no
MSTRG.11521	arrestin domain-containing protein 3 [Camelus ferus]	1.81028	0.856214	0.0124074	0.0931263	up	no
MSTRG.27910	LPAR5, partial [Cervus elaphus hippelaphus]	1.88794	0.916815	0.0124198	0.0931263	up	no
MSTRG.12193	IL4R [Cervus elaphus hippelaphus]	1.74385	0.802274	0.0124233	0.0931263	up	no
MSTRG.23727	KALRN, partial [Cervus elaphus hippelaphus]	1.94996	0.963445	0.0124254	0.0931263	up	no
MSTRG.11137	PCDH1 [Cervus elaphus hippelaphus]	1.68831	0.755582	0.0124255	0.0931263	up	no
MSTRG.6641	CACNA1G, partial [Cervus elaphus hippelaphus]	0.330021	-1.59937	0.0124274	0.0931263	down	yes
MSTRG.30317	LIM and cysteine-rich domains protein 1, partial [Bos mutus];LMCD1, partial [Cervus elaphus hippelaphus]	0.34895	-1.51891	0.0124325	0.0931378	down	yes
MSTRG.5878	probable ATP-dependent RNA helicase DHX40 isoform 1 [Homo sapiens]	1.67365	0.742995	0.0124584	0.0932788	up	no
MSTRG.3656	KCTD19, partial [Cervus elaphus hippelaphus]	0.250171	-1.99902	0.0124677	0.0933227	down	yes
MSTRG.17001	G2/M phase-specific E3 ubiquitin-protein ligase isoform X1 [Odocoileus virginianus texanus]	0.394092	-1.34339	0.0125567	0.093882	down	yes
MSTRG.26129	FHL3 [Cervus elaphus hippelaphus]	0.314923	-1.66693	0.0126016	0.0941643	down	yes
MSTRG.15942	small kinetochore-associated protein [Odocoileus virginianus texanus]	0.343145	-1.54311	0.0126327	0.0943435	down	yes
MSTRG.14412	FHL2 [Cervus elaphus hippelaphus]	0.292344	-1.77426	0.0126738	0.094526	down	yes
MSTRG.19264	hypothetical protein Celaphus_00008387 [Cervus elaphus hippelaphus]	1.87384	0.905997	0.0127425	0.0948954	up	no
MSTRG.5961	PREDICTED: acetyl-CoA carboxylase 1 isoform X1 [Pantholops hodgsonii]	0.365154	-1.45342	0.0128083	0.0952517	down	yes
MSTRG.15158	disheveled-associated activator of morphogenesis 1 [Bos taurus]	1.7441	0.802482	0.0128802	0.0955976	up	no
MSTRG.12904	EGFL7 [Cervus elaphus hippelaphus]	1.5682	0.649107	0.0129422	0.095923	up	no
MSTRG.27049	TRPS1, partial [Cervus elaphus hippelaphus]	1.80066	0.848524	0.0129537	0.0959547	up	no
MSTRG.26735	ATP6V1H [Cervus elaphus hippelaphus]	1.60108	0.67905	0.0129657	0.0960169	up	no
MSTRG.29463	TPX2, partial [Cervus elaphus hippelaphus]	0.363059	-1.46172	0.0129818	0.0961089	down	yes
MSTRG.35352	relaxin receptor 2 isoform X1 [Odocoileus virginianus texanus]	0.0834445	-3.58304	0.0130558	0.0965753	down	yes
MSTRG.14062	TTC7A, partial [Cervus elaphus hippelaphus]	1.51673	0.600964	0.013062	0.0965947	up	no
MSTRG.7351	LLGL2 [Cervus elaphus hippelaphus]	1.95822	0.969545	0.0131296	0.0970129	up	no
MSTRG.25838	ORC1 [Cervus elaphus hippelaphus]	0.34407	-1.53923	0.0131386	0.097038	down	yes
MSTRG.4967	hypothetical protein Celaphus_00000184, partial [Cervus elaphus hippelaphus]	1.69179	0.758553	0.0131403	0.097038	up	no
MSTRG.29746	ubiquitin-conjugating enzyme E2 C [Camelus ferus]	0.33931	-1.55933	0.0131894	0.0972915	down	yes
MSTRG.24221	hypothetical protein Celaphus_00012970 [Cervus elaphus hippelaphus]	0.290395	-1.78391	0.0132011	0.0973234	down	yes
MSTRG.34417	PLIN2 [Cervus elaphus hippelaphus]	1.70404	0.768956	0.0132486	0.0975919	up	no
MSTRG.38390	SLC6A8 [Cervus elaphus hippelaphus]	1.71768	0.780464	0.013256	0.0975919	up	no
MSTRG.5210	P2RX4 [Cervus elaphus hippelaphus]	1.5183	0.602454	0.0132603	0.0975968	up	no
MSTRG.13834	E3 ubiquitin-protein transferase RMND5A isoform X1 [Ursus arctos horribilis]	1.6742	0.743469	0.0134244	0.0984207	up	no
MSTRG.1877	SYTL2 [Cervus elaphus hippelaphus]	0.299421	-1.73975	0.0134299	0.098434	down	yes
MSTRG.19549	KIF11, partial [Cervus elaphus hippelaphus]	0.327398	-1.61088	0.0134482	0.0985043	down	yes
MSTRG.18191	CPTP [Cervus elaphus hippelaphus]	1.5282	0.611831	0.0134507	0.0985043	up	no
MSTRG.29674	PLCG1 [Cervus elaphus hippelaphus]	1.65418	0.726117	0.0135465	0.0990596	up	no
MSTRG.27733	LGALS1 [Cervus elaphus hippelaphus]	0.341009	-1.55212	0.0135822	0.0992059	down	yes
MSTRG.32974	hypothetical protein Celaphus_00017686 [Cervus elaphus hippelaphus]	1.78581	0.836576	0.013584	0.0992059	up	no
MSTRG.16069	hypothetical protein Celaphus_00006551, partial [Cervus elaphus hippelaphus]	1.62347	0.699084	0.0135949	0.0992303	up	no
MSTRG.16080	PREDICTED: LOW QUALITY PROTEIN: beta-hexosaminidase subunit alpha [Pantholops hodgsonii]	1.57088	0.651571	0.0136108	0.0992989	up	no
MSTRG.571	PREDICTED: uncharacterized protein LOC105078493 [Camelus bactrianus]	1.65328	0.725328	0.0138047	0.10065	up	no
MSTRG.2845	interleukin 23 p19, partial [Cervus elaphus]	1.5272	0.610886	0.0138346	0.100833	up	no
MSTRG.2866	ERBB3 [Cervus elaphus hippelaphus]	4.01894	2.00681	0.0138888	0.101148	up	yes
MSTRG.4163	hypothetical protein Celaphus_00004591, partial [Cervus elaphus hippelaphus]	1.50831	0.59293	0.013915	0.101232	up	no
MSTRG.10663	chondroitin sulfate synthase 3-like [Odocoileus virginianus texanus]	0.374213	-1.41807	0.014006	0.101809	down	yes
MSTRG.11410	HMMR, partial [Cervus elaphus hippelaphus]	0.344828	-1.53605	0.0140513	0.101998	down	yes
MSTRG.3343	FOXC2 [Cervus elaphus hippelaphus]	1.83399	0.874986	0.0141198	0.102355	up	no
MSTRG.25191	GPSM2 [Cervus elaphus hippelaphus]	1.9961	0.997186	0.0141549	0.102525	up	no
MSTRG.17341	uncharacterized protein LOC102406900 isoform X2 [Bubalus bubalis]	0.237942	-2.07132	0.0141819	0.102692	down	yes
MSTRG.27398	CPNE3 [Cervus elaphus hippelaphus]	1.74379	0.80223	0.0142136	0.102893	up	no
MSTRG.22322	hypothetical protein Celaphus_00012035, partial [Cervus elaphus hippelaphus]	0.308728	-1.69559	0.0142555	0.103056	down	yes
MSTRG.2374	GRASP [Cervus elaphus hippelaphus]	1.48768	0.573062	0.0142828	0.103197	up	no
MSTRG.9832	PLCD4 [Cervus elaphus hippelaphus]	0.260355	-1.94145	0.0143073	0.103346	down	yes
MSTRG.14443	hypothetical protein Celaphus_00005809 [Cervus elaphus hippelaphus]	1.57269	0.653236	0.0143225	0.103399	up	no
MSTRG.2829	HSD17B6, partial [Cervus elaphus hippelaphus]	0.203141	-2.29945	0.0144085	0.103819	down	yes
MSTRG.16316	F2R [Cervus elaphus hippelaphus]	2.03055	1.02187	0.014416	0.103819	up	yes
MSTRG.19508	KIF20B, partial [Cervus elaphus hippelaphus]	0.387332	-1.36836	0.0144259	0.103834	down	yes
MSTRG.22635	ZMIZ2 [Cervus elaphus hippelaphus]	1.47528	0.560993	0.0144417	0.103919	up	no
MSTRG.22460	protein PTHB1, partial [Odocoileus virginianus texanus]	0.38495	-1.37726	0.0144561	0.103967	down	yes
MSTRG.7247	TK1 [Cervus elaphus hippelaphus]	0.319647	-1.64545	0.0145356	0.104367	down	yes
MSTRG.1881	SYTL2 [Cervus elaphus hippelaphus]	0.324513	-1.62365	0.0145766	0.104633	down	yes
MSTRG.18984	CDH23 [Cervus elaphus hippelaphus]	2.23476	1.16012	0.0146608	0.105047	up	yes
MSTRG.34179	hypothetical protein Celaphus_00018159 [Cervus elaphus hippelaphus]	0.325354	-1.61992	0.0146898	0.105103	down	yes
MSTRG.18530	CD34 [Cervus elaphus hippelaphus]	1.62042	0.696367	0.0146991	0.105141	up	no
MSTRG.36417	PI-PLC X domain-containing protein 2 [Odocoileus virginianus texanus]	0.352734	-1.50335	0.0147132	0.105175	down	yes
MSTRG.15418	hypothetical protein Celaphus_00006223 [Cervus elaphus hippelaphus]	1.60382	0.681516	0.0147217	0.105189	up	no
MSTRG.13094	ST6GALNAC6 [Cervus elaphus hippelaphus]	1.51728	0.601484	0.014777	0.105499	up	no
MSTRG.1573	solute carrier family 15 member 3 [Odocoileus virginianus texanus]	1.79714	0.845705	0.0148003	0.105632	up	no
MSTRG.13110	hypothetical protein Celaphus_00005207 [Cervus elaphus hippelaphus]	0.330305	-1.59813	0.0148438	0.105719	down	yes
MSTRG.15909	MEIS2 [Cervus elaphus hippelaphus];homeobox protein Meis2 isoform f [Homo sapiens]	0.36444	-1.45625	0.014849	0.105727	down	yes
MSTRG.14924	ZFYVE1 [Cervus elaphus hippelaphus];hypothetical protein Celaphus_00006020 [Cervus elaphus hippelaphus]	1.46806	0.55391	0.0148922	0.105949	up	no
MSTRG.34181	hypothetical protein Celaphus_00018158 [Cervus elaphus hippelaphus];hypothetical protein Celaphus_00018157, partial [Cervus elaphus hippelaphus]	0.323994	-1.62596	0.014904	0.105992	down	yes
MSTRG.4054	CAP-Gly domain-containing linker protein 3 [Vulpes vulpes]	1.50358	0.588399	0.014912	0.105992	up	no
MSTRG.37306	hypothetical protein Celaphus_00015740 [Cervus elaphus hippelaphus]	1.94984	0.963354	0.014926	0.105992	up	no
MSTRG.10960	hypothetical protein Celaphus_00003568 [Cervus elaphus hippelaphus]	1.799	0.847192	0.0150499	0.106726	up	no
MSTRG.36556	hypothetical protein Celaphus_00019237, partial [Cervus elaphus hippelaphus]	0.338652	-1.56213	0.0150643	0.1068	down	yes
MSTRG.30733	CELSR3 [Cervus elaphus hippelaphus]	1.54984	0.632116	0.0150767	0.106859	up	no
MSTRG.19284	MARCH8 [Cervus elaphus hippelaphus]	1.42802	0.514013	0.015107	0.107041	up	no
MSTRG.35160	SPRY domain-containing protein 7 isoform X2 [Pan troglodytes]	1.58787	0.667091	0.0151105	0.107041	up	no
MSTRG.10006	histone H2A type 3-like [Urocitellus parryii]	0.334256	-1.58097	0.0151621	0.107292	down	yes
MSTRG.35658	claudin-10 isoform b [Bos taurus]	2.08475	1.05987	0.0151954	0.107499	up	yes
MSTRG.34763	hypothetical protein Celaphus_00018390 [Cervus elaphus hippelaphus]	0.362135	-1.4654	0.0152702	0.107855	down	yes
MSTRG.19480	RNLS, partial [Cervus elaphus hippelaphus]	1.73627	0.79599	0.0152943	0.107909	up	no
MSTRG.28105	hypothetical protein Celaphus_00014039, partial [Cervus elaphus hippelaphus]	0.391594	-1.35257	0.0153422	0.108161	down	yes
MSTRG.9093	neuritin [Marmota flaviventris]	3.19084	1.67394	0.0153562	0.10823	up	yes
MSTRG.22709	hypothetical protein Celaphus_00012187, partial [Cervus elaphus hippelaphus]	1.50249	0.587359	0.0154133	0.108544	up	no
MSTRG.29354	hypothetical protein Celaphus_00007777 [Cervus elaphus hippelaphus]	0.390635	-1.35611	0.0154433	0.108641	down	yes
MSTRG.35754	sodium leak channel non-selective protein isoform X1 [Gallus gallus]	0.180005	-2.47389	0.0155053	0.108973	down	yes
MSTRG.32709	hypothetical protein Celaphus_00017586 [Cervus elaphus hippelaphus]	0.280502	-1.83392	0.0155135	0.108973	down	yes
MSTRG.14248	protein CEBPZOS isoform X1 [Bubalus bubalis]	1.85521	0.891585	0.0155146	0.108973	up	no
MSTRG.5326	ADGRD1, partial [Cervus elaphus hippelaphus];ADGRD1 [Cervus elaphus hippelaphus]	3.89867	1.96298	0.0155152	0.108973	up	yes
MSTRG.6334	hypothetical protein Celaphus_00000910 [Cervus elaphus hippelaphus]	1.91914	0.940463	0.015618	0.109542	up	no
MSTRG.29939	DOK5, partial [Cervus elaphus hippelaphus]	0.356591	-1.48766	0.0157375	0.110154	down	yes
MSTRG.24364	E3 ubiquitin-protein ligase RNF13 precursor [Bos taurus];RNF13, partial [Cervus elaphus hippelaphus]	1.59817	0.676421	0.0157593	0.11019	up	no
MSTRG.22436	EEPD1 [Cervus elaphus hippelaphus]	1.63806	0.711987	0.0157762	0.11025	up	no
MSTRG.12620	transmembrane protein 130 isoform X2 [Odocoileus virginianus texanus]	0.312854	-1.67644	0.0157903	0.110319	down	yes
MSTRG.24270	ATP1B3 [Cervus elaphus hippelaphus]	1.64454	0.717682	0.0158437	0.110575	up	no
MSTRG.6439	hypothetical protein Celaphus_00001013 [Cervus elaphus hippelaphus]	0.327774	-1.60923	0.0159094	0.110917	down	yes
MSTRG.32763	hypothetical protein Celaphus_00017603, partial [Cervus elaphus hippelaphus]	0.308711	-1.69567	0.0161146	0.11227	down	yes
MSTRG.20181	hypothetical protein Celaphus_00008814 [Cervus elaphus hippelaphus]	2.07309	1.05178	0.0161171	0.11227	up	yes
MSTRG.35326	N4BP2L1, partial [Cervus elaphus hippelaphus]	1.87862	0.909675	0.0163203	0.113393	up	no
MSTRG.11475	VCAN, partial [Cervus elaphus hippelaphus]	0.290604	-1.78287	0.0163485	0.113499	down	yes
MSTRG.6152	calfacilitin [Lagenorhynchus obliquidens]	1.64482	0.71793	0.0163601	0.11355	up	no
MSTRG.33653	hypothetical protein Celaphus_00018787 [Cervus elaphus hippelaphus]	1.81654	0.861193	0.0163734	0.113612	up	no
gene-Celaphus_00010266	hypothetical protein Celaphus_00010266, partial [Cervus elaphus hippelaphus]	2.20133	1.13837	0.016383	0.113619	up	yes
MSTRG.23739	HACD2 [Cervus elaphus hippelaphus]	0.394618	-1.34147	0.0163962	0.113681	down	yes
MSTRG.39472	ARSE, partial [Cervus elaphus hippelaphus]	0.289091	-1.7904	0.0164101	0.113748	down	yes
gene-Celaphus_00007346	SLC29A4 [Cervus elaphus hippelaphus]	0.229142	-2.12569	0.0164216	0.113798	down	yes
MSTRG.37430	STK39, partial [Cervus elaphus hippelaphus]	1.60662	0.684033	0.0164413	0.113845	up	no
MSTRG.6202	hypothetical protein Celaphus_00000803 [Cervus elaphus hippelaphus]	1.47792	0.563572	0.0164543	0.113905	up	no
MSTRG.23997	FBXO25, partial [Cervus elaphus hippelaphus]	1.5021	0.586977	0.0165278	0.114353	up	no
MSTRG.5438	INTU, partial [Cervus elaphus hippelaphus]	0.361781	-1.46681	0.0165748	0.114528	down	yes
MSTRG.33969	SESN1 [Cervus elaphus hippelaphus]	1.71856	0.781199	0.01659	0.114603	up	no
MSTRG.9784	DES [Cervus elaphus hippelaphus]	0.323514	-1.6281	0.0166147	0.114715	down	yes
MSTRG.15969	hypothetical protein Celaphus_00006460 [Cervus elaphus hippelaphus]	1.56148	0.642915	0.0167089	0.115124	up	no
MSTRG.10696	LMNB1 [Cervus elaphus hippelaphus]	0.355852	-1.49065	0.0168255	0.115837	down	yes
MSTRG.18439	CENPF [Cervus elaphus hippelaphus]	0.347726	-1.52398	0.0168431	0.115898	down	yes
MSTRG.4685	hypothetical protein Celaphus_00000005 [Cervus elaphus hippelaphus]	1.47582	0.561512	0.0168885	0.11618	up	no
MSTRG.18285	hypothetical protein Celaphus_00011148, partial [Cervus elaphus hippelaphus]	1.53386	0.617168	0.0169312	0.116396	up	no
MSTRG.34422	hypothetical protein Celaphus_00018270 [Cervus elaphus hippelaphus];hypothetical protein Celaphus_00018269, partial [Cervus elaphus hippelaphus]	0.348383	-1.52126	0.0169331	0.116396	down	yes
MSTRG.33689	serine incorporator 1 [Odocoileus virginianus texanus]	1.67524	0.744366	0.016943	0.116434	up	no
MSTRG.26944	JPH1, partial [Cervus elaphus hippelaphus]	1.53768	0.620758	0.0169605	0.116516	up	no
MSTRG.6430	PFAS [Cervus elaphus hippelaphus]	0.378767	-1.40062	0.0169638	0.116516	down	yes
MSTRG.9972	TBC1D9B [Cervus elaphus hippelaphus]	1.49474	0.579892	0.0170058	0.116683	up	no
MSTRG.11200	JAKMIP2 [Cervus elaphus hippelaphus]	0.281961	-1.82643	0.0170312	0.116816	down	yes
MSTRG.24410	ARHGEF26, partial [Cervus elaphus hippelaphus]	0.346122	-1.53065	0.0170341	0.116816	down	yes
MSTRG.3912	DYRK1B [Cervus elaphus hippelaphus]	1.5864	0.665758	0.017068	0.116958	up	no
MSTRG.33623	Phosphoacetylglucosamine mutase, partial [Bos mutus]	0.408379	-1.29202	0.0171235	0.117186	down	yes
MSTRG.30703	SEMA3B [Cervus elaphus hippelaphus]	0.313026	-1.67565	0.0171523	0.117353	down	yes
MSTRG.8685	hypothetical protein Celaphus_00014441 [Cervus elaphus hippelaphus]	0.349565	-1.51637	0.0171572	0.117356	down	yes
MSTRG.16031	interferon regulatory factor 9 isoform X1 [Odocoileus virginianus texanus]	1.514	0.598367	0.0171761	0.117455	up	no
MSTRG.13471	NCOA1 [Cervus elaphus hippelaphus];PREDICTED: nuclear receptor coactivator 1 isoform X2 [Ovis aries musimon]	1.51719	0.601406	0.0171869	0.117495	up	no
MSTRG.31115	FAM169A, partial [Cervus elaphus hippelaphus]	2.05416	1.03855	0.0171908	0.117495	up	yes
gene-Celaphus_00001080	hypothetical protein Celaphus_00001080 [Cervus elaphus hippelaphus]	0.281562	-1.82848	0.0171989	0.11752	down	yes
MSTRG.31484	DAB2 [Cervus elaphus hippelaphus]	1.59815	0.676401	0.0172196	0.117601	up	no
MSTRG.5192	HVCN1, partial [Cervus elaphus hippelaphus]	1.59885	0.677035	0.0172608	0.117851	up	no
MSTRG.6658	TMEM92 [Cervus elaphus hippelaphus]	0.226114	-2.14487	0.0172795	0.117949	down	yes
MSTRG.3400	FANCA, partial [Cervus elaphus hippelaphus]	0.375543	-1.41295	0.0172893	0.117985	down	yes
MSTRG.351	hypothetical protein Celaphus_00009009 [Cervus elaphus hippelaphus]	1.67694	0.745832	0.0173103	0.118025	up	no
MSTRG.24483	SMC4 [Cervus elaphus hippelaphus]	0.410165	-1.28572	0.0173522	0.118201	down	yes
MSTRG.1543	hypothetical protein Celaphus_00013402 [Cervus elaphus hippelaphus]	0.302682	-1.72412	0.0173673	0.118255	down	yes
MSTRG.26147	GNL2 [Cervus elaphus hippelaphus]	0.402554	-1.31274	0.0173692	0.118255	down	yes
MSTRG.20562	IARS, partial [Cervus elaphus hippelaphus];hypothetical protein Celaphus_00017028, partial [Cervus elaphus hippelaphus]	0.389713	-1.35952	0.01743	0.118456	down	yes
gene-Celaphus_00000838	SERPINF2 [Cervus elaphus hippelaphus]	4.11381	2.04048	0.0174633	0.118591	up	yes
MSTRG.2352	ESPL1 [Cervus elaphus hippelaphus]	0.352837	-1.50293	0.0174723	0.118619	down	yes
MSTRG.7240	PGS1 [Cervus elaphus hippelaphus]	1.4433	0.52937	0.0174809	0.118619	up	no
MSTRG.10095	IFI30 [Cervus elaphus hippelaphus]	1.57315	0.653656	0.0176504	0.119646	up	no
MSTRG.24863	RIIAD1 [Cervus elaphus hippelaphus]	1.75544	0.811833	0.017721	0.11996	up	no
MSTRG.33050	TWSG1 [Cervus elaphus hippelaphus]	1.86491	0.899104	0.0177239	0.11996	up	no
MSTRG.13514	CENPA [Cervus elaphus hippelaphus]	0.345754	-1.53218	0.0178391	0.120616	down	yes
MSTRG.8717	IER3 [Cervus elaphus hippelaphus]	1.68822	0.755499	0.0178843	0.120798	up	no
MSTRG.17818	hypothetical protein Celaphus_00010863, partial [Cervus elaphus hippelaphus]	1.50444	0.589228	0.0179263	0.121051	up	no
MSTRG.2847	STAT2 [Cervus elaphus hippelaphus]	1.53046	0.613965	0.018103	0.121901	up	no
MSTRG.7330	hypothetical protein Celaphus_00001621 [Cervus elaphus hippelaphus]	1.80668	0.853337	0.018163	0.122243	up	no
MSTRG.9853	ATIC [Cervus elaphus hippelaphus]	0.395534	-1.33813	0.0182632	0.122823	down	yes
MSTRG.9370	DNA-binding protein inhibitor ID-3 [Ovis aries]	1.49946	0.584439	0.0183245	0.123204	up	no
MSTRG.8719	hypothetical protein Celaphus_00014479, partial [Cervus elaphus hippelaphus]	0.318813	-1.64922	0.0183447	0.123309	down	yes
MSTRG.36274	ST3GAL6, partial [Cervus elaphus hippelaphus]	1.71305	0.776565	0.0183933	0.123479	up	no
MSTRG.21363	NCAPG [Cervus elaphus hippelaphus]	0.40194	-1.31495	0.018429	0.123643	down	yes
MSTRG.12156	PLK1 [Cervus elaphus hippelaphus]	0.363846	-1.4586	0.0184468	0.123681	down	yes
MSTRG.8526	PREDICTED: GTP-binding protein 2 isoform X3 [Ovis aries musimon]	1.46166	0.547605	0.0184594	0.123732	up	no
MSTRG.9148	SERPINB1 [Cervus elaphus hippelaphus]	1.72957	0.790415	0.0185138	0.124036	up	no
MSTRG.4359	hypothetical protein Celaphus_00004745 [Cervus elaphus hippelaphus]	2.31342	1.21003	0.0185936	0.124414	up	yes
MSTRG.25801	protein YIPF1 [Camelus ferus]	1.57327	0.653768	0.0186046	0.124455	up	no
MSTRG.29754	hypothetical protein Celaphus_00008039 [Cervus elaphus hippelaphus]	1.63953	0.713283	0.0187566	0.125281	up	no
MSTRG.18978	UNC5B, partial [Cervus elaphus hippelaphus]	1.5212	0.605211	0.0187791	0.125368	up	no
MSTRG.32159	UTRN [Cervus elaphus hippelaphus]	1.58822	0.667414	0.0188051	0.125447	up	no
MSTRG.2319	PDE1B [Cervus elaphus hippelaphus]	1.81339	0.858689	0.0188191	0.125508	up	no
MSTRG.20639	hypothetical protein Celaphus_00017052, partial [Cervus elaphus hippelaphus]	1.74644	0.804418	0.0188287	0.125541	up	no
MSTRG.35460	SKA3 [Cervus elaphus hippelaphus]	0.377786	-1.40436	0.0189259	0.126006	down	yes
MSTRG.36442	CCDC80 [Cervus elaphus hippelaphus]	1.58752	0.666777	0.0189998	0.126426	up	no
MSTRG.24888	hypothetical protein Celaphus_00002041 [Cervus elaphus hippelaphus]	1.60395	0.681625	0.0190116	0.126429	up	no
MSTRG.17876	zinc finger and BTB domain-containing protein 18 isoform X1 [Meriones unguiculatus]	1.54222	0.625006	0.0190418	0.126519	up	no
MSTRG.31051	STK10 [Cervus elaphus hippelaphus]	1.41882	0.504695	0.0190642	0.1266	up	no
MSTRG.26008	TIE1 [Cervus elaphus hippelaphus]	1.63734	0.711351	0.0190886	0.126716	up	no
MSTRG.22408	hypothetical protein Celaphus_00012048 [Cervus elaphus hippelaphus]	1.55889	0.640521	0.0190912	0.126716	up	no
gene-Celaphus_00007969	hypothetical protein Celaphus_00007969, partial [Cervus elaphus hippelaphus]	2.05246	1.03735	0.0191566	0.12699	up	yes
MSTRG.6274	hypothetical protein Celaphus_00000865 [Cervus elaphus hippelaphus]	2.03452	1.02469	0.01917	0.127015	up	yes
MSTRG.5304	SCARB1 [Cervus elaphus hippelaphus]	1.55066	0.63288	0.0191783	0.127038	up	no
MSTRG.16890	SNX33 [Cervus elaphus hippelaphus]	1.45496	0.540983	0.0192202	0.127284	up	no
MSTRG.9471	SH3 domain-binding glutamic acid-rich-like protein 3 [Ictidomys tridecemlineatus]	1.5352	0.618431	0.0192356	0.127323	up	no
MSTRG.10216	TECR [Cervus elaphus hippelaphus]	0.347762	-1.52383	0.0192627	0.127438	down	yes
MSTRG.30394	hypothetical protein Celaphus_00010366, partial [Cervus elaphus hippelaphus]	1.61587	0.692313	0.019285	0.127477	up	no
MSTRG.37066	solute carrier family 40 member 1 [Ovis aries]	1.45651	0.542516	0.0192879	0.127477	up	no
MSTRG.33287	RAB27B [Cervus elaphus hippelaphus]	0.368651	-1.43967	0.0192941	0.127486	down	yes
MSTRG.16998	Serine/threonine-protein kinase D1 [Pteropus alecto];hypothetical protein Celaphus_00015393, partial [Cervus elaphus hippelaphus]	1.57759	0.657723	0.0193142	0.127578	up	no
MSTRG.37766	TMEM37, partial [Cervus elaphus hippelaphus]	1.88374	0.913601	0.0193177	0.127578	up	no
MSTRG.6343	PREDICTED: C-X-C motif chemokine 16 [Capra hircus]	1.64223	0.715659	0.019323	0.127581	up	no
MSTRG.8324	hypothetical protein Celaphus_00014214 [Cervus elaphus hippelaphus]	1.64926	0.721819	0.0193466	0.127641	up	no
MSTRG.29400	hypothetical protein Celaphus_00007800 [Cervus elaphus hippelaphus]	0.168861	-2.56609	0.0195072	0.12838	down	yes
MSTRG.29829	PTGIS, partial [Cervus elaphus hippelaphus];PTGIS [Cervus elaphus hippelaphus]	1.46204	0.547981	0.0195194	0.128429	up	no
MSTRG.9742	WDFY1, partial [Cervus elaphus hippelaphus]	1.42527	0.511234	0.0196377	0.129079	up	no
MSTRG.15685	POLE2 [Cervus elaphus hippelaphus]	0.343892	-1.53997	0.0196782	0.129312	down	yes
MSTRG.26362	hypothetical protein Celaphus_00002848 [Cervus elaphus hippelaphus];PPP1R7, partial [Cervus elaphus hippelaphus];PPP1R7 [Cervus elaphus hippelaphus]	0.365619	-1.45159	0.0196889	0.129347	down	yes
MSTRG.38377	hypothetical protein Celaphus_00009640 [Cervus elaphus hippelaphus]	0.369724	-1.43548	0.0196932	0.129347	down	yes
MSTRG.21543	hypothetical protein Celaphus_00018702 [Cervus elaphus hippelaphus];APBB2 [Cervus elaphus hippelaphus]	0.38201	-1.38832	0.01979	0.129742	down	yes
MSTRG.29717	OSER1 [Cervus elaphus hippelaphus]	0.365992	-1.45012	0.0198479	0.13004	down	yes
MSTRG.15271	bone morphogenetic protein 4, isoform CRA_b, partial [Mus musculus]	1.51136	0.595847	0.0199231	0.130403	up	no
MSTRG.942	CD82 [Cervus elaphus hippelaphus]	2.06496	1.04611	0.0199335	0.130433	up	yes
MSTRG.36343	sentrin-specific protease 7 isoform X1 [Odocoileus virginianus texanus]	1.69852	0.764281	0.0199425	0.130433	up	no
MSTRG.19269	WDFY4 [Cervus elaphus hippelaphus]	3.47728	1.79796	0.019973	0.130588	up	yes
MSTRG.5193	tectonic-1 isoform X1 [Odocoileus virginianus texanus]	1.41741	0.503255	0.0200099	0.130727	up	no
MSTRG.29433	AURKA [Cervus elaphus hippelaphus]	0.37605	-1.411	0.0200171	0.130727	down	yes
MSTRG.1975	TAF1D, partial [Cervus elaphus hippelaphus]	0.409235	-1.289	0.0200458	0.130882	down	yes
MSTRG.38363	CLIC2 [Cervus elaphus hippelaphus]	1.74262	0.801257	0.0200878	0.131074	up	no
MSTRG.15035	ACTN1 [Cervus elaphus hippelaphus]	0.362532	-1.46382	0.0200931	0.131074	down	yes
MSTRG.30645	hypothetical protein Celaphus_00010488 [Cervus elaphus hippelaphus]	0.367085	-1.44581	0.0200939	0.131074	down	yes
MSTRG.21191	Inorganic pyrophosphatase 2, mitochondrial, partial [Bos mutus];hypothetical protein Celaphus_00018565, partial [Cervus elaphus hippelaphus]	0.386294	-1.37223	0.0201617	0.131379	down	yes
MSTRG.28702	MASTL [Cervus elaphus hippelaphus]	0.340127	-1.55585	0.0201731	0.131421	down	yes
MSTRG.15032	ACTN1, partial [Cervus elaphus hippelaphus]	0.371525	-1.42847	0.0202473	0.131807	down	yes
MSTRG.9597	hypothetical protein Celaphus_00014896 [Cervus elaphus hippelaphus]	0.267982	-1.89979	0.0202849	0.131954	down	yes
MSTRG.8256	hypothetical protein Celaphus_00014186, partial [Cervus elaphus hippelaphus]	1.72682	0.788114	0.0203243	0.132113	up	no
MSTRG.23	DDI1 [Cervus elaphus hippelaphus]	0.25811	-1.95394	0.0203353	0.132152	down	yes
MSTRG.2425	rac GTPase-activating protein 1 isoform X1 [Odocoileus virginianus texanus]	0.380637	-1.39351	0.0203912	0.132483	down	yes
MSTRG.35023	hypothetical protein Celaphus_00016507, partial [Cervus elaphus hippelaphus]	1.5231	0.607009	0.0204253	0.13252	up	no
MSTRG.10934	CNN2 [Cervus elaphus hippelaphus]	0.330548	-1.59707	0.0204425	0.132523	down	yes
MSTRG.37256	FKBP7 [Cervus elaphus hippelaphus]	0.358399	-1.48036	0.0204537	0.132563	down	yes
MSTRG.22706	unnamed protein product [Mus musculus]	1.60762	0.684924	0.0205055	0.132769	up	no
gene-Celaphus_00016250	RGS20 [Cervus elaphus hippelaphus]	2.08839	1.06239	0.0205649	0.133055	up	yes
MSTRG.20553	hypothetical protein Celaphus_00017020 [Cervus elaphus hippelaphus];hypothetical protein Celaphus_00017019, partial [Cervus elaphus hippelaphus]	0.380089	-1.39559	0.0205728	0.133057	down	yes
MSTRG.7323	hypothetical protein Celaphus_00001618 [Cervus elaphus hippelaphus]	1.42612	0.512096	0.0206287	0.133332	up	no
MSTRG.32081	hypothetical protein Celaphus_00019035, partial [Cervus elaphus hippelaphus]	1.86064	0.895796	0.0206329	0.133332	up	no
MSTRG.5209	P2RX7, partial [Cervus elaphus hippelaphus]	1.81928	0.863364	0.0206753	0.133508	up	no
MSTRG.24650	CD48, partial [Cervus elaphus hippelaphus]	6.01086	2.58757	0.0206943	0.133598	up	yes
MSTRG.8092	platelet-derived growth factor receptor alpha [Odocoileus virginianus texanus];hypothetical protein Celaphus_00017502 [Cervus elaphus hippelaphus];PDGFRA, partial [Cervus elaphus hippelaphus]	1.54919	0.631511	0.0208876	0.134419	up	no
MSTRG.25562	adhesion G protein-coupled receptor L4 isoform X2 [Odocoileus virginianus texanus]	1.69503	0.76131	0.0209652	0.134885	up	no
MSTRG.4761	hypothetical protein Celaphus_00000065 [Cervus elaphus hippelaphus]	1.45965	0.545625	0.020978	0.134932	up	no
MSTRG.7059	PECAM1, partial [Cervus elaphus hippelaphus]	1.56382	0.645074	0.0210457	0.13514	up	no
gene-Celaphus_00017920	hypothetical protein Celaphus_00017920, partial [Cervus elaphus hippelaphus]	3.10687	1.63546	0.0211395	0.135677	up	yes
MSTRG.17176	PPIP5K1, partial [Cervus elaphus hippelaphus]	1.56608	0.647159	0.0211503	0.13568	up	no
MSTRG.6732	GPR179 [Cervus elaphus hippelaphus]	0.267565	-1.90204	0.0211744	0.135746	down	yes
MSTRG.4166	APOE [Cervus elaphus hippelaphus]	1.52345	0.607344	0.0211772	0.135746	up	no
MSTRG.25652	DIRAS3 [Cervus elaphus hippelaphus]	0.167841	-2.57483	0.0211811	0.135746	down	yes
MSTRG.2729	SLIT-ROBO Rho GTPase-activating protein 1, partial [Cariama cristata]	1.42735	0.513334	0.021197	0.135789	up	no
MSTRG.352	DPAGT1, partial [Cervus elaphus hippelaphus]	0.255136	-1.97066	0.0211981	0.135789	down	yes
MSTRG.16641	hypothetical protein Celaphus_00015204 [Cervus elaphus hippelaphus]	0.379809	-1.39666	0.0213311	0.136409	down	yes
MSTRG.18777	CSGALNACT2, partial [Cervus elaphus hippelaphus]	1.5679	0.648834	0.0213414	0.136424	up	no
MSTRG.31378	DHX29 [Cervus elaphus hippelaphus]	0.414926	-1.26907	0.0214361	0.136865	down	yes
MSTRG.11055	M-phase inducer phosphatase 3 [Bos taurus]	0.319016	-1.6483	0.0214943	0.137117	down	yes
MSTRG.38591	Long-chain-fatty-acid--CoA ligase 4, partial [Bos mutus]	0.400778	-1.31912	0.0215074	0.137139	down	yes
MSTRG.35967	GART [Cervus elaphus hippelaphus]	0.391151	-1.3542	0.0216365	0.137829	down	yes
MSTRG.32861	BTB/POZ domain-containing protein KCTD1-like [Odocoileus virginianus texanus]	0.361818	-1.46666	0.0216764	0.137936	down	yes
MSTRG.19457	MINPP1 [Cervus elaphus hippelaphus]	0.40442	-1.30607	0.021724	0.138125	down	yes
MSTRG.21211	hypothetical protein Celaphus_00018571, partial [Cervus elaphus hippelaphus]	0.367942	-1.44245	0.0217502	0.138202	down	yes
MSTRG.15780	DISP2 [Cervus elaphus hippelaphus]	1.86128	0.896297	0.021777	0.138291	up	no
MSTRG.12486	DTX2 [Cervus elaphus hippelaphus]	1.42757	0.513565	0.0218316	0.138538	up	no
MSTRG.9995	hypothetical protein Celaphus_00002881, partial [Cervus elaphus hippelaphus]	0.33967	-1.55779	0.0219111	0.138944	down	yes
MSTRG.9382	FUCA1 [Cervus elaphus hippelaphus]	1.41849	0.504354	0.0219279	0.139012	up	no
MSTRG.7975	hypothetical protein Celaphus_00017417, partial [Cervus elaphus hippelaphus]	0.420922	-1.24838	0.0219854	0.139279	down	yes
MSTRG.7874	hypothetical protein Celaphus_00017358, partial [Cervus elaphus hippelaphus]	0.20983	-2.25271	0.022096	0.139946	down	yes
MSTRG.1136	condensin-2 complex subunit D3 isoform X4 [Odocoileus virginianus texanus]	0.4044	-1.30614	0.0222004	0.14054	down	yes
MSTRG.395	GRAMD1B [Cervus elaphus hippelaphus]	2.46701	1.30276	0.0222784	0.140899	up	yes
gene-Celaphus_00006509	hypothetical protein Celaphus_00006509 [Cervus elaphus hippelaphus]	1.89396	0.921404	0.0223053	0.14094	up	no
MSTRG.17965	hypothetical protein [Mus musculus]	0.407258	-1.29598	0.0223636	0.141168	down	yes
MSTRG.30766	hypothetical protein Celaphus_00010594 [Cervus elaphus hippelaphus]	0.278093	-1.84636	0.0224437	0.14164	down	yes
MSTRG.20395	LOW QUALITY PROTEIN: ankyrin repeat and death domain-containing protein 1B [Ovis aries]	2.09319	1.0657	0.0225477	0.142207	up	yes
MSTRG.28941	CUBN, partial [Cervus elaphus hippelaphus]	0.406363	-1.29916	0.0226107	0.142489	down	yes
MSTRG.9165	hypothetical protein Celaphus_00014666, partial [Cervus elaphus hippelaphus]	0.136122	-2.87702	0.0226737	0.142784	down	yes
MSTRG.38824	ephrin-B1 precursor [Bos taurus]	1.45784	0.543828	0.0227085	0.142935	up	no
MSTRG.18457	hypothetical protein Celaphus_00011220 [Cervus elaphus hippelaphus]	1.72941	0.790282	0.0227736	0.143311	up	no
MSTRG.33809	NT5DC1, partial [Cervus elaphus hippelaphus]	1.79187	0.841469	0.0228652	0.143716	up	no
MSTRG.15949	RNASE6 [Cervus elaphus hippelaphus]	1.76679	0.821132	0.0228844	0.143768	up	no
MSTRG.19822	PAOX [Cervus elaphus hippelaphus]	1.85649	0.892578	0.0228998	0.143797	up	no
MSTRG.6924	PLEKHH3 [Cervus elaphus hippelaphus]	1.45865	0.544632	0.0229826	0.144187	up	no
MSTRG.3524	keratin-associated protein 5-1 [Bubalus bubalis]	0.263714	-1.92295	0.0230404	0.144439	down	yes
MSTRG.27557	PREDICTED: protein Wnt-7b isoform X1 [Orcinus orca]	0.220208	-2.18306	0.0230924	0.144599	down	yes
MSTRG.6509	PREDICTED: heparan sulfate glucosamine 3-O-sulfotransferase 3A1 [Bison bison bison]	0.340472	-1.55439	0.0230931	0.144599	down	yes
MSTRG.5260	PITPNM2 [Cervus elaphus hippelaphus]	1.5887	0.667845	0.0231856	0.145075	up	no
MSTRG.22107	PHTF2 [Cervus elaphus hippelaphus]	1.45952	0.545498	0.0232055	0.145131	up	no
MSTRG.4062	APLP1 [Cervus elaphus hippelaphus]	1.44743	0.533496	0.0232815	0.145571	up	no
MSTRG.10424	MARCH2 [Cervus elaphus hippelaphus]	1.45584	0.541851	0.0233261	0.145781	up	no
MSTRG.30528	DNASE1L3 [Cervus elaphus hippelaphus]	1.52636	0.610092	0.023398	0.146162	up	no
MSTRG.29517	hypothetical protein Celaphus_00007905, partial [Cervus elaphus hippelaphus]	0.421689	-1.24575	0.0234547	0.146447	down	yes
MSTRG.24647	F11R [Cervus elaphus hippelaphus]	1.63909	0.712893	0.0234767	0.14653	up	no
MSTRG.12363	GUSB [Cervus elaphus hippelaphus]	1.47472	0.560438	0.0234903	0.14653	up	no
MSTRG.6895	STAT5B, partial [Cervus elaphus hippelaphus]	1.47218	0.557954	0.0235953	0.147046	up	no
MSTRG.14663	hypothetical protein Celaphus_00005890, partial [Cervus elaphus hippelaphus]	0.347	-1.52699	0.0236481	0.147271	down	yes
MSTRG.19568	CEP55, partial [Cervus elaphus hippelaphus]	0.378741	-1.40072	0.023675	0.147404	down	yes
MSTRG.6300	hypothetical protein Celaphus_00000884 [Cervus elaphus hippelaphus]	0.379489	-1.39787	0.0237117	0.147598	down	yes
MSTRG.3542	hypothetical protein Celaphus_00004160 [Cervus elaphus hippelaphus]	0.281704	-1.82775	0.0237962	0.148054	down	yes
MSTRG.20672	SIGMAR1 [Cervus elaphus hippelaphus]	0.40196	-1.31488	0.0238083	0.148094	down	yes
MSTRG.38949	WD repeat domain phosphoinositide-interacting protein 4 isoform X1 [Zalophus californianus]	1.43176	0.517791	0.0238465	0.148263	up	no
MSTRG.26404	RECQL4 [Cervus elaphus hippelaphus]	0.372267	-1.42559	0.0238772	0.148418	down	yes
MSTRG.598	hypothetical protein Celaphus_00009127 [Cervus elaphus hippelaphus]	0.392055	-1.35087	0.0239777	0.148891	down	yes
MSTRG.13556	WDR43 [Cervus elaphus hippelaphus]	0.418921	-1.25525	0.0239912	0.148917	down	yes
MSTRG.36424	PHLDB2, partial [Cervus elaphus hippelaphus]	0.421656	-1.24586	0.0240795	0.14936	down	yes
MSTRG.4194	CD3EAP [Cervus elaphus hippelaphus]	0.333525	-1.58413	0.0240968	0.149426	down	yes
MSTRG.35463	hypothetical protein Celaphus_00016657 [Cervus elaphus hippelaphus]	1.38969	0.474765	0.0241234	0.149484	up	no
MSTRG.6153	TRAF4, partial [Cervus elaphus hippelaphus];NEK8 [Cervus elaphus hippelaphus]	1.44447	0.530542	0.0241278	0.149484	up	no
MSTRG.25577	adenylate kinase isoenzyme 5 [Odocoileus virginianus texanus]	3.36057	1.74871	0.0242384	0.149993	up	yes
MSTRG.17476	hypothetical protein Celaphus_00015573 [Cervus elaphus hippelaphus];hypothetical protein Celaphus_00015574, partial [Cervus elaphus hippelaphus]	1.60672	0.684117	0.0242596	0.150089	up	no
MSTRG.9019	CD83 [Cervus elaphus hippelaphus]	0.350625	-1.512	0.024343	0.150469	down	yes
MSTRG.24965	NUDT17 [Cervus elaphus hippelaphus]	1.49694	0.58202	0.0243482	0.150469	up	no
MSTRG.3716	UTP4 [Cervus elaphus hippelaphus]	0.397597	-1.33062	0.0245065	0.151228	down	yes
MSTRG.16260	hypothetical protein Celaphus_00006636, partial [Cervus elaphus hippelaphus]	1.89887	0.925138	0.0246367	0.151818	up	no
MSTRG.38897	TIMP1 [Cervus elaphus hippelaphus]	1.51377	0.598142	0.0247165	0.152197	up	no
MSTRG.713	hypothetical protein Celaphus_00009215 [Cervus elaphus hippelaphus];PLEKHB1, partial [Cervus elaphus hippelaphus]	2.53675	1.34298	0.0247402	0.1522	up	yes
MSTRG.10347	cyclin-dependent kinase 4 inhibitor D [Odocoileus virginianus texanus]	1.53392	0.617219	0.0247955	0.152377	up	no
MSTRG.21295	PREDICTED: tetraspanin-5 isoform X1 [Miniopterus natalensis]	0.384943	-1.37728	0.0248201	0.152377	down	yes
MSTRG.15615	PLEKHO2 [Cervus elaphus hippelaphus]	1.5395	0.622462	0.0248275	0.152377	up	no
gene-Celaphus_00007898	NECAB3 [Cervus elaphus hippelaphus]	1.70469	0.769507	0.0248588	0.15244	up	no
MSTRG.821	KIF18A, partial [Cervus elaphus hippelaphus]	0.344946	-1.53556	0.0248994	0.152619	down	yes
MSTRG.19985	FGFR2, partial [Cervus elaphus hippelaphus];fibroblast growth factor receptor 2 precursor [Oryctolagus cuniculus];hypothetical protein Celaphus_00008745, partial [Cervus elaphus hippelaphus]	0.376226	-1.41033	0.0249254	0.152672	down	yes
MSTRG.6669	unnamed protein product, partial [Gulo gulo]	1.49513	0.580272	0.0249255	0.152672	up	no
MSTRG.19585	PREDICTED: putative glycerol kinase 5 [Galeopterus variegatus]	1.71829	0.780976	0.0249641	0.152873	up	no
MSTRG.5103	hypothetical protein Celaphus_00000283 [Cervus elaphus hippelaphus];hypothetical protein Celaphus_00000284 [Cervus elaphus hippelaphus]	0.389625	-1.35984	0.0250061	0.153068	down	yes
MSTRG.15936	BUB1B [Cervus elaphus hippelaphus]	0.417772	-1.25921	0.0250379	0.153068	down	yes
MSTRG.9596	hypothetical protein Celaphus_00014895 [Cervus elaphus hippelaphus]	0.32788	-1.60876	0.0250397	0.153068	down	yes
MSTRG.7061	PECAM1, partial [Cervus elaphus hippelaphus]	1.55607	0.63791	0.0250423	0.153068	up	no
MSTRG.11271	ANXA6 [Cervus elaphus hippelaphus]	0.339925	-1.55671	0.0250482	0.153068	down	yes
gene-Celaphus_00004493	hypothetical protein Celaphus_00004493, partial [Cervus elaphus hippelaphus]	0.299116	-1.74122	0.0250718	0.153089	down	yes
MSTRG.6640	hypothetical protein Celaphus_00001139, partial [Cervus elaphus hippelaphus]	1.89438	0.921725	0.0251331	0.15334	up	no
MSTRG.30871	hypothetical protein Celaphus_00010658 [Cervus elaphus hippelaphus]	1.94193	0.957488	0.0251488	0.1534	up	no
MSTRG.25028	TRIM45 [Cervus elaphus hippelaphus]	0.376907	-1.40772	0.0252199	0.153763	down	yes
MSTRG.13132	ANGPTL2, partial [Cervus elaphus hippelaphus];ANGPTL2 [Cervus elaphus hippelaphus]	1.50485	0.589624	0.025236	0.153809	up	no
MSTRG.25671	hypothetical protein Celaphus_00002463, partial [Cervus elaphus hippelaphus]	1.71922	0.781751	0.0252406	0.153809	up	no
MSTRG.27528	hypothetical protein Celaphus_00013674, partial [Cervus elaphus hippelaphus]	1.94255	0.957952	0.0252535	0.153826	up	no
MSTRG.1460	VEGFB [Cervus elaphus hippelaphus]	1.46355	0.549476	0.0253183	0.15415	up	no
MSTRG.39305	CNKSR2 [Cervus elaphus hippelaphus]	1.9119	0.935006	0.0253754	0.15432	up	no
MSTRG.11091	TMEM173 [Cervus elaphus hippelaphus]	1.60605	0.683521	0.0253852	0.154343	up	no
MSTRG.29430	FAM210B [Cervus elaphus hippelaphus]	1.48118	0.566742	0.0255153	0.154947	up	no
MSTRG.18678	hypothetical protein Celaphus_00008139, partial [Cervus elaphus hippelaphus]	0.356631	-1.4875	0.0255255	0.154947	down	yes
MSTRG.6830	ORMDL3, partial [Cervus elaphus hippelaphus]	1.50302	0.587867	0.0255766	0.155186	up	no
MSTRG.4654	ZNF135, partial [Cervus elaphus hippelaphus]	1.89893	0.925187	0.0256241	0.155403	up	no
MSTRG.3911	FBL [Cervus elaphus hippelaphus]	0.382978	-1.38467	0.0256436	0.155485	down	yes
MSTRG.29652	PPP1R16B [Cervus elaphus hippelaphus]	1.60363	0.681337	0.0256976	0.155705	up	no
MSTRG.31538	hypothetical protein Celaphus_00018073 [Cervus elaphus hippelaphus]	0.394965	-1.3402	0.0257067	0.155725	down	yes
MSTRG.20225	TLR4 [Cervus elaphus hippelaphus]	1.50733	0.591994	0.0257635	0.155962	up	no
MSTRG.8253	hypothetical protein Celaphus_00014182, partial [Cervus elaphus hippelaphus]	0.400331	-1.32073	0.0257912	0.156073	down	yes
MSTRG.12532	TRIP6 [Cervus elaphus hippelaphus]	0.371515	-1.42851	0.0258869	0.156434	down	yes
MSTRG.28399	FBXO7 [Cervus elaphus hippelaphus]	1.42399	0.509937	0.0259028	0.156482	up	no
MSTRG.23214	NCAPG2, partial [Cervus elaphus hippelaphus];NCAPG2 [Cervus elaphus hippelaphus]	0.398594	-1.32701	0.0259447	0.156664	down	yes
MSTRG.20924	BBS7, partial [Cervus elaphus hippelaphus]	0.398439	-1.32757	0.0259582	0.15671	down	yes
MSTRG.35590	NDFIP2 [Cervus elaphus hippelaphus]	1.73733	0.796869	0.0259881	0.156854	up	no
MSTRG.37593	FMNL2 [Cervus elaphus hippelaphus]	1.6804	0.748808	0.0260381	0.157121	up	no
MSTRG.17478	hypothetical protein Celaphus_00015575 [Cervus elaphus hippelaphus]	1.71369	0.777105	0.0260539	0.15718	up	no
MSTRG.37060	WDR75, partial [Cervus elaphus hippelaphus]	0.419743	-1.25242	0.0260641	0.157205	down	yes
MSTRG.27921	cell division cycle-associated protein 3 isoform X2 [Odocoileus virginianus texanus]	0.38555	-1.37501	0.0261327	0.157538	down	yes
MSTRG.30401	FOXP1 [Cervus elaphus hippelaphus]	0.41977	-1.25233	0.0261433	0.157538	down	yes
MSTRG.32637	hypothetical protein Celaphus_00017545 [Cervus elaphus hippelaphus]	2.07343	1.05202	0.0261514	0.157538	up	yes
MSTRG.24351	transmembrane 4 L6 family member 18 isoform X1 [Odocoileus virginianus texanus]	1.40647	0.492075	0.0261549	0.157538	up	no
MSTRG.35360	ALOX5AP [Cervus elaphus hippelaphus]	2.10225	1.07194	0.0262072	0.157753	up	yes
MSTRG.14590	hypothetical protein Celaphus_00005861 [Cervus elaphus hippelaphus]	1.76973	0.823528	0.0262086	0.157753	up	no
MSTRG.10420	KANK3 [Cervus elaphus hippelaphus]	1.95601	0.967914	0.0263254	0.158312	up	no
MSTRG.15220	DLGAP5 [Cervus elaphus hippelaphus]	0.390019	-1.35838	0.0263816	0.158578	down	yes
MSTRG.36659	acid ceramidase [Odocoileus virginianus texanus]	1.44809	0.534156	0.0264175	0.158757	up	no
MSTRG.12220	CLN3, partial [Cervus elaphus hippelaphus]	1.53979	0.62273	0.026477	0.159043	up	no
MSTRG.24640	KLHDC9 [Cervus elaphus hippelaphus]	1.47501	0.560728	0.0264928	0.159101	up	no
MSTRG.27604	RRP7A [Cervus elaphus hippelaphus]	0.362779	-1.46284	0.0265123	0.159146	down	yes
MSTRG.2631	PTPRB [Cervus elaphus hippelaphus]	1.39761	0.482963	0.0266075	0.15967	up	no
MSTRG.9870	hypothetical protein Celaphus_00015090, partial [Cervus elaphus hippelaphus]	1.99356	0.995345	0.0266116	0.15967	up	no
MSTRG.15783	hypothetical protein Celaphus_00006375 [Cervus elaphus hippelaphus]	0.407195	-1.29621	0.026704	0.160012	down	yes
MSTRG.35200	hypothetical protein Celaphus_00016554 [Cervus elaphus hippelaphus]	1.49052	0.57582	0.0268015	0.160481	up	no
MSTRG.6795	MPP2, partial [Cervus elaphus hippelaphus]	0.296393	-1.75442	0.0271252	0.162052	down	yes
MSTRG.1810	LOW QUALITY PROTEIN: ankyrin repeat and death domain-containing protein 1B [Ovis aries]	1.75155	0.808632	0.0271724	0.162224	up	no
MSTRG.18287	hypothetical protein Celaphus_00011149, partial [Cervus elaphus hippelaphus];hypothetical protein Celaphus_00011150, partial [Cervus elaphus hippelaphus]	1.4434	0.529473	0.0272134	0.162432	up	no
MSTRG.29462	hypothetical protein Celaphus_00007857 [Cervus elaphus hippelaphus]	1.79894	0.847151	0.0272973	0.162754	up	no
MSTRG.6899	signal transducer and activator of transcription 3 isoform 2 [Homo sapiens]	1.40874	0.494408	0.0273148	0.162754	up	no
MSTRG.31923	hypothetical protein Celaphus_00018969 [Cervus elaphus hippelaphus]	0.41711	-1.2615	0.0273163	0.162754	down	yes
MSTRG.13089	FAM102A [Cervus elaphus hippelaphus]	1.55875	0.640391	0.0274109	0.163095	up	no
MSTRG.1206	hypothetical protein Celaphus_00013133 [Cervus elaphus hippelaphus]	0.399796	-1.32266	0.0274332	0.163169	down	yes
MSTRG.26238	TRPM8, partial [Cervus elaphus hippelaphus]	0.163856	-2.6095	0.0274515	0.163169	down	yes
MSTRG.14122	hypothetical protein Celaphus_00005646, partial [Cervus elaphus hippelaphus]	0.427125	-1.22727	0.0275008	0.163409	down	yes
MSTRG.11852	ATP6V0C [Cervus elaphus hippelaphus]	1.45568	0.541696	0.0275075	0.163413	up	no
MSTRG.19056	CFAP70, partial [Cervus elaphus hippelaphus]	1.89053	0.918787	0.0275184	0.163441	up	no
MSTRG.32988	MYL12B [Cervus elaphus hippelaphus]	1.44704	0.533102	0.0275616	0.163624	up	no
MSTRG.2877	MMP19 [Cervus elaphus hippelaphus]	1.3919	0.477051	0.0276068	0.163818	up	no
MSTRG.26069	stromal membrane-associated protein 2 [Bos taurus]	1.6248	0.700264	0.027652	0.16405	up	no
MSTRG.8503	kelch domain-containing protein 3 [Bos taurus]	1.49019	0.575498	0.0277366	0.164404	up	no
MSTRG.36514	hypothetical protein Celaphus_00019218, partial [Cervus elaphus hippelaphus]	0.173841	-2.52416	0.0278715	0.165093	down	yes
MSTRG.31200	NLN [Cervus elaphus hippelaphus]	0.385371	-1.37568	0.0279682	0.165554	down	yes
MSTRG.210	PREDICTED: alpha-crystallin B chain [Camelus dromedarius]	1.58419	0.663745	0.0280649	0.165941	up	no
MSTRG.4827	PES1, partial [Cervus elaphus hippelaphus]	0.388995	-1.36217	0.0280814	0.166001	down	yes
MSTRG.24924	hypothetical protein Celaphus_00002066 [Cervus elaphus hippelaphus]	0.432151	-1.21039	0.0281021	0.166049	down	yes
MSTRG.31050	NPM1 [Cervus elaphus hippelaphus]	0.402308	-1.31363	0.0282892	0.166968	down	yes
MSTRG.8550	NFKBIE, partial [Cervus elaphus hippelaphus]	1.59075	0.669711	0.0283154	0.167072	up	no
MSTRG.6126	NOS2 [Cervus elaphus hippelaphus]	1.80465	0.851723	0.028333	0.167077	up	no
MSTRG.39503	MID1 [Cervus elaphus hippelaphus]	0.374484	-1.41702	0.0283454	0.167113	down	yes
MSTRG.6203	hypothetical protein Celaphus_00000804, partial [Cervus elaphus hippelaphus]	1.46399	0.549908	0.028392	0.16723	up	no
MSTRG.27920	hypothetical protein Celaphus_00013925 [Cervus elaphus hippelaphus]	0.30575	-1.70958	0.0284512	0.167438	down	yes
MSTRG.12997	ASS1 [Cervus elaphus hippelaphus]	2.63239	1.39638	0.0285697	0.168044	up	yes
MSTRG.7738	TPA: KIAA1378 protein-like [Bos taurus]	1.58312	0.662772	0.0285768	0.168044	up	no
MSTRG.11146	PCDH12 [Cervus elaphus hippelaphus]	1.57888	0.658899	0.0286233	0.168226	up	no
MSTRG.5386	hypothetical protein Celaphus_00000461 [Cervus elaphus hippelaphus]	0.394487	-1.34195	0.0287434	0.168745	down	yes
MSTRG.11906	TRAP1 [Cervus elaphus hippelaphus]	0.380772	-1.393	0.0288073	0.16897	down	yes
MSTRG.11665	PREDICTED: uncharacterized protein LOC105078493 [Camelus bactrianus]	1.52186	0.605834	0.0289292	0.169346	up	no
MSTRG.15748	NUSAP1, partial [Cervus elaphus hippelaphus]	0.389038	-1.36202	0.0289633	0.169385	down	yes
MSTRG.6276	CTNS [Cervus elaphus hippelaphus]	1.4452	0.531272	0.0289692	0.169385	up	no
MSTRG.35396	PREDICTED: PAB-dependent poly(A)-specific ribonuclease subunit PAN3 isoform X2 [Bos mutus]	1.47202	0.557798	0.0289701	0.169385	up	no
MSTRG.37821	NIFK, partial [Cervus elaphus hippelaphus]	0.400063	-1.3217	0.0289831	0.169385	down	yes
MSTRG.18003	MIIP [Cervus elaphus hippelaphus]	0.383809	-1.38154	0.0290268	0.169505	down	yes
MSTRG.12226	CLN3, partial [Cervus elaphus hippelaphus]	1.37253	0.456838	0.029055	0.169554	up	no
MSTRG.29174	IDI1 [Cervus elaphus hippelaphus]	0.389871	-1.35893	0.0290698	0.169556	down	yes
MSTRG.23008	PREDICTED: lysine-specific demethylase 7A [Capra hircus]	1.50032	0.585267	0.0291083	0.169706	up	no
MSTRG.34249	PIN2-interacting protein 1, partial [Bos taurus]	0.340496	-1.55429	0.0291126	0.169706	down	yes
MSTRG.18204	hypothetical protein Celaphus_00011081 [Cervus elaphus hippelaphus]	1.47891	0.564533	0.029135	0.169776	up	no
MSTRG.38000	WDR12 [Cervus elaphus hippelaphus]	0.405311	-1.3029	0.0291416	0.169776	down	yes
MSTRG.18914	DNA2 [Cervus elaphus hippelaphus]	0.364455	-1.45619	0.0291719	0.169902	down	yes
MSTRG.32646	NFATC1 [Cervus elaphus hippelaphus]	1.52826	0.611886	0.0291854	0.169927	up	no
MSTRG.4161	PREDICTED: B-cell lymphoma 3 protein isoform X2 [Ovis aries musimon]	1.43587	0.521926	0.0291891	0.169927	up	no
MSTRG.31460	OXCT1 [Cervus elaphus hippelaphus]	0.40562	-1.3018	0.0292137	0.170033	down	yes
MSTRG.14470	PDCL3 [Cervus elaphus hippelaphus]	0.304603	-1.715	0.0292739	0.170218	down	yes
MSTRG.11736	DNA-directed RNA polymerase III subunit RPC10 [Otolemur garnettii]	0.365903	-1.45047	0.0292767	0.170218	down	yes
MSTRG.16338	COL4A3BP [Cervus elaphus hippelaphus]	1.52285	0.606776	0.0292823	0.170218	up	no
MSTRG.8668	NOTCH4 [Cervus elaphus hippelaphus]	1.54205	0.624854	0.0293268	0.17038	up	no
MSTRG.32397	hypothetical protein Celaphus_00019116, partial [Cervus elaphus hippelaphus];hypothetical protein Celaphus_00019115, partial [Cervus elaphus hippelaphus]	1.45425	0.540273	0.0294034	0.170648	up	no
MSTRG.16810	TM2D3 [Cervus elaphus hippelaphus]	1.44256	0.528634	0.0294609	0.170869	up	no
gene-Celaphus_00015541	brain-enriched guanylate kinase-associated protein isoform X2 [Odocoileus virginianus texanus]	0.233086	-2.10106	0.0295233	0.171156	down	yes
MSTRG.4326	hypothetical protein Celaphus_00004716, partial [Cervus elaphus hippelaphus]	0.281009	-1.83131	0.0295515	0.171209	down	yes
MSTRG.1541	flap endonuclease 1 isoform X1 [Odocoileus virginianus texanus]	0.391055	-1.35455	0.0296813	0.171846	down	yes
MSTRG.24593	HSD17B7 [Cervus elaphus hippelaphus]	1.73428	0.794333	0.0297688	0.172277	up	no
MSTRG.21924	MSTP017 [Homo sapiens]	0.419258	-1.25409	0.0298762	0.17271	down	yes
MSTRG.20554	hypothetical protein Celaphus_00017021 [Cervus elaphus hippelaphus]	0.396638	-1.3341	0.0299291	0.172827	down	yes
MSTRG.31456	growth hormone receptor [Cervus nippon]	1.43371	0.519753	0.0300552	0.173403	up	no
MSTRG.14404	DOK1 [Cervus elaphus hippelaphus]	1.40554	0.491126	0.0300927	0.173484	up	no
MSTRG.16347	SFXN1, partial [Cervus elaphus hippelaphus]	0.407042	-1.29675	0.0300954	0.173484	down	yes
MSTRG.29486	DNMT3B [Cervus elaphus hippelaphus]	0.369476	-1.43645	0.0301917	0.174	down	yes
MSTRG.15970	MMP14, partial [Cervus elaphus hippelaphus]	1.64419	0.717378	0.0302774	0.174418	up	no
MSTRG.17972	NAD-dependent ADP-ribosyltransferase sirtuin-4 [Fukomys damarensis]	1.47858	0.564212	0.0303997	0.17497	up	no
MSTRG.7231	hypothetical protein Celaphus_00001566 [Cervus elaphus hippelaphus]	1.39837	0.483742	0.0304233	0.17503	up	no
MSTRG.27720	PRKCA-binding protein isoform X1 [Macaca nemestrina]	1.69206	0.758784	0.0304539	0.175092	up	no
MSTRG.30466	hypothetical protein Celaphus_00010387 [Cervus elaphus hippelaphus]	0.422891	-1.24164	0.0304977	0.175229	down	yes
MSTRG.35454	hypothetical protein Celaphus_00016648, partial [Cervus elaphus hippelaphus];hypothetical protein Celaphus_00016649 [Cervus elaphus hippelaphus]	0.394997	-1.34008	0.0305271	0.17536	down	yes
MSTRG.37774	acyl-CoA-binding protein [Ovis aries]	0.421206	-1.2474	0.0305767	0.175568	down	yes
MSTRG.25034	hypothetical protein Celaphus_00002132 [Cervus elaphus hippelaphus]	0.379848	-1.3965	0.0305989	0.17562	down	yes
MSTRG.23097	SWI/SNF-related matrix-associated actin-dependent regulator of chromatin subfamily D member 3 isoform X3 [Canis lupus familiaris]	1.34735	0.430129	0.0306994	0.176082	up	no
MSTRG.11428	RARS, partial [Cervus elaphus hippelaphus]	0.434552	-1.2024	0.0309149	0.177049	down	yes
MSTRG.31643	PREDICTED: uncharacterized protein LOC105078493 [Camelus bactrianus]	1.48698	0.57239	0.0309487	0.177127	up	no
MSTRG.38996	RIBC1, partial [Cervus elaphus hippelaphus]	0.369284	-1.4372	0.0309756	0.17722	down	yes
MSTRG.6900	STAT3, partial [Cervus elaphus hippelaphus]	1.43582	0.521879	0.0310017	0.177311	up	no
MSTRG.9050	NEDD9, partial [Cervus elaphus hippelaphus]	1.38313	0.467935	0.0310324	0.177342	up	no
MSTRG.36755	SARAF [Cervus elaphus hippelaphus]	0.346295	-1.52993	0.0310332	0.177342	down	yes
gene-Celaphus_00018067	RecName: Full=Prolactin receptor; Short=PRL-R; Flags: Precursor	0.25852	-1.95165	0.0310628	0.177473	down	yes
gene-Celaphus_00013096	transmembrane protein 80 isoform X3 [Odocoileus virginianus texanus]	1.70251	0.767667	0.0310808	0.177537	up	no
MSTRG.10611	LMNB2 [Cervus elaphus hippelaphus]	0.382826	-1.38524	0.0311726	0.177809	down	yes
MSTRG.12114	DNA-directed RNA polymerase III subunit RPC5 isoform X3 [Zalophus californianus]	0.40789	-1.29375	0.0311767	0.177809	down	yes
MSTRG.24008	YBEY [Cervus elaphus hippelaphus]	1.47883	0.564452	0.0311908	0.177809	up	no
MSTRG.7150	hypothetical protein Celaphus_00001500 [Cervus elaphus hippelaphus]	1.73474	0.794717	0.0312024	0.177809	up	no
MSTRG.18104	VAMP3, partial [Cervus elaphus hippelaphus]	1.44081	0.526879	0.0312038	0.177809	up	no
MSTRG.10243	hypothetical protein Celaphus_00003089 [Cervus elaphus hippelaphus]	0.324025	-1.62582	0.031209	0.177809	down	yes
MSTRG.1539	hypothetical protein Celaphus_00013399 [Cervus elaphus hippelaphus];hypothetical protein Celaphus_00013400 [Cervus elaphus hippelaphus]	1.46316	0.549085	0.0312706	0.178121	up	no
MSTRG.7646	hypothetical protein Celaphus_00017267 [Cervus elaphus hippelaphus]	1.42062	0.506522	0.031346	0.178388	up	no
MSTRG.20498	mCG1274, isoform CRA_b, partial [Mus musculus]	0.400558	-1.31992	0.0314529	0.178813	down	yes
MSTRG.3686	NFATC3, partial [Cervus elaphus hippelaphus]	1.4275	0.51349	0.0315065	0.17904	up	no
MSTRG.9811	protein lifeguard 3 [Odocoileus virginianus texanus]	1.45242	0.538458	0.0315405	0.179195	up	no
MSTRG.14577	NCAPH [Cervus elaphus hippelaphus]	0.33978	-1.55733	0.0316653	0.179711	down	yes
MSTRG.200	serine/threonine-protein kinase SIK2 [Odocoileus virginianus texanus]	1.35171	0.43479	0.0316817	0.179766	up	no
MSTRG.18955	EIF4EBP2, partial [Cervus elaphus hippelaphus]	0.397931	-1.32941	0.0317039	0.179853	down	yes
MSTRG.9022	hypothetical protein Celaphus_00014597 [Cervus elaphus hippelaphus]	1.34828	0.431116	0.0317452	0.18001	up	no
MSTRG.6450	hypothetical protein Celaphus_00001019, partial [Cervus elaphus hippelaphus]	1.74554	0.803671	0.0317572	0.180039	up	no
MSTRG.4435	hypothetical protein Celaphus_00004806 [Cervus elaphus hippelaphus]	1.56123	0.64268	0.0318375	0.180378	up	no
MSTRG.6311	hypothetical protein Celaphus_00000896, partial [Cervus elaphus hippelaphus]	1.42552	0.511486	0.0318875	0.180623	up	no
MSTRG.18272	hypothetical protein Celaphus_00011140 [Cervus elaphus hippelaphus]	0.239403	-2.06248	0.0319674	0.180998	down	yes
MSTRG.39097	KDM6A [Cervus elaphus hippelaphus]	1.43125	0.517275	0.0319938	0.181049	up	no
MSTRG.16051	ADCY4 [Cervus elaphus hippelaphus]	1.44368	0.529746	0.0320057	0.181049	up	no
MSTRG.36404	DZIP3, partial [Cervus elaphus hippelaphus]	1.72965	0.790476	0.0320057	0.181049	up	no
MSTRG.23550	MASP1, partial [Cervus elaphus hippelaphus]	4.43178	2.14789	0.0320243	0.181049	up	yes
MSTRG.6967	ARHGAP27, partial [Cervus elaphus hippelaphus]	1.49391	0.579091	0.03205	0.181065	up	no
MSTRG.18302	ANGPTL1 [Cervus elaphus hippelaphus]	0.343103	-1.54329	0.0320609	0.181065	down	yes
MSTRG.37749	hypothetical protein Celaphus_00015936, partial [Cervus elaphus hippelaphus]	0.429445	-1.21945	0.0320665	0.181065	down	yes
MSTRG.7248	TK1, partial [Cervus elaphus hippelaphus]	0.361885	-1.4664	0.0322315	0.18187	down	yes
MSTRG.16259	PREDICTED: LOW QUALITY PROTEIN: junction-mediating and -regulatory protein [Bos mutus]	1.46467	0.550573	0.0322992	0.182213	up	no
MSTRG.3330	hypothetical protein Celaphus_00004011 [Cervus elaphus hippelaphus]	1.38375	0.468578	0.0323214	0.182222	up	no
MSTRG.6704	SNX11, partial [Cervus elaphus hippelaphus]	1.35905	0.4426	0.0324674	0.182899	up	no
MSTRG.22584	MAGUK p55 subfamily member 6 isoform X1 [Odocoileus virginianus texanus];hypothetical protein Celaphus_00012112, partial [Cervus elaphus hippelaphus]	1.52151	0.605505	0.0324868	0.182959	up	no
MSTRG.6943	BRCA1 [Cervus elaphus hippelaphus];BRCA1, partial [Cervus elaphus hippelaphus]	0.415747	-1.26622	0.0324998	0.182964	down	yes
MSTRG.15957	hypothetical protein Celaphus_00006453 [Cervus elaphus hippelaphus]	1.55688	0.63866	0.0325016	0.182964	up	no
MSTRG.23949	ERG [Cervus elaphus hippelaphus];ERG, partial [Cervus elaphus hippelaphus];hypothetical protein Celaphus_00012796 [Cervus elaphus hippelaphus]	1.46765	0.553507	0.0325447	0.183168	up	no
MSTRG.1610	ARHGAP32, partial [Cervus elaphus hippelaphus];TPA: Rho GTPase-activating protein-like [Bos taurus]	0.382382	-1.38691	0.0326051	0.183352	down	yes
MSTRG.37089	hypothetical protein Celaphus_00015650, partial [Cervus elaphus hippelaphus]	1.51966	0.603749	0.0327704	0.184124	up	no
MSTRG.12843	hypothetical protein Celaphus_00005038 [Cervus elaphus hippelaphus]	0.3817	-1.38949	0.0328986	0.184648	down	yes
MSTRG.23019	MKRN1 [Cervus elaphus hippelaphus]	1.62123	0.697087	0.0329098	0.184672	up	no
MSTRG.14295	TTC27, partial [Cervus elaphus hippelaphus]	0.381736	-1.38935	0.032978	0.185016	down	yes
MSTRG.18406	FAM129A [Cervus elaphus hippelaphus];FAM129A, partial [Cervus elaphus hippelaphus]	1.60932	0.68645	0.0331484	0.185774	up	no
MSTRG.26469	TSNARE1, partial [Cervus elaphus hippelaphus]	2.05036	1.03587	0.0331864	0.185909	up	yes
MSTRG.10236	histone chaperone ASF1B [Odocoileus virginianus texanus]	0.371356	-1.42912	0.0332278	0.186101	down	yes
MSTRG.22641	DDX56 [Cervus elaphus hippelaphus]	0.419371	-1.2537	0.0332838	0.186335	down	yes
MSTRG.26465	hypothetical protein Celaphus_00016143 [Cervus elaphus hippelaphus]	1.77814	0.830371	0.0333137	0.186422	up	no
MSTRG.18537	ASPM [Cervus elaphus hippelaphus]	0.394953	-1.34025	0.0333204	0.186422	down	yes
MSTRG.24561	hypothetical protein Celaphus_00001739 [Cervus elaphus hippelaphus]	0.363271	-1.46088	0.0334149	0.186828	down	yes
MSTRG.6944	NBR1 [Cervus elaphus hippelaphus]	1.42748	0.513469	0.0334499	0.18687	up	no
MSTRG.31470	TTC33, partial [Cervus elaphus hippelaphus]	1.63478	0.709094	0.0336527	0.187685	up	no
MSTRG.11245	PDGFRB [Cervus elaphus hippelaphus]	1.44826	0.534318	0.0336688	0.187709	up	no
MSTRG.31763	CCT5 [Cervus elaphus hippelaphus]	0.403726	-1.30855	0.0336712	0.187709	down	yes
MSTRG.27831	KDM5A [Cervus elaphus hippelaphus]	1.45787	0.543861	0.033823	0.18828	up	no
MSTRG.33352	LMAN1, partial [Cervus elaphus hippelaphus]	0.40597	-1.30056	0.0338235	0.18828	down	yes
MSTRG.8293	GCLC [Cervus elaphus hippelaphus];GCLC, partial [Cervus elaphus hippelaphus]	1.74423	0.802593	0.0338629	0.188364	up	no
MSTRG.10395	hypothetical protein Celaphus_00003221 [Cervus elaphus hippelaphus]	1.3881	0.473108	0.0339265	0.188464	up	no
MSTRG.14831	FLVCR2, partial [Cervus elaphus hippelaphus]	3.28742	1.71696	0.0340584	0.188872	up	yes
MSTRG.18342	XPR1, partial [Cervus elaphus hippelaphus]	1.56313	0.644436	0.0341142	0.189001	up	no
MSTRG.9787	hypothetical protein Celaphus_00015018 [Cervus elaphus hippelaphus]	2.53673	1.34297	0.0341175	0.189001	up	yes
MSTRG.4767	hypothetical protein Celaphus_00000076 [Cervus elaphus hippelaphus]	1.59917	0.677327	0.0344325	0.190342	up	no
MSTRG.37290	HNRNPA3, partial [Cervus elaphus hippelaphus]	0.419674	-1.25266	0.0344388	0.190342	down	yes
MSTRG.14402	LOXL3 [Cervus elaphus hippelaphus]	1.45941	0.54539	0.0345438	0.190763	up	no
MSTRG.606	dynein heavy chain domain-containing protein 1-like isoform X1 [Odocoileus virginianus texanus]	0.338545	-1.56258	0.0345827	0.190902	down	yes
MSTRG.34175	hypothetical protein Celaphus_00018156 [Cervus elaphus hippelaphus]	0.241342	-2.05085	0.0345833	0.190902	down	yes
MSTRG.38342	HMGB3 [Cervus elaphus hippelaphus]	0.38604	-1.37318	0.0346423	0.19104	down	yes
MSTRG.32362	PLEKHG1 [Cervus elaphus hippelaphus]	1.57059	0.651305	0.034818	0.191809	up	no
MSTRG.5152	hypothetical protein Celaphus_00000304, partial [Cervus elaphus hippelaphus]	1.52202	0.605987	0.0349036	0.192028	up	no
MSTRG.35330	hypothetical protein Celaphus_00016596 [Cervus elaphus hippelaphus]	0.373967	-1.41902	0.0349482	0.192153	down	yes
MSTRG.5311	AACS [Cervus elaphus hippelaphus]	0.405149	-1.30347	0.0350189	0.192422	down	yes
MSTRG.24828	NPR1 [Cervus elaphus hippelaphus]	1.4131	0.498865	0.0350963	0.192727	up	no
MSTRG.7135	monocarboxylate transporter 4 isoform X1 [Lagenorhynchus obliquidens]	1.43842	0.524485	0.0351169	0.192744	up	no
MSTRG.1099	SSRP1 [Cervus elaphus hippelaphus]	0.401352	-1.31706	0.0352643	0.193368	down	yes
MSTRG.3837	BTB/POZ domain-containing protein KCTD15 [Bos taurus]	0.320133	-1.64326	0.0353179	0.193542	down	yes
MSTRG.10616	U6 snRNA-associated Sm-like protein LSm7 isoform X1 [Pan troglodytes]	0.382078	-1.38806	0.0353363	0.193603	down	yes
MSTRG.28052	deoxyribose-phosphate aldolase [Odocoileus virginianus texanus]	0.395134	-1.33959	0.0353718	0.193757	down	yes
MSTRG.28281	DENND5B [Cervus elaphus hippelaphus]	1.69872	0.764446	0.0354032	0.193889	up	no
MSTRG.15432	hypothetical protein Celaphus_00006228, partial [Cervus elaphus hippelaphus]	1.43476	0.520812	0.035423	0.193957	up	no
MSTRG.22139	PREDICTED: uncharacterized protein LOC105078493 [Camelus bactrianus]	1.48288	0.568401	0.0354432	0.193959	up	no
MSTRG.24589	NUF2, partial [Cervus elaphus hippelaphus];NUF2 [Cervus elaphus hippelaphus]	0.397189	-1.3321	0.0354704	0.194018	down	yes
MSTRG.19293	CXCL12 [Cervus elaphus hippelaphus]	1.31267	0.392508	0.03553	0.194221	up	no
MSTRG.29466	hypothetical protein Celaphus_00007858 [Cervus elaphus hippelaphus]	1.76733	0.821569	0.0355497	0.194288	up	no
MSTRG.12821	NPDC1, partial [Cervus elaphus hippelaphus]	2.17728	1.12253	0.0355911	0.194475	up	yes
MSTRG.23503	hypothetical protein Celaphus_00012558 [Cervus elaphus hippelaphus]	0.351793	-1.5072	0.0356863	0.194954	down	yes
MSTRG.9248	PINK1, partial [Cervus elaphus hippelaphus]	1.34675	0.429484	0.0357402	0.195117	up	no
MSTRG.2450	TROAP, partial [Cervus elaphus hippelaphus]	0.395731	-1.33741	0.0357436	0.195117	down	yes
MSTRG.9534	PTAFR [Cervus elaphus hippelaphus]	1.77525	0.828023	0.0357457	0.195117	up	no
MSTRG.23094	NUB1 [Cervus elaphus hippelaphus]	1.45136	0.537408	0.0357657	0.195186	up	no
MSTRG.27979	hypothetical protein Celaphus_00014004, partial [Cervus elaphus hippelaphus]	0.415499	-1.26708	0.0358599	0.195579	down	yes
MSTRG.681	hypothetical protein Celaphus_00009205 [Cervus elaphus hippelaphus];hypothetical protein Celaphus_00009204 [Cervus elaphus hippelaphus]	1.38543	0.470336	0.0359171	0.19577	up	no
MSTRG.28972	PREDICTED: rho GTPase-activating protein 12 isoform X6 [Ovis aries musimon];hypothetical protein Celaphus_00007539, partial [Cervus elaphus hippelaphus]	1.32037	0.400941	0.0361714	0.19671	up	no
MSTRG.6346	ARRB2 [Cervus elaphus hippelaphus]	1.48559	0.571033	0.0362554	0.197004	up	no
MSTRG.13895	ST6GAL2, partial [Cervus elaphus hippelaphus]	1.6491	0.721681	0.0362969	0.197068	up	no
MSTRG.2225	POC1B, partial [Cervus elaphus hippelaphus]	1.77336	0.826485	0.0363361	0.1972	up	no
MSTRG.25984	SLC6A9, partial [Cervus elaphus hippelaphus]	1.33569	0.417584	0.0364258	0.197605	up	no
MSTRG.11738	RHBDF1 [Cervus elaphus hippelaphus]	1.31272	0.392563	0.0365144	0.198046	up	no
MSTRG.2395	PREDICTED: POU domain, class 6, transcription factor 1 isoform X2 [Bos mutus]	0.370106	-1.43399	0.0365315	0.198097	down	yes
MSTRG.17748	DISP1 [Cervus elaphus hippelaphus]	1.65055	0.722946	0.03668	0.198673	up	no
MSTRG.12109	PREDICTED: promethin [Capra hircus]	1.90008	0.92606	0.0366902	0.198673	up	no
MSTRG.18151	hypothetical protein Celaphus_00011025 [Cervus elaphus hippelaphus]	0.272058	-1.87801	0.0367559	0.198865	down	yes
MSTRG.14282	RASGRP3, partial [Cervus elaphus hippelaphus]	1.41227	0.498019	0.0368299	0.199184	up	no
MSTRG.26425	repressor of RNA polymerase III transcription MAF1 homolog [Odocoileus virginianus texanus]	1.4154	0.501208	0.0369651	0.199773	up	no
MSTRG.9694	SLC16A14 [Cervus elaphus hippelaphus]	1.87746	0.908785	0.0370514	0.200117	up	no
MSTRG.1239	hypothetical protein Celaphus_00013155 [Cervus elaphus hippelaphus]	1.31555	0.395666	0.0370553	0.200117	up	no
MSTRG.29349	hypothetical protein Celaphus_00007764 [Cervus elaphus hippelaphus];laminin subunit alpha-5 [Odocoileus virginianus texanus]	1.45957	0.545547	0.0371033	0.200302	up	no
MSTRG.29602	MYL9, partial [Cervus elaphus hippelaphus]	0.351587	-1.50805	0.0371047	0.200302	down	yes
MSTRG.5275	EIF2B1 [Cervus elaphus hippelaphus]	0.428167	-1.22376	0.0371793	0.200582	down	yes
MSTRG.20589	ERCC6L2, partial [Cervus elaphus hippelaphus]	1.73423	0.794297	0.0372489	0.200875	up	no
MSTRG.7873	hypothetical protein Celaphus_00017357, partial [Cervus elaphus hippelaphus]	0.252879	-1.98348	0.0373584	0.201342	down	yes
MSTRG.10368	low-density lipoprotein receptor [Odocoileus virginianus texanus]	0.381136	-1.39162	0.0376976	0.202675	down	yes
MSTRG.15304	hypothetical protein Celaphus_00006173, partial [Cervus elaphus hippelaphus]	1.457	0.543001	0.0377701	0.20295	up	no
MSTRG.9218	hypothetical protein Celaphus_00014697 [Cervus elaphus hippelaphus]	0.402021	-1.31466	0.037772	0.20295	down	yes
MSTRG.10336	TYK2 [Cervus elaphus hippelaphus]	1.46415	0.550064	0.0378464	0.203185	up	no
MSTRG.7563	TACC3 [Cervus elaphus hippelaphus]	0.409768	-1.28712	0.0378899	0.203305	down	yes
MSTRG.19153	hypothetical protein Celaphus_00008318, partial [Cervus elaphus hippelaphus]	1.58807	0.66727	0.0378918	0.203305	up	no
MSTRG.7412	hypothetical protein Celaphus_00001672, partial [Cervus elaphus hippelaphus];hypothetical protein Celaphus_00001673, partial [Cervus elaphus hippelaphus]	1.36542	0.44934	0.0379004	0.20331	up	no
MSTRG.13525	CAD [Cervus elaphus hippelaphus];ATRAID, partial [Cervus elaphus hippelaphus]	0.386622	-1.371	0.0379462	0.203473	down	yes
gene-Celaphus_00016127	hypothetical protein Celaphus_00016127 [Cervus elaphus hippelaphus]	0.31959	-1.6457	0.0380034	0.203738	down	yes
MSTRG.25307	RNA 3'-terminal phosphate cyclase isoform X3 [Lagenorhynchus obliquidens]	0.415277	-1.26785	0.0382402	0.2048	down	yes
MSTRG.4185	trafficking protein particle complex subunit 6A [Neophocaena asiaeorientalis asiaeorientalis]	1.64183	0.715307	0.0382486	0.204804	up	no
MSTRG.8464	FRS3 [Cervus elaphus hippelaphus]	1.58184	0.661607	0.0382795	0.204913	up	no
MSTRG.13152	HSPA5 [Cervus elaphus hippelaphus]	0.419439	-1.25347	0.0383848	0.205232	down	yes
MSTRG.4395	FAM71E1 [Cervus elaphus hippelaphus]	1.96868	0.97723	0.0383907	0.205232	up	no
MSTRG.8940	hypothetical protein Celaphus_00014585 [Cervus elaphus hippelaphus]	0.44328	-1.17371	0.0384588	0.205471	down	yes
MSTRG.34141	Midasin [Bos mutus]	0.439847	-1.18493	0.0385711	0.206025	down	yes
MSTRG.6759	PLXDC1 [Cervus elaphus hippelaphus]	0.205764	-2.28094	0.0386155	0.2061	down	yes
MSTRG.35115	hypothetical protein Celaphus_00016528, partial [Cervus elaphus hippelaphus]	0.389647	-1.35976	0.0386911	0.20642	down	yes
gene-Celaphus_00019261	PDLIM3 [Cervus elaphus hippelaphus]	0.294073	-1.76576	0.0387071	0.206464	down	yes
MSTRG.33686	fatty acid-binding protein, brain [Odocoileus virginianus texanus]	0.240534	-2.05568	0.0388899	0.207271	down	yes
MSTRG.27244	hypothetical protein Celaphus_00016405 [Cervus elaphus hippelaphus]	0.394098	-1.34337	0.0389108	0.207313	down	yes
MSTRG.26911	hypothetical protein Celaphus_00016303 [Cervus elaphus hippelaphus]	1.40038	0.485814	0.0389489	0.207377	up	no
MSTRG.19661	CRTAC1, partial [Cervus elaphus hippelaphus];CRTAC1 [Cervus elaphus hippelaphus]	2.39302	1.25883	0.0389622	0.207406	up	yes
MSTRG.36861	GINS4 [Cervus elaphus hippelaphus]	0.33519	-1.57695	0.0390235	0.207649	down	yes
MSTRG.36409	DZIP3 [Cervus elaphus hippelaphus]	1.55323	0.635275	0.0390327	0.207656	up	no
MSTRG.6528	hypothetical protein Celaphus_00001060, partial [Cervus elaphus hippelaphus]	0.390035	-1.35832	0.0391224	0.207966	down	yes
MSTRG.9813	SLC11A1 [Cervus elaphus hippelaphus]	3.31314	1.7282	0.039216	0.208254	up	yes
MSTRG.14139	hypothetical protein Celaphus_00005656, partial [Cervus elaphus hippelaphus]	1.44264	0.528716	0.0393329	0.208749	up	no
MSTRG.10433	ADAMTS10 [Cervus elaphus hippelaphus]	1.3483	0.431143	0.0395919	0.209871	up	no
MSTRG.28711	hypothetical protein Celaphus_00007471, partial [Cervus elaphus hippelaphus]	1.38422	0.469068	0.0396753	0.210271	up	no
MSTRG.5886		0.422543	-1.24283	0.0397189	0.210378	down	yes
MSTRG.12722	hypothetical protein Celaphus_00007361 [Cervus elaphus hippelaphus]	0.339417	-1.55887	0.0397337	0.210378	down	yes
MSTRG.11306	glutamate receptor GLUR1 [Homo sapiens]	0.323289	-1.6291	0.0397355	0.210378	down	yes
MSTRG.16794	hypothetical protein Celaphus_00015285 [Cervus elaphus hippelaphus]	1.62522	0.700631	0.0399214	0.211024	up	no
MSTRG.37757	hypothetical protein Celaphus_00015937 [Cervus elaphus hippelaphus]	1.60602	0.683493	0.0399856	0.211279	up	no
MSTRG.27536	GTSE1, partial [Cervus elaphus hippelaphus]	0.391645	-1.35238	0.0400495	0.211532	down	yes
MSTRG.2980	PCNA-interacting partner isoform X1 [Ovis aries]	0.376876	-1.40784	0.0401128	0.211702	down	yes
MSTRG.12818	hypothetical protein Celaphus_00005014, partial [Cervus elaphus hippelaphus]	1.47937	0.56498	0.0401404	0.211769	up	no
MSTRG.10251	hypothetical protein Celaphus_00003093 [Cervus elaphus hippelaphus]	1.44667	0.532736	0.0401424	0.211769	up	no
MSTRG.18265	CACYBP, partial [Cervus elaphus hippelaphus]	0.408935	-1.29006	0.0401601	0.2118	down	yes
MSTRG.10917	FSTL3 [Cervus elaphus hippelaphus];hypothetical protein Celaphus_00003533 [Cervus elaphus hippelaphus]	0.412496	-1.27755	0.0402631	0.212067	down	yes
MSTRG.5340	POLE [Cervus elaphus hippelaphus]	0.424673	-1.23558	0.0404227	0.212738	down	yes
MSTRG.14213	aldose 1-epimerase [Odocoileus virginianus texanus];GALM [Cervus elaphus hippelaphus]	1.29745	0.375673	0.0404672	0.212803	up	no
MSTRG.36978	UBE2E1 [Cervus elaphus hippelaphus]	1.40458	0.490141	0.0405053	0.212961	up	no
MSTRG.27883	RAD51AP1, partial [Cervus elaphus hippelaphus]	0.406539	-1.29853	0.0405688	0.213153	down	yes
MSTRG.8177	GABRA2, partial [Cervus elaphus hippelaphus]	0.356989	-1.48605	0.0405741	0.213153	down	yes
MSTRG.23149	hypothetical protein Celaphus_00012428 [Cervus elaphus hippelaphus];ZNF862, partial [Cervus elaphus hippelaphus]	1.35035	0.433334	0.0406025	0.21326	up	no
MSTRG.24317	hypothetical protein Celaphus_00013015 [Cervus elaphus hippelaphus]	1.72311	0.785013	0.0406311	0.213368	up	no
MSTRG.11205	hypothetical protein Celaphus_00003730 [Cervus elaphus hippelaphus]	1.43938	0.525452	0.0406604	0.213437	up	no
MSTRG.8741	BOLA, partial [Cervus elaphus hippelaphus];MHC class I antigen [Bos taurus]	1.37096	0.455181	0.040735	0.213786	up	no
MSTRG.14568	hypothetical protein Celaphus_00005841, partial [Cervus elaphus hippelaphus];hypothetical protein Celaphus_00005842, partial [Cervus elaphus hippelaphus]	1.31701	0.397266	0.0408128	0.214067	up	no
MSTRG.16583	KLHL25 [Cervus elaphus hippelaphus]	1.38828	0.473299	0.0408271	0.214075	up	no
MSTRG.31958	hypothetical protein Celaphus_00018984 [Cervus elaphus hippelaphus]	0.412616	-1.27713	0.0408384	0.214075	down	yes
MSTRG.29180	GTPBP4 [Cervus elaphus hippelaphus]	0.441996	-1.17789	0.0408387	0.214075	down	yes
MSTRG.30396	Eukaryotic translation initiation factor 4E type 3, partial [Bos mutus]	1.39233	0.4775	0.0408762	0.214229	up	no
MSTRG.333	HYOU1 [Cervus elaphus hippelaphus]	0.413699	-1.27335	0.0409658	0.214571	down	yes
MSTRG.28492	PLCB1 [Cervus elaphus hippelaphus]	0.37708	-1.40706	0.041145	0.215169	down	yes
MSTRG.33052	hypothetical protein Celaphus_00017717 [Cervus elaphus hippelaphus]	1.40932	0.494999	0.0411807	0.21527	up	no
MSTRG.5454	PLK4 [Cervus elaphus hippelaphus]	0.428671	-1.22206	0.0412408	0.215542	down	yes
MSTRG.30781	KIF9 [Cervus elaphus hippelaphus]	1.53148	0.614924	0.0412669	0.215593	up	no
MSTRG.18024	SRM, partial [Cervus elaphus hippelaphus]	0.360237	-1.47298	0.041338	0.215922	down	yes
MSTRG.5012	MVK, partial [Cervus elaphus hippelaphus];MVK [Cervus elaphus hippelaphus]	0.44366	-1.17248	0.0414452	0.216396	down	yes
MSTRG.12725	PREDICTED: eukaryotic translation initiation factor 3 subunit B [Capra hircus]	0.408163	-1.29278	0.0415469	0.216713	down	yes
MSTRG.32381	ESR1 [Cervus elaphus hippelaphus]	0.419777	-1.2523	0.0416203	0.217053	down	yes
MSTRG.28997	hypothetical protein Celaphus_00007547 [Cervus elaphus hippelaphus]	1.37641	0.460911	0.0416694	0.217166	up	no
MSTRG.31955	hypothetical protein Celaphus_00018983 [Cervus elaphus hippelaphus]	0.406033	-1.30033	0.0416897	0.217166	down	yes
MSTRG.30863	RAF1, partial [Cervus elaphus hippelaphus]	1.3774	0.461947	0.0417237	0.217222	up	no
MSTRG.28849	FAM107B [Cervus elaphus hippelaphus]	1.43053	0.516549	0.0417268	0.217222	up	no
MSTRG.18344	XPR1, partial [Cervus elaphus hippelaphus]	1.64699	0.719832	0.0417499	0.217259	up	no
MSTRG.14608	BUB1 [Cervus elaphus hippelaphus]	0.404258	-1.30665	0.0417501	0.217259	down	yes
MSTRG.3567	SLC38A7, partial [Cervus elaphus hippelaphus]	1.44009	0.526156	0.0418671	0.217738	up	no
MSTRG.33621	PGM3, partial [Cervus elaphus hippelaphus]	0.431147	-1.21375	0.0419052	0.217894	down	yes
MSTRG.32615	hypothetical protein Celaphus_00019188 [Cervus elaphus hippelaphus]	1.79571	0.844555	0.0419272	0.217965	up	no
MSTRG.38459	hypothetical protein Celaphus_00009713, partial [Cervus elaphus hippelaphus]	0.364798	-1.45483	0.0419543	0.217993	down	yes
MSTRG.18303	TOR3A [Cervus elaphus hippelaphus]	1.36721	0.451231	0.0419573	0.217993	up	no
MSTRG.7155	PREDICTED: ethanolamine-phosphate cytidylyltransferase isoform X6 [Ovis aries musimon]	0.415927	-1.2656	0.0420448	0.218319	down	yes
MSTRG.9752	hypothetical protein Celaphus_00014993 [Cervus elaphus hippelaphus]	0.435415	-1.19954	0.0420811	0.218465	down	yes
MSTRG.29344	hypothetical protein Celaphus_00007756 [Cervus elaphus hippelaphus]	1.51588	0.60016	0.0421215	0.218589	up	no
MSTRG.7208	SLC26A11 [Cervus elaphus hippelaphus]	1.3804	0.46509	0.0421764	0.218788	up	no
MSTRG.27210	hypothetical protein Celaphus_00016398 [Cervus elaphus hippelaphus]	1.6803	0.748716	0.0423464	0.219397	up	no
MSTRG.37976	STE20-related kinase adapter protein beta isoform X1 [Odocoileus virginianus texanus]	1.50601	0.59073	0.0423732	0.219426	up	no
MSTRG.1586	hypothetical protein Celaphus_00013471 [Cervus elaphus hippelaphus]	1.3913	0.476436	0.0423743	0.219426	up	no
MSTRG.35657	hypothetical protein Celaphus_00016783, partial [Cervus elaphus hippelaphus]	0.399322	-1.32438	0.0423963	0.219461	down	yes
MSTRG.8523	POLR1C [Cervus elaphus hippelaphus]	0.398498	-1.32736	0.0423975	0.219461	down	yes
MSTRG.3276	CENPN, partial [Cervus elaphus hippelaphus]	0.402586	-1.31263	0.042525	0.21992	down	yes
MSTRG.20632	GOLM1, partial [Cervus elaphus hippelaphus];GOLM1 [Cervus elaphus hippelaphus]	0.381207	-1.39135	0.042541	0.21992	down	yes
MSTRG.26237	hypothetical protein Celaphus_00002794, partial [Cervus elaphus hippelaphus]	0.387713	-1.36694	0.0425612	0.21992	down	yes
MSTRG.30265	ZNF445, partial [Cervus elaphus hippelaphus]	0.453977	-1.13931	0.042645	0.220181	down	yes
MSTRG.23875	TBC1D5, partial [Cervus elaphus hippelaphus]	1.32961	0.411008	0.0426556	0.220193	up	no
MSTRG.23257	hypothetical protein Celaphus_00012485 [Cervus elaphus hippelaphus]	0.394204	-1.34299	0.0426728	0.220239	down	yes
MSTRG.20451	hypothetical protein Celaphus_00016967 [Cervus elaphus hippelaphus];ABCA1, partial [Cervus elaphus hippelaphus]	1.34373	0.426247	0.0427495	0.220462	up	no
MSTRG.300	hypothetical protein Celaphus_00008956 [Cervus elaphus hippelaphus];hypothetical protein Celaphus_00008957, partial [Cervus elaphus hippelaphus]	0.407119	-1.29648	0.042832	0.220677	down	yes
MSTRG.31420	PARP8 [Cervus elaphus hippelaphus]	1.55316	0.63521	0.0428446	0.220677	up	no
gene-Celaphus_00009118	hypothetical protein Celaphus_00009118, partial [Cervus elaphus hippelaphus]	1.64024	0.71391	0.0428472	0.220677	up	no
[truncated: 19,330 more rows]
